# Supplementary material for: Oxidative stress accelerates repeat sequence instability and base substitutions promoting gastrointestinal driver mutations in MSH2 deficient mice
Source: Genes Environ. 2025 Oct 23;47:19. doi: 10.1186/s41021-025-00342-y (PMC12548293; doi:10.1186/s41021-025-00342-y)
Supplement: Supplementary file 2 — Additional file 2: Supplemental Table S1. rpsL assay mutatnt frequency. [file 41021_2025_342_MOESM2_ESM.xlsx]

## Sheet: rpsL_MutatantFreq
Supllemental Table S1. Results of rpsL assay
Msh2 genotype	Experimental group / treatment	mouse ID	Kmr clones screened (x 105)	KmSmr clones	total Mutant Frequency (x 10-5)
+/+	Control	W-1	0.672	2	2.97619
+/+	Control	W-2	0.903	1	1.10742
+/+	Control	W-3	0.581	4	6.88468
+/+	Control	W-4	1.785	3	1.68067
+/+	Control	W-5	4.8258	11	2.27941
+/+	Control	W-6	3.3488	3	0.895843
+/+	Control	W-7	1.2838	1	0.778938
+/+	KB03 0.15%	W-8	1.575	8	5.07937
+/+	KB03 0.15%	W-9	0.98	4	4.08163
+/+	KB03 0.15%	W-10	1.9572	7	3.57654
+/+	KB03 0.15%	W-11	2.4318	7	2.87853
+/+	KB03 0.15%	W-12	4.8188	11	2.28273
+/+	KB03 0.15%	W-13	4.2616	8	1.87723
-/-	Control	KO-1	2.9988	66	22.0088
-/-	Control	KO-2	3.2	86	26.875
-/-	Control	KO-3	1.442	46	31.9001
-/-	Control	KO-4	0.57	22	38.8
-/-	Control	KO-5	8.47	210	24.7934
-/-	KB03 0.15%	KO-6	0.36	32	87.91
-/-	KB03 0.15%	KO-7	0.959	51	53.1804
-/-	KB03 0.15%	KO-8	0.89	59	66.37
-/-	KB03 0.15%	KO-9	2.163	90	41.6089
-/-	KB03 0.15%	KO-10	1.87	79	42.246
