# Supplementary material for: Oxidative stress accelerates repeat sequence instability and base substitutions promoting gastrointestinal driver mutations in MSH2 deficient mice
Source: Genes Environ. 2025 Oct 23;47:19. doi: 10.1186/s41021-025-00342-y (PMC12548293; doi:10.1186/s41021-025-00342-y)
Supplement: Supplementary file 3 — Additional file 3: Supplemental Table S2. Tumor-specific mutations in tumor WGS. [file 41021_2025_342_MOESM3_ESM.xlsx]

## Sheet: m2_integrated_PASS
Supplemental Table S2. Somatic mutations in small intestinal tumors of Msh2 nockout mice
	sample information: 613_T1 tumor from control mouse, 3147_T1 tumor form 0.15% KBrO3-treated mouse, 2985_T1 tumor from 0.2% KBrO3-treated mouse
#CHROM	POS	ID	REF	ALT	QUAL	FILTER	INFO	FORMAT	normal	tumor	sample
chr1	3004246	.	CA	C	.	PASS	AS_FilterStatus=SITE;AS_SB_TABLE=31,47|1,3;DP=87;ECNT=1;GERMQ=93;MBQ=36,36;MFRL=440,389;MMQ=60,60;MPOS=38;NALOD=1.69;NLOD=13.52;POPAF=6.00;RPA=7,6;RU=A;STR;STRQ=93;TLOD=6.15;ANN=C|intergenic_region|MODIFIER|CHR_START-Gm16088|CHR_START-ENSMUSG00000090025|intergenic_region|CHR_START-ENSMUSG00000090025|||n.3004247delA||||||	GT:AD:AF:DP:F1R2:F2R1:SB	0/0:46,0:0.020:46:22,0:24,0:19,27,0,0	0/1:32,4:0.134:36:17,2:12,1:12,20,1,3	613_T1
chr1	3006842	.	G	T	.	PASS	AS_FilterStatus=SITE;AS_SB_TABLE=36,18|3,5;DP=63;ECNT=1;GERMQ=93;MBQ=35,35;MFRL=433,442;MMQ=60,60;MPOS=30;NALOD=1.59;NLOD=11.34;POPAF=6.00;TLOD=21.64;ANN=T|intergenic_region|MODIFIER|CHR_START-Gm16088|CHR_START-ENSMUSG00000090025|intergenic_region|CHR_START-ENSMUSG00000090025|||n.3006842G>T||||||	GT:AD:AF:DP:F1R2:F2R1:SB	0/0:39,0:0.025:39:24,0:12,0:27,12,0,0	0/1:15,8:0.358:23:7,4:6,3:9,6,3,5	2985_T1
chr1	3022845	.	GA	G	.	PASS	AS_FilterStatus=SITE;AS_SB_TABLE=40,38|1,3;DP=89;ECNT=1;GERMQ=93;MBQ=34,33;MFRL=431,446;MMQ=60,60;MPOS=47;NALOD=1.61;NLOD=11.42;POPAF=6.00;RPA=5,4;RU=A;STR;STRQ=93;TLOD=6.37;ANN=G|intergenic_region|MODIFIER|CHR_START-Gm16088|CHR_START-ENSMUSG00000090025|intergenic_region|CHR_START-ENSMUSG00000090025|||n.3022846delA||||||	GT:AD:AF:DP:F1R2:F2R1:SB	0/0:38,0:0.024:38:14,0:24,0:19,19,0,0	0/1:40,4:0.113:44:21,3:19,1:21,19,1,3	613_T1
chr1	3061077	.	G	A	.	PASS	AS_FilterStatus=SITE;AS_SB_TABLE=38,37|2,2;DP=79;ECNT=1;GERMQ=93;MBQ=33,34;MFRL=439,484;MMQ=60,60;MPOS=60;NALOD=1.60;NLOD=11.65;POPAF=6.00;TLOD=9.04;ANN=A|intergenic_region|MODIFIER|Gm16088-Gm26206|ENSMUSG00000090025-ENSMUSG00000064842|intergenic_region|ENSMUSG00000090025-ENSMUSG00000064842|||n.3061077G>A||||||	GT:AD:AF:DP:F1R2:F2R1:SB	0/0:39,0:0.024:39:15,0:22,0:18,21,0,0	0/1:36,4:0.119:40:13,1:21,3:20,16,2,2	613_T1
chr1	3067597	.	C	T	.	PASS	AS_FilterStatus=SITE;AS_SB_TABLE=29,31|1,4;DP=66;ECNT=1;GERMQ=93;MBQ=28,34;MFRL=423,509;MMQ=60,60;MPOS=35;NALOD=1.56;NLOD=10.53;POPAF=6.00;TLOD=12.94;ANN=T|intergenic_region|MODIFIER|Gm16088-Gm26206|ENSMUSG00000090025-ENSMUSG00000064842|intergenic_region|ENSMUSG00000090025-ENSMUSG00000064842|||n.3067597C>T||||||	GT:AD:AF:DP:F1R2:F2R1:SB	0/0:36,0:0.027:36:22,0:14,0:18,18,0,0	0/1:24,5:0.194:29:12,2:12,3:11,13,1,4	2985_T1
chr1	3095794	.	C	A	.	PASS	AS_FilterStatus=SITE;AS_SB_TABLE=29,44|1,4;DP=80;ECNT=1;GERMQ=93;MBQ=35,34;MFRL=432,433;MMQ=60,60;MPOS=15;NALOD=1.67;NLOD=13.50;POPAF=6.00;TLOD=12.83;ANN=A|intergenic_region|MODIFIER|Gm16088-Gm26206|ENSMUSG00000090025-ENSMUSG00000064842|intergenic_region|ENSMUSG00000090025-ENSMUSG00000064842|||n.3095794C>A||||||	GT:AD:AF:DP:F1R2:F2R1:SB	0/0:47,0:0.021:47:24,0:21,0:20,27,0,0	0/1:26,5:0.193:31:11,2:15,3:9,17,1,4	2985_T1
chr1	3099066	.	G	A	.	PASS	AS_FilterStatus=SITE;AS_SB_TABLE=27,29|4,3;DP=66;ECNT=1;GERMQ=93;MBQ=34,34;MFRL=456,527;MMQ=60,60;MPOS=39;NALOD=1.45;NLOD=8.13;POPAF=6.00;TLOD=18.33;ANN=A|upstream_gene_variant|MODIFIER|Gm26206|ENSMUSG00000064842|transcript|ENSMUST00000082908|snRNA||n.-2950G>A|||||2950|,A|intergenic_region|MODIFIER|Gm16088-Gm26206|ENSMUSG00000090025-ENSMUSG00000064842|intergenic_region|ENSMUSG00000090025-ENSMUSG0…	GT:AD:AF:DP:F1R2:F2R1:SB	0/0:27,0:0.034:27:12,0:15,0:13,14,0,0	0/1:29,7:0.210:36:15,5:14,2:14,15,4,3	2985_T1
chr1	3157451	.	G	T	.	PASS	AS_FilterStatus=SITE;AS_SB_TABLE=21,26|1,2;DP=56;ECNT=1;GERMQ=93;MBQ=34,33;MFRL=437,436;MMQ=60,60;MPOS=50;NALOD=1.43;NLOD=7.52;POPAF=6.00;TLOD=6.64;ANN=T|intergenic_region|MODIFIER|Gm26206-Xkr4|ENSMUSG00000064842-ENSMUSG00000051951|intergenic_region|ENSMUSG00000064842-ENSMUSG00000051951|||n.3157451G>T||||||	GT:AD:AF:DP:F1R2:F2R1:SB	0/0:25,0:0.036:25:13,0:12,0:10,15,0,0	0/1:22,3:0.147:25:10,2:9,1:11,11,1,2	2985_T1
chr1	3196523	.	CTT	C	.	PASS	AS_FilterStatus=SITE;AS_SB_TABLE=19,17|1,5;DP=49;ECNT=1;GERMQ=77;MBQ=34,35;MFRL=399,438;MMQ=60,60;MPOS=34;NALOD=1.21;NLOD=8.13;POPAF=6.00;RPA=14,12;RU=T;STR;STRQ=93;TLOD=13.65;ANN=C|intergenic_region|MODIFIER|Gm26206-Xkr4|ENSMUSG00000064842-ENSMUSG00000051951|intergenic_region|ENSMUSG00000064842-ENSMUSG00000051951|||n.3196524_3196525delTT||||||	GT:AD:AF:DP:F1R2:F2R1:SB	0/0:27,0:0.032:27:11,0:13,0:15,12,0,0	0/1:9,6:0.413:15:4,4:5,2:4,5,1,5	2985_T1
chr1	3209399	.	G	A	.	PASS	AS_FilterStatus=SITE;AS_SB_TABLE=37,40|4,3;DP=85;ECNT=1;GERMQ=93;MBQ=33,33;MFRL=438,375;MMQ=60,60;MPOS=33;NALOD=1.58;NLOD=11.13;POPAF=6.00;TLOD=16.66;ANN=A|intragenic_variant|MODIFIER|Xkr4|ENSMUSG00000051951|gene_variant|ENSMUSG00000051951|||n.3209399C>T||||||	GT:AD:AF:DP:F1R2:F2R1:SB	0/0:37,0:0.026:37:21,0:16,0:20,17,0,0	0/1:40,7:0.163:47:18,3:22,4:17,23,4,3	613_T1
chr1	3233310	.	G	T	.	PASS	AS_FilterStatus=SITE;AS_SB_TABLE=27,27|2,1;DP=58;ECNT=1;GERMQ=93;MBQ=28,36;MFRL=456,387;MMQ=60,38;MPOS=2;NALOD=1.52;NLOD=9.33;POPAF=6.00;TLOD=11.59;ANN=T|intron_variant|MODIFIER|Xkr4|ENSMUSG00000051951|transcript|ENSMUST00000070533|protein_coding|2/2|c.998-16342C>A||||||	GT:AD:AF:DP:F1R2:F2R1:SB	0/0:29,0:0.030:29:12,0:11,0:15,14,0,0	0/1:25,3:0.160:28:10,1:14,2:12,13,2,1	3147_T1
chr1	3234791	.	T	A	.	PASS	AS_FilterStatus=SITE;AS_SB_TABLE=42,32|5,2;DP=84;ECNT=2;GERMQ=93;MBQ=36,35;MFRL=427,412;MMQ=60,40;MPOS=35;NALOD=1.63;NLOD=12.03;POPAF=6.00;TLOD=22.48;ANN=A|intron_variant|MODIFIER|Xkr4|ENSMUSG00000051951|transcript|ENSMUST00000070533|protein_coding|2/2|c.998-17823A>T||||||	GT:AD:AF:DP:F1R2:F2R1:SB	0/0:40,0:0.023:40:14,0:24,0:21,19,0,0	0/1:34,7:0.185:41:19,5:13,2:21,13,5,2	2985_T1
chr1	3279383	.	G	A	.	PASS	AS_FilterStatus=SITE;AS_SB_TABLE=32,43|2,2;DP=80;ECNT=1;GERMQ=93;MBQ=34,36;MFRL=462,484;MMQ=60,60;MPOS=32;NALOD=1.67;NLOD=13.54;POPAF=6.00;TLOD=10.17;ANN=A|intron_variant|MODIFIER|Xkr4|ENSMUSG00000051951|transcript|ENSMUST00000070533|protein_coding|2/2|c.998-62415C>T||||||	GT:AD:AF:DP:F1R2:F2R1:SB	0/0:45,0:0.021:45:18,0:26,0:20,25,0,0	0/1:30,4:0.143:34:15,2:14,2:12,18,2,2	613_T1
chr1	3301690	.	TA	T	.	PASS	AS_FilterStatus=SITE;AS_SB_TABLE=21,20|8,10;DP=65;ECNT=1;GERMQ=88;MBQ=34,34;MFRL=420,508;MMQ=60,60;MPOS=46;NALOD=1.53;NLOD=8.89;POPAF=6.00;RPA=14,13;RU=A;STR;STRQ=50;TLOD=35.33;ANN=T|intron_variant|MODIFIER|Xkr4|ENSMUSG00000051951|transcript|ENSMUST00000070533|protein_coding|2/2|c.998-84723delT||||||	GT:AD:AF:DP:F1R2:F2R1:SB	0/0:31,0:0.029:31:16,0:13,0:15,16,0,0	0/1:10,18:0.631:28:7,7:3,10:6,4,8,10	2985_T1
chr1	3304866	.	C	A	.	PASS	AS_FilterStatus=SITE;AS_SB_TABLE=17,26|0,4;DP=48;ECNT=1;GERMQ=89;MBQ=36,35;MFRL=435,468;MMQ=60,60;MPOS=49;NALOD=1.35;NLOD=6.32;POPAF=6.00;TLOD=10.40;ANN=A|intron_variant|MODIFIER|Xkr4|ENSMUSG00000051951|transcript|ENSMUST00000070533|protein_coding|2/2|c.998-87898G>T||||||	GT:AD:AF:DP:F1R2:F2R1:SB	0/0:21,0:0.043:21:8,0:13,0:8,13,0,0	0/1:22,4:0.179:26:15,2:7,2:9,13,0,4	2985_T1
chr1	3306160	.	A	C	.	PASS	AS_FilterStatus=SITE;AS_SB_TABLE=32,28|4,5;DP=72;ECNT=1;GERMQ=93;MBQ=34,32;MFRL=462,526;MMQ=60,60;MPOS=32;NALOD=1.54;NLOD=9.93;POPAF=6.00;TLOD=22.97;ANN=C|intron_variant|MODIFIER|Xkr4|ENSMUSG00000051951|transcript|ENSMUST00000070533|protein_coding|2/2|c.998-89192T>G||||||	GT:AD:AF:DP:F1R2:F2R1:SB	0/0:33,0:0.028:33:21,0:12,0:20,13,0,0	0/1:27,9:0.263:36:15,5:12,4:12,15,4,5	613_T1
chr1	3376610	.	GT	G	.	PASS	AS_FilterStatus=SITE;AS_SB_TABLE=22,24|3,2;DP=53;ECNT=1;GERMQ=93;MBQ=33,35;MFRL=429,395;MMQ=60,60;MPOS=51;NALOD=1.48;NLOD=8.72;POPAF=6.00;RPA=7,6;RU=T;STR;STRQ=93;TLOD=9.79;ANN=G|intron_variant|MODIFIER|Xkr4|ENSMUSG00000051951|transcript|ENSMUST00000070533|protein_coding|2/2|c.997+45091delA||||||	GT:AD:AF:DP:F1R2:F2R1:SB	0/0:29,0:0.032:29:14,0:13,0:14,15,0,0	0/1:17,5:0.249:22:6,2:10,3:8,9,3,2	3147_T1
chr1	3468178	.	G	A	.	PASS	AS_FilterStatus=SITE;AS_SB_TABLE=34,34|2,3;DP=74;ECNT=1;GERMQ=93;MBQ=29,36;MFRL=427,398;MMQ=60,60;MPOS=53;NALOD=1.61;NLOD=11.69;POPAF=6.00;TLOD=13.28;ANN=A|intron_variant|MODIFIER|Xkr4|ENSMUSG00000051951|transcript|ENSMUST00000070533|protein_coding|1/2|c.798-46277C>T||||||,A|intron_variant|MODIFIER|Gm1992|ENSMUSG00000089699|transcript|ENSMUST00000161581|antisense|1/1|n.101+1491G>A||||||	GT:AD:AF:DP:F1R2:F2R1:SB	0/0:39,0:0.024:39:17,0:21,0:19,20,0,0	0/1:29,5:0.171:34:14,3:15,2:15,14,2,3	2985_T1
chr1	3468309	.	CTT	C	.	PASS	AS_FilterStatus=SITE;AS_SB_TABLE=15,31|0,3;DP=62;ECNT=1;GERMQ=93;MBQ=34,26;MFRL=436,469;MMQ=60,60;MPOS=25;NALOD=1.29;NLOD=9.37;POPAF=6.00;RPA=13,11;RU=T;STR;STRQ=93;TLOD=5.99;ANN=C|intron_variant|MODIFIER|Xkr4|ENSMUSG00000051951|transcript|ENSMUST00000070533|protein_coding|1/2|c.798-46410_798-46409delAA||||||,C|intron_variant|MODIFIER|Gm1992|ENSMUSG00000089699|transcript|ENSMUST00000161581|antise…	GT:AD:AF:DP:F1R2:F2R1:SB	0/0:32,0:0.027:32:11,0:15,0:10,22,0,0	0/1:14,3:0.206:17:7,2:6,0:5,9,0,3	2985_T1
chr1	3556519	.	TAA	T	.	PASS	AS_FilterStatus=SITE;AS_SB_TABLE=19,24|3,2;DP=68;ECNT=1;GERMQ=85;MBQ=33,34;MFRL=413,383;MMQ=60,60;MPOS=25;NALOD=1.10;NLOD=5.27;POPAF=6.00;RPA=17,15;RU=A;STR;STRQ=93;TLOD=4.74;ANN=T|intron_variant|MODIFIER|Xkr4|ENSMUSG00000051951|transcript|ENSMUST00000070533|protein_coding|1/2|c.797+114031_797+114032delTT||||||	GT:AD:AF:DP:F1R2:F2R1:SB	0/0:18,0:0.042:18:6,0:2,0:9,9,0,0	0/1:25,5:0.183:30:5,4:11,1:10,15,3,2	613_T1
chr1	3614089	.	C	A	.	PASS	AS_FilterStatus=SITE;AS_SB_TABLE=24,24|2,4;DP=54;ECNT=1;GERMQ=93;MBQ=35,35;MFRL=434,502;MMQ=60,60;MPOS=55;NALOD=1.46;NLOD=8.29;POPAF=6.00;TLOD=16.97;ANN=A|intron_variant|MODIFIER|Xkr4|ENSMUSG00000051951|transcript|ENSMUST00000070533|protein_coding|1/2|c.797+56463G>T||||||	GT:AD:AF:DP:F1R2:F2R1:SB	0/0:28,0:0.034:28:12,0:12,0:18,10,0,0	0/1:20,6:0.250:26:11,2:8,4:6,14,2,4	2985_T1
chr1	3629848	.	C	T	.	PASS	AS_FilterStatus=SITE;AS_SB_TABLE=42,30|3,4;DP=80;ECNT=1;GERMQ=93;MBQ=35,34;MFRL=465,422;MMQ=60,60;MPOS=54;NALOD=1.63;NLOD=12.59;POPAF=6.00;TLOD=18.65;ANN=T|intron_variant|MODIFIER|Xkr4|ENSMUSG00000051951|transcript|ENSMUST00000070533|protein_coding|1/2|c.797+40704G>A||||||	GT:AD:AF:DP:F1R2:F2R1:SB	0/0:42,0:0.023:42:18,0:23,0:24,18,0,0	0/1:30,7:0.206:37:14,4:15,3:18,12,3,4	613_T1
chr1	3648524	.	AT	A	.	PASS	AS_FilterStatus=SITE;AS_SB_TABLE=21,25|5,10;DP=71;ECNT=1;GERMQ=93;MBQ=34,34;MFRL=415,408;MMQ=60,60;MPOS=51;NALOD=1.62;NLOD=11.08;POPAF=6.00;RPA=13,12;RU=T;STR;STRQ=30;TLOD=30.57;ANN=A|intron_variant|MODIFIER|Xkr4|ENSMUSG00000051951|transcript|ENSMUST00000070533|protein_coding|1/2|c.797+22027delA||||||	GT:AD:AF:DP:F1R2:F2R1:SB	0/0:37,0:0.024:37:13,0:24,0:16,21,0,0	0/1:9,15:0.615:24:6,7:3,7:5,4,5,10	2985_T1
chr1	3658216	.	TACAC	T	.	PASS	AS_FilterStatus=SITE;AS_SB_TABLE=21,6|6,0;DP=49;ECNT=1;GERMQ=45;MBQ=34,34;MFRL=476,444;MMQ=60,60;MPOS=18;NALOD=1.10;NLOD=5.01;POPAF=6.00;RPA=23,21;RU=AC;STR;STRQ=93;TLOD=22.01;ANN=T|intron_variant|MODIFIER|Xkr4|ENSMUSG00000051951|transcript|ENSMUST00000070533|protein_coding|1/2|c.797+12332_797+12335delGTGT||||||	GT:AD:AF:DP:F1R2:F2R1:SB	0/0:17,0:0.043:17:10,0:5,0:13,4,0,0	0/1:10,6:0.392:16:4,4:4,2:8,2,6,0	2985_T1
chr1	3663245	.	C	A	.	PASS	AS_FilterStatus=SITE;AS_SB_TABLE=40,36|7,2;DP=89;ECNT=1;GERMQ=93;MBQ=34,34;MFRL=466,429;MMQ=60,60;MPOS=29;NALOD=1.57;NLOD=10.84;POPAF=6.00;TLOD=24.47;ANN=A|intron_variant|MODIFIER|Xkr4|ENSMUSG00000051951|transcript|ENSMUST00000070533|protein_coding|1/2|c.797+7307G>T||||||	GT:AD:AF:DP:F1R2:F2R1:SB	0/0:37,0:0.026:37:20,0:17,0:17,20,0,0	0/1:39,9:0.204:48:17,6:22,3:23,16,7,2	2985_T1
chr1	3690911	.	TA	T	.	PASS	AS_FilterStatus=SITE;AS_SB_TABLE=29,40|2,2;DP=78;ECNT=1;GERMQ=93;MBQ=34,34;MFRL=415,411;MMQ=60,60;MPOS=35;NALOD=1.57;NLOD=10.22;POPAF=6.00;RPA=7,6;RU=A;STR;STRQ=93;TLOD=6.94;ANN=T|intergenic_region|MODIFIER|Xkr4-Gm22848|ENSMUSG00000051951-ENSMUSG00000088333|intergenic_region|ENSMUSG00000051951-ENSMUSG00000088333|||n.3690912delA||||||	GT:AD:AF:DP:F1R2:F2R1:SB	0/0:34,0:0.027:34:10,0:23,0:14,20,0,0	0/1:35,4:0.124:39:18,2:16,2:15,20,2,2	2985_T1
chr1	3764109	.	G	A	.	PASS	AS_FilterStatus=SITE;AS_SB_TABLE=23,28|2,4;DP=59;ECNT=1;GERMQ=93;MBQ=34,35;MFRL=483,471;MMQ=60,60;MPOS=45;NALOD=1.51;NLOD=9.28;POPAF=6.00;TLOD=16.79;ANN=A|intergenic_region|MODIFIER|Xkr4-Gm22848|ENSMUSG00000051951-ENSMUSG00000088333|intergenic_region|ENSMUSG00000051951-ENSMUSG00000088333|||n.3764109G>A||||||	GT:AD:AF:DP:F1R2:F2R1:SB	0/0:31,0:0.030:31:18,0:12,0:13,18,0,0	0/1:20,6:0.259:26:13,4:7,2:10,10,2,4	3147_T1
chr1	3773146	.	AT	A	.	PASS	AS_FilterStatus=SITE;AS_SB_TABLE=30,26|3,1;DP=64;ECNT=1;GERMQ=93;MBQ=34,34;MFRL=452,482;MMQ=60,60;MPOS=46;NALOD=1.46;NLOD=7.81;POPAF=6.00;RPA=5,4;RU=T;STR;STRQ=93;TLOD=6.93;ANN=A|intergenic_region|MODIFIER|Xkr4-Gm22848|ENSMUSG00000051951-ENSMUSG00000088333|intergenic_region|ENSMUSG00000051951-ENSMUSG00000088333|||n.3773147delT||||||	GT:AD:AF:DP:F1R2:F2R1:SB	0/0:26,0:0.034:26:21,0:5,0:13,13,0,0	0/1:30,4:0.142:34:12,3:18,1:17,13,3,1	2985_T1
chr1	3840835	.	ATT	A	.	PASS	AS_FilterStatus=SITE;AS_SB_TABLE=22,28|2,2;DP=61;ECNT=1;GERMQ=93;MBQ=34,34;MFRL=451,504;MMQ=60,60;MPOS=45;NALOD=1.27;NLOD=9.92;POPAF=6.00;RPA=13,11;RU=T;STR;STRQ=93;TLOD=6.57;ANN=A|intergenic_region|MODIFIER|Gm22848-Rp1|ENSMUSG00000088333-ENSMUSG00000025900|intergenic_region|ENSMUSG00000088333-ENSMUSG00000025900|||n.3840836_3840837delTT||||||	GT:AD:AF:DP:F1R2:F2R1:SB	0/0:33,0:0.027:33:22,0:10,0:15,18,0,0	0/1:17,4:0.212:21:6,3:11,1:7,10,2,2	2985_T1
chr1	3847792	.	G	A	.	PASS	AS_FilterStatus=SITE;AS_SB_TABLE=26,25|2,2;DP=56;ECNT=1;GERMQ=93;MBQ=33,34;MFRL=443,426;MMQ=40,40;MPOS=13;NALOD=1.44;NLOD=7.82;POPAF=6.00;TLOD=9.80;ANN=A|intergenic_region|MODIFIER|Gm22848-Rp1|ENSMUSG00000088333-ENSMUSG00000025900|intergenic_region|ENSMUSG00000088333-ENSMUSG00000025900|||n.3847792G>A||||||	GT:AD:AF:DP:F1R2:F2R1:SB	0/0:27,0:0.035:27:8,0:19,0:13,14,0,0	0/1:24,4:0.167:28:9,0:15,4:13,11,2,2	2985_T1
chr1	3882655	.	CAAA	C	.	PASS	AS_FilterStatus=SITE;AS_SB_TABLE=11,8|1,6;DP=37;ECNT=1;GERMQ=18;MBQ=33,29;MFRL=438,426;MMQ=60,60;MPOS=43;NALOD=0.433;NLOD=3.26;POPAF=6.00;RPA=25,22;RU=A;STR;STRQ=93;TLOD=6.83;ANN=C|intergenic_region|MODIFIER|Gm22848-Rp1|ENSMUSG00000088333-ENSMUSG00000025900|intergenic_region|ENSMUSG00000088333-ENSMUSG00000025900|||n.3882656_3882658delAAA||||||	GT:AD:AF:DP:F1R2:F2R1:SB	0/0:11,0:0.069:11:4,0:4,0:6,5,0,0	0/1:8,7:0.472:15:3,1:4,3:5,3,1,6	2985_T1
chr1	3928903	.	AT	A	.	PASS	AS_FilterStatus=SITE;AS_SB_TABLE=16,21|9,8;DP=65;ECNT=1;GERMQ=55;MBQ=34,35;MFRL=453,430;MMQ=60,60;MPOS=37;NALOD=1.39;NLOD=6.28;POPAF=6.00;RPA=15,14;RU=T;STR;STRQ=20;TLOD=29.86;ANN=A|intergenic_region|MODIFIER|Gm22848-Rp1|ENSMUSG00000088333-ENSMUSG00000025900|intergenic_region|ENSMUSG00000088333-ENSMUSG00000025900|||n.3928904delT||||||	GT:AD:AF:DP:F1R2:F2R1:SB	0/0:21,0:0.040:21:7,0:12,0:9,12,0,0	0/1:16,17:0.513:33:4,10:8,7:7,9,9,8	613_T1
chr1	3987126	.	AT	A	.	PASS	AS_FilterStatus=SITE;AS_SB_TABLE=28,24|1,4;DP=65;ECNT=1;GERMQ=93;MBQ=34,35;MFRL=472,431;MMQ=60,60;MPOS=50;NALOD=1.46;NLOD=7.51;POPAF=6.00;RPA=7,6;RU=T;STR;STRQ=93;TLOD=8.68;ANN=A|intergenic_region|MODIFIER|Gm22848-Rp1|ENSMUSG00000088333-ENSMUSG00000025900|intergenic_region|ENSMUSG00000088333-ENSMUSG00000025900|||n.3987127delT||||||	GT:AD:AF:DP:F1R2:F2R1:SB	0/0:25,0:0.034:25:9,0:16,0:12,13,0,0	0/1:27,5:0.175:32:16,1:9,4:16,11,1,4	613_T1
chr1	4127499	.	A	G	.	PASS	AS_FilterStatus=SITE;AS_SB_TABLE=26,31|4,4;DP=72;ECNT=1;GERMQ=93;MBQ=35,31;MFRL=424,434;MMQ=60,60;MPOS=27;NALOD=1.45;NLOD=7.78;POPAF=6.00;TLOD=19.03;ANN=G|intergenic_region|MODIFIER|Gm22848-Rp1|ENSMUSG00000088333-ENSMUSG00000025900|intergenic_region|ENSMUSG00000088333-ENSMUSG00000025900|||n.4127499A>G||||||	GT:AD:AF:DP:F1R2:F2R1:SB	0/0:26,0:0.034:26:10,0:15,0:11,15,0,0	0/1:31,8:0.230:39:12,2:19,6:15,16,4,4	2985_T1
chr1	4190761	.	CA	C	.	PASS	AS_FilterStatus=SITE;AS_SB_TABLE=31,14|5,1;DP=60;ECNT=1;GERMQ=93;MBQ=33,33;MFRL=443,441;MMQ=46,40;MPOS=55;NALOD=1.50;NLOD=8.41;POPAF=6.00;RPA=7,6;RU=A;STR;STRQ=93;TLOD=12.27;ANN=C|intergenic_region|MODIFIER|Gm22848-Rp1|ENSMUSG00000088333-ENSMUSG00000025900|intergenic_region|ENSMUSG00000088333-ENSMUSG00000025900|||n.4190762delA||||||	GT:AD:AF:DP:F1R2:F2R1:SB	0/0:28,0:0.031:28:16,0:11,0:19,9,0,0	0/1:17,6:0.278:23:7,4:9,2:12,5,5,1	613_T1
chr1	4235943	.	G	T	.	PASS	AS_FilterStatus=SITE;AS_SB_TABLE=24,23|2,4;DP=55;ECNT=1;GERMQ=93;MBQ=34,32;MFRL=447,389;MMQ=60,60;MPOS=59;NALOD=1.42;NLOD=7.22;POPAF=6.00;TLOD=13.39;ANN=T|intergenic_region|MODIFIER|Gm22848-Rp1|ENSMUSG00000088333-ENSMUSG00000025900|intergenic_region|ENSMUSG00000088333-ENSMUSG00000025900|||n.4235943G>T||||||	GT:AD:AF:DP:F1R2:F2R1:SB	0/0:24,0:0.037:24:15,0:9,0:14,10,0,0	0/1:23,6:0.200:29:14,2:9,4:10,13,2,4	2985_T1
chr1	4251495	.	A	C	.	PASS	AS_FilterStatus=SITE;AS_SB_TABLE=28,37|3,1;DP=69;ECNT=1;GERMQ=93;MBQ=34,31;MFRL=444,424;MMQ=60,60;MPOS=27;NALOD=1.49;NLOD=9.03;POPAF=6.00;TLOD=7.49;ANN=C|intergenic_region|MODIFIER|Gm22848-Rp1|ENSMUSG00000088333-ENSMUSG00000025900|intergenic_region|ENSMUSG00000088333-ENSMUSG00000025900|||n.4251495A>C||||||	GT:AD:AF:DP:F1R2:F2R1:SB	0/0:30,0:0.031:30:14,0:16,0:10,20,0,0	0/1:35,4:0.122:39:22,3:13,1:18,17,3,1	613_T1
chr1	4382618	.	TAA	T	.	PASS	AS_FilterStatus=SITE;AS_SB_TABLE=17,27|2,5;DP=60;ECNT=1;GERMQ=86;MBQ=33,34;MFRL=457,503;MMQ=60,60;MPOS=64;NALOD=1.24;NLOD=9.02;POPAF=6.00;RPA=13,11;RU=A;STR;STRQ=93;TLOD=16.44;ANN=T|intergenic_region|MODIFIER|Rp1-Sox17|ENSMUSG00000025900-ENSMUSG00000025902|intergenic_region|ENSMUSG00000025900-ENSMUSG00000025902|||n.4382619_4382620delAA||||||	GT:AD:AF:DP:F1R2:F2R1:SB	0/0:32,0:0.029:32:12,0:15,0:13,19,0,0	0/1:12,7:0.379:19:5,3:4,4:4,8,2,5	3147_T1
chr1	4499380	.	GA	G	.	PASS	AS_FilterStatus=SITE;AS_SB_TABLE=17,20|5,8;DP=61;ECNT=1;GERMQ=77;MBQ=34,33;MFRL=463,467;MMQ=60,60;MPOS=54;NALOD=1.50;NLOD=8.09;POPAF=6.00;RPA=12,11;RU=A;STR;STRQ=12;TLOD=28.71;ANN=G|upstream_gene_variant|MODIFIER|Sox17|ENSMUSG00000025902|transcript|ENSMUST00000027035|protein_coding||c.-4050delT|||||2968|,G|intergenic_region|MODIFIER|Sox17-Gm22307|ENSMUSG00000025902-ENSMUSG00000096126|intergenic_r…	GT:AD:AF:DP:F1R2:F2R1:SB	0/0:27,0:0.031:27:13,0:14,0:14,13,0,0	0/1:10,13:0.562:23:6,6:4,7:3,7,5,8	2985_T1
chr1	4594989	.	CAA	C	.	PASS	AS_FilterStatus=SITE;AS_SB_TABLE=13,12|0,4;DP=39;ECNT=1;GERMQ=49;MBQ=33,31;MFRL=423,524;MMQ=60,60;MPOS=41;NALOD=0.630;NLOD=4.45;POPAF=6.00;RPA=21,19;RU=A;STR;STRQ=93;TLOD=5.84;ANN=C|intergenic_region|MODIFIER|Gm22307-Gm6085|ENSMUSG00000096126-ENSMUSG00000098104|intergenic_region|ENSMUSG00000096126-ENSMUSG00000098104|||n.4594990_4594991delAA||||||	GT:AD:AF:DP:F1R2:F2R1:SB	0/0:15,0:0.055:15:3,0:6,0:7,8,0,0	0/1:10,4:0.328:14:5,1:3,3:6,4,0,4	613_T1
chr1	4596529	.	G	A	.	PASS	AS_FilterStatus=SITE;AS_SB_TABLE=33,36|3,2;DP=75;ECNT=1;GERMQ=93;MBQ=29,35;MFRL=480,497;MMQ=60,60;MPOS=22;NALOD=1.53;NLOD=9.83;POPAF=6.00;TLOD=12.25;ANN=A|intergenic_region|MODIFIER|Gm22307-Gm6085|ENSMUSG00000096126-ENSMUSG00000098104|intergenic_region|ENSMUSG00000096126-ENSMUSG00000098104|||n.4596529G>A||||||	GT:AD:AF:DP:F1R2:F2R1:SB	0/0:33,0:0.029:33:12,0:16,0:16,17,0,0	0/1:36,5:0.143:41:9,4:25,1:17,19,3,2	613_T1
chr1	4761115	.	ATTT	A	.	PASS	AS_FilterStatus=SITE;AS_SB_TABLE=15,10|4,3;DP=41;ECNT=2;GERMQ=40;MBQ=35,35;MFRL=397,377;MMQ=60,60;MPOS=29;NALOD=1.33;NLOD=5.34;POPAF=6.00;RPA=15,12;RU=T;STR;STRQ=93;TLOD=11.57;ANN=A|intergenic_region|MODIFIER|Gm25493-Mrpl15|ENSMUSG00000088000-ENSMUSG00000033845|intergenic_region|ENSMUSG00000088000-ENSMUSG00000033845|||n.4761116_4761118delTTT||||||	GT:AD:AF:DP:F1R2:F2R1:PGT:PID:PS:SB	0|0:18,0:0.046:18:4,0:10,0:0|1:4761115_ATTT_A:4761115:10,8,0,0	0|1:7,7:0.472:14:2,5:4,2:0|1:4761115_ATTT_A:4761115:5,2,4,3	613_T1
chr1	4761131	.	GTT	G	.	PASS	AS_FilterStatus=SITE;AS_SB_TABLE=15,10|4,4;DP=33;ECNT=2;GERMQ=46;MBQ=32,32;MFRL=397,395;MMQ=60,60;MPOS=14;NALOD=1.01;NLOD=5.24;POPAF=6.00;RPA=19,17;RU=T;STR;STRQ=93;TLOD=12.81;ANN=G|intergenic_region|MODIFIER|Gm25493-Mrpl15|ENSMUSG00000088000-ENSMUSG00000033845|intergenic_region|ENSMUSG00000088000-ENSMUSG00000033845|||n.4761132_4761133delTT||||||	GT:AD:AF:DP:F1R2:F2R1:PGT:PID:PS:SB	0|0:18,0:0.050:18:6,0:7,0:0|1:4761115_ATTT_A:4761115:10,8,0,0	0|1:7,8:0.504:15:2,5:4,2:0|1:4761115_ATTT_A:4761115:5,2,4,4	613_T1
chr1	4802933	.	T	C	.	PASS	AS_FilterStatus=SITE;AS_SB_TABLE=17,15|1,3;DP=38;ECNT=2;GERMQ=64;MBQ=34,28;MFRL=440,452;MMQ=60,60;MPOS=22;NALOD=1.07;NLOD=6.01;POPAF=6.00;TLOD=9.53;ANN=C|upstream_gene_variant|MODIFIER|Lypla1|ENSMUSG00000025903|transcript|ENSMUST00000027036|protein_coding||c.-4981T>C|||||4890|,C|intergenic_region|MODIFIER|Mrpl15-Lypla1|ENSMUSG00000033845-ENSMUSG00000025903|intergenic_region|ENSMUSG00000033845-ENS…	GT:AD:AF:DP:F1R2:F2R1:SB	0/0:20,0:0.043:20:6,0:13,0:8,12,0,0	0/1:12,4:0.275:16:7,1:5,2:9,3,1,3	3147_T1
chr1	4865849	.	CT	C	.	PASS	AS_FilterStatus=SITE;AS_SB_TABLE=28,32|4,2;DP=69;ECNT=1;GERMQ=93;MBQ=34,33;MFRL=430,433;MMQ=60,60;MPOS=46;NALOD=1.63;NLOD=12.02;POPAF=6.00;RPA=7,6;RU=T;STR;STRQ=93;TLOD=11.90;ANN=C|intron_variant|MODIFIER|Tcea1|ENSMUSG00000033813|transcript|ENSMUST00000165720|protein_coding|1/9|c.97-1614delT||||||INFO_REALIGN_3_PRIME,C|intragenic_variant|MODIFIER|Lypla1|ENSMUSG00000025903|gene_variant|ENSMUSG0000…	GT:AD:AF:DP:F1R2:F2R1:SB	0/0:40,0:0.023:40:15,0:20,0:19,21,0,0	0/1:20,6:0.249:26:12,3:8,2:9,11,4,2	2985_T1
chr1	4961901	.	C	T	.	PASS	AS_FilterStatus=SITE;AS_SB_TABLE=29,42|3,2;DP=78;ECNT=1;GERMQ=93;MBQ=36,35;MFRL=463,462;MMQ=60,60;MPOS=16;NALOD=1.67;NLOD=13.54;POPAF=6.00;TLOD=12.94;ANN=T|intron_variant|MODIFIER|Rgs20|ENSMUSG00000002459|transcript|ENSMUST00000118000|protein_coding|2/5|c.469-37912G>A||||||	GT:AD:AF:DP:F1R2:F2R1:SB	0/0:46,0:0.021:46:28,0:18,0:21,25,0,0	0/1:25,5:0.187:30:9,3:16,2:8,17,3,2	2985_T1
chr1	4999252	.	G	A	.	PASS	AS_FilterStatus=SITE;AS_SB_TABLE=23,29|3,5;DP=61;ECNT=1;GERMQ=93;MBQ=33,36;MFRL=421,469;MMQ=60,60;MPOS=55;NALOD=1.48;NLOD=8.68;POPAF=6.00;TLOD=24.01;ANN=A|intron_variant|MODIFIER|Rgs20|ENSMUSG00000002459|transcript|ENSMUST00000118000|protein_coding|2/5|c.468+21486C>T||||||	GT:AD:AF:DP:F1R2:F2R1:SB	0/0:29,0:0.032:29:17,0:11,0:15,14,0,0	0/1:23,8:0.273:31:15,2:8,6:8,15,3,5	2985_T1
chr1	5000610	.	CA	C	.	PASS	AS_FilterStatus=SITE;AS_SB_TABLE=31,34|4,8;DP=81;ECNT=1;GERMQ=93;MBQ=35,36;MFRL=432,420;MMQ=60,60;MPOS=53;NALOD=1.62;NLOD=11.72;POPAF=6.00;RPA=7,6;RU=A;STR;STRQ=93;TLOD=26.38;ANN=C|intron_variant|MODIFIER|Rgs20|ENSMUSG00000002459|transcript|ENSMUST00000118000|protein_coding|2/5|c.468+20127delT||||||	GT:AD:AF:DP:F1R2:F2R1:SB	0/0:39,0:0.024:39:19,0:19,0:18,21,0,0	0/1:26,12:0.325:38:9,5:17,7:13,13,4,8	2985_T1
chr1	5011962	.	C	T	.	PASS	AS_FilterStatus=SITE;AS_SB_TABLE=5,26|1,2;DP=36;ECNT=1;GERMQ=61;MBQ=35,35;MFRL=472,373;MMQ=60,60;MPOS=40;NALOD=1.21;NLOD=4.46;POPAF=6.00;TLOD=7.72;ANN=T|intron_variant|MODIFIER|Rgs20|ENSMUSG00000002459|transcript|ENSMUST00000118000|protein_coding|2/5|c.468+8776G>A||||||	GT:AD:AF:DP:F1R2:F2R1:SB	0/0:15,0:0.058:15:3,0:10,0:4,11,0,0	0/1:16,3:0.190:19:5,0:10,3:1,15,1,2	3147_T1
chr1	5042015	.	CTT	C	.	PASS	AS_FilterStatus=SITE;AS_SB_TABLE=11,19|3,3;DP=43;ECNT=1;GERMQ=60;MBQ=32,34;MFRL=433,527;MMQ=60,60;MPOS=59;NALOD=1.38;NLOD=6.30;POPAF=6.00;RPA=18,16;RU=T;STR;STRQ=93;TLOD=15.88;ANN=C|intron_variant|MODIFIER|Rgs20|ENSMUSG00000002459|transcript|ENSMUST00000118000|protein_coding|1/5|c.169-20980_169-20979delAA||||||	GT:AD:AF:DP:F1R2:F2R1:SB	0/0:21,0:0.040:21:7,0:10,0:8,13,0,0	0/1:9,6:0.409:15:2,2:6,4:3,6,3,3	613_T1
chr1	5139388	.	A	G	.	PASS	AS_FilterStatus=SITE;AS_SB_TABLE=11,17|3,0;DP=34;ECNT=2;GERMQ=51;MBQ=36,35;MFRL=410,443;MMQ=60,60;MPOS=3;NALOD=1.09;NLOD=2.97;POPAF=6.00;TLOD=5.68;ANN=G|intron_variant|MODIFIER|Atp6v1h|ENSMUSG00000033793|transcript|ENSMUST00000044369|protein_coding|11/13|c.1175+3451A>G||||||	GT:AD:AF:DP:F1R2:F2R1:PGT:PID:PS:SB	0|0:10,0:0.077:10:5,0:3,0:0|1:5139388_A_G:5139388:2,8,0,0	0|1:18,3:0.169:21:8,2:8,1:0|1:5139388_A_G:5139388:9,9,3,0	2985_T1
chr1	5184192	.	GT	G	.	PASS	AS_FilterStatus=SITE;AS_SB_TABLE=18,25|9,5;DP=65;ECNT=1;GERMQ=75;MBQ=28,28;MFRL=409,443;MMQ=60,60;MPOS=34;NALOD=0.931;NLOD=8.18;POPAF=6.00;RPA=14,13;RU=T;STR;STRQ=4;TLOD=16.96;ANN=G|intergenic_region|MODIFIER|Atp6v1h-Oprk1|ENSMUSG00000033793-ENSMUSG00000025905|intergenic_region|ENSMUSG00000033793-ENSMUSG00000025905|||n.5184193delT||||||	GT:AD:AF:DP:F1R2:F2R1:SB	0/0:28,0:0.032:28:9,0:10,0:12,16,0,0	0/1:15,14:0.470:29:6,5:2,5:6,9,9,5	613_T1
chr1	5232765	.	GTT	G	.	PASS	AS_FilterStatus=SITE;AS_SB_TABLE=10,13|4,5;DP=48;ECNT=1;GERMQ=28;MBQ=20,27;MFRL=478,447;MMQ=60,60;MPOS=14;NALOD=0.741;NLOD=3.36;POPAF=6.00;RPA=18,16;RU=T;STR;STRQ=93;TLOD=15.93;ANN=G|intergenic_region|MODIFIER|Atp6v1h-Oprk1|ENSMUSG00000033793-ENSMUSG00000025905|intergenic_region|ENSMUSG00000033793-ENSMUSG00000025905|||n.5232766_5232767delTT||||||	GT:AD:AF:DP:F1R2:F2R1:SB	0/0:12,0:0.060:12:0,0:5,0:3,9,0,0	0/1:11,9:0.476:20:4,1:2,6:7,4,4,5	613_T1
chr1	5237684	.	CAA	C	.	PASS	AS_FilterStatus=SITE;AS_SB_TABLE=18,21|2,3;DP=60;ECNT=1;GERMQ=78;MBQ=34,36;MFRL=439,318;MMQ=60,60;MPOS=51;NALOD=1.23;NLOD=6.95;POPAF=6.00;RPA=16,14;RU=A;STR;STRQ=93;TLOD=8.41;ANN=C|intergenic_region|MODIFIER|Atp6v1h-Oprk1|ENSMUSG00000033793-ENSMUSG00000025905|intergenic_region|ENSMUSG00000033793-ENSMUSG00000025905|||n.5237685_5237686delAA||||||	GT:AD:AF:DP:F1R2:F2R1:SB	0/0:24,0:0.034:24:10,0:12,0:11,13,0,0	0/1:15,5:0.269:20:8,2:4,3:7,8,2,3	3147_T1
chr1	5285530	.	AT	A	.	PASS	AS_FilterStatus=SITE;AS_SB_TABLE=30,36|6,7;DP=90;ECNT=1;GERMQ=93;MBQ=34,34;MFRL=424,437;MMQ=60,60;MPOS=49;NALOD=1.65;NLOD=11.71;POPAF=6.00;RPA=7,6;RU=T;STR;STRQ=93;TLOD=29.12;ANN=A|intergenic_region|MODIFIER|Atp6v1h-Oprk1|ENSMUSG00000033793-ENSMUSG00000025905|intergenic_region|ENSMUSG00000033793-ENSMUSG00000025905|||n.5285531delT||||||	GT:AD:AF:DP:F1R2:F2R1:SB	0/0:40,0:0.023:40:18,0:22,0:20,20,0,0	0/1:26,13:0.350:39:13,4:13,9:10,16,6,7	2985_T1
chr1	5558906	.	A	G	.	PASS	AS_FilterStatus=SITE;AS_SB_TABLE=30,36|1,2;DP=71;ECNT=1;GERMQ=93;MBQ=34,33;MFRL=430,393;MMQ=60,60;MPOS=25;NALOD=1.61;NLOD=11.74;POPAF=6.00;TLOD=6.60;ANN=G|intergenic_region|MODIFIER|Atp6v1h-Oprk1|ENSMUSG00000033793-ENSMUSG00000025905|intergenic_region|ENSMUSG00000033793-ENSMUSG00000025905|||n.5558906A>G||||||	GT:AD:AF:DP:F1R2:F2R1:SB	0/0:39,0:0.024:39:18,0:21,0:14,25,0,0	0/1:27,3:0.129:30:14,2:12,1:16,11,1,2	613_T1
chr1	5634253	.	G	A	.	PASS	AS_FilterStatus=SITE;AS_SB_TABLE=33,31|11,2;DP=79;ECNT=1;GERMQ=93;MBQ=35,33;MFRL=413,352;MMQ=60,60;MPOS=45;NALOD=1.62;NLOD=12.34;POPAF=6.00;TLOD=36.40;ANN=A|intergenic_region|MODIFIER|Oprk1-Gm22463|ENSMUSG00000025905-ENSMUSG00000093015|intergenic_region|ENSMUSG00000025905-ENSMUSG00000093015|||n.5634253G>A||||||	GT:AD:AF:DP:F1R2:F2R1:SB	0/0:42,0:0.023:42:19,0:23,0:20,22,0,0	0/1:22,13:0.361:35:9,7:13,6:13,9,11,2	2985_T1
chr1	5707078	.	C	A	.	PASS	AS_FilterStatus=SITE;AS_SB_TABLE=25,21|1,4;DP=53;ECNT=1;GERMQ=93;MBQ=34,34;MFRL=451,399;MMQ=60,60;MPOS=26;NALOD=1.41;NLOD=7.43;POPAF=6.00;TLOD=12.92;ANN=A|intergenic_region|MODIFIER|Gm22463-Npbwr1|ENSMUSG00000093015-ENSMUSG00000033774|intergenic_region|ENSMUSG00000093015-ENSMUSG00000033774|||n.5707078C>A||||||	GT:AD:AF:DP:F1R2:F2R1:SB	0/0:25,0:0.037:25:10,0:13,0:13,12,0,0	0/1:21,5:0.214:26:8,1:13,4:12,9,1,4	2985_T1
chr1	5714618	.	A	G	.	PASS	AS_FilterStatus=SITE;AS_SB_TABLE=31,44|3,3;DP=81;ECNT=1;GERMQ=93;MBQ=35,33;MFRL=434,550;MMQ=60,60;MPOS=19;NALOD=1.61;NLOD=11.99;POPAF=6.00;TLOD=14.68;ANN=G|intergenic_region|MODIFIER|Gm22463-Npbwr1|ENSMUSG00000093015-ENSMUSG00000033774|intergenic_region|ENSMUSG00000093015-ENSMUSG00000033774|||n.5714618A>G||||||	GT:AD:AF:DP:F1R2:F2R1:SB	0/0:40,0:0.024:40:21,0:18,0:17,23,0,0	0/1:35,6:0.167:41:19,3:15,3:14,21,3,3	613_T1
chr1	5760223	.	TA	T	.	PASS	AS_FilterStatus=SITE;AS_SB_TABLE=14,11|5,6;DP=41;ECNT=1;GERMQ=55;MBQ=33,32;MFRL=451,464;MMQ=60,60;MPOS=29;NALOD=0.916;NLOD=5.93;POPAF=6.00;RPA=15,14;RU=A;STR;STRQ=11;TLOD=24.48;ANN=T|intergenic_region|MODIFIER|Gm22463-Npbwr1|ENSMUSG00000093015-ENSMUSG00000033774|intergenic_region|ENSMUSG00000093015-ENSMUSG00000033774|||n.5760224delA||||||	GT:AD:AF:DP:F1R2:F2R1:SB	0/0:20,0:0.042:20:5,0:11,0:12,8,0,0	0/1:5,11:0.679:16:3,3:1,5:2,3,5,6	3147_T1
chr1	5782260	.	G	T	.	PASS	AS_FilterStatus=SITE;AS_SB_TABLE=31,29|2,2;DP=65;ECNT=1;GERMQ=93;MBQ=35,34;MFRL=430,399;MMQ=60,60;MPOS=9;NALOD=1.53;NLOD=9.89;POPAF=6.00;TLOD=9.30;ANN=T|intergenic_region|MODIFIER|Gm22463-Npbwr1|ENSMUSG00000093015-ENSMUSG00000033774|intergenic_region|ENSMUSG00000093015-ENSMUSG00000033774|||n.5782260G>T||||||	GT:AD:AF:DP:F1R2:F2R1:SB	0/0:33,0:0.029:33:13,0:19,0:19,14,0,0	0/1:27,4:0.151:31:11,1:16,3:12,15,2,2	2985_T1
chr1	5796448	.	G	T	.	PASS	AS_FilterStatus=SITE;AS_SB_TABLE=27,31|2,4;DP=66;ECNT=1;GERMQ=93;MBQ=34,33;MFRL=447,462;MMQ=60,60;MPOS=14;NALOD=1.59;NLOD=11.04;POPAF=6.00;TLOD=15.96;ANN=T|intergenic_region|MODIFIER|Gm22463-Npbwr1|ENSMUSG00000093015-ENSMUSG00000033774|intergenic_region|ENSMUSG00000093015-ENSMUSG00000033774|||n.5796448G>T||||||	GT:AD:AF:DP:F1R2:F2R1:SB	0/0:37,0:0.025:37:19,0:16,0:22,15,0,0	0/1:21,6:0.242:27:8,4:12,2:5,16,2,4	2985_T1
chr1	5896798	.	CTT	C	.	PASS	AS_FilterStatus=SITE;AS_SB_TABLE=29,17|4,3;DP=65;ECNT=1;GERMQ=89;MBQ=32,32;MFRL=432,417;MMQ=60,60;MPOS=19;NALOD=1.02;NLOD=7.21;POPAF=6.00;RPA=18,16;RU=T;STR;STRQ=93;TLOD=7.84;ANN=C|intergenic_region|MODIFIER|Gm22463-Npbwr1|ENSMUSG00000093015-ENSMUSG00000033774|intergenic_region|ENSMUSG00000093015-ENSMUSG00000033774|||n.5896799_5896800delTT||||||	GT:AD:AF:DP:F1R2:F2R1:SB	0/0:24,0:0.034:24:17,0:6,0:15,9,0,0	0/1:22,7:0.236:29:10,2:9,5:14,8,4,3	613_T1
chr1	5903497	.	A	G	.	PASS	AS_FilterStatus=SITE;AS_SB_TABLE=31,38|2,5;DP=77;ECNT=1;GERMQ=93;MBQ=35,34;MFRL=443,591;MMQ=60,60;MPOS=55;NALOD=1.66;NLOD=13.24;POPAF=6.00;TLOD=19.06;ANN=G|intergenic_region|MODIFIER|Gm22463-Npbwr1|ENSMUSG00000093015-ENSMUSG00000033774|intergenic_region|ENSMUSG00000093015-ENSMUSG00000033774|||n.5903497A>G||||||	GT:AD:AF:DP:F1R2:F2R1:SB	0/0:44,0:0.022:44:26,0:18,0:20,24,0,0	0/1:25,7:0.235:32:10,2:15,5:11,14,2,5	2985_T1
chr1	5942490	.	CAA	C	.	PASS	AS_FilterStatus=SITE;AS_SB_TABLE=14,16|3,8;DP=58;ECNT=1;GERMQ=53;MBQ=34,36;MFRL=414,365;MMQ=60,60;MPOS=62;NALOD=0.873;NLOD=5.97;POPAF=6.00;RPA=16,14;RU=A;STR;STRQ=93;TLOD=25.15;ANN=C|intergenic_region|MODIFIER|Npbwr1-Rb1cc1|ENSMUSG00000033774-ENSMUSG00000025907|intergenic_region|ENSMUSG00000033774-ENSMUSG00000025907|||n.5942491_5942492delAA||||||	GT:AD:AF:DP:F1R2:F2R1:SB	0/0:20,0:0.038:20:8,0:6,0:8,12,0,0	0/1:10,11:0.523:21:3,4:3,6:6,4,3,8	2985_T1
chr1	6005042	.	G	T	.	PASS	AS_FilterStatus=SITE;AS_SB_TABLE=25,25|3,2;DP=57;ECNT=1;GERMQ=93;MBQ=34,34;MFRL=449,524;MMQ=60,60;MPOS=15;NALOD=1.39;NLOD=6.92;POPAF=6.00;TLOD=12.63;ANN=T|intergenic_region|MODIFIER|Npbwr1-Rb1cc1|ENSMUSG00000033774-ENSMUSG00000025907|intergenic_region|ENSMUSG00000033774-ENSMUSG00000025907|||n.6005042G>T||||||	GT:AD:AF:DP:F1R2:F2R1:SB	0/0:23,0:0.039:23:13,0:10,0:11,12,0,0	0/1:27,5:0.187:32:14,5:12,0:14,13,3,2	2985_T1
chr1	6052928	.	C	T	.	PASS	AS_FilterStatus=SITE;AS_SB_TABLE=23,26|5,1;DP=58;ECNT=1;GERMQ=93;MBQ=29,35;MFRL=460,477;MMQ=60,60;MPOS=42;NALOD=1.43;NLOD=7.52;POPAF=6.00;TLOD=17.03;ANN=T|intergenic_region|MODIFIER|Npbwr1-Rb1cc1|ENSMUSG00000033774-ENSMUSG00000025907|intergenic_region|ENSMUSG00000033774-ENSMUSG00000025907|||n.6052928C>T||||||	GT:AD:AF:DP:F1R2:F2R1:SB	0/0:25,0:0.036:25:11,0:14,0:14,11,0,0	0/1:24,6:0.219:30:11,5:12,1:9,15,5,1	613_T1
chr1	6054652	.	TC	T	.	PASS	AS_FilterStatus=SITE;AS_SB_TABLE=3,17|6,12;DP=45;ECNT=1;GERMQ=23;MBQ=36,35;MFRL=448,428;MMQ=60,60;MPOS=37;NALOD=1.17;NLOD=2.99;POPAF=6.00;RPA=11,10;RU=C;STR;STRQ=44;TLOD=35.15;ANN=T|intergenic_region|MODIFIER|Npbwr1-Rb1cc1|ENSMUSG00000033774-ENSMUSG00000025907|intergenic_region|ENSMUSG00000033774-ENSMUSG00000025907|||n.6054653delC||||||	GT:AD:AF:DP:F1R2:F2R1:SB	0/0:10,0:0.068:10:4,0:5,0:3,7,0,0	0/1:10,18:0.608:28:2,7:7,9:0,10,6,12	613_T1
chr1	6077183	.	GGAGA	G	.	PASS	AS_FilterStatus=SITE;AS_SB_TABLE=13,14|3,2;DP=54;ECNT=1;GERMQ=50;MBQ=35,35;MFRL=449,452;MMQ=60,60;MPOS=57;NALOD=1.13;NLOD=5.34;POPAF=6.00;RPA=22,20;RU=GA;STR;STRQ=93;TLOD=12.06;ANN=G|intergenic_region|MODIFIER|Npbwr1-Rb1cc1|ENSMUSG00000033774-ENSMUSG00000025907|intergenic_region|ENSMUSG00000033774-ENSMUSG00000025907|||n.6077184_6077187delGAGA||||||	GT:AD:AF:DP:F1R2:F2R1:SB	0/0:18,0:0.041:18:11,0:6,0:10,8,0,0	0/1:9,5:0.376:14:3,2:6,3:3,6,3,2	2985_T1
chr1	6108973	.	C	T	.	PASS	AS_FilterStatus=SITE;AS_SB_TABLE=38,36|2,2;DP=79;ECNT=1;GERMQ=93;MBQ=33,36;MFRL=419,474;MMQ=60,60;MPOS=25;NALOD=1.59;NLOD=11.44;POPAF=6.00;TLOD=7.01;ANN=T|intergenic_region|MODIFIER|Npbwr1-Rb1cc1|ENSMUSG00000033774-ENSMUSG00000025907|intergenic_region|ENSMUSG00000033774-ENSMUSG00000025907|||n.6108973C>T||||||	GT:AD:AF:DP:F1R2:F2R1:SB	0/0:41,0:0.025:41:20,0:21,0:19,22,0,0	0/1:33,4:0.119:37:14,2:18,1:19,14,2,2	613_T1
chr1	6150695	.	G	T	.	PASS	AS_FilterStatus=SITE;AS_SB_TABLE=19,14|0,3;DP=40;ECNT=1;GERMQ=65;MBQ=36,34;MFRL=385,513;MMQ=40,37;MPOS=32;NALOD=1.22;NLOD=4.51;POPAF=6.00;TLOD=5.42;ANN=T|intergenic_region|MODIFIER|Npbwr1-Rb1cc1|ENSMUSG00000033774-ENSMUSG00000025907|intergenic_region|ENSMUSG00000033774-ENSMUSG00000025907|||n.6150695G>T||||||	GT:AD:AF:DP:F1R2:F2R1:SB	0/0:16,0:0.058:16:7,0:9,0:9,7,0,0	0/1:17,3:0.188:20:11,1:6,2:10,7,0,3	2985_T1
chr1	6197182	.	G	T	.	PASS	AS_FilterStatus=SITE;AS_SB_TABLE=30,21|2,4;DP=58;ECNT=1;GERMQ=93;MBQ=35,34;MFRL=447,377;MMQ=60,60;MPOS=6;NALOD=1.52;NLOD=9.33;POPAF=6.00;TLOD=13.69;ANN=T|intergenic_region|MODIFIER|Npbwr1-Rb1cc1|ENSMUSG00000033774-ENSMUSG00000025907|intergenic_region|ENSMUSG00000033774-ENSMUSG00000025907|||n.6197182G>T||||||	GT:AD:AF:DP:F1R2:F2R1:SB	0/0:32,0:0.030:32:18,0:14,0:18,14,0,0	0/1:19,6:0.250:25:10,1:9,4:12,7,2,4	2985_T1
chr1	6228919	.	G	C	.	PASS	AS_FilterStatus=SITE;AS_SB_TABLE=30,24|3,1;DP=58;ECNT=1;GERMQ=93;MBQ=35,33;MFRL=441,441;MMQ=60,60;MPOS=45;NALOD=1.41;NLOD=7.52;POPAF=6.00;TLOD=8.72;ANN=C|intron_variant|MODIFIER|Rb1cc1|ENSMUSG00000025907|transcript|ENSMUST00000027040|protein_coding|2/23|c.-45+870G>C||||||	GT:AD:AF:DP:F1R2:F2R1:SB	0/0:25,0:0.037:25:15,0:10,0:12,13,0,0	0/1:29,4:0.143:33:14,2:14,2:18,11,3,1	613_T1
chr1	6246585	.	GT	G	.	PASS	AS_FilterStatus=SITE;AS_SB_TABLE=27,17|12,7;DP=80;ECNT=1;GERMQ=65;MBQ=35,35;MFRL=439,435;MMQ=60,60;MPOS=30;NALOD=1.49;NLOD=7.18;POPAF=6.00;RPA=14,13;RU=T;STR;STRQ=24;TLOD=33.81;ANN=G|intron_variant|MODIFIER|Rb1cc1|ENSMUSG00000025907|transcript|ENSMUST00000027040|protein_coding|12/23|c.1686+940delT||||||INFO_REALIGN_3_PRIME	GT:AD:AF:DP:F1R2:F2R1:SB	0/0:24,0:0.033:24:7,0:13,0:18,6,0,0	0/1:20,19:0.483:39:7,10:8,6:9,11,12,7	613_T1
chr1	6304256	.	GA	G	.	PASS	AS_FilterStatus=SITE;AS_SB_TABLE=22,22|1,6;DP=56;ECNT=1;GERMQ=91;MBQ=33,33;MFRL=400,497;MMQ=60,60;MPOS=55;NALOD=1.53;NLOD=9.31;POPAF=6.00;RPA=7,6;RU=A;STR;STRQ=93;TLOD=15.79;ANN=G|intergenic_region|MODIFIER|Rb1cc1-Fam150a|ENSMUSG00000025907-ENSMUSG00000087247|intergenic_region|ENSMUSG00000025907-ENSMUSG00000087247|||n.6304257delA||||||	GT:AD:AF:DP:F1R2:F2R1:SB	0/0:31,0:0.029:31:15,0:15,0:16,15,0,0	0/1:13,7:0.381:20:7,4:6,2:6,7,1,6	3147_T1
chr1	6427583	.	G	A	.	PASS	AS_FilterStatus=SITE;AS_SB_TABLE=26,26|4,2;DP=61;ECNT=1;GERMQ=93;MBQ=35,35;MFRL=451,464;MMQ=60,60;MPOS=37;NALOD=1.50;NLOD=8.98;POPAF=6.00;TLOD=16.72;ANN=A|intergenic_region|MODIFIER|Fam150a-St18|ENSMUSG00000087247-ENSMUSG00000033740|intergenic_region|ENSMUSG00000087247-ENSMUSG00000033740|||n.6427583G>A||||||	GT:AD:AF:DP:F1R2:F2R1:SB	0/0:30,0:0.031:30:21,0:8,0:14,16,0,0	0/1:22,6:0.234:28:9,1:12,5:12,10,4,2	3147_T1
chr1	6483885	.	C	T	.	PASS	AS_FilterStatus=SITE;AS_SB_TABLE=30,33|3,4;DP=73;ECNT=1;GERMQ=93;MBQ=35,35;MFRL=449,515;MMQ=60,60;MPOS=46;NALOD=1.55;NLOD=10.23;POPAF=6.00;TLOD=19.54;ANN=T|intergenic_region|MODIFIER|Fam150a-St18|ENSMUSG00000087247-ENSMUSG00000033740|intergenic_region|ENSMUSG00000087247-ENSMUSG00000033740|||n.6483885C>T||||||	GT:AD:AF:DP:F1R2:F2R1:SB	0/0:34,0:0.027:34:12,0:22,0:13,21,0,0	0/1:29,7:0.210:36:11,4:18,3:17,12,3,4	613_T1
chr1	6497534	.	C	A	.	PASS	AS_FilterStatus=SITE;AS_SB_TABLE=28,31|5,3;DP=70;ECNT=1;GERMQ=93;MBQ=35,35;MFRL=443,489;MMQ=60,60;MPOS=47;NALOD=1.60;NLOD=11.43;POPAF=6.00;TLOD=23.47;ANN=A|intragenic_variant|MODIFIER|St18|ENSMUSG00000033740|gene_variant|ENSMUSG00000033740|||n.6497534C>A||||||	GT:AD:AF:DP:F1R2:F2R1:SB	0/0:39,0:0.025:39:18,0:20,0:16,23,0,0	0/1:20,8:0.301:28:7,1:12,7:12,8,5,3	2985_T1
chr1	6518871	.	C	A	.	PASS	AS_FilterStatus=SITE;AS_SB_TABLE=23,24|3,3;DP=53;ECNT=1;GERMQ=88;MBQ=32,34;MFRL=417,469;MMQ=60,60;MPOS=31;NALOD=1.45;NLOD=7.76;POPAF=6.00;TLOD=12.99;ANN=A|intragenic_variant|MODIFIER|St18|ENSMUSG00000033740|gene_variant|ENSMUSG00000033740|||n.6518871C>A||||||	GT:AD:AF:DP:F1R2:F2R1:SB	0/0:28,0:0.035:28:9,0:9,0:11,17,0,0	0/1:19,6:0.258:25:6,4:5,1:12,7,3,3	3147_T1
chr1	6530912	.	GTT	G	.	PASS	AS_FilterStatus=SITE;AS_SB_TABLE=13,15|6,4;DP=46;ECNT=1;GERMQ=67;MBQ=33,36;MFRL=444,394;MMQ=60,60;MPOS=47;NALOD=1.15;NLOD=7.07;POPAF=6.00;RPA=16,14;RU=T;STR;STRQ=93;TLOD=30.81;ANN=G|intragenic_variant|MODIFIER|St18|ENSMUSG00000033740|gene_variant|ENSMUSG00000033740|||n.6530927_6530928delTT||||||	GT:AD:AF:DP:F1R2:F2R1:SB	0/0:24,0:0.035:24:4,0:10,0:11,13,0,0	0/1:4,10:0.730:14:2,2:2,6:2,2,6,4	2985_T1
chr1	6562575	.	A	T	.	PASS	AS_FilterStatus=SITE;AS_SB_TABLE=18,24|2,1;DP=47;ECNT=1;GERMQ=87;MBQ=35,35;MFRL=445,435;MMQ=60,60;MPOS=63;NALOD=1.35;NLOD=6.32;POPAF=6.00;TLOD=7.27;ANN=T|intragenic_variant|MODIFIER|St18|ENSMUSG00000033740|gene_variant|ENSMUSG00000033740|||n.6562575A>T||||||	GT:AD:AF:DP:F1R2:F2R1:SB	0/0:23,0:0.043:23:13,0:10,0:9,14,0,0	0/1:19,3:0.166:22:11,2:8,1:9,10,2,1	2985_T1
chr1	6589541	.	GTT	G	.	PASS	AS_FilterStatus=SITE;AS_SB_TABLE=11,20|2,2;DP=47;ECNT=1;GERMQ=64;MBQ=33,21;MFRL=431,312;MMQ=60,60;MPOS=47;NALOD=1.38;NLOD=5.99;POPAF=6.00;RPA=16,14;RU=T;STR;STRQ=93;TLOD=6.59;ANN=G|intragenic_variant|MODIFIER|St18|ENSMUSG00000033740|gene_variant|ENSMUSG00000033740|||n.6589556_6589557delTT||||||	GT:AD:AF:DP:F1R2:F2R1:SB	0/0:20,0:0.041:20:7,0:3,0:7,13,0,0	0/1:11,4:0.243:15:4,1:4,2:4,7,2,2	3147_T1
chr1	6622556	.	CA	C	.	PASS	AS_FilterStatus=SITE;AS_SB_TABLE=20,13|7,3;DP=54;ECNT=1;GERMQ=78;MBQ=34,33;MFRL=435,439;MMQ=60,60;MPOS=48;NALOD=1.50;NLOD=8.08;POPAF=6.00;RPA=15,14;RU=A;STR;STRQ=4;TLOD=17.46;ANN=C|intragenic_variant|MODIFIER|St18|ENSMUSG00000033740|gene_variant|ENSMUSG00000033740|||n.6622571delA||||||	GT:AD:AF:DP:F1R2:F2R1:SB	0/0:27,0:0.031:27:17,0:10,0:17,10,0,0	0/1:6,10:0.592:16:1,5:4,5:3,3,7,3	2985_T1
chr1	6663681	.	C	A	.	PASS	AS_FilterStatus=SITE;AS_SB_TABLE=30,31|3,4;DP=68;ECNT=2;GERMQ=93;MBQ=34,35;MFRL=438,350;MMQ=60,60;MPOS=48;NALOD=1.54;NLOD=10.19;POPAF=6.00;TLOD=20.20;ANN=A|intragenic_variant|MODIFIER|St18|ENSMUSG00000033740|gene_variant|ENSMUSG00000033740|||n.6663681C>A||||||	GT:AD:AF:DP:F1R2:F2R1:SB	0/0:35,0:0.028:35:17,0:17,0:18,17,0,0	0/1:26,7:0.229:33:7,2:19,5:12,14,3,4	2985_T1
chr1	6727048	.	CA	C	.	PASS	AS_FilterStatus=SITE;AS_SB_TABLE=30,24|4,3;DP=62;ECNT=1;GERMQ=93;MBQ=34,34;MFRL=459,423;MMQ=60,60;MPOS=41;NALOD=1.45;NLOD=8.12;POPAF=6.00;RPA=6,5;RU=A;STR;STRQ=93;TLOD=11.08;ANN=C|upstream_gene_variant|MODIFIER|St18|ENSMUSG00000033740|transcript|ENSMUST00000043578|protein_coding||c.-3386delA|||||3002|,C|intragenic_variant|MODIFIER|St18|ENSMUSG00000033740|gene_variant|ENSMUSG00000033740|||n.672705…	GT:AD:AF:DP:F1R2:F2R1:SB	0/0:28,0:0.034:28:17,0:11,0:15,13,0,0	0/1:26,7:0.211:33:11,1:14,6:15,11,4,3	3147_T1
chr1	6730820	.	TA	T	.	PASS	AS_FilterStatus=SITE;AS_SB_TABLE=28,53|3,3;DP=93;ECNT=1;GERMQ=93;MBQ=34,35;MFRL=439,407;MMQ=60,60;MPOS=22;NALOD=1.73;NLOD=14.41;POPAF=6.00;RPA=7,6;RU=A;STR;STRQ=93;TLOD=10.66;ANN=T|intron_variant|MODIFIER|St18|ENSMUSG00000033740|transcript|ENSMUST00000043578|protein_coding|1/23|c.-195+587delA||||||INFO_REALIGN_3_PRIME	GT:AD:AF:DP:F1R2:F2R1:SB	0/0:48,0:0.019:48:25,0:23,0:14,34,0,0	0/1:33,6:0.174:39:17,4:15,2:14,19,3,3	613_T1
chr1	6917070	.	G	A	.	PASS	AS_FilterStatus=SITE;AS_SB_TABLE=11,26|2,1;DP=40;ECNT=2;GERMQ=77;MBQ=32,20;MFRL=406,123;MMQ=40,60;MPOS=5;NALOD=1.26;NLOD=5.12;POPAF=6.00;TLOD=9.77;ANN=A|intergenic_region|MODIFIER|St18-Pcmtd1|ENSMUSG00000033740-ENSMUSG00000051285|intergenic_region|ENSMUSG00000033740-ENSMUSG00000051285|||n.6917070G>A||||||	GT:AD:AF:DP:F1R2:F2R1:PGT:PID:PS:SB	0|0:17,0:0.053:17:8,0:8,0:0|1:6917070_G_A:6917070:2,15,0,0	0|1:20,3:0.125:23:6,2:11,0:0|1:6917070_G_A:6917070:9,11,2,1	2985_T1
chr1	6917074	.	C	T	.	PASS	AS_FilterStatus=SITE;AS_SB_TABLE=11,26|2,1;DP=40;ECNT=2;GERMQ=77;MBQ=35,20;MFRL=406,123;MMQ=40,60;MPOS=1;NALOD=1.26;NLOD=5.12;POPAF=6.00;TLOD=9.77;ANN=T|intergenic_region|MODIFIER|St18-Pcmtd1|ENSMUSG00000033740-ENSMUSG00000051285|intergenic_region|ENSMUSG00000033740-ENSMUSG00000051285|||n.6917074C>T||||||	GT:AD:AF:DP:F1R2:F2R1:PGT:PID:PS:SB	0|0:17,0:0.053:17:8,0:8,0:0|1:6917070_G_A:6917070:2,15,0,0	0|1:20,3:0.125:23:8,2:11,1:0|1:6917070_G_A:6917070:9,11,2,1	2985_T1
chr1	6950880	.	G	GT	.	PASS	AS_FilterStatus=SITE;AS_SB_TABLE=33,14|2,6;DP=57;ECNT=2;GERMQ=78;MBQ=36,32;MFRL=438,344;MMQ=60,60;MPOS=38;NALOD=1.43;NLOD=7.82;POPAF=6.00;RPA=7,8;RU=T;STR;STRQ=93;TLOD=16.27;ANN=GT|intergenic_region|MODIFIER|St18-Pcmtd1|ENSMUSG00000033740-ENSMUSG00000051285|intergenic_region|ENSMUSG00000033740-ENSMUSG00000051285|||n.6950880_6950881insT||||||	GT:AD:AF:DP:F1R2:F2R1:SB	0/0:26,0:0.036:26:12,0:12,0:18,8,0,0	0/1:21,8:0.289:29:12,2:8,3:15,6,2,6	613_T1
chr1	6965281	.	CA	C	.	PASS	AS_FilterStatus=SITE;AS_SB_TABLE=30,23|5,12;DP=82;ECNT=1;GERMQ=93;MBQ=33,35;MFRL=461,506;MMQ=60,60;MPOS=43;NALOD=1.32;NLOD=10.40;POPAF=6.00;RPA=11,10;RU=A;STR;STRQ=16;TLOD=38.28;ANN=C|intergenic_region|MODIFIER|St18-Pcmtd1|ENSMUSG00000033740-ENSMUSG00000051285|intergenic_region|ENSMUSG00000033740-ENSMUSG00000051285|||n.6965282delA||||||	GT:AD:AF:DP:F1R2:F2R1:SB	0/0:35,0:0.025:35:20,0:14,0:21,14,0,0	0/1:18,17:0.500:35:10,9:7,5:9,9,5,12	2985_T1
chr1	6996508	.	CTT	C	.	PASS	AS_FilterStatus=SITE;AS_SB_TABLE=15,16|3,2;DP=51;ECNT=2;GERMQ=61;MBQ=34,34;MFRL=473,385;MMQ=60,60;MPOS=27;NALOD=1.16;NLOD=5.98;POPAF=6.00;RPA=14,12;RU=T;STR;STRQ=93;TLOD=10.62;ANN=C|intergenic_region|MODIFIER|St18-Pcmtd1|ENSMUSG00000033740-ENSMUSG00000051285|intergenic_region|ENSMUSG00000033740-ENSMUSG00000051285|||n.6996509_6996510delTT||||||	GT:AD:AF:DP:F1R2:F2R1:SB	0/0:21,0:0.037:21:12,0:6,0:10,11,0,0	0/1:10,5:0.349:15:4,0:5,4:5,5,3,2	613_T1
chr1	7086304	.	GT	G	.	PASS	AS_FilterStatus=SITE;AS_SB_TABLE=25,27|11,6;DP=76;ECNT=1;GERMQ=84;MBQ=32,35;MFRL=454,456;MMQ=60,60;MPOS=31;NALOD=1.07;NLOD=8.91;POPAF=6.00;RPA=13,12;RU=T;STR;STRQ=7;TLOD=23.10;ANN=G|upstream_gene_variant|MODIFIER|Pcmtd1|ENSMUSG00000051285|transcript|ENSMUST00000061280|protein_coding||c.-3027delT|||||2615|,G|intergenic_region|MODIFIER|St18-Pcmtd1|ENSMUSG00000033740-ENSMUSG00000051285|intergenic_re…	GT:AD:AF:DP:F1R2:F2R1:SB	0/0:30,0:0.030:30:10,0:11,0:13,17,0,0	0/1:22,17:0.408:39:6,11:13,4:12,10,11,6	613_T1
chr1	7087731	.	ATT	A	.	PASS	AS_FilterStatus=SITE;AS_SB_TABLE=16,14|2,4;DP=57;ECNT=1;GERMQ=58;MBQ=34,33;MFRL=430,434;MMQ=60,60;MPOS=23;NALOD=1.16;NLOD=6.03;POPAF=6.00;RPA=16,14;RU=T;STR;STRQ=93;TLOD=12.25;ANN=A|upstream_gene_variant|MODIFIER|Pcmtd1|ENSMUSG00000051285|transcript|ENSMUST00000061280|protein_coding||c.-1600_-1599delTT|||||1188|,A|intergenic_region|MODIFIER|St18-Pcmtd1|ENSMUSG00000033740-ENSMUSG00000051285|interg…	GT:AD:AF:DP:F1R2:F2R1:SB	0/0:20,0:0.038:20:9,0:11,0:10,10,0,0	0/1:10,6:0.386:16:4,2:5,4:6,4,2,4	2985_T1
chr1	7108898	.	T	C	.	PASS	AS_FilterStatus=SITE;AS_SB_TABLE=20,32|3,2;DP=57;ECNT=1;GERMQ=93;MBQ=35,33;MFRL=456,471;MMQ=60,60;MPOS=58;NALOD=1.53;NLOD=9.93;POPAF=6.00;TLOD=12.28;ANN=C|intron_variant|MODIFIER|Pcmtd1|ENSMUSG00000051285|transcript|ENSMUST00000061280|protein_coding|1/5|c.-115-11296T>C||||||	GT:AD:AF:DP:F1R2:F2R1:SB	0/0:34,0:0.029:34:14,0:20,0:11,23,0,0	0/1:18,5:0.240:23:12,4:6,1:9,9,3,2	3147_T1
chr1	7115456	.	G	A	.	PASS	AS_FilterStatus=SITE;AS_SB_TABLE=27,26|5,1;DP=59;ECNT=1;GERMQ=93;MBQ=35,33;MFRL=431,491;MMQ=60,60;MPOS=30;NALOD=1.48;NLOD=8.73;POPAF=6.00;TLOD=15.61;ANN=A|intron_variant|MODIFIER|Pcmtd1|ENSMUSG00000051285|transcript|ENSMUST00000061280|protein_coding|1/5|c.-115-4738G>A||||||	GT:AD:AF:DP:F1R2:F2R1:SB	0/0:29,0:0.032:29:13,0:16,0:16,13,0,0	0/1:24,6:0.220:30:12,2:11,4:11,13,5,1	2985_T1
chr1	7119481	.	C	A	.	PASS	AS_FilterStatus=SITE;AS_SB_TABLE=37,21|2,4;DP=66;ECNT=1;GERMQ=93;MBQ=33,35;MFRL=420,488;MMQ=60,60;MPOS=28;NALOD=1.58;NLOD=10.83;POPAF=6.00;TLOD=14.50;ANN=A|intron_variant|MODIFIER|Pcmtd1|ENSMUSG00000051285|transcript|ENSMUST00000061280|protein_coding|1/5|c.-115-713C>A||||||	GT:AD:AF:DP:F1R2:F2R1:SB	0/0:38,0:0.026:38:21,0:17,0:24,14,0,0	0/1:20,6:0.240:26:7,1:13,4:13,7,2,4	2985_T1
chr1	7128948	.	AT	A	.	PASS	AS_FilterStatus=SITE;AS_SB_TABLE=26,31|7,2;DP=69;ECNT=1;GERMQ=93;MBQ=34,34;MFRL=436,482;MMQ=60,60;MPOS=47;NALOD=1.58;NLOD=10.52;POPAF=6.00;RPA=6,5;RU=T;STR;STRQ=93;TLOD=20.01;ANN=A|intron_variant|MODIFIER|Pcmtd1|ENSMUSG00000051285|transcript|ENSMUST00000061280|protein_coding|2/5|c.307+8339delT||||||INFO_REALIGN_3_PRIME	GT:AD:AF:DP:F1R2:F2R1:SB	0/0:36,0:0.026:36:13,0:23,0:15,21,0,0	0/1:21,9:0.312:30:11,2:9,7:11,10,7,2	2985_T1
chr1	7202877	.	CGTGT	C	.	PASS	AS_FilterStatus=SITE;AS_SB_TABLE=13,23|3,3;DP=61;ECNT=1;GERMQ=61;MBQ=28,31;MFRL=446,421;MMQ=60,60;MPOS=29;NALOD=0.749;NLOD=4.45;POPAF=6.00;RPA=19,17;RU=GT;STR;STRQ=93;TLOD=13.93;ANN=C|intergenic_region|MODIFIER|Gm9826-Gm23274|ENSMUSG00000048538-ENSMUSG00000077244|intergenic_region|ENSMUSG00000048538-ENSMUSG00000077244|||n.7202878_7202881delGTGT||||||	GT:AD:AF:DP:F1R2:F2R1:SB	0/0:15,0:0.050:15:4,0:6,0:6,9,0,0	0/1:21,6:0.247:27:5,3:10,1:7,14,3,3	613_T1
chr1	7300042	.	A	AACAC	.	PASS	AS_FilterStatus=SITE;AS_SB_TABLE=14,10|2,2;DP=39;ECNT=1;GERMQ=34;MBQ=34,35;MFRL=472,371;MMQ=60,60;MPOS=48;NALOD=1.09;NLOD=4.87;POPAF=6.00;RPA=20,22;RU=AC;STR;STRQ=93;TLOD=9.92;ANN=AACAC|intergenic_region|MODIFIER|Gm23274-Gm26901|ENSMUSG00000077244-ENSMUSG00000097797|intergenic_region|ENSMUSG00000077244-ENSMUSG00000097797|||n.7300042_7300043insACAC||||||	GT:AD:AF:DP:F1R2:F2R1:SB	0/0:16,0:0.045:16:8,0:8,0:9,7,0,0	0/1:8,4:0.353:12:5,2:3,2:5,3,2,2	3147_T1
chr1	7391652	.	TAA	T	.	PASS	AS_FilterStatus=SITE;AS_SB_TABLE=7,30|0,3;DP=46;ECNT=1;GERMQ=88;MBQ=34,33;MFRL=413,353;MMQ=60,60;MPOS=48;NALOD=1.46;NLOD=7.86;POPAF=6.00;RPA=11,9;RU=A;STR;STRQ=93;TLOD=7.77;ANN=T|intron_variant|MODIFIER|Gm26901|ENSMUSG00000097797|transcript|ENSMUST00000181554|lincRNA|1/2|n.84+6064_84+6065delTT||||||	GT:AD:AF:DP:F1R2:F2R1:SB	0/0:26,0:0.034:26:12,0:9,0:4,22,0,0	0/1:11,3:0.245:14:5,1:5,1:3,8,0,3	2985_T1
chr1	7394486	.	TAC	T	.	PASS	AS_FilterStatus=SITE;AS_SB_TABLE=21,37|2,3;DP=65;ECNT=1;GERMQ=93;MBQ=34,34;MFRL=436,443;MMQ=60,60;MPOS=24;NALOD=1.48;NLOD=8.73;POPAF=6.00;RPA=2,1;RU=AC;STR;STRQ=93;TLOD=15.36;ANN=T|intron_variant|MODIFIER|Gm26901|ENSMUSG00000097797|transcript|ENSMUST00000181554|lincRNA|1/2|n.84+3230_84+3231delGT||||||	GT:AD:AF:DP:F1R2:F2R1:SB	0/0:30,0:0.032:30:12,0:17,0:9,21,0,0	0/1:28,5:0.176:33:12,0:15,5:12,16,2,3	613_T1
chr1	7394642	.	C	T	.	PASS	AS_FilterStatus=SITE;AS_SB_TABLE=29,25|3,3;DP=60;ECNT=1;GERMQ=93;MBQ=33,34;MFRL=467,549;MMQ=60,60;MPOS=35;NALOD=1.43;NLOD=7.82;POPAF=6.00;TLOD=15.59;ANN=T|intron_variant|MODIFIER|Gm26901|ENSMUSG00000097797|transcript|ENSMUST00000181554|lincRNA|1/2|n.84+3076G>A||||||	GT:AD:AF:DP:F1R2:F2R1:SB	0/0:26,0:0.036:26:12,0:14,0:15,11,0,0	0/1:28,6:0.194:34:12,1:15,5:14,14,3,3	613_T1
chr1	7476290	.	A	G	.	PASS	AS_FilterStatus=SITE;AS_SB_TABLE=26,30|4,0;DP=61;ECNT=1;GERMQ=93;MBQ=33,29;MFRL=463,557;MMQ=60,60;MPOS=40;NALOD=1.44;NLOD=7.69;POPAF=6.00;TLOD=6.99;ANN=G|intergenic_region|MODIFIER|Gm26901-Sntg1|ENSMUSG00000097797-ENSMUSG00000025909|intergenic_region|ENSMUSG00000097797-ENSMUSG00000025909|||n.7476290A>G||||||	GT:AD:AF:DP:F1R2:F2R1:SB	0/0:26,0:0.035:26:8,0:15,0:13,13,0,0	0/1:30,4:0.134:34:14,2:8,1:13,17,4,0	3147_T1
chr1	7499710	.	G	A	.	PASS	AS_FilterStatus=SITE;AS_SB_TABLE=24,32|2,5;DP=63;ECNT=1;GERMQ=93;MBQ=33,34;MFRL=443,473;MMQ=60,60;MPOS=46;NALOD=1.49;NLOD=8.98;POPAF=6.00;TLOD=19.39;ANN=A|intergenic_region|MODIFIER|Gm26901-Sntg1|ENSMUSG00000097797-ENSMUSG00000025909|intergenic_region|ENSMUSG00000097797-ENSMUSG00000025909|||n.7499710G>A||||||	GT:AD:AF:DP:F1R2:F2R1:SB	0/0:31,0:0.031:31:16,0:13,0:15,16,0,0	0/1:25,7:0.235:32:6,4:19,3:9,16,2,5	3147_T1
chr1	7536051	.	G	T	.	PASS	AS_FilterStatus=SITE;AS_SB_TABLE=25,24|1,10;DP=60;ECNT=1;GERMQ=82;MBQ=34,34;MFRL=411,399;MMQ=60,60;MPOS=29;NALOD=1.49;NLOD=8.98;POPAF=6.00;TLOD=34.38;ANN=T|intergenic_region|MODIFIER|Gm26901-Sntg1|ENSMUSG00000097797-ENSMUSG00000025909|intergenic_region|ENSMUSG00000097797-ENSMUSG00000025909|||n.7536051G>T||||||	GT:AD:AF:DP:F1R2:F2R1:SB	0/0:33,0:0.031:33:14,0:18,0:18,15,0,0	0/1:16,11:0.414:27:5,5:11,6:7,9,1,10	2985_T1
chr1	7555972	.	CTT	C	.	PASS	AS_FilterStatus=SITE;AS_SB_TABLE=5,17|1,3;DP=41;ECNT=1;GERMQ=43;MBQ=35,36;MFRL=456,353;MMQ=60,60;MPOS=53;NALOD=0.988;NLOD=4.19;POPAF=6.00;RPA=16,14;RU=T;STR;STRQ=93;TLOD=6.86;ANN=C|intergenic_region|MODIFIER|Gm26901-Sntg1|ENSMUSG00000097797-ENSMUSG00000025909|intergenic_region|ENSMUSG00000097797-ENSMUSG00000025909|||n.7555973_7555974delTT||||||	GT:AD:AF:DP:F1R2:F2R1:SB	0/0:14,0:0.053:14:6,0:7,0:1,13,0,0	0/1:8,4:0.353:12:2,3:4,1:4,4,1,3	613_T1
chr1	7607109	.	CT	C	.	PASS	AS_FilterStatus=SITE;AS_SB_TABLE=23,35|1,3;DP=63;ECNT=1;GERMQ=93;MBQ=35,37;MFRL=441,391;MMQ=60,60;MPOS=20;NALOD=1.51;NLOD=9.32;POPAF=6.00;RPA=6,5;RU=T;STR;STRQ=93;TLOD=6.86;ANN=C|intergenic_region|MODIFIER|Gm26901-Sntg1|ENSMUSG00000097797-ENSMUSG00000025909|intergenic_region|ENSMUSG00000097797-ENSMUSG00000025909|||n.7607110delT||||||	GT:AD:AF:DP:F1R2:F2R1:SB	0/0:32,0:0.030:32:14,0:16,0:10,22,0,0	0/1:26,4:0.155:30:16,0:10,4:13,13,1,3	3147_T1
chr1	7634084	.	AT	A	.	PASS	AS_FilterStatus=SITE;AS_SB_TABLE=35,34|6,2;DP=81;ECNT=1;GERMQ=93;MBQ=34,34;MFRL=439,421;MMQ=60,60;MPOS=25;NALOD=1.64;NLOD=12.33;POPAF=6.00;RPA=6,5;RU=T;STR;STRQ=93;TLOD=16.55;ANN=A|intergenic_region|MODIFIER|Gm26901-Sntg1|ENSMUSG00000097797-ENSMUSG00000025909|intergenic_region|ENSMUSG00000097797-ENSMUSG00000025909|||n.7634085delT||||||	GT:AD:AF:DP:F1R2:F2R1:SB	0/0:41,0:0.023:41:19,0:21,0:21,20,0,0	0/1:28,8:0.243:36:16,4:12,4:14,14,6,2	2985_T1
chr1	7662833	.	CT	C	.	PASS	AS_FilterStatus=SITE;AS_SB_TABLE=29,46|3,3;DP=86;ECNT=1;GERMQ=93;MBQ=35,34;MFRL=440,363;MMQ=60,60;MPOS=18;NALOD=1.61;NLOD=11.11;POPAF=6.00;RPA=6,5;RU=T;STR;STRQ=93;TLOD=10.68;ANN=C|intergenic_region|MODIFIER|Gm26901-Sntg1|ENSMUSG00000097797-ENSMUSG00000025909|intergenic_region|ENSMUSG00000097797-ENSMUSG00000025909|||n.7662834delT||||||	GT:AD:AF:DP:F1R2:F2R1:SB	0/0:38,0:0.024:38:21,0:17,0:12,26,0,0	0/1:37,6:0.158:43:21,3:16,3:17,20,3,3	613_T1
chr1	7663446	.	C	T	.	PASS	AS_FilterStatus=SITE;AS_SB_TABLE=25,41|5,1;DP=75;ECNT=1;GERMQ=93;MBQ=28,35;MFRL=429,425;MMQ=60,60;MPOS=31;NALOD=1.66;NLOD=13.19;POPAF=6.00;TLOD=16.73;ANN=T|intergenic_region|MODIFIER|Gm26901-Sntg1|ENSMUSG00000097797-ENSMUSG00000025909|intergenic_region|ENSMUSG00000097797-ENSMUSG00000025909|||n.7663446C>T||||||	GT:AD:AF:DP:F1R2:F2R1:SB	0/0:44,0:0.022:44:20,0:23,0:17,27,0,0	0/1:22,6:0.241:28:6,3:16,3:8,14,5,1	613_T1
chr1	7854375	.	T	C	.	PASS	AS_FilterStatus=SITE;AS_SB_TABLE=33,15|2,2;DP=54;ECNT=1;GERMQ=93;MBQ=34,31;MFRL=449,344;MMQ=60,60;MPOS=58;NALOD=1.48;NLOD=8.73;POPAF=6.00;TLOD=8.67;ANN=C|intergenic_region|MODIFIER|Gm26901-Sntg1|ENSMUSG00000097797-ENSMUSG00000025909|intergenic_region|ENSMUSG00000097797-ENSMUSG00000025909|||n.7854375T>C||||||	GT:AD:AF:DP:F1R2:F2R1:SB	0/0:29,0:0.032:29:11,0:18,0:21,8,0,0	0/1:19,4:0.199:23:10,1:9,3:12,7,2,2	3147_T1
chr1	7860248	.	GTTT	G	.	PASS	AS_FilterStatus=SITE;AS_SB_TABLE=23,16|2,1;DP=58;ECNT=1;GERMQ=76;MBQ=36,37;MFRL=416,457;MMQ=60,60;MPOS=25;NALOD=0.754;NLOD=4.72;POPAF=6.00;RPA=19,16;RU=T;STR;STRQ=93;TLOD=7.05;ANN=G|intergenic_region|MODIFIER|Gm26901-Sntg1|ENSMUSG00000097797-ENSMUSG00000025909|intergenic_region|ENSMUSG00000097797-ENSMUSG00000025909|||n.7860249_7860251delTTT||||||	GT:AD:AF:DP:F1R2:F2R1:SB	0/0:17,0:0.048:17:6,0:6,0:8,9,0,0	0/1:22,3:0.153:25:10,1:9,1:15,7,2,1	613_T1
chr1	7897410	.	G	A	.	PASS	AS_FilterStatus=SITE;AS_SB_TABLE=28,31|4,6;DP=72;ECNT=1;GERMQ=93;MBQ=34,34;MFRL=435,471;MMQ=60,60;MPOS=43;NALOD=1.60;NLOD=11.39;POPAF=6.00;TLOD=30.01;ANN=A|intergenic_region|MODIFIER|Gm26901-Sntg1|ENSMUSG00000097797-ENSMUSG00000025909|intergenic_region|ENSMUSG00000097797-ENSMUSG00000025909|||n.7897410G>A||||||	GT:AD:AF:DP:F1R2:F2R1:SB	0/0:38,0:0.025:38:16,0:21,0:17,21,0,0	0/1:21,10:0.333:31:8,3:12,7:11,10,4,6	2985_T1
chr1	7913444	.	CA	C	.	PASS	AS_FilterStatus=SITE;AS_SB_TABLE=32,35|3,4;DP=83;ECNT=1;GERMQ=93;MBQ=33,36;MFRL=464,448;MMQ=60,60;MPOS=48;NALOD=1.47;NLOD=8.11;POPAF=6.00;RPA=7,6;RU=A;STR;STRQ=93;TLOD=12.30;ANN=C|intergenic_region|MODIFIER|Gm26901-Sntg1|ENSMUSG00000097797-ENSMUSG00000025909|intergenic_region|ENSMUSG00000097797-ENSMUSG00000025909|||n.7913445delA||||||	GT:AD:AF:DP:F1R2:F2R1:SB	0/0:27,0:0.033:27:16,0:9,0:14,13,0,0	0/1:40,7:0.162:47:20,1:19,5:18,22,3,4	613_T1
chr1	7973393	.	ATGTGTG	A	.	PASS	AS_FilterStatus=SITE;AS_SB_TABLE=10,11|1,3;DP=53;ECNT=1;GERMQ=27;MBQ=33,32;MFRL=441,387;MMQ=60,60;MPOS=57;NALOD=0.983;NLOD=3.56;POPAF=6.00;RPA=28,25;RU=TG;STR;STRQ=93;TLOD=14.29;ANN=A|intergenic_region|MODIFIER|Gm26901-Sntg1|ENSMUSG00000097797-ENSMUSG00000025909|intergenic_region|ENSMUSG00000097797-ENSMUSG00000025909|||n.7973394_7973399delTGTGTG||||||	GT:AD:AF:DP:F1R2:F2R1:SB	0/0:13,0:0.056:13:6,0:4,0:7,6,0,0	0/1:8,4:0.362:12:2,1:3,2:3,5,1,3	613_T1
chr1	8015589	.	TTCTCTC	T	.	PASS	AS_FilterStatus=SITE;AS_SB_TABLE=7,14|1,5;DP=46;ECNT=1;GERMQ=24;MBQ=35,34;MFRL=455,403;MMQ=60,60;MPOS=48;NALOD=0.976;NLOD=3.80;POPAF=6.00;RPA=23,20;RU=TC;STR;STRQ=93;TLOD=22.46;ANN=T|intergenic_region|MODIFIER|Gm26901-Sntg1|ENSMUSG00000097797-ENSMUSG00000025909|intergenic_region|ENSMUSG00000097797-ENSMUSG00000025909|||n.8015590_8015595delTCTCTC||||||	GT:AD:AF:DP:F1R2:F2R1:SB	0/0:13,0:0.055:13:2,0:9,0:4,9,0,0	0/1:8,6:0.444:14:1,2:3,4:3,5,1,5	613_T1
chr1	8047093	.	C	T	.	PASS	AS_FilterStatus=SITE;AS_SB_TABLE=36,31|4,1;DP=75;ECNT=1;GERMQ=93;MBQ=33,34;MFRL=448,422;MMQ=60,60;MPOS=41;NALOD=1.57;NLOD=10.83;POPAF=6.00;TLOD=11.63;ANN=T|intergenic_region|MODIFIER|Gm26901-Sntg1|ENSMUSG00000097797-ENSMUSG00000025909|intergenic_region|ENSMUSG00000097797-ENSMUSG00000025909|||n.8047093C>T||||||	GT:AD:AF:DP:F1R2:F2R1:SB	0/0:36,0:0.026:36:13,0:23,0:22,14,0,0	0/1:31,5:0.157:36:12,1:19,4:14,17,4,1	613_T1
chr1	8054807	.	CTT	C	.	PASS	AS_FilterStatus=SITE;AS_SB_TABLE=24,11|5,2;DP=52;ECNT=1;GERMQ=67;MBQ=33,33;MFRL=425,447;MMQ=60,60;MPOS=53;NALOD=1.17;NLOD=7.24;POPAF=6.00;RPA=19,17;RU=T;STR;STRQ=93;TLOD=12.53;ANN=C|intergenic_region|MODIFIER|Gm26901-Sntg1|ENSMUSG00000097797-ENSMUSG00000025909|intergenic_region|ENSMUSG00000097797-ENSMUSG00000025909|||n.8054808_8054809delTT||||||	GT:AD:AF:DP:F1R2:F2R1:SB	0/0:24,0:0.036:24:11,0:10,0:16,8,0,0	0/1:11,7:0.398:18:7,2:2,4:8,3,5,2	3147_T1
chr1	8130170	.	CAGAGAG	C	.	PASS	AS_FilterStatus=SITE;AS_SB_TABLE=9,11|2,2;DP=39;ECNT=1;GERMQ=22;MBQ=33,35;MFRL=473,393;MMQ=60,60;MPOS=49;NALOD=0.773;NLOD=2.66;POPAF=6.00;RPA=20,17;RU=AG;STR;STRQ=93;TLOD=11.65;ANN=C|intergenic_region|MODIFIER|Gm26901-Sntg1|ENSMUSG00000097797-ENSMUSG00000025909|intergenic_region|ENSMUSG00000097797-ENSMUSG00000025909|||n.8130171_8130176delAGAGAG||||||	GT:AD:AF:DP:F1R2:F2R1:SB	0/0:10,0:0.072:10:1,0:5,0:5,5,0,0	0/1:10,4:0.313:14:5,1:3,3:4,6,2,2	613_T1
chr1	8182826	.	TA	T	.	PASS	AS_FilterStatus=SITE;AS_SB_TABLE=43,30|6,2;DP=86;ECNT=1;GERMQ=93;MBQ=35,35;MFRL=436,414;MMQ=60,60;MPOS=38;NALOD=1.63;NLOD=12.01;POPAF=6.00;RPA=6,5;RU=A;STR;STRQ=93;TLOD=15.79;ANN=T|intergenic_region|MODIFIER|Gm26901-Sntg1|ENSMUSG00000097797-ENSMUSG00000025909|intergenic_region|ENSMUSG00000097797-ENSMUSG00000025909|||n.8182827delA||||||	GT:AD:AF:DP:F1R2:F2R1:SB	0/0:40,0:0.023:40:17,0:22,0:21,19,0,0	0/1:33,8:0.208:41:16,3:16,5:22,11,6,2	2985_T1
chr1	8203965	.	C	A	.	PASS	AS_FilterStatus=SITE;AS_SB_TABLE=28,33|9,4;DP=76;ECNT=1;GERMQ=93;MBQ=34,34;MFRL=419,448;MMQ=60,60;MPOS=51;NALOD=1.62;NLOD=12.04;POPAF=6.00;TLOD=40.31;ANN=A|intergenic_region|MODIFIER|Gm26901-Sntg1|ENSMUSG00000097797-ENSMUSG00000025909|intergenic_region|ENSMUSG00000097797-ENSMUSG00000025909|||n.8203965C>A||||||	GT:AD:AF:DP:F1R2:F2R1:SB	0/0:41,0:0.024:41:19,0:21,0:20,21,0,0	0/1:20,13:0.400:33:11,8:9,5:8,12,9,4	2985_T1
chr1	8243046	.	CTT	C	.	PASS	AS_FilterStatus=SITE;AS_SB_TABLE=23,13|1,2;DP=50;ECNT=1;GERMQ=83;MBQ=33,35;MFRL=457,370;MMQ=60,60;MPOS=28;NALOD=1.39;NLOD=6.30;POPAF=6.00;RPA=13,11;RU=T;STR;STRQ=93;TLOD=7.10;ANN=C|intergenic_region|MODIFIER|Gm26901-Sntg1|ENSMUSG00000097797-ENSMUSG00000025909|intergenic_region|ENSMUSG00000097797-ENSMUSG00000025909|||n.8243047_8243048delTT||||||	GT:AD:AF:DP:F1R2:F2R1:SB	0/0:21,0:0.040:21:9,0:9,0:15,6,0,0	0/1:15,3:0.197:18:7,1:8,2:8,7,1,2	613_T1
chr1	8243552	.	GTT	G	.	PASS	AS_FilterStatus=SITE;AS_SB_TABLE=11,15|2,3;DP=50;ECNT=1;GERMQ=45;MBQ=18,21;MFRL=436,423;MMQ=60,60;MPOS=34;NALOD=1.04;NLOD=3.86;POPAF=6.00;RPA=18,16;RU=T;STR;STRQ=93;TLOD=8.83;ANN=G|intergenic_region|MODIFIER|Gm26901-Sntg1|ENSMUSG00000097797-ENSMUSG00000025909|intergenic_region|ENSMUSG00000097797-ENSMUSG00000025909|||n.8243553_8243554delTT||||||	GT:AD:AF:DP:F1R2:F2R1:SB	0/0:13,0:0.054:13:3,0:2,0:4,9,0,0	0/1:13,5:0.296:18:4,2:3,1:7,6,2,3	613_T1
chr1	8247606	.	GT	G	.	PASS	AS_FilterStatus=SITE;AS_SB_TABLE=28,36|1,4;DP=74;ECNT=1;GERMQ=93;MBQ=32,32;MFRL=403,493;MMQ=60,60;MPOS=42;NALOD=1.58;NLOD=10.21;POPAF=6.00;RPA=7,6;RU=T;STR;STRQ=93;TLOD=8.61;ANN=G|intergenic_region|MODIFIER|Gm26901-Sntg1|ENSMUSG00000097797-ENSMUSG00000025909|intergenic_region|ENSMUSG00000097797-ENSMUSG00000025909|||n.8247607delT||||||	GT:AD:AF:DP:F1R2:F2R1:SB	0/0:35,0:0.026:35:14,0:18,0:17,18,0,0	0/1:29,5:0.170:34:15,2:12,3:11,18,1,4	613_T1
chr1	8404643	.	TA	T	.	PASS	AS_FilterStatus=SITE;AS_SB_TABLE=27,25|9,6;DP=73;ECNT=1;GERMQ=93;MBQ=34,35;MFRL=442,417;MMQ=60,60;MPOS=24;NALOD=1.66;NLOD=12.00;POPAF=6.00;RPA=9,8;RU=A;STR;STRQ=20;TLOD=30.83;ANN=T|intron_variant|MODIFIER|Sntg1|ENSMUSG00000025909|transcript|ENSMUST00000140295|protein_coding|20/20|c.1425+9559delT||||||	GT:AD:AF:DP:F1R2:F2R1:SB	0/0:40,0:0.022:40:21,0:19,0:21,19,0,0	0/1:12,15:0.533:27:7,9:5,6:6,6,9,6	2985_T1
chr1	8413073	.	A	G	.	PASS	AS_FilterStatus=SITE;AS_SB_TABLE=27,27|3,0;DP=58;ECNT=2;GERMQ=93;MBQ=34,35;MFRL=420,431;MMQ=60,60;MPOS=14;NALOD=1.49;NLOD=8.35;POPAF=6.00;TLOD=6.96;ANN=G|intron_variant|MODIFIER|Sntg1|ENSMUSG00000025909|transcript|ENSMUST00000140295|protein_coding|20/20|c.1425+1130T>C||||||	GT:AD:AF:DP:F1R2:F2R1:PGT:PID:PS:SB	0|0:28,0:0.032:28:15,0:11,0:0|1:8413073_A_G:8413073:14,14,0,0	0|1:26,3:0.128:29:13,2:13,1:0|1:8413073_A_G:8413073:13,13,3,0	2985_T1
chr1	8442835	.	AC	A	.	PASS	AS_FilterStatus=SITE;AS_SB_TABLE=19,23|3,3;DP=53;ECNT=1;GERMQ=85;MBQ=34,34;MFRL=448,495;MMQ=60,60;MPOS=41;NALOD=1.45;NLOD=7.81;POPAF=6.00;RPA=6,5;RU=C;STR;STRQ=93;TLOD=13.02;ANN=A|intron_variant|MODIFIER|Sntg1|ENSMUSG00000025909|transcript|ENSMUST00000140295|protein_coding|19/20|c.1314+2191delG||||||	GT:AD:AF:DP:F1R2:F2R1:SB	0/0:27,0:0.034:27:16,0:10,0:12,15,0,0	0/1:15,6:0.303:21:10,4:4,2:7,8,3,3	613_T1
chr1	8481285	.	C	T	.	PASS	AS_FilterStatus=SITE;AS_SB_TABLE=32,33|4,3;DP=74;ECNT=1;GERMQ=93;MBQ=34,34;MFRL=435,442;MMQ=60,60;MPOS=37;NALOD=1.51;NLOD=9.28;POPAF=6.00;TLOD=18.36;ANN=T|intron_variant|MODIFIER|Sntg1|ENSMUSG00000025909|transcript|ENSMUST00000140295|protein_coding|15/20|c.880-15732G>A||||||	GT:AD:AF:DP:F1R2:F2R1:SB	0/0:31,0:0.030:31:13,0:17,0:15,16,0,0	0/1:34,7:0.186:41:14,2:20,5:17,17,4,3	613_T1
chr1	8493171	.	T	TG	.	PASS	AS_FilterStatus=SITE;AS_SB_TABLE=38,34|2,2;DP=83;ECNT=2;GERMQ=93;MBQ=35,35;MFRL=433,464;MMQ=60,60;MPOS=40;NALOD=1.36;NLOD=12.34;POPAF=6.00;RPA=7,8;RU=G;STR;STRQ=93;TLOD=6.27;ANN=TG|intron_variant|MODIFIER|Sntg1|ENSMUSG00000025909|transcript|ENSMUST00000140295|protein_coding|15/20|c.880-27619dupC||||||	GT:AD:AF:DP:F1R2:F2R1:PGT:PID:PS:SB	0|0:42,0:0.022:42:22,0:20,0:1|0:8493162_CT_C:8493162:24,18,0,0	1|0:30,4:0.145:34:13,1:17,3:1|0:8493162_CT_C:8493162:14,16,2,2	613_T1
chr1	8549737	.	A	C	.	PASS	AS_FilterStatus=SITE;AS_SB_TABLE=48,32|4,2;DP=88;ECNT=2;GERMQ=93;MBQ=34,32;MFRL=420,376;MMQ=60,60;MPOS=31;NALOD=1.67;NLOD=13.45;POPAF=6.00;TLOD=9.14;ANN=C|intron_variant|MODIFIER|Sntg1|ENSMUSG00000025909|transcript|ENSMUST00000140295|protein_coding|15/20|c.879+4988T>G||||||	GT:AD:AF:DP:F1R2:F2R1:PGT:PID:PS:SB	0|0:46,0:0.021:46:26,0:18,0:1|0:8549726_GA_G:8549726:30,16,0,0	1|0:34,6:0.153:40:19,4:15,2:1|0:8549726_GA_G:8549726:18,16,4,2	613_T1
chr1	8610709	.	GA	G	.	PASS	AS_FilterStatus=SITE;AS_SB_TABLE=27,22|2,4;DP=58;ECNT=1;GERMQ=93;MBQ=34,34;MFRL=496,444;MMQ=60,60;MPOS=56;NALOD=1.51;NLOD=9.01;POPAF=6.00;RPA=7,6;RU=A;STR;STRQ=93;TLOD=9.61;ANN=G|intron_variant|MODIFIER|Sntg1|ENSMUSG00000025909|transcript|ENSMUST00000140295|protein_coding|11/20|c.497-3558delT||||||	GT:AD:AF:DP:F1R2:F2R1:SB	0/0:30,0:0.030:30:14,0:16,0:16,14,0,0	0/1:19,6:0.234:25:9,4:9,2:11,8,2,4	3147_T1
chr1	8615246	.	C	CA	.	PASS	AS_FilterStatus=SITE;AS_SB_TABLE=31,29|4,6;DP=73;ECNT=1;GERMQ=93;MBQ=34,36;MFRL=433,485;MMQ=60,60;MPOS=40;NALOD=1.60;NLOD=11.43;POPAF=6.00;RPA=5,6;RU=A;STR;STRQ=93;TLOD=22.62;ANN=CA|intron_variant|MODIFIER|Sntg1|ENSMUSG00000025909|transcript|ENSMUST00000140295|protein_coding|11/20|c.497-8095dupT||||||	GT:AD:AF:DP:F1R2:F2R1:SB	0/0:39,0:0.024:39:16,0:23,0:22,17,0,0	0/1:21,10:0.332:31:12,6:9,4:9,12,4,6	2985_T1
chr1	8680547	.	AG	A	.	PASS	AS_FilterStatus=SITE;AS_SB_TABLE=44,34|5,2;DP=85;ECNT=1;GERMQ=93;MBQ=36,36;MFRL=439,525;MMQ=60,60;MPOS=25;NALOD=1.64;NLOD=12.32;POPAF=6.00;RPA=4,3;RU=G;STR;STRQ=93;TLOD=15.06;ANN=A|intron_variant|MODIFIER|Sntg1|ENSMUSG00000025909|transcript|ENSMUST00000140295|protein_coding|7/20|c.253-1418delC||||||	GT:AD:AF:DP:F1R2:F2R1:SB	0/0:43,0:0.022:43:16,0:26,0:26,17,0,0	0/1:35,7:0.181:42:22,6:13,1:18,17,5,2	613_T1
chr1	8688385	.	T	C	.	PASS	AS_FilterStatus=SITE;AS_SB_TABLE=7,25|0,3;DP=37;ECNT=1;GERMQ=60;MBQ=34,35;MFRL=369,138;MMQ=40,40;MPOS=13;NALOD=1.21;NLOD=4.42;POPAF=6.00;TLOD=5.69;ANN=C|intron_variant|MODIFIER|Sntg1|ENSMUSG00000025909|transcript|ENSMUST00000140295|protein_coding|6/20|c.196-6356A>G||||||	GT:AD:AF:DP:F1R2:F2R1:SB	0/0:16,0:0.058:16:6,0:8,0:4,12,0,0	0/1:16,3:0.212:19:5,2:7,1:3,13,0,3	3147_T1
chr1	8741372	.	TA	T	.	PASS	AS_FilterStatus=SITE;AS_SB_TABLE=32,34|3,3;DP=76;ECNT=1;GERMQ=93;MBQ=34,35;MFRL=439,420;MMQ=60,60;MPOS=26;NALOD=1.55;NLOD=10.22;POPAF=6.00;RPA=7,6;RU=A;STR;STRQ=93;TLOD=11.61;ANN=T|intron_variant|MODIFIER|Sntg1|ENSMUSG00000025909|transcript|ENSMUST00000140295|protein_coding|6/20|c.195+41390delT||||||	GT:AD:AF:DP:F1R2:F2R1:SB	0/0:34,0:0.027:34:18,0:16,0:15,19,0,0	0/1:32,6:0.174:38:14,2:16,4:17,15,3,3	2985_T1
chr1	8753785	.	ATTT	A	.	PASS	AS_FilterStatus=SITE;AS_SB_TABLE=15,8|1,4;DP=36;ECNT=1;GERMQ=34;MBQ=33,24;MFRL=457,359;MMQ=60,60;MPOS=26;NALOD=1.24;NLOD=4.19;POPAF=6.00;RPA=20,17;RU=T;STR;STRQ=93;TLOD=10.10;ANN=A|intron_variant|MODIFIER|Sntg1|ENSMUSG00000025909|transcript|ENSMUST00000140295|protein_coding|6/20|c.195+28975_195+28977delAAA||||||	GT:AD:AF:DP:F1R2:F2R1:SB	0/0:14,0:0.056:14:6,0:5,0:9,5,0,0	0/1:9,5:0.347:14:5,1:1,1:6,3,1,4	613_T1
chr1	8809339	.	A	G	.	PASS	AS_FilterStatus=SITE;AS_SB_TABLE=32,38|1,2;DP=78;ECNT=1;GERMQ=93;MBQ=35,33;MFRL=459,358;MMQ=60,60;MPOS=46;NALOD=1.53;NLOD=9.63;POPAF=6.00;TLOD=5.92;ANN=G|intron_variant|MODIFIER|Sntg1|ENSMUSG00000025909|transcript|ENSMUST00000140295|protein_coding|4/20|c.7-5369T>C||||||	GT:AD:AF:DP:F1R2:F2R1:SB	0/0:32,0:0.029:32:11,0:21,0:11,21,0,0	0/1:38,3:0.095:41:21,3:17,0:21,17,1,2	613_T1
chr1	8816217	.	C	T	.	PASS	AS_FilterStatus=SITE;AS_SB_TABLE=45,28|3,4;DP=82;ECNT=1;GERMQ=93;MBQ=34,33;MFRL=428,386;MMQ=60,60;MPOS=22;NALOD=1.64;NLOD=12.55;POPAF=6.00;TLOD=16.28;ANN=T|intron_variant|MODIFIER|Sntg1|ENSMUSG00000025909|transcript|ENSMUST00000140295|protein_coding|4/20|c.7-12247G>A||||||,T|non_coding_transcript_exon_variant|MODIFIER|Gm24276|ENSMUSG00000076135|transcript|ENSMUST00000102181|miRNA|1/1|n.80C>T||||||	GT:AD:AF:DP:F1R2:F2R1:SB	0/0:43,0:0.023:43:24,0:17,0:23,20,0,0	0/1:30,7:0.185:37:15,4:12,3:22,8,3,4	2985_T1
chr1	8816394	.	C	G	.	PASS	AS_FilterStatus=SITE;AS_SB_TABLE=23,29|2,1;DP=56;ECNT=1;GERMQ=93;MBQ=33,35;MFRL=399,347;MMQ=60,60;MPOS=36;NALOD=1.51;NLOD=9.28;POPAF=6.00;TLOD=6.94;ANN=G|downstream_gene_variant|MODIFIER|Gm24276|ENSMUSG00000076135|transcript|ENSMUST00000102181|miRNA||n.*147C>G|||||147|,G|intron_variant|MODIFIER|Sntg1|ENSMUSG00000025909|transcript|ENSMUST00000140295|protein_coding|4/20|c.7-12424G>C||||||	GT:AD:AF:DP:F1R2:F2R1:SB	0/0:31,0:0.030:31:14,0:16,0:14,17,0,0	0/1:21,3:0.155:24:10,1:9,2:9,12,2,1	2985_T1
chr1	8856528	.	G	A	.	PASS	AS_FilterStatus=SITE;AS_SB_TABLE=23,22|2,3;DP=51;ECNT=1;GERMQ=90;MBQ=32,34;MFRL=433,413;MMQ=60,60;MPOS=59;NALOD=1.08;NLOD=6.02;POPAF=6.00;TLOD=7.16;ANN=A|upstream_gene_variant|MODIFIER|Gm6152|ENSMUSG00000086195|transcript|ENSMUST00000151704|processed_pseudogene||n.-261C>T|||||261|,A|intron_variant|MODIFIER|Sntg1|ENSMUSG00000025909|transcript|ENSMUST00000140295|protein_coding|4/20|c.6+25633C>T||||…	GT:AD:AF:DP:F1R2:F2R1:SB	0/0:20,0:0.043:20:13,0:5,0:8,12,0,0	0/1:25,5:0.166:30:12,2:13,2:15,10,2,3	613_T1
chr1	8897247	.	C	A	.	PASS	AS_FilterStatus=SITE;AS_SB_TABLE=36,36|3,3;DP=81;ECNT=1;GERMQ=93;MBQ=34,34;MFRL=458,378;MMQ=60,60;MPOS=32;NALOD=1.61;NLOD=11.64;POPAF=6.00;TLOD=13.23;ANN=A|intron_variant|MODIFIER|Sntg1|ENSMUSG00000025909|transcript|ENSMUST00000140295|protein_coding|3/20|c.-48-15033G>T||||||	GT:AD:AF:DP:F1R2:F2R1:SB	0/0:39,0:0.024:39:24,0:11,0:22,17,0,0	0/1:33,6:0.150:39:18,3:15,3:14,19,3,3	2985_T1
chr1	9041125	.	G	A	.	PASS	AS_FilterStatus=SITE;AS_SB_TABLE=26,22|2,4;DP=55;ECNT=1;GERMQ=93;MBQ=35,34;MFRL=459,538;MMQ=60,60;MPOS=28;NALOD=1.39;NLOD=6.92;POPAF=6.00;TLOD=15.61;ANN=A|intron_variant|MODIFIER|Sntg1|ENSMUSG00000025909|transcript|ENSMUST00000140295|protein_coding|2/20|c.-112-41876C>T||||||	GT:AD:AF:DP:F1R2:F2R1:SB	0/0:23,0:0.039:23:16,0:7,0:13,10,0,0	0/1:25,6:0.213:31:9,3:15,3:13,12,2,4	2985_T1
chr1	9059736	.	AT	A	.	PASS	AS_FilterStatus=SITE;AS_SB_TABLE=17,13|2,4;DP=37;ECNT=1;GERMQ=54;MBQ=34,35;MFRL=397,469;MMQ=40,40;MPOS=29;NALOD=1.30;NLOD=5.41;POPAF=6.00;RPA=5,4;RU=T;STR;STRQ=93;TLOD=14.23;ANN=A|intron_variant|MODIFIER|Sntg1|ENSMUSG00000025909|transcript|ENSMUST00000140295|protein_coding|2/20|c.-112-60488delA||||||	GT:AD:AF:DP:F1R2:F2R1:SB	0/0:19,0:0.048:19:9,0:10,0:12,7,0,0	0/1:11,6:0.368:17:7,3:4,3:5,6,2,4	613_T1
chr1	9103960	.	C	A	.	PASS	AS_FilterStatus=SITE;AS_SB_TABLE=27,31|4,5;DP=73;ECNT=1;GERMQ=93;MBQ=36,35;MFRL=422,382;MMQ=60,60;MPOS=21;NALOD=1.55;NLOD=10.09;POPAF=6.00;TLOD=23.54;ANN=A|intron_variant|MODIFIER|Sntg1|ENSMUSG00000025909|transcript|ENSMUST00000140295|protein_coding|2/20|c.-113+99219G>T||||||	GT:AD:AF:DP:F1R2:F2R1:SB	0/0:34,0:0.027:34:12,0:19,0:13,21,0,0	0/1:24,9:0.283:33:10,2:8,6:14,10,4,5	2985_T1
chr1	9181978	.	A	G	.	PASS	AS_FilterStatus=SITE;AS_SB_TABLE=28,29|3,0;DP=61;ECNT=1;GERMQ=93;MBQ=35,36;MFRL=463,476;MMQ=60,60;MPOS=19;NALOD=1.39;NLOD=6.83;POPAF=6.00;TLOD=6.20;ANN=G|intron_variant|MODIFIER|Sntg1|ENSMUSG00000025909|transcript|ENSMUST00000140295|protein_coding|2/20|c.-113+21201T>C||||||	GT:AD:AF:DP:F1R2:F2R1:SB	0/0:23,0:0.040:23:17,0:4,0:9,14,0,0	0/1:34,3:0.106:37:16,2:15,1:19,15,3,0	613_T1
chr1	9218201	.	G	A	.	PASS	AS_FilterStatus=SITE;AS_SB_TABLE=44,29|4,4;DP=84;ECNT=1;GERMQ=93;MBQ=36,34;MFRL=455,430;MMQ=60,60;MPOS=55;NALOD=1.58;NLOD=10.79;POPAF=6.00;TLOD=21.90;ANN=A|intron_variant|MODIFIER|Sntg1|ENSMUSG00000025909|transcript|ENSMUST00000140295|protein_coding|1/20|c.-194-14941C>T||||||	GT:AD:AF:DP:F1R2:F2R1:SB	0/0:36,0:0.026:36:20,0:15,0:19,17,0,0	0/1:37,8:0.191:45:17,5:20,3:25,12,4,4	613_T1
chr1	9290183	.	GA	G	.	PASS	AS_FilterStatus=SITE;AS_SB_TABLE=31,19|10,8;DP=76;ECNT=1;GERMQ=62;MBQ=35,35;MFRL=433,442;MMQ=60,60;MPOS=31;NALOD=1.41;NLOD=6.56;POPAF=6.00;RPA=17,16;RU=A;STR;STRQ=4;TLOD=28.09;ANN=G|intron_variant|MODIFIER|Sntg1|ENSMUSG00000025909|transcript|ENSMUST00000140295|protein_coding|1/20|c.-195+7949delT||||||	GT:AD:AF:DP:F1R2:F2R1:SB	0/0:23,0:0.038:23:13,0:9,0:14,9,0,0	0/1:27,18:0.401:45:12,4:15,12:17,10,10,8	613_T1
chr1	9291155	.	G	T	.	PASS	AS_FilterStatus=SITE;AS_SB_TABLE=32,38|2,5;DP=78;ECNT=1;GERMQ=93;MBQ=34,35;MFRL=434,474;MMQ=60,60;MPOS=53;NALOD=1.68;NLOD=13.75;POPAF=6.00;TLOD=20.04;ANN=T|intron_variant|MODIFIER|Sntg1|ENSMUSG00000025909|transcript|ENSMUST00000140295|protein_coding|1/20|c.-195+6978C>A||||||	GT:AD:AF:DP:F1R2:F2R1:SB	0/0:47,0:0.021:47:24,0:20,0:20,27,0,0	0/1:23,7:0.250:30:11,4:12,3:12,11,2,5	2985_T1
chr1	9311903	.	G	T	.	PASS	AS_FilterStatus=SITE;AS_SB_TABLE=28,21|3,5;DP=57;ECNT=1;GERMQ=93;MBQ=35,34;MFRL=394,410;MMQ=60,60;MPOS=36;NALOD=1.46;NLOD=8.38;POPAF=6.00;TLOD=20.48;ANN=T|intergenic_region|MODIFIER|Sntg1-Gm24765|ENSMUSG00000025909-ENSMUSG00000065625|intergenic_region|ENSMUSG00000025909-ENSMUSG00000065625|||n.9311903G>T||||||	GT:AD:AF:DP:F1R2:F2R1:SB	0/0:28,0:0.033:28:13,0:14,0:15,13,0,0	0/1:21,8:0.283:29:11,4:10,3:13,8,3,5	2985_T1
chr1	9327143	.	C	A	.	PASS	AS_FilterStatus=SITE;AS_SB_TABLE=32,21|3,2;DP=59;ECNT=1;GERMQ=93;MBQ=34,35;MFRL=439,436;MMQ=60,60;MPOS=40;NALOD=1.47;NLOD=8.38;POPAF=6.00;TLOD=12.35;ANN=A|intergenic_region|MODIFIER|Sntg1-Gm24765|ENSMUSG00000025909-ENSMUSG00000065625|intergenic_region|ENSMUSG00000025909-ENSMUSG00000065625|||n.9327143C>A||||||	GT:AD:AF:DP:F1R2:F2R1:SB	0/0:28,0:0.033:28:14,0:12,0:18,10,0,0	0/1:25,5:0.188:30:13,4:11,1:14,11,3,2	2985_T1
chr1	9389082	.	CA	C	.	PASS	AS_FilterStatus=SITE;AS_SB_TABLE=17,27|4,2;DP=53;ECNT=1;GERMQ=86;MBQ=36,32;MFRL=455,423;MMQ=60,60;MPOS=33;NALOD=1.37;NLOD=6.30;POPAF=6.00;RPA=7,6;RU=A;STR;STRQ=93;TLOD=11.52;ANN=C|intergenic_region|MODIFIER|Sntg1-Gm24765|ENSMUSG00000025909-ENSMUSG00000065625|intergenic_region|ENSMUSG00000025909-ENSMUSG00000065625|||n.9389083delA||||||	GT:AD:AF:DP:F1R2:F2R1:SB	0/0:21,0:0.041:21:12,0:8,0:6,15,0,0	0/1:23,6:0.226:29:9,3:13,2:11,12,4,2	2985_T1
chr1	9397571	.	AC	A	.	PASS	AS_FilterStatus=SITE;AS_SB_TABLE=2,18|3,9;DP=41;ECNT=1;GERMQ=26;MBQ=35,34;MFRL=470,437;MMQ=60,60;MPOS=31;NALOD=1.15;NLOD=3.30;POPAF=6.00;RPA=11,10;RU=C;STR;STRQ=5;TLOD=20.19;ANN=A|intergenic_region|MODIFIER|Sntg1-Gm24765|ENSMUSG00000025909-ENSMUSG00000065625|intergenic_region|ENSMUSG00000025909-ENSMUSG00000065625|||n.9397572delC||||||	GT:AD:AF:DP:F1R2:F2R1:SB	0/0:11,0:0.068:11:2,0:7,0:2,9,0,0	0/1:9,12:0.539:21:2,6:7,6:0,9,3,9	613_T1
chr1	9414491	.	C	A	.	PASS	AS_FilterStatus=SITE;AS_SB_TABLE=34,23|4,1;DP=65;ECNT=1;GERMQ=93;MBQ=33,34;MFRL=441,481;MMQ=60,60;MPOS=9;NALOD=1.54;NLOD=9.88;POPAF=6.00;TLOD=13.01;ANN=A|intergenic_region|MODIFIER|Sntg1-Gm24765|ENSMUSG00000025909-ENSMUSG00000065625|intergenic_region|ENSMUSG00000025909-ENSMUSG00000065625|||n.9414491C>A||||||	GT:AD:AF:DP:F1R2:F2R1:SB	0/0:34,0:0.028:34:14,0:18,0:21,13,0,0	0/1:23,5:0.200:28:11,1:11,4:13,10,4,1	2985_T1
chr1	9416182	.	CTT	C	.	PASS	AS_FilterStatus=SITE;AS_SB_TABLE=23,16|2,1;DP=46;ECNT=1;GERMQ=85;MBQ=33,33;MFRL=450,563;MMQ=60,60;MPOS=38;NALOD=1.35;NLOD=6.00;POPAF=6.00;RPA=11,9;RU=T;STR;STRQ=93;TLOD=7.03;ANN=C|intergenic_region|MODIFIER|Sntg1-Gm24765|ENSMUSG00000025909-ENSMUSG00000065625|intergenic_region|ENSMUSG00000025909-ENSMUSG00000065625|||n.9416183_9416184delTT||||||	GT:AD:AF:DP:F1R2:F2R1:SB	0/0:20,0:0.043:20:8,0:12,0:13,7,0,0	0/1:19,3:0.166:22:10,1:8,2:10,9,2,1	3147_T1
chr1	9479206	.	C	T	.	PASS	AS_FilterStatus=SITE;AS_SB_TABLE=32,30|4,4;DP=73;ECNT=1;GERMQ=93;MBQ=34,34;MFRL=455,328;MMQ=60,60;MPOS=37;NALOD=1.60;NLOD=11.43;POPAF=6.00;TLOD=20.96;ANN=T|intergenic_region|MODIFIER|Gm24765-Rrs1|ENSMUSG00000065625-ENSMUSG00000061024|intergenic_region|ENSMUSG00000065625-ENSMUSG00000061024|||n.9479206C>T||||||	GT:AD:AF:DP:F1R2:F2R1:SB	0/0:39,0:0.024:39:20,0:18,0:19,20,0,0	0/1:23,8:0.250:31:13,6:9,2:13,10,4,4	613_T1
chr1	9481857	.	C	T	.	PASS	AS_FilterStatus=SITE;AS_SB_TABLE=29,24|2,1;DP=59;ECNT=1;GERMQ=93;MBQ=34,35;MFRL=436,544;MMQ=60,60;MPOS=57;NALOD=1.50;NLOD=9.02;POPAF=6.00;TLOD=7.18;ANN=T|intergenic_region|MODIFIER|Gm24765-Rrs1|ENSMUSG00000065625-ENSMUSG00000061024|intergenic_region|ENSMUSG00000065625-ENSMUSG00000061024|||n.9481857C>T||||||	GT:AD:AF:DP:F1R2:F2R1:SB	0/0:30,0:0.030:30:14,0:14,0:16,14,0,0	0/1:23,3:0.142:26:10,0:13,3:13,10,2,1	613_T1
chr1	9545657	.	AC	A	.	PASS	AS_FilterStatus=SITE;AS_SB_TABLE=65,52|5,2;DP=129;ECNT=1;GERMQ=93;MBQ=34,34;MFRL=411,431;MMQ=60,60;MPOS=27;NALOD=1.78;NLOD=17.14;POPAF=6.00;RPA=6,5;RU=C;STR;STRQ=93;TLOD=11.53;ANN=A|frameshift_variant|HIGH|Rrs1|ENSMUSG00000061024|transcript|ENSMUST00000072079|protein_coding|1/1|c.140delC|p.Pro47fs|256/2047|140/1098|47/365||INFO_REALIGN_3_PRIME,A|upstream_gene_variant|MODIFIER|Adhfe1|ENSMUSG000000…	GT:AD:AF:DP:F1R2:F2R1:SB	0/0:57,0:0.016:57:19,0:35,0:34,23,0,0	0/1:60,7:0.115:67:30,4:30,3:31,29,5,2	613_T1
chr1	9570659	.	T	A	.	PASS	AS_FilterStatus=SITE;AS_SB_TABLE=26,36|2,2;DP=67;ECNT=1;GERMQ=93;MBQ=34,36;MFRL=426,469;MMQ=60,60;MPOS=44;NALOD=1.54;NLOD=9.93;POPAF=6.00;TLOD=10.01;ANN=A|upstream_gene_variant|MODIFIER|Gm6161|ENSMUSG00000081441|transcript|ENSMUST00000121942|processed_pseudogene||n.-3889T>A|||||3889|,A|intron_variant|MODIFIER|Adhfe1|ENSMUSG00000025911|transcript|ENSMUST00000144177|protein_coding|13/13|c.1314+3721…	GT:AD:AF:DP:F1R2:F2R1:SB	0/0:35,0:0.028:35:15,0:20,0:15,20,0,0	0/1:27,4:0.151:31:14,2:13,2:11,16,2,2	3147_T1
chr1	9611149	.	ATGTG	A	.	PASS	AS_FilterStatus=SITE;AS_SB_TABLE=7,16|1,2;DP=44;ECNT=1;GERMQ=43;MBQ=34,35;MFRL=390,422;MMQ=60,60;MPOS=30;NALOD=1.00;NLOD=3.82;POPAF=6.00;RPA=23,21;RU=TG;STR;STRQ=93;TLOD=6.43;ANN=A|intron_variant|MODIFIER|2610203C22Rik|ENSMUSG00000079671|transcript|ENSMUST00000115480|protein_coding|3/4|c.33+8397_33+8400delCACA||||||,A|intron_variant|MODIFIER|3110035E14Rik|ENSMUSG00000067879|transcript|ENSMUST0000…	GT:AD:AF:DP:F1R2:F2R1:SB	0/0:13,0:0.054:13:2,0:9,0:3,10,0,0	0/1:10,3:0.288:13:4,1:5,2:4,6,1,2	2985_T1
chr1	9639626	.	G	T	.	PASS	AS_FilterStatus=SITE;AS_SB_TABLE=36,28|2,1;DP=68;ECNT=1;GERMQ=93;MBQ=34,35;MFRL=420,471;MMQ=60,60;MPOS=39;NALOD=1.54;NLOD=10.23;POPAF=6.00;TLOD=6.51;ANN=T|intergenic_region|MODIFIER|2610203C22Rik-Mybl1|ENSMUSG00000079671-ENSMUSG00000025912|intergenic_region|ENSMUSG00000079671-ENSMUSG00000025912|||n.9639626G>T||||||	GT:AD:AF:DP:F1R2:F2R1:SB	0/0:35,0:0.028:35:21,0:14,0:19,16,0,0	0/1:29,3:0.117:32:18,0:11,3:17,12,2,1	2985_T1
chr1	9690842	.	CAA	C	.	PASS	AS_FilterStatus=SITE;AS_SB_TABLE=12,15|3,2;DP=47;ECNT=1;GERMQ=48;MBQ=33,34;MFRL=396,482;MMQ=60,60;MPOS=51;NALOD=0.894;NLOD=4.58;POPAF=6.00;RPA=17,15;RU=A;STR;STRQ=93;TLOD=7.94;ANN=C|intron_variant|MODIFIER|Mybl1|ENSMUSG00000025912|transcript|ENSMUST00000088658|protein_coding|3/15|c.199-671_199-670delTT||||||	GT:AD:AF:DP:F1R2:F2R1:SB	0/0:16,0:0.049:16:7,0:5,0:6,10,0,0	0/1:11,5:0.339:16:4,2:4,3:6,5,3,2	2985_T1
chr1	9709015	.	CTT	C	.	PASS	AS_FilterStatus=SITE;AS_SB_TABLE=16,23|2,4;DP=60;ECNT=1;GERMQ=78;MBQ=33,34;MFRL=427,473;MMQ=60,60;MPOS=36;NALOD=1.24;NLOD=8.12;POPAF=6.00;RPA=19,17;RU=T;STR;STRQ=93;TLOD=9.03;ANN=C|intergenic_region|MODIFIER|Mybl1-Vcpip1|ENSMUSG00000025912-ENSMUSG00000045210|intergenic_region|ENSMUSG00000025912-ENSMUSG00000045210|||n.9709016_9709017delTT||||||	GT:AD:AF:DP:F1R2:F2R1:SB	0/0:28,0:0.030:28:8,0:18,0:13,15,0,0	0/1:11,6:0.363:17:4,5:6,1:3,8,2,4	3147_T1
chr1	9709015	.	CTTTT	C	.	PASS	AS_FilterStatus=SITE;AS_SB_TABLE=10,20|3,4;DP=49;ECNT=1;GERMQ=54;MBQ=35,33;MFRL=423,443;MMQ=60,60;MPOS=44;NALOD=0.958;NLOD=6.25;POPAF=6.00;RPA=19,15;RU=T;STR;STRQ=93;TLOD=8.66;ANN=C|intergenic_region|MODIFIER|Mybl1-Vcpip1|ENSMUSG00000025912-ENSMUSG00000045210|intergenic_region|ENSMUSG00000025912-ENSMUSG00000045210|||n.9709016_9709019delTTTT||||||	GT:AD:AF:DP:F1R2:F2R1:SB	0/0:21,0:0.039:21:8,0:12,0:9,12,0,0	0/1:9,7:0.445:16:2,2:6,5:1,8,3,4	2985_T1
chr1	9752916	.	C	T	.	PASS	AS_FilterStatus=SITE;AS_SB_TABLE=38,37|2,1;DP=79;ECNT=1;GERMQ=93;MBQ=29,35;MFRL=454,550;MMQ=60,60;MPOS=29;NALOD=1.61;NLOD=11.94;POPAF=6.00;TLOD=6.36;ANN=T|upstream_gene_variant|MODIFIER|Vcpip1|ENSMUSG00000045210|transcript|ENSMUST00000057438|protein_coding||c.-4760G>A|||||4534|,T|intron_variant|MODIFIER|1700034P13Rik|ENSMUSG00000097893|transcript|ENSMUST00000181821|lincRNA|2/3|n.1073+352C>T||||||	GT:AD:AF:DP:F1R2:F2R1:SB	0/0:40,0:0.024:40:20,0:17,0:19,21,0,0	0/1:35,3:0.102:38:14,2:21,1:19,16,2,1	613_T1
chr1	9837835	.	C	A	.	PASS	AS_FilterStatus=SITE;AS_SB_TABLE=23,23|1,3;DP=51;ECNT=1;GERMQ=93;MBQ=35,34;MFRL=420,485;MMQ=60,60;MPOS=33;NALOD=1.37;NLOD=6.23;POPAF=6.00;TLOD=9.38;ANN=A|upstream_gene_variant|MODIFIER|Gm22607|ENSMUSG00000088916|transcript|ENSMUST00000158291|snRNA||n.-3233G>T|||||3233|,A|intragenic_variant|MODIFIER|Sgk3|ENSMUSG00000025915|gene_variant|ENSMUSG00000025915|||n.9837835C>A||||||	GT:AD:AF:DP:F1R2:F2R1:SB	0/0:21,0:0.041:21:11,0:7,0:12,9,0,0	0/1:25,4:0.160:29:18,3:7,1:11,14,1,3	613_T1
chr1	9894483	.	CAA	C	.	PASS	AS_FilterStatus=SITE;AS_SB_TABLE=19,11|2,3;DP=44;ECNT=1;GERMQ=62;MBQ=34,35;MFRL=417,419;MMQ=60,60;MPOS=31;NALOD=1.14;NLOD=6.45;POPAF=6.00;RPA=16,14;RU=A;STR;STRQ=93;TLOD=13.86;ANN=C|intron_variant|MODIFIER|Sgk3|ENSMUSG00000025915|transcript|ENSMUST00000097826|protein_coding|16/16|c.1320+3048_1320+3049delAA||||||INFO_REALIGN_3_PRIME	GT:AD:AF:DP:F1R2:F2R1:SB	0/0:22,0:0.037:22:12,0:9,0:15,7,0,0	0/1:8,5:0.397:13:5,3:2,2:4,4,2,3	2985_T1
chr1	9915281	.	AT	A	.	PASS	AS_FilterStatus=SITE;AS_SB_TABLE=27,27|1,3;DP=63;ECNT=1;GERMQ=93;MBQ=34,34;MFRL=447,476;MMQ=60,60;MPOS=59;NALOD=1.48;NLOD=8.42;POPAF=6.00;RPA=6,5;RU=T;STR;STRQ=93;TLOD=6.78;ANN=A|intron_variant|MODIFIER|Mcmdc2|ENSMUSG00000046101|transcript|ENSMUST00000140948|protein_coding|4/15|c.286-187delT||||||INFO_REALIGN_3_PRIME	GT:AD:AF:DP:F1R2:F2R1:SB	0/0:28,0:0.032:28:13,0:15,0:12,16,0,0	0/1:26,4:0.155:30:13,2:12,1:15,11,1,3	2985_T1
chr1	9949142	.	C	A	.	PASS	AS_FilterStatus=SITE;AS_SB_TABLE=37,30|5,3;DP=79;ECNT=1;GERMQ=93;MBQ=32,34;MFRL=471,424;MMQ=60,60;MPOS=40;NALOD=1.65;NLOD=12.89;POPAF=6.00;TLOD=23.16;ANN=A|intergenic_region|MODIFIER|Snhg6-Tcf24|ENSMUSG00000098234-ENSMUSG00000099032|intergenic_region|ENSMUSG00000098234-ENSMUSG00000099032|||n.9949142C>A||||||	GT:AD:AF:DP:F1R2:F2R1:SB	0/0:43,0:0.022:43:20,0:22,0:21,22,0,0	0/1:24,8:0.264:32:12,5:11,3:16,8,5,3	613_T1
chr1	9975894	.	CT	C	.	PASS	AS_FilterStatus=SITE;AS_SB_TABLE=33,32|1,4;DP=77;ECNT=1;GERMQ=93;MBQ=33,36;MFRL=461,479;MMQ=60,60;MPOS=51;NALOD=1.58;NLOD=10.82;POPAF=6.00;RPA=7,6;RU=T;STR;STRQ=93;TLOD=8.58;ANN=C|intron_variant|MODIFIER|Ppp1r42|ENSMUSG00000025916|transcript|ENSMUST00000027049|protein_coding|8/8|c.962+692delA||||||	GT:AD:AF:DP:F1R2:F2R1:SB	0/0:36,0:0.026:36:21,0:15,0:20,16,0,0	0/1:29,5:0.165:34:14,0:15,5:13,16,1,4	613_T1
chr1	10065703	.	GC	G	.	PASS	AS_FilterStatus=SITE;AS_SB_TABLE=29,39|5,2;DP=80;ECNT=1;GERMQ=93;MBQ=34,35;MFRL=397,412;MMQ=60,60;MPOS=53;NALOD=1.51;NLOD=9.02;POPAF=6.00;RPA=5,4;RU=C;STR;STRQ=93;TLOD=13.81;ANN=G|intron_variant|MODIFIER|Cspp1|ENSMUSG00000056763|transcript|ENSMUST00000071087|protein_coding|6/29|c.486+287delC||||||INFO_REALIGN_3_PRIME	GT:AD:AF:DP:F1R2:F2R1:SB	0/0:31,0:0.030:31:21,0:9,0:18,13,0,0	0/1:37,7:0.177:44:17,4:18,3:11,26,5,2	2985_T1
chr1	10090065	.	CTT	C	.	PASS	AS_FilterStatus=SITE;AS_SB_TABLE=13,10|0,4;DP=33;ECNT=1;GERMQ=43;MBQ=32,37;MFRL=440,457;MMQ=60,60;MPOS=57;NALOD=0.998;NLOD=4.21;POPAF=6.00;RPA=15,13;RU=T;STR;STRQ=93;TLOD=6.95;ANN=C|intron_variant|MODIFIER|Cspp1|ENSMUSG00000056763|transcript|ENSMUST00000071087|protein_coding|14/29|c.1611-109_1611-108delTT||||||INFO_REALIGN_3_PRIME	GT:AD:AF:DP:F1R2:F2R1:SB	0/0:14,0:0.055:14:8,0:5,0:10,4,0,0	0/1:9,4:0.330:13:5,1:4,3:3,6,0,4	3147_T1
chr1	10161172	.	CTT	C	.	PASS	AS_FilterStatus=SITE;AS_SB_TABLE=37,17|4,4;DP=76;ECNT=1;GERMQ=93;MBQ=33,33;MFRL=443,408;MMQ=60,60;MPOS=38;NALOD=1.24;NLOD=8.71;POPAF=6.00;RPA=15,13;RU=T;STR;STRQ=93;TLOD=15.68;ANN=C|intron_variant|MODIFIER|Arfgef1|ENSMUSG00000067851|transcript|ENSMUST00000088615|protein_coding|22/37|c.3372-171_3372-170delAA||||||	GT:AD:AF:DP:F1R2:F2R1:SB	0/0:29,0:0.029:29:14,0:12,0:19,10,0,0	0/1:25,8:0.255:33:10,1:12,7:18,7,4,4	613_T1
chr1	10250691	.	C	A	.	PASS	AS_FilterStatus=SITE;AS_SB_TABLE=44,30|2,5;DP=83;ECNT=1;GERMQ=93;MBQ=33,35;MFRL=450,366;MMQ=60,60;MPOS=46;NALOD=1.68;NLOD=13.75;POPAF=6.00;TLOD=19.38;ANN=A|intergenic_region|MODIFIER|Arfgef1-Cpa6|ENSMUSG00000067851-ENSMUSG00000042501|intergenic_region|ENSMUSG00000067851-ENSMUSG00000042501|||n.10250691C>A||||||	GT:AD:AF:DP:F1R2:F2R1:SB	0/0:46,0:0.021:46:22,0:21,0:29,17,0,0	0/1:28,7:0.229:35:15,3:13,4:15,13,2,5	613_T1
chr1	10303616	.	C	T	.	PASS	AS_FilterStatus=SITE;AS_SB_TABLE=30,27|5,3;DP=69;ECNT=1;GERMQ=93;MBQ=33,35;MFRL=476,410;MMQ=60,60;MPOS=40;NALOD=1.49;NLOD=8.68;POPAF=6.00;TLOD=22.37;ANN=T|intergenic_region|MODIFIER|Arfgef1-Cpa6|ENSMUSG00000067851-ENSMUSG00000042501|intergenic_region|ENSMUSG00000067851-ENSMUSG00000042501|||n.10303616C>T||||||	GT:AD:AF:DP:F1R2:F2R1:SB	0/0:29,0:0.032:29:14,0:14,0:14,15,0,0	0/1:28,8:0.237:36:9,4:18,4:16,12,5,3	613_T1
chr1	10317251	.	TA	T	.	PASS	AS_FilterStatus=SITE;AS_SB_TABLE=32,14|2,1;DP=51;ECNT=1;GERMQ=93;MBQ=34,34;MFRL=417,364;MMQ=60,60;MPOS=24;NALOD=1.53;NLOD=9.01;POPAF=6.00;RPA=7,6;RU=A;STR;STRQ=93;TLOD=5.11;ANN=T|intergenic_region|MODIFIER|Arfgef1-Cpa6|ENSMUSG00000067851-ENSMUSG00000042501|intergenic_region|ENSMUSG00000067851-ENSMUSG00000042501|||n.10317252delA||||||	GT:AD:AF:DP:F1R2:F2R1:SB	0/0:30,0:0.029:30:15,0:13,0:22,8,0,0	0/1:16,3:0.197:19:6,2:8,1:10,6,2,1	613_T1
chr1	10350828	.	G	T	.	PASS	AS_FilterStatus=SITE;AS_SB_TABLE=10,23|0,5;DP=41;ECNT=1;GERMQ=58;MBQ=34,34;MFRL=425,417;MMQ=60,60;MPOS=58;NALOD=1.25;NLOD=4.82;POPAF=6.00;TLOD=13.14;ANN=T|intron_variant|MODIFIER|Cpa6|ENSMUSG00000042501|transcript|ENSMUST00000035577|protein_coding|8/10|c.842-13359C>A||||||	GT:AD:AF:DP:F1R2:F2R1:SB	0/0:16,0:0.053:16:3,0:13,0:5,11,0,0	0/1:17,5:0.250:22:7,2:10,3:5,12,0,5	3147_T1
chr1	10354449	.	AT	A	.	PASS	AS_FilterStatus=SITE;AS_SB_TABLE=29,19|4,2;DP=62;ECNT=1;GERMQ=93;MBQ=34,34;MFRL=406,440;MMQ=60,60;MPOS=25;NALOD=1.56;NLOD=9.92;POPAF=6.00;RPA=6,5;RU=T;STR;STRQ=93;TLOD=12.89;ANN=A|intron_variant|MODIFIER|Cpa6|ENSMUSG00000042501|transcript|ENSMUST00000035577|protein_coding|8/10|c.842-16981delA||||||	GT:AD:AF:DP:F1R2:F2R1:SB	0/0:33,0:0.027:33:18,0:14,0:17,16,0,0	0/1:15,6:0.303:21:9,2:6,4:12,3,4,2	2985_T1
chr1	10354549	.	CT	C	.	PASS	AS_FilterStatus=SITE;AS_SB_TABLE=48,30|4,0;DP=87;ECNT=1;GERMQ=93;MBQ=34,34;MFRL=441,414;MMQ=60,60;MPOS=36;NALOD=1.63;NLOD=11.71;POPAF=6.00;RPA=7,6;RU=T;STR;STRQ=93;TLOD=6.84;ANN=C|intron_variant|MODIFIER|Cpa6|ENSMUSG00000042501|transcript|ENSMUST00000035577|protein_coding|8/10|c.842-17081delA||||||	GT:AD:AF:DP:F1R2:F2R1:SB	0/0:42,0:0.023:42:18,0:23,0:25,17,0,0	0/1:36,4:0.118:40:16,0:19,3:23,13,4,0	613_T1
chr1	10438991	.	CAA	C	.	PASS	AS_FilterStatus=SITE;AS_SB_TABLE=19,9|2,2;DP=41;ECNT=2;GERMQ=63;MBQ=32,29;MFRL=445,602;MMQ=60,60;MPOS=33;NALOD=0.941;NLOD=6.30;POPAF=6.00;RPA=18,16;RU=A;STR;STRQ=93;TLOD=7.66;ANN=C|intron_variant|MODIFIER|Cpa6|ENSMUSG00000042501|transcript|ENSMUST00000035577|protein_coding|6/10|c.640-29626_640-29625delTT||||||	GT:AD:AF:DP:F1R2:F2R1:SB	0/0:21,0:0.040:21:8,0:9,0:15,6,0,0	0/1:7,4:0.405:11:3,2:4,1:4,3,2,2	613_T1
chr1	10446273	.	C	A	.	PASS	AS_FilterStatus=SITE;AS_SB_TABLE=31,28|3,3;DP=66;ECNT=1;GERMQ=93;MBQ=34,34;MFRL=428,515;MMQ=60,60;MPOS=38;NALOD=1.53;NLOD=9.93;POPAF=6.00;TLOD=16.00;ANN=A|intron_variant|MODIFIER|Cpa6|ENSMUSG00000042501|transcript|ENSMUST00000035577|protein_coding|6/10|c.639+30752G>T||||||	GT:AD:AF:DP:F1R2:F2R1:SB	0/0:34,0:0.029:34:19,0:15,0:16,18,0,0	0/1:25,6:0.213:31:13,2:11,4:15,10,3,3	2985_T1
chr1	10528949	.	CTT	C	.	PASS	AS_FilterStatus=SITE;AS_SB_TABLE=15,16|0,4;DP=51;ECNT=1;GERMQ=64;MBQ=34,35;MFRL=442,597;MMQ=60,60;MPOS=21;NALOD=0.954;NLOD=6.06;POPAF=6.00;RPA=17,15;RU=T;STR;STRQ=93;TLOD=5.82;ANN=C|intron_variant|MODIFIER|Cpa6|ENSMUSG00000042501|transcript|ENSMUST00000035577|protein_coding|2/10|c.193-40002_193-40001delAA||||||	GT:AD:AF:DP:F1R2:F2R1:SB	0/0:21,0:0.041:21:10,0:8,0:10,11,0,0	0/1:10,4:0.307:14:5,1:4,2:5,5,0,4	2985_T1
chr1	10558131	.	CA	C	.	PASS	AS_FilterStatus=SITE;AS_SB_TABLE=27,30|5,2;DP=71;ECNT=1;GERMQ=93;MBQ=33,32;MFRL=428,461;MMQ=60,60;MPOS=31;NALOD=1.65;NLOD=12.32;POPAF=6.00;RPA=6,5;RU=A;STR;STRQ=93;TLOD=15.52;ANN=C|upstream_gene_variant|MODIFIER|Gm15604|ENSMUSG00000083422|transcript|ENSMUST00000118350|processed_pseudogene||n.-2579delT|||||2579|,C|upstream_gene_variant|MODIFIER|Gm25253|ENSMUSG00000094979|transcript|ENSMUST00000179…	GT:AD:AF:DP:F1R2:F2R1:SB	0/0:41,0:0.022:41:19,0:22,0:18,23,0,0	0/1:16,7:0.319:23:6,3:9,3:9,7,5,2	2985_T1
chr1	10597566	.	CG	C	.	PASS	AS_FilterStatus=SITE;AS_SB_TABLE=9,8|5,6;DP=33;ECNT=1;GERMQ=31;MBQ=33,28;MFRL=473,439;MMQ=60,60;MPOS=26;NALOD=0.720;NLOD=3.56;POPAF=6.00;RPA=12,11;RU=G;STR;STRQ=11;TLOD=20.09;ANN=C|intron_variant|MODIFIER|Cpa6|ENSMUSG00000042501|transcript|ENSMUST00000035577|protein_coding|1/10|c.117-1872delC||||||	GT:AD:AF:DP:F1R2:F2R1:SB	0/0:12,0:0.068:12:5,0:5,0:6,6,0,0	0/1:5,11:0.673:16:2,1:2,7:3,2,5,6	3147_T1
chr1	10618403	.	A	G	.	PASS	AS_FilterStatus=SITE;AS_SB_TABLE=33,22|3,2;DP=60;ECNT=1;GERMQ=93;MBQ=34,28;MFRL=442,414;MMQ=60,60;MPOS=24;NALOD=1.43;NLOD=7.43;POPAF=6.00;TLOD=7.41;ANN=G|intron_variant|MODIFIER|Cpa6|ENSMUSG00000042501|transcript|ENSMUST00000035577|protein_coding|1/10|c.117-22708T>C||||||	GT:AD:AF:DP:F1R2:F2R1:SB	0/0:25,0:0.036:25:9,0:14,0:15,10,0,0	0/1:30,5:0.151:35:18,3:11,1:18,12,3,2	613_T1
chr1	10649640	.	C	T	.	PASS	AS_FilterStatus=SITE;AS_SB_TABLE=30,25|3,4;DP=65;ECNT=1;GERMQ=93;MBQ=32,34;MFRL=445,446;MMQ=60,60;MPOS=50;NALOD=1.46;NLOD=8.42;POPAF=6.00;TLOD=19.68;ANN=T|intron_variant|MODIFIER|Cpa6|ENSMUSG00000042501|transcript|ENSMUST00000035577|protein_coding|1/10|c.117-53945G>A||||||	GT:AD:AF:DP:F1R2:F2R1:SB	0/0:28,0:0.033:28:14,0:13,0:18,10,0,0	0/1:27,7:0.228:34:9,3:18,4:12,15,3,4	3147_T1
chr1	10658850	.	TAAA	T	.	PASS	AS_FilterStatus=SITE;AS_SB_TABLE=13,15|5,1;DP=42;ECNT=1;GERMQ=42;MBQ=34,36;MFRL=478,431;MMQ=60,60;MPOS=44;NALOD=0.855;NLOD=4.97;POPAF=6.00;RPA=20,17;RU=A;STR;STRQ=93;TLOD=7.13;ANN=T|intron_variant|MODIFIER|Cpa6|ENSMUSG00000042501|transcript|ENSMUST00000035577|protein_coding|1/10|c.116+60759_116+60761delTTT||||||	GT:AD:AF:DP:F1R2:F2R1:SB	0/0:17,0:0.049:17:5,0:7,0:9,8,0,0	0/1:11,6:0.349:17:1,3:5,2:4,7,5,1	613_T1
chr1	10667154	.	GAAA	G	.	PASS	AS_FilterStatus=SITE;AS_SB_TABLE=19,14|1,4;DP=51;ECNT=1;GERMQ=60;MBQ=35,33;MFRL=414,496;MMQ=60,60;MPOS=46;NALOD=1.15;NLOD=6.41;POPAF=6.00;RPA=19,16;RU=A;STR;STRQ=93;TLOD=9.67;ANN=G|intron_variant|MODIFIER|Cpa6|ENSMUSG00000042501|transcript|ENSMUST00000035577|protein_coding|1/10|c.116+52455_116+52457delTTT||||||	GT:AD:AF:DP:F1R2:F2R1:SB	0/0:22,0:0.037:22:9,0:12,0:11,11,0,0	0/1:11,5:0.325:16:3,4:7,1:8,3,1,4	613_T1
chr1	10691853	.	TA	T	.	PASS	AS_FilterStatus=SITE;AS_SB_TABLE=41,39|1,3;DP=89;ECNT=1;GERMQ=93;MBQ=34,34;MFRL=478,333;MMQ=60,60;MPOS=52;NALOD=1.70;NLOD=14.12;POPAF=6.00;RPA=6,5;RU=A;STR;STRQ=93;TLOD=6.34;ANN=T|upstream_gene_variant|MODIFIER|Gm15603|ENSMUSG00000081417|transcript|ENSMUST00000119252|processed_pseudogene||n.-3269delA|||||3269|,T|intron_variant|MODIFIER|Cpa6|ENSMUSG00000042501|transcript|ENSMUST00000035577|protein…	GT:AD:AF:DP:F1R2:F2R1:SB	0/0:47,0:0.020:47:25,0:21,0:24,23,0,0	0/1:33,4:0.127:37:16,3:15,1:17,16,1,3	613_T1
chr1	10698166	.	C	T	.	PASS	AS_FilterStatus=SITE;AS_SB_TABLE=23,22|2,6;DP=53;ECNT=1;GERMQ=84;MBQ=33,33;MFRL=406,465;MMQ=60,60;MPOS=39;NALOD=1.48;NLOD=8.68;POPAF=6.00;TLOD=23.03;ANN=T|downstream_gene_variant|MODIFIER|Gm15603|ENSMUSG00000081417|transcript|ENSMUST00000119252|processed_pseudogene||n.*2552C>T|||||2552|,T|intron_variant|MODIFIER|Cpa6|ENSMUSG00000042501|transcript|ENSMUST00000035577|protein_coding|1/10|c.116+21446…	GT:AD:AF:DP:F1R2:F2R1:SB	0/0:29,0:0.032:29:10,0:18,0:15,14,0,0	0/1:16,8:0.348:24:5,3:11,5:8,8,2,6	3147_T1
chr1	10722295	.	AGTGT	A	.	PASS	AS_FilterStatus=SITE;AS_SB_TABLE=12,19|1,2;DP=59;ECNT=1;GERMQ=62;MBQ=36,35;MFRL=415,308;MMQ=60,60;MPOS=37;NALOD=1.41;NLOD=5.34;POPAF=6.00;RPA=21,19;RU=GT;STR;STRQ=93;TLOD=6.97;ANN=A|upstream_gene_variant|MODIFIER|Cpa6|ENSMUSG00000042501|transcript|ENSMUST00000035577|protein_coding||c.-2572_-2569delACAC|||||2351|,A|intergenic_region|MODIFIER|Cpa6-Gm22963|ENSMUSG00000042501-ENSMUSG00000088585|inter…	GT:AD:AF:DP:F1R2:F2R1:SB	0/0:19,0:0.041:19:5,0:9,0:7,12,0,0	0/1:12,3:0.229:15:5,0:5,2:5,7,1,2	2985_T1
chr1	10736932	.	G	T	.	PASS	AS_FilterStatus=SITE;AS_SB_TABLE=32,20|2,2;DP=56;ECNT=1;GERMQ=93;MBQ=36,35;MFRL=454,402;MMQ=40,60;MPOS=58;NALOD=1.46;NLOD=8.43;POPAF=6.00;TLOD=9.94;ANN=T|intergenic_region|MODIFIER|Cpa6-Gm22963|ENSMUSG00000042501-ENSMUSG00000088585|intergenic_region|ENSMUSG00000042501-ENSMUSG00000088585|||n.10736932G>T||||||	GT:AD:AF:DP:F1R2:F2R1:SB	0/0:28,0:0.033:28:12,0:16,0:18,10,0,0	0/1:24,4:0.167:28:11,2:12,2:14,10,2,2	2985_T1
chr1	10786260	.	A	G	.	PASS	AS_FilterStatus=SITE;AS_SB_TABLE=39,51|1,2;DP=98;ECNT=1;GERMQ=93;MBQ=35,33;MFRL=410,466;MMQ=60,60;MPOS=22;NALOD=1.68;NLOD=13.85;POPAF=6.00;TLOD=6.20;ANN=G|intergenic_region|MODIFIER|Cpa6-Gm22963|ENSMUSG00000042501-ENSMUSG00000088585|intergenic_region|ENSMUSG00000042501-ENSMUSG00000088585|||n.10786260A>G||||||	GT:AD:AF:DP:F1R2:F2R1:SB	0/0:48,0:0.021:48:30,0:18,0:20,28,0,0	0/1:42,3:0.088:45:18,1:24,2:19,23,1,2	613_T1
chr1	10883573	.	AT	A	.	PASS	AS_FilterStatus=SITE;AS_SB_TABLE=36,29|4,3;DP=79;ECNT=1;GERMQ=93;MBQ=34,35;MFRL=448,410;MMQ=60,60;MPOS=63;NALOD=1.54;NLOD=9.62;POPAF=6.00;RPA=6,5;RU=T;STR;STRQ=93;TLOD=13.40;ANN=A|intergenic_region|MODIFIER|Cpa6-Gm22963|ENSMUSG00000042501-ENSMUSG00000088585|intergenic_region|ENSMUSG00000042501-ENSMUSG00000088585|||n.10883574delT||||||	GT:AD:AF:DP:F1R2:F2R1:SB	0/0:32,0:0.028:32:12,0:18,0:20,12,0,0	0/1:33,7:0.189:40:17,3:15,4:16,17,4,3	613_T1
chr1	10907622	.	T	C	.	PASS	AS_FilterStatus=SITE;AS_SB_TABLE=56,32|1,2;DP=96;ECNT=1;GERMQ=93;MBQ=35,35;MFRL=441,379;MMQ=60,60;MPOS=26;NALOD=1.66;NLOD=13.54;POPAF=6.00;TLOD=5.84;ANN=C|intergenic_region|MODIFIER|Cpa6-Gm22963|ENSMUSG00000042501-ENSMUSG00000088585|intergenic_region|ENSMUSG00000042501-ENSMUSG00000088585|||n.10907622T>C||||||	GT:AD:AF:DP:F1R2:F2R1:SB	0/0:46,0:0.021:46:20,0:26,0:29,17,0,0	0/1:42,3:0.086:45:22,2:19,1:27,15,1,2	613_T1
chr1	10939311	.	T	C	.	PASS	AS_FilterStatus=SITE;AS_SB_TABLE=36,31|1,3;DP=71;ECNT=1;GERMQ=93;MBQ=34,37;MFRL=452,457;MMQ=60,60;MPOS=49;NALOD=1.60;NLOD=11.74;POPAF=6.00;TLOD=10.18;ANN=C|intergenic_region|MODIFIER|Gm22963-Prex2|ENSMUSG00000088585-ENSMUSG00000048960|intergenic_region|ENSMUSG00000088585-ENSMUSG00000048960|||n.10939311T>C||||||	GT:AD:AF:DP:F1R2:F2R1:SB	0/0:39,0:0.024:39:18,0:21,0:21,18,0,0	0/1:28,4:0.156:32:13,1:15,3:15,13,1,3	613_T1
chr1	10945871	.	GTT	G	.	PASS	AS_FilterStatus=SITE;AS_SB_TABLE=14,5|4,2;DP=37;ECNT=1;GERMQ=29;MBQ=35,35;MFRL=447,482;MMQ=60,60;MPOS=51;NALOD=0.991;NLOD=3.31;POPAF=6.00;RPA=22,20;RU=T;STR;STRQ=93;TLOD=7.46;ANN=G|intergenic_region|MODIFIER|Gm22963-Prex2|ENSMUSG00000088585-ENSMUSG00000048960|intergenic_region|ENSMUSG00000088585-ENSMUSG00000048960|||n.10945872_10945873delTT||||||	GT:AD:AF:DP:F1R2:F2R1:SB	0/0:11,0:0.062:11:7,0:3,0:10,1,0,0	0/1:8,6:0.435:14:2,3:3,3:4,4,4,2	613_T1
chr1	10990161	.	T	C	.	PASS	AS_FilterStatus=SITE;AS_SB_TABLE=34,42|2,1;DP=79;ECNT=1;GERMQ=93;MBQ=34,33;MFRL=442,407;MMQ=60,60;MPOS=58;NALOD=1.64;NLOD=12.94;POPAF=6.00;TLOD=6.17;ANN=C|upstream_gene_variant|MODIFIER|Prex2|ENSMUSG00000048960|transcript|ENSMUST00000027056|protein_coding||c.-3632T>C|||||3304|,C|intergenic_region|MODIFIER|Gm22963-Prex2|ENSMUSG00000088585-ENSMUSG00000048960|intergenic_region|ENSMUSG00000088585-ENS…	GT:AD:AF:DP:F1R2:F2R1:SB	0/0:43,0:0.022:43:23,0:20,0:25,18,0,0	0/1:33,3:0.108:36:19,1:13,2:9,24,2,1	2985_T1
chr1	10995871	.	CT	C	.	PASS	AS_FilterStatus=SITE;AS_SB_TABLE=19,34|3,2;DP=65;ECNT=1;GERMQ=93;MBQ=36,34;MFRL=456,542;MMQ=60,60;MPOS=47;NALOD=1.51;NLOD=9.01;POPAF=6.00;RPA=7,6;RU=T;STR;STRQ=93;TLOD=9.08;ANN=C|intron_variant|MODIFIER|Prex2|ENSMUSG00000048960|transcript|ENSMUST00000027056|protein_coding|1/39|c.117+1969delT||||||INFO_REALIGN_3_PRIME	GT:AD:AF:DP:F1R2:F2R1:SB	0/0:30,0:0.030:30:12,0:17,0:11,19,0,0	0/1:23,5:0.198:28:10,2:13,3:8,15,3,2	613_T1
chr1	11021444	.	GA	G	.	PASS	AS_FilterStatus=SITE;AS_SB_TABLE=21,31|4,4;DP=62;ECNT=1;GERMQ=93;MBQ=33,35;MFRL=465,414;MMQ=60,60;MPOS=31;NALOD=1.59;NLOD=11.12;POPAF=6.00;RPA=5,4;RU=A;STR;STRQ=93;TLOD=19.20;ANN=G|intron_variant|MODIFIER|Prex2|ENSMUSG00000048960|transcript|ENSMUST00000027056|protein_coding|1/39|c.117+27540delA||||||INFO_REALIGN_3_PRIME	GT:AD:AF:DP:F1R2:F2R1:SB	0/0:37,0:0.025:37:22,0:13,0:16,21,0,0	0/1:15,8:0.359:23:6,5:8,3:5,10,4,4	3147_T1
chr1	11030579	.	A	G	.	PASS	AS_FilterStatus=SITE;AS_SB_TABLE=13,14|0,3;DP=30;ECNT=2;GERMQ=52;MBQ=34,33;MFRL=437,356;MMQ=32,35;MPOS=8;NALOD=1.18;NLOD=4.21;POPAF=6.00;TLOD=8.56;ANN=G|intron_variant|MODIFIER|Prex2|ENSMUSG00000048960|transcript|ENSMUST00000027056|protein_coding|1/39|c.118-30747A>G||||||	GT:AD:AF:DP:F1R2:F2R1:PGT:PID:PS:SB	0|0:14,0:0.063:14:6,0:8,0:0|1:11030579_A_G:11030579:4,10,0,0	0|1:13,3:0.222:16:4,1:9,2:0|1:11030579_A_G:11030579:9,4,0,3	3147_T1
chr1	11038112	.	GGTGT	G	.	PASS	AS_FilterStatus=SITE;AS_SB_TABLE=12,19|2,1;DP=54;ECNT=1;GERMQ=66;MBQ=34,37;MFRL=454,462;MMQ=60,60;MPOS=20;NALOD=1.05;NLOD=4.78;POPAF=6.00;RPA=22,20;RU=GT;STR;STRQ=93;TLOD=5.66;ANN=G|intron_variant|MODIFIER|Prex2|ENSMUSG00000048960|transcript|ENSMUST00000027056|protein_coding|1/39|c.118-23172_118-23169delTGTG||||||INFO_REALIGN_3_PRIME	GT:AD:AF:DP:F1R2:F2R1:SB	0/0:16,0:0.047:16:6,0:5,0:5,11,0,0	0/1:15,3:0.202:18:6,1:6,2:7,8,2,1	613_T1
chr1	11150458	.	G	A	.	PASS	AS_FilterStatus=SITE;AS_SB_TABLE=23,7|4,0;DP=36;ECNT=2;GERMQ=57;MBQ=28,34;MFRL=456,423;MMQ=60,60;MPOS=52;NALOD=1.34;NLOD=5.11;POPAF=6.00;TLOD=10.86;ANN=A|intron_variant|MODIFIER|Prex2|ENSMUSG00000048960|transcript|ENSMUST00000027056|protein_coding|19/39|c.2089+563G>A||||||	GT:AD:AF:DP:F1R2:F2R1:SB	0/0:17,0:0.046:17:10,0:6,0:13,4,0,0	0/1:13,4:0.263:17:6,1:5,3:10,3,4,0	3147_T1
chr1	11163580	.	GTT	G	.	PASS	AS_FilterStatus=SITE;AS_SB_TABLE=26,39|1,2;DP=77;ECNT=1;GERMQ=93;MBQ=32,31;MFRL=450,422;MMQ=60,60;MPOS=32;NALOD=1.58;NLOD=10.51;POPAF=6.00;RPA=11,9;RU=T;STR;STRQ=93;TLOD=6.32;ANN=G|intron_variant|MODIFIER|Prex2|ENSMUSG00000048960|transcript|ENSMUST00000027056|protein_coding|23/39|c.2691+1189_2691+1190delTT||||||INFO_REALIGN_3_PRIME	GT:AD:AF:DP:F1R2:F2R1:SB	0/0:35,0:0.026:35:11,0:18,0:15,20,0,0	0/1:30,3:0.115:33:9,2:13,0:11,19,1,2	613_T1
chr1	11168591	.	G	T	.	PASS	AS_FilterStatus=SITE;AS_SB_TABLE=33,24|3,1;DP=63;ECNT=1;GERMQ=93;MBQ=36,36;MFRL=469,436;MMQ=60,60;MPOS=19;NALOD=1.54;NLOD=9.89;POPAF=6.00;TLOD=10.41;ANN=T|intron_variant|MODIFIER|Prex2|ENSMUSG00000048960|transcript|ENSMUST00000027056|protein_coding|23/39|c.2692-1262G>T||||||	GT:AD:AF:DP:F1R2:F2R1:SB	0/0:33,0:0.028:33:19,0:13,0:19,14,0,0	0/1:24,4:0.172:28:15,2:9,2:14,10,3,1	2985_T1
chr1	11213089	.	A	G	.	PASS	AS_FilterStatus=SITE;AS_SB_TABLE=37,31|4,2;DP=75;ECNT=1;GERMQ=93;MBQ=35,28;MFRL=430,412;MMQ=60,60;MPOS=26;NALOD=1.52;NLOD=9.63;POPAF=6.00;TLOD=11.89;ANN=G|intron_variant|MODIFIER|Prex2|ENSMUSG00000048960|transcript|ENSMUST00000027056|protein_coding|34/39|c.4207+4434A>G||||||	GT:AD:AF:DP:F1R2:F2R1:SB	0/0:33,0:0.029:33:14,0:19,0:20,13,0,0	0/1:35,6:0.162:41:13,4:22,2:17,18,4,2	613_T1
chr1	11287543	.	C	T	.	PASS	AS_FilterStatus=SITE;AS_SB_TABLE=21,34|0,4;DP=61;ECNT=1;GERMQ=93;MBQ=36,33;MFRL=441,410;MMQ=60,60;MPOS=56;NALOD=1.25;NLOD=9.94;POPAF=6.00;TLOD=9.86;ANN=T|intron_variant|MODIFIER|Prex2|ENSMUSG00000048960|transcript|ENSMUST00000027056|protein_coding|38/39|c.4684-1710C>T||||||	GT:AD:AF:DP:F1R2:F2R1:SB	0/0:33,0:0.028:33:14,0:19,0:10,23,0,0	0/1:22,4:0.176:26:6,2:16,2:11,11,0,4	3147_T1
chr1	11298244	.	T	C	.	PASS	AS_FilterStatus=SITE;AS_SB_TABLE=36,32|3,1;DP=74;ECNT=1;GERMQ=93;MBQ=34,35;MFRL=419,463;MMQ=60,60;MPOS=32;NALOD=1.60;NLOD=11.39;POPAF=6.00;TLOD=9.70;ANN=C|3_prime_UTR_variant|MODIFIER|Prex2|ENSMUSG00000048960|transcript|ENSMUST00000027056|protein_coding|40/40|c.*491T>C|||||491|	GT:AD:AF:DP:F1R2:F2R1:SB	0/0:38,0:0.025:38:15,0:22,0:19,19,0,0	0/1:30,4:0.139:34:18,3:12,1:17,13,3,1	2985_T1
chr1	11370497	.	G	T	.	PASS	AS_FilterStatus=SITE;AS_SB_TABLE=39,35|4,6;DP=85;ECNT=1;GERMQ=93;MBQ=33,35;MFRL=468,472;MMQ=60,60;MPOS=43;NALOD=1.66;NLOD=13.20;POPAF=6.00;TLOD=28.51;ANN=T|intergenic_region|MODIFIER|Prex2-A830018L16Rik|ENSMUSG00000048960-ENSMUSG00000057715|intergenic_region|ENSMUSG00000048960-ENSMUSG00000057715|||n.11370497G>T||||||	GT:AD:AF:DP:F1R2:F2R1:SB	0/0:44,0:0.022:44:15,0:28,0:25,19,0,0	0/1:30,10:0.263:40:14,5:13,5:14,16,4,6	613_T1
chr1	11437846	.	CGTGT	C	.	PASS	AS_FilterStatus=SITE;AS_SB_TABLE=10,15|2,1;DP=45;ECNT=1;GERMQ=45;MBQ=29,33;MFRL=448,434;MMQ=60,60;MPOS=19;NALOD=0.619;NLOD=3.44;POPAF=6.00;RPA=21,19;RU=GT;STR;STRQ=93;TLOD=7.04;ANN=C|intron_variant|MODIFIER|A830018L16Rik|ENSMUSG00000095719|transcript|ENSMUST00000179089|protein_coding|1/3|c.-300+23248_-300+23251delGTGT||||||INFO_REALIGN_3_PRIME,C|intron_variant|MODIFIER|A830018L16Rik|ENSMUSG000000…	GT:AD:AF:DP:F1R2:F2R1:SB	0/0:12,0:0.059:12:6,0:6,0:6,6,0,0	0/1:13,3:0.218:16:4,3:5,0:4,9,2,1	2985_T1
chr1	11462406	.	GT	G	.	PASS	AS_FilterStatus=SITE;AS_SB_TABLE=19,14|3,3;DP=42;ECNT=1;GERMQ=59;MBQ=34,34;MFRL=449,400;MMQ=60,60;MPOS=55;NALOD=1.30;NLOD=5.41;POPAF=6.00;RPA=4,3;RU=T;STR;STRQ=93;TLOD=14.76;ANN=G|intron_variant|MODIFIER|A830018L16Rik|ENSMUSG00000095719|transcript|ENSMUST00000179089|protein_coding|1/3|c.-300+47773delT||||||INFO_REALIGN_3_PRIME,G|intron_variant|MODIFIER|A830018L16Rik|ENSMUSG00000057715|transcript|…	GT:AD:AF:DP:F1R2:F2R1:SB	0/0:18,0:0.048:18:6,0:12,0:10,8,0,0	0/1:15,6:0.318:21:6,2:8,4:9,6,3,3	3147_T1
chr1	11479851	.	G	T	.	PASS	AS_FilterStatus=SITE;AS_SB_TABLE=28,34|3,2;DP=69;ECNT=1;GERMQ=93;MBQ=33,35;MFRL=427,481;MMQ=60,60;MPOS=39;NALOD=1.53;NLOD=9.93;POPAF=6.00;TLOD=13.04;ANN=T|intron_variant|MODIFIER|A830018L16Rik|ENSMUSG00000095719|transcript|ENSMUST00000179089|protein_coding|1/3|c.-299-32067G>T||||||,T|intron_variant|MODIFIER|A830018L16Rik|ENSMUSG00000057715|transcript|ENSMUST00000137824|protein_coding|1/13|c.70-32…	GT:AD:AF:DP:F1R2:F2R1:SB	0/0:36,0:0.029:36:17,0:19,0:18,18,0,0	0/1:26,5:0.181:31:10,2:16,3:10,16,3,2	2985_T1
chr1	11517539	.	TCACA	T	.	PASS	AS_FilterStatus=SITE;AS_SB_TABLE=11,25|3,2;DP=52;ECNT=1;GERMQ=69;MBQ=35,32;MFRL=430,414;MMQ=60,60;MPOS=34;NALOD=0.949;NLOD=5.39;POPAF=6.00;RPA=18,16;RU=CA;STR;STRQ=93;TLOD=5.49;ANN=T|intron_variant|MODIFIER|A830018L16Rik|ENSMUSG00000095719|transcript|ENSMUST00000179089|protein_coding|2/3|c.-151-1006_-151-1003delCACA||||||INFO_REALIGN_3_PRIME,T|intron_variant|MODIFIER|A830018L16Rik|ENSMUSG00000057…	GT:AD:AF:DP:F1R2:F2R1:SB	0/0:18,0:0.040:18:3,0:10,0:5,13,0,0	0/1:18,5:0.239:23:3,1:8,1:6,12,3,2	613_T1
chr1	11530800	.	AT	A	.	PASS	AS_FilterStatus=SITE;AS_SB_TABLE=26,28|2,4;DP=65;ECNT=1;GERMQ=93;MBQ=34,34;MFRL=438,547;MMQ=60,60;MPOS=25;NALOD=1.58;NLOD=10.21;POPAF=6.00;RPA=7,6;RU=T;STR;STRQ=93;TLOD=11.90;ANN=A|intron_variant|MODIFIER|A830018L16Rik|ENSMUSG00000095719|transcript|ENSMUST00000179089|protein_coding|3/3|c.-19-6208delT||||||INFO_REALIGN_3_PRIME,A|intron_variant|MODIFIER|A830018L16Rik|ENSMUSG00000057715|transcript|E…	GT:AD:AF:DP:F1R2:F2R1:SB	0/0:34,0:0.026:34:20,0:13,0:18,16,0,0	0/1:20,6:0.249:26:8,2:11,4:8,12,2,4	2985_T1
chr1	11580740	.	G	A	.	PASS	AS_FilterStatus=SITE;AS_SB_TABLE=35,33|1,2;DP=72;ECNT=2;GERMQ=93;MBQ=34,34;MFRL=413,71;MMQ=60,60;MPOS=49;NALOD=1.62;NLOD=12.29;POPAF=6.00;TLOD=6.97;ANN=A|intron_variant|MODIFIER|A830018L16Rik|ENSMUSG00000057715|transcript|ENSMUST00000137824|protein_coding|5/13|c.508-7634G>A||||||	GT:AD:AF:DP:F1R2:F2R1:SB	0/0:43,0:0.023:43:15,0:27,0:23,20,0,0	0/1:25,3:0.103:28:13,2:12,1:12,13,1,2	2985_T1
chr1	11598178	.	TA	T	.	PASS	AS_FilterStatus=SITE;AS_SB_TABLE=33,18|5,5;DP=63;ECNT=1;GERMQ=93;MBQ=34,34;MFRL=435,448;MMQ=60,60;MPOS=55;NALOD=1.59;NLOD=10.51;POPAF=6.00;RPA=6,5;RU=A;STR;STRQ=93;TLOD=20.17;ANN=T|intron_variant|MODIFIER|A830018L16Rik|ENSMUSG00000057715|transcript|ENSMUST00000137824|protein_coding|7/13|c.847+1867delA||||||INFO_REALIGN_3_PRIME	GT:AD:AF:DP:F1R2:F2R1:SB	0/0:35,0:0.025:35:23,0:12,0:21,14,0,0	0/1:16,10:0.370:26:6,5:10,5:12,4,5,5	2985_T1
chr1	11605844	.	C	T	.	PASS	AS_FilterStatus=SITE;AS_SB_TABLE=29,30|2,3;DP=66;ECNT=1;GERMQ=93;MBQ=35,35;MFRL=404,417;MMQ=60,60;MPOS=50;NALOD=1.57;NLOD=10.23;POPAF=6.00;TLOD=11.72;ANN=T|intron_variant|MODIFIER|A830018L16Rik|ENSMUSG00000057715|transcript|ENSMUST00000137824|protein_coding|7/13|c.847+9527C>T||||||	GT:AD:AF:DP:F1R2:F2R1:SB	0/0:34,0:0.027:34:17,0:17,0:19,15,0,0	0/1:25,5:0.186:30:14,3:11,2:10,15,2,3	2985_T1
chr1	11624875	.	TG	T	.	PASS	AS_FilterStatus=SITE;AS_SB_TABLE=34,29|2,2;DP=70;ECNT=1;GERMQ=93;MBQ=35,36;MFRL=447,403;MMQ=44,42;MPOS=59;NALOD=1.38;NLOD=6.61;POPAF=6.00;RPA=5,4;RU=G;STR;STRQ=93;TLOD=6.28;ANN=T|intron_variant|MODIFIER|A830018L16Rik|ENSMUSG00000057715|transcript|ENSMUST00000137824|protein_coding|7/13|c.847+28563delG||||||INFO_REALIGN_3_PRIME	GT:AD:AF:DP:F1R2:F2R1:SB	0/0:22,0:0.040:22:11,0:9,0:12,10,0,0	0/1:41,4:0.108:45:25,4:14,0:22,19,2,2	613_T1
chr1	11655071	.	G	A	.	PASS	AS_FilterStatus=SITE;AS_SB_TABLE=33,31|2,2;DP=71;ECNT=1;GERMQ=93;MBQ=31,36;MFRL=445,458;MMQ=60,60;MPOS=32;NALOD=1.56;NLOD=10.48;POPAF=6.00;TLOD=10.05;ANN=A|intron_variant|MODIFIER|A830018L16Rik|ENSMUSG00000057715|transcript|ENSMUST00000137824|protein_coding|7/13|c.847+58754G>A||||||	GT:AD:AF:DP:F1R2:F2R1:SB	0/0:35,0:0.027:35:24,0:10,0:19,16,0,0	0/1:29,4:0.142:33:13,3:16,1:14,15,2,2	613_T1
chr1	11659062	.	A	G	.	PASS	AS_FilterStatus=SITE;AS_SB_TABLE=17,18|5,2;DP=43;ECNT=1;GERMQ=68;MBQ=35,28;MFRL=456,406;MMQ=60,60;MPOS=36;NALOD=1.43;NLOD=7.82;POPAF=6.00;TLOD=18.94;ANN=G|intron_variant|MODIFIER|A830018L16Rik|ENSMUSG00000057715|transcript|ENSMUST00000137824|protein_coding|7/13|c.847+62745A>G||||||	GT:AD:AF:DP:F1R2:F2R1:SB	0/0:26,0:0.036:26:18,0:8,0:12,14,0,0	0/1:9,7:0.444:16:5,3:4,4:5,4,5,2	3147_T1
chr1	11674089	.	G	A	.	PASS	AS_FilterStatus=SITE;AS_SB_TABLE=11,23|3,1;DP=39;ECNT=1;GERMQ=70;MBQ=33,20;MFRL=403,262;MMQ=60,60;MPOS=4;NALOD=1.33;NLOD=6.01;POPAF=6.00;TLOD=6.09;ANN=A|intron_variant|MODIFIER|A830018L16Rik|ENSMUSG00000057715|transcript|ENSMUST00000137824|protein_coding|7/13|c.848-73876G>A||||||	GT:AD:AF:DP:F1R2:F2R1:SB	0/0:20,0:0.045:20:11,0:6,0:4,16,0,0	0/1:14,4:0.194:18:7,3:6,0:7,7,3,1	2985_T1
chr1	11683918	.	CA	C	.	PASS	AS_FilterStatus=SITE;AS_SB_TABLE=24,22|2,5;DP=56;ECNT=1;GERMQ=91;MBQ=33,36;MFRL=416,347;MMQ=60,60;MPOS=46;NALOD=1.43;NLOD=7.52;POPAF=6.00;RPA=6,5;RU=A;STR;STRQ=93;TLOD=14.26;ANN=C|intron_variant|MODIFIER|A830018L16Rik|ENSMUSG00000057715|transcript|ENSMUST00000137824|protein_coding|7/13|c.848-64041delA||||||INFO_REALIGN_3_PRIME	GT:AD:AF:DP:F1R2:F2R1:SB	0/0:25,0:0.036:25:11,0:12,0:16,9,0,0	0/1:21,7:0.266:28:10,4:10,3:8,13,2,5	2985_T1
chr1	11704197	.	C	T	.	PASS	AS_FilterStatus=SITE;AS_SB_TABLE=22,28|2,2;DP=56;ECNT=1;GERMQ=93;MBQ=29,34;MFRL=424,533;MMQ=60,60;MPOS=44;NALOD=1.46;NLOD=8.42;POPAF=6.00;TLOD=7.44;ANN=T|intron_variant|MODIFIER|A830018L16Rik|ENSMUSG00000057715|transcript|ENSMUST00000137824|protein_coding|7/13|c.848-43768C>T||||||	GT:AD:AF:DP:F1R2:F2R1:SB	0/0:29,0:0.033:29:15,0:14,0:14,15,0,0	0/1:21,4:0.171:25:13,2:8,1:8,13,2,2	3147_T1
chr1	11729728	.	G	A	.	PASS	AS_FilterStatus=SITE;AS_SB_TABLE=16,1|5,2;DP=24;ECNT=1;GERMQ=27;MBQ=35,35;MFRL=457,193;MMQ=40,40;MPOS=12;NALOD=1.11;NLOD=3.61;POPAF=6.00;TLOD=25.71;ANN=A|intron_variant|MODIFIER|A830018L16Rik|ENSMUSG00000057715|transcript|ENSMUST00000137824|protein_coding|7/13|c.848-18237G>A||||||	GT:AD:AF:DP:F1R2:F2R1:SB	0/0:12,0:0.071:12:3,0:8,0:11,1,0,0	0/1:5,7:0.538:12:2,3:3,3:5,0,5,2	3147_T1
chr1	11788719	.	TAAA	T	.	PASS	AS_FilterStatus=SITE;AS_SB_TABLE=25,28|4,2;DP=67;ECNT=1;GERMQ=93;MBQ=34,35;MFRL=424,414;MMQ=60,60;MPOS=20;NALOD=1.52;NLOD=9.59;POPAF=6.00;RPA=13,10;RU=A;STR;STRQ=93;TLOD=20.22;ANN=T|intron_variant|MODIFIER|A830018L16Rik|ENSMUSG00000057715|transcript|ENSMUST00000137824|protein_coding|8/13|c.984-9751_984-9749delAAA||||||INFO_REALIGN_3_PRIME	GT:AD:AF:DP:F1R2:F2R1:SB	0/0:32,0:0.029:32:12,0:17,0:15,17,0,0	0/1:21,6:0.253:27:9,6:10,0:10,11,4,2	613_T1
chr1	11791121	.	TA	T	.	PASS	AS_FilterStatus=SITE;AS_SB_TABLE=33,42|2,4;DP=85;ECNT=1;GERMQ=93;MBQ=34,34;MFRL=458,354;MMQ=60,60;MPOS=49;NALOD=1.56;NLOD=10.22;POPAF=6.00;RPA=7,6;RU=A;STR;STRQ=93;TLOD=10.00;ANN=T|intron_variant|MODIFIER|A830018L16Rik|ENSMUSG00000057715|transcript|ENSMUST00000137824|protein_coding|8/13|c.984-7353delA||||||INFO_REALIGN_3_PRIME	GT:AD:AF:DP:F1R2:F2R1:SB	0/0:34,0:0.027:34:22,0:12,0:15,19,0,0	0/1:41,6:0.142:47:18,2:23,4:18,23,2,4	613_T1
chr1	11794895	.	A	G	.	PASS	AS_FilterStatus=SITE;AS_SB_TABLE=24,27|6,4;DP=64;ECNT=1;GERMQ=93;MBQ=35,28;MFRL=419,417;MMQ=60,60;MPOS=32;NALOD=1.53;NLOD=9.63;POPAF=6.00;TLOD=25.49;ANN=G|intron_variant|MODIFIER|A830018L16Rik|ENSMUSG00000057715|transcript|ENSMUST00000137824|protein_coding|8/13|c.984-3586A>G||||||	GT:AD:AF:DP:F1R2:F2R1:SB	0/0:32,0:0.029:32:21,0:11,0:14,18,0,0	0/1:19,10:0.355:29:14,2:5,8:10,9,6,4	2985_T1
chr1	11864947	.	GTCTC	G	.	PASS	AS_FilterStatus=SITE;AS_SB_TABLE=11,9|5,0;DP=34;ECNT=1;GERMQ=30;MBQ=36,36;MFRL=422,462;MMQ=60,60;MPOS=65;NALOD=0.888;NLOD=3.27;POPAF=6.00;RPA=25,23;RU=TC;STR;STRQ=93;TLOD=17.80;ANN=G|intron_variant|MODIFIER|A830018L16Rik|ENSMUSG00000057715|transcript|ENSMUST00000137824|protein_coding|10/13|c.1146+35104_1146+35107delCTCT||||||INFO_REALIGN_3_PRIME	GT:AD:AF:DP:F1R2:F2R1:SB	0/0:11,0:0.067:11:4,0:3,0:7,4,0,0	0/1:9,5:0.383:14:3,1:2,4:4,5,5,0	613_T1
chr1	11865441	.	C	A	.	PASS	AS_FilterStatus=SITE;AS_SB_TABLE=29,28|2,1;DP=61;ECNT=1;GERMQ=93;MBQ=34,34;MFRL=441,544;MMQ=60,60;MPOS=35;NALOD=1.40;NLOD=7.22;POPAF=6.00;TLOD=6.32;ANN=A|intron_variant|MODIFIER|A830018L16Rik|ENSMUSG00000057715|transcript|ENSMUST00000137824|protein_coding|10/13|c.1146+35550C>A||||||	GT:AD:AF:DP:F1R2:F2R1:SB	0/0:24,0:0.038:24:12,0:11,0:13,11,0,0	0/1:33,3:0.106:36:13,1:16,2:16,17,2,1	613_T1
chr1	11970884	.	AT	A	.	PASS	AS_FilterStatus=SITE;AS_SB_TABLE=30,22|2,4;DP=61;ECNT=1;GERMQ=93;MBQ=34,34;MFRL=447,485;MMQ=60,60;MPOS=28;NALOD=1.55;NLOD=9.61;POPAF=6.00;RPA=7,6;RU=T;STR;STRQ=93;TLOD=12.04;ANN=A|intron_variant|MODIFIER|A830018L16Rik|ENSMUSG00000057715|transcript|ENSMUST00000137824|protein_coding|12/13|c.1289-1155delT||||||INFO_REALIGN_3_PRIME	GT:AD:AF:DP:F1R2:F2R1:SB	0/0:33,0:0.028:33:17,0:16,0:19,14,0,0	0/1:19,6:0.259:25:6,4:12,2:11,8,2,4	2985_T1
chr1	12023941	.	G	A	.	PASS	AS_FilterStatus=SITE;AS_SB_TABLE=36,21|6,4;DP=67;ECNT=1;GERMQ=93;MBQ=36,34;MFRL=445,407;MMQ=60,60;MPOS=46;NALOD=1.51;NLOD=9.33;POPAF=6.00;TLOD=28.95;ANN=A|intergenic_region|MODIFIER|A830018L16Rik-Gm22633|ENSMUSG00000057715-ENSMUSG00000093864|intergenic_region|ENSMUSG00000057715-ENSMUSG00000093864|||n.12023941G>A||||||	GT:AD:AF:DP:F1R2:F2R1:SB	0/0:32,0:0.030:32:15,0:17,0:20,12,0,0	0/1:25,10:0.297:35:11,5:14,5:16,9,6,4	2985_T1
chr1	12069600	.	GTT	G	.	PASS	AS_FilterStatus=SITE;AS_SB_TABLE=16,22|1,3;DP=59;ECNT=1;GERMQ=84;MBQ=32,26;MFRL=451,480;MMQ=60,60;MPOS=37;NALOD=1.14;NLOD=6.90;POPAF=6.00;RPA=17,15;RU=T;STR;STRQ=93;TLOD=9.32;ANN=G|intergenic_region|MODIFIER|A830018L16Rik-Gm22633|ENSMUSG00000057715-ENSMUSG00000093864|intergenic_region|ENSMUSG00000057715-ENSMUSG00000093864|||n.12069601_12069602delTT||||||	GT:AD:AF:DP:F1R2:F2R1:SB	0/0:23,0:0.036:23:10,0:7,0:11,12,0,0	0/1:15,4:0.238:19:2,2:7,1:5,10,1,3	613_T1
chr1	12123980	.	CTGTG	C	.	PASS	AS_FilterStatus=SITE;AS_SB_TABLE=15,25|1,2;DP=66;ECNT=1;GERMQ=90;MBQ=33,35;MFRL=399,422;MMQ=60,60;MPOS=55;NALOD=1.12;NLOD=8.34;POPAF=6.00;RPA=21,19;RU=TG;STR;STRQ=93;TLOD=5.56;ANN=C|intergenic_region|MODIFIER|A830018L16Rik-Gm22633|ENSMUSG00000057715-ENSMUSG00000093864|intergenic_region|ENSMUSG00000057715-ENSMUSG00000093864|||n.12123981_12123984delTGTG||||||	GT:AD:AF:DP:F1R2:F2R1:SB	0/0:29,0:0.028:29:11,0:8,0:10,19,0,0	0/1:11,3:0.246:14:3,2:5,1:5,6,1,2	2985_T1
chr1	12192897	.	CTT	C	.	PASS	AS_FilterStatus=SITE;AS_SB_TABLE=20,16|3,4;DP=52;ECNT=1;GERMQ=77;MBQ=34,25;MFRL=473,488;MMQ=60,60;MPOS=19;NALOD=0.870;NLOD=8.30;POPAF=6.00;RPA=18,16;RU=T;STR;STRQ=93;TLOD=11.20;ANN=C|intergenic_region|MODIFIER|A830018L16Rik-Gm22633|ENSMUSG00000057715-ENSMUSG00000093864|intergenic_region|ENSMUSG00000057715-ENSMUSG00000093864|||n.12192898_12192899delTT||||||	GT:AD:AF:DP:F1R2:F2R1:SB	0/0:28,0:0.030:28:11,0:12,0:12,16,0,0	0/1:8,7:0.471:15:5,2:3,3:8,0,3,4	2985_T1
chr1	12219350	.	A	T	.	PASS	AS_FilterStatus=SITE;AS_SB_TABLE=4,19|0,4;DP=29;ECNT=1;GERMQ=43;MBQ=36,35;MFRL=503,532;MMQ=40,40;MPOS=31;NALOD=1.20;NLOD=4.21;POPAF=6.00;TLOD=11.71;ANN=T|intergenic_region|MODIFIER|A830018L16Rik-Gm22633|ENSMUSG00000057715-ENSMUSG00000093864|intergenic_region|ENSMUSG00000057715-ENSMUSG00000093864|||n.12219350A>T||||||	GT:AD:AF:DP:F1R2:F2R1:SB	0/0:14,0:0.060:14:5,0:9,0:2,12,0,0	0/1:9,4:0.333:13:6,3:3,1:2,7,0,4	2985_T1
chr1	12222913	.	C	T	.	PASS	AS_FilterStatus=SITE;AS_SB_TABLE=19,24|2,2;DP=49;ECNT=1;GERMQ=87;MBQ=28,35;MFRL=417,426;MMQ=48,38;MPOS=36;NALOD=1.39;NLOD=6.83;POPAF=6.00;TLOD=9.67;ANN=T|intergenic_region|MODIFIER|A830018L16Rik-Gm22633|ENSMUSG00000057715-ENSMUSG00000093864|intergenic_region|ENSMUSG00000057715-ENSMUSG00000093864|||n.12222913C>T||||||	GT:AD:AF:DP:F1R2:F2R1:SB	0/0:24,0:0.040:24:12,0:10,0:9,15,0,0	0/1:19,4:0.199:23:9,1:10,3:10,9,2,2	3147_T1
chr1	12234213	.	G	A	.	PASS	AS_FilterStatus=SITE;AS_SB_TABLE=33,30|5,1;DP=70;ECNT=1;GERMQ=93;MBQ=28,34;MFRL=470,495;MMQ=60,60;MPOS=60;NALOD=1.56;NLOD=10.48;POPAF=6.00;TLOD=14.49;ANN=A|intergenic_region|MODIFIER|A830018L16Rik-Gm22633|ENSMUSG00000057715-ENSMUSG00000093864|intergenic_region|ENSMUSG00000057715-ENSMUSG00000093864|||n.12234213G>A||||||	GT:AD:AF:DP:F1R2:F2R1:SB	0/0:36,0:0.027:36:18,0:17,0:15,21,0,0	0/1:27,6:0.200:33:17,5:10,1:18,9,5,1	2985_T1
chr1	12257959	.	GAA	G	.	PASS	AS_FilterStatus=SITE;AS_SB_TABLE=24,31|2,1;DP=68;ECNT=1;GERMQ=93;MBQ=34,34;MFRL=448,451;MMQ=60,60;MPOS=23;NALOD=1.65;NLOD=12.34;POPAF=6.00;RPA=12,10;RU=A;STR;STRQ=93;TLOD=7.53;ANN=G|intergenic_region|MODIFIER|A830018L16Rik-Gm22633|ENSMUSG00000057715-ENSMUSG00000093864|intergenic_region|ENSMUSG00000057715-ENSMUSG00000093864|||n.12257960_12257961delAA||||||	GT:AD:AF:DP:F1R2:F2R1:SB	0/0:43,0:0.022:43:27,0:14,0:19,24,0,0	0/1:12,3:0.231:15:6,2:6,1:5,7,2,1	2985_T1
chr1	12258885	.	G	A	.	PASS	AS_FilterStatus=SITE;AS_SB_TABLE=30,29|3,5;DP=70;ECNT=1;GERMQ=93;MBQ=35,34;MFRL=440,437;MMQ=60,60;MPOS=33;NALOD=1.55;NLOD=10.23;POPAF=6.00;TLOD=21.06;ANN=A|intergenic_region|MODIFIER|A830018L16Rik-Gm22633|ENSMUSG00000057715-ENSMUSG00000093864|intergenic_region|ENSMUSG00000057715-ENSMUSG00000093864|||n.12258885G>A||||||	GT:AD:AF:DP:F1R2:F2R1:SB	0/0:34,0:0.027:34:18,0:16,0:20,14,0,0	0/1:25,8:0.264:33:14,3:11,5:10,15,3,5	2985_T1
chr1	12316170	.	C	T	.	PASS	AS_FilterStatus=SITE;AS_SB_TABLE=26,10|1,2;DP=42;ECNT=1;GERMQ=79;MBQ=33,20;MFRL=414,222;MMQ=60,60;MPOS=27;NALOD=1.34;NLOD=5.88;POPAF=6.00;TLOD=5.33;ANN=T|intergenic_region|MODIFIER|A830018L16Rik-Gm22633|ENSMUSG00000057715-ENSMUSG00000093864|intergenic_region|ENSMUSG00000057715-ENSMUSG00000093864|||n.12316170C>T||||||	GT:AD:AF:DP:F1R2:F2R1:SB	0/0:20,0:0.044:20:8,0:9,0:15,5,0,0	0/1:16,3:0.149:19:7,3:8,0:11,5,1,2	613_T1
chr1	12323189	.	G	A	.	PASS	AS_FilterStatus=SITE;AS_SB_TABLE=43,29|2,2;DP=78;ECNT=1;GERMQ=93;MBQ=35,34;MFRL=457,446;MMQ=60,60;MPOS=38;NALOD=1.50;NLOD=9.28;POPAF=6.00;TLOD=8.82;ANN=A|intergenic_region|MODIFIER|A830018L16Rik-Gm22633|ENSMUSG00000057715-ENSMUSG00000093864|intergenic_region|ENSMUSG00000057715-ENSMUSG00000093864|||n.12323189G>A||||||	GT:AD:AF:DP:F1R2:F2R1:SB	0/0:31,0:0.030:31:13,0:16,0:18,13,0,0	0/1:41,4:0.109:45:26,3:14,1:25,16,2,2	613_T1
chr1	12366612	.	A	G	.	PASS	AS_FilterStatus=SITE;AS_SB_TABLE=20,28|3,2;DP=55;ECNT=1;GERMQ=93;MBQ=36,35;MFRL=449,435;MMQ=60,60;MPOS=43;NALOD=1.46;NLOD=8.13;POPAF=6.00;TLOD=13.64;ANN=G|intergenic_region|MODIFIER|A830018L16Rik-Gm22633|ENSMUSG00000057715-ENSMUSG00000093864|intergenic_region|ENSMUSG00000057715-ENSMUSG00000093864|||n.12366612A>G||||||	GT:AD:AF:DP:F1R2:F2R1:SB	0/0:27,0:0.034:27:19,0:8,0:9,18,0,0	0/1:21,5:0.222:26:11,3:10,2:11,10,3,2	3147_T1
chr1	12370881	.	G	A	.	PASS	AS_FilterStatus=SITE;AS_SB_TABLE=19,20|2,1;DP=42;ECNT=1;GERMQ=88;MBQ=33,33;MFRL=429,473;MMQ=60,60;MPOS=47;NALOD=1.13;NLOD=7.18;POPAF=6.00;TLOD=7.47;ANN=A|upstream_gene_variant|MODIFIER|Gm22633|ENSMUSG00000093864|transcript|ENSMUST00000179834|snRNA||n.-4055G>A|||||4055|,A|intergenic_region|MODIFIER|A830018L16Rik-Gm22633|ENSMUSG00000057715-ENSMUSG00000093864|intergenic_region|ENSMUSG00000057715-ENS…	GT:AD:AF:DP:F1R2:F2R1:SB	0/0:24,0:0.037:24:15,0:8,0:13,11,0,0	0/1:15,3:0.199:18:7,2:8,1:6,9,2,1	2985_T1
chr1	12404261	.	CA	C	.	PASS	AS_FilterStatus=SITE;AS_SB_TABLE=28,33|1,3;DP=70;ECNT=1;GERMQ=93;MBQ=36,36;MFRL=438,382;MMQ=60,60;MPOS=21;NALOD=1.57;NLOD=10.22;POPAF=6.00;RPA=4,3;RU=A;STR;STRQ=93;TLOD=7.83;ANN=C|intergenic_region|MODIFIER|Gm22633-mmu-mir-6341|ENSMUSG00000093864-ENSMUSG00000098555|intergenic_region|ENSMUSG00000093864-ENSMUSG00000098555|||n.12404262delA||||||	GT:AD:AF:DP:F1R2:F2R1:SB	0/0:34,0:0.027:34:21,0:13,0:13,21,0,0	0/1:27,4:0.155:31:13,1:14,3:15,12,1,3	2985_T1
chr1	12423418	.	C	T	.	PASS	AS_FilterStatus=SITE;AS_SB_TABLE=22,29|2,3;DP=56;ECNT=1;GERMQ=93;MBQ=29,34;MFRL=410,393;MMQ=60,60;MPOS=35;NALOD=1.43;NLOD=7.82;POPAF=6.00;TLOD=13.14;ANN=T|upstream_gene_variant|MODIFIER|mmu-mir-6341|ENSMUSG00000098555|transcript|ENSMUST00000183490|miRNA||n.-2568C>T|||||2568|,T|intergenic_region|MODIFIER|Gm22633-mmu-mir-6341|ENSMUSG00000093864-ENSMUSG00000098555|intergenic_region|ENSMUSG0000009386…	GT:AD:AF:DP:F1R2:F2R1:SB	0/0:26,0:0.036:26:14,0:12,0:9,17,0,0	0/1:25,5:0.187:30:12,3:13,2:13,12,2,3	3147_T1
chr1	12446147	.	G	T	.	PASS	AS_FilterStatus=SITE;AS_SB_TABLE=29,34|4,2;DP=73;ECNT=1;GERMQ=93;MBQ=33,34;MFRL=443,387;MMQ=60,60;MPOS=29;NALOD=1.61;NLOD=11.74;POPAF=6.00;TLOD=15.98;ANN=T|intergenic_region|MODIFIER|mmu-mir-6341-Gm2383|ENSMUSG00000098555-ENSMUSG00000097628|intergenic_region|ENSMUSG00000098555-ENSMUSG00000097628|||n.12446147G>T||||||	GT:AD:AF:DP:F1R2:F2R1:SB	0/0:39,0:0.024:39:19,0:19,0:17,22,0,0	0/1:24,6:0.218:30:14,2:10,4:12,12,4,2	2985_T1
chr1	12468026	.	C	T	.	PASS	AS_FilterStatus=SITE;AS_SB_TABLE=17,31|3,0;DP=51;ECNT=1;GERMQ=93;MBQ=35,36;MFRL=454,418;MMQ=60,60;MPOS=50;NALOD=1.45;NLOD=8.12;POPAF=6.00;TLOD=7.60;ANN=T|intergenic_region|MODIFIER|mmu-mir-6341-Gm2383|ENSMUSG00000098555-ENSMUSG00000097628|intergenic_region|ENSMUSG00000098555-ENSMUSG00000097628|||n.12468026C>T||||||	GT:AD:AF:DP:F1R2:F2R1:SB	0/0:28,0:0.034:28:20,0:7,0:10,18,0,0	0/1:20,3:0.160:23:8,3:12,0:7,13,3,0	3147_T1
chr1	12480042	.	AT	A	.	PASS	AS_FilterStatus=SITE;AS_SB_TABLE=33,20|2,3;DP=65;ECNT=1;GERMQ=93;MBQ=34,34;MFRL=448,393;MMQ=60,60;MPOS=25;NALOD=1.43;NLOD=7.21;POPAF=6.00;RPA=7,6;RU=T;STR;STRQ=93;TLOD=8.65;ANN=A|intergenic_region|MODIFIER|mmu-mir-6341-Gm2383|ENSMUSG00000098555-ENSMUSG00000097628|intergenic_region|ENSMUSG00000098555-ENSMUSG00000097628|||n.12480043delT||||||	GT:AD:AF:DP:F1R2:F2R1:SB	0/0:25,0:0.036:25:13,0:11,0:15,10,0,0	0/1:28,5:0.170:33:13,2:14,3:18,10,2,3	613_T1
chr1	12501117	.	TA	T	.	PASS	AS_FilterStatus=SITE;AS_SB_TABLE=24,31|2,2;DP=61;ECNT=1;GERMQ=93;MBQ=34,35;MFRL=458,418;MMQ=60,60;MPOS=38;NALOD=1.55;NLOD=10.22;POPAF=6.00;RPA=7,6;RU=A;STR;STRQ=93;TLOD=6.95;ANN=T|intergenic_region|MODIFIER|mmu-mir-6341-Gm2383|ENSMUSG00000098555-ENSMUSG00000097628|intergenic_region|ENSMUSG00000098555-ENSMUSG00000097628|||n.12501118delA||||||	GT:AD:AF:DP:F1R2:F2R1:SB	0/0:34,0:0.027:34:15,0:19,0:19,15,0,0	0/1:21,4:0.184:25:14,2:7,2:5,16,2,2	613_T1
chr1	12502329	.	GA	G	.	PASS	AS_FilterStatus=SITE;AS_SB_TABLE=19,16|5,6;DP=56;ECNT=1;GERMQ=73;MBQ=36,34;MFRL=401,410;MMQ=60,60;MPOS=25;NALOD=1.51;NLOD=7.76;POPAF=6.00;RPA=15,14;RU=A;STR;STRQ=3;TLOD=21.88;ANN=G|intergenic_region|MODIFIER|mmu-mir-6341-Gm2383|ENSMUSG00000098555-ENSMUSG00000097628|intergenic_region|ENSMUSG00000098555-ENSMUSG00000097628|||n.12502330delA||||||	GT:AD:AF:DP:F1R2:F2R1:SB	0/0:26,0:0.031:26:13,0:12,0:14,12,0,0	0/1:9,11:0.548:20:4,6:5,5:5,4,5,6	2985_T1
chr1	12504858	.	G	T	.	PASS	AS_FilterStatus=SITE;AS_SB_TABLE=31,26|2,3;DP=63;ECNT=1;GERMQ=93;MBQ=34,34;MFRL=446,421;MMQ=60,60;MPOS=22;NALOD=1.48;NLOD=8.73;POPAF=6.00;TLOD=12.58;ANN=T|intergenic_region|MODIFIER|mmu-mir-6341-Gm2383|ENSMUSG00000098555-ENSMUSG00000097628|intergenic_region|ENSMUSG00000098555-ENSMUSG00000097628|||n.12504858G>T||||||	GT:AD:AF:DP:F1R2:F2R1:SB	0/0:30,0:0.032:30:13,0:17,0:17,13,0,0	0/1:27,5:0.177:32:14,3:11,2:14,13,2,3	2985_T1
chr1	12521046	.	C	A	.	PASS	AS_FilterStatus=SITE;AS_SB_TABLE=23,33|2,7;DP=67;ECNT=1;GERMQ=93;MBQ=36,35;MFRL=422,436;MMQ=60,60;MPOS=43;NALOD=1.45;NLOD=8.13;POPAF=6.00;TLOD=23.81;ANN=A|intergenic_region|MODIFIER|mmu-mir-6341-Gm2383|ENSMUSG00000098555-ENSMUSG00000097628|intergenic_region|ENSMUSG00000098555-ENSMUSG00000097628|||n.12521046C>A||||||	GT:AD:AF:DP:F1R2:F2R1:SB	0/0:27,0:0.034:27:14,0:13,0:8,19,0,0	0/1:29,9:0.243:38:12,3:17,5:15,14,2,7	2985_T1
chr1	12548760	.	CTGTG	C	.	PASS	AS_FilterStatus=SITE;AS_SB_TABLE=9,11|2,3;DP=45;ECNT=1;GERMQ=30;MBQ=33,33;MFRL=469,476;MMQ=60,60;MPOS=42;NALOD=0.999;NLOD=3.85;POPAF=6.00;RPA=27,25;RU=TG;STR;STRQ=93;TLOD=15.31;ANN=C|intergenic_region|MODIFIER|mmu-mir-6341-Gm2383|ENSMUSG00000098555-ENSMUSG00000097628|intergenic_region|ENSMUSG00000098555-ENSMUSG00000097628|||n.12548761_12548764delTGTG||||||	GT:AD:AF:DP:F1R2:F2R1:SB	0/0:13,0:0.053:13:4,0:5,0:7,6,0,0	0/1:7,5:0.429:12:3,1:1,4:2,5,2,3	3147_T1
chr1	12584715	.	A	G	.	PASS	AS_FilterStatus=SITE;AS_SB_TABLE=42,42|3,0;DP=92;ECNT=1;GERMQ=93;MBQ=35,36;MFRL=467,416;MMQ=60,60;MPOS=48;NALOD=1.63;NLOD=12.04;POPAF=6.00;TLOD=6.37;ANN=G|intergenic_region|MODIFIER|Gm2383-Gm6216|ENSMUSG00000097628-ENSMUSG00000098163|intergenic_region|ENSMUSG00000097628-ENSMUSG00000098163|||n.12584715A>G||||||	GT:AD:AF:DP:F1R2:F2R1:SB	0/0:40,0:0.023:40:22,0:18,0:19,21,0,0	0/1:44,3:0.083:47:17,2:26,1:23,21,3,0	613_T1
chr1	12604610	.	C	T	.	PASS	AS_FilterStatus=SITE;AS_SB_TABLE=33,43|1,3;DP=84;ECNT=1;GERMQ=93;MBQ=35,35;MFRL=439,427;MMQ=60,60;MPOS=40;NALOD=1.57;NLOD=10.53;POPAF=6.00;TLOD=8.81;ANN=T|intergenic_region|MODIFIER|Gm2383-Gm6216|ENSMUSG00000097628-ENSMUSG00000098163|intergenic_region|ENSMUSG00000097628-ENSMUSG00000098163|||n.12604610C>T||||||	GT:AD:AF:DP:F1R2:F2R1:SB	0/0:36,0:0.026:36:14,0:21,0:22,14,0,0	0/1:40,4:0.109:44:18,2:20,2:11,29,1,3	613_T1
chr1	12635122	.	CA	C	.	PASS	AS_FilterStatus=SITE;AS_SB_TABLE=28,32|3,2;DP=74;ECNT=1;GERMQ=93;MBQ=34,33;MFRL=406,497;MMQ=60,60;MPOS=42;NALOD=1.46;NLOD=8.11;POPAF=6.00;RPA=7,6;RU=A;STR;STRQ=93;TLOD=8.26;ANN=C|intergenic_region|MODIFIER|Gm2383-Gm6216|ENSMUSG00000097628-ENSMUSG00000098163|intergenic_region|ENSMUSG00000097628-ENSMUSG00000098163|||n.12635123delA||||||	GT:AD:AF:DP:F1R2:F2R1:SB	0/0:27,0:0.034:27:12,0:14,0:11,16,0,0	0/1:33,5:0.148:38:12,2:20,3:17,16,3,2	613_T1
chr1	12681185	.	GTT	G	.	PASS	AS_FilterStatus=SITE;AS_SB_TABLE=33,26|4,0;DP=78;ECNT=1;GERMQ=93;MBQ=35,36;MFRL=468,409;MMQ=60,60;MPOS=38;NALOD=1.31;NLOD=10.50;POPAF=6.00;RPA=11,9;RU=T;STR;STRQ=93;TLOD=8.42;ANN=G|intergenic_region|MODIFIER|Gm17644-Sulf1|ENSMUSG00000097171-ENSMUSG00000016918|intergenic_region|ENSMUSG00000097171-ENSMUSG00000016918|||n.12681186_12681187delTT||||||	GT:AD:AF:DP:F1R2:F2R1:SB	0/0:35,0:0.025:35:14,0:16,0:18,17,0,0	0/1:24,4:0.163:28:9,1:7,3:15,9,4,0	613_T1
chr1	12708374	.	CTT	C	.	PASS	AS_FilterStatus=SITE;AS_SB_TABLE=21,26|0,3;DP=60;ECNT=1;GERMQ=93;MBQ=33,36;MFRL=460,416;MMQ=60,60;MPOS=45;NALOD=1.27;NLOD=9.59;POPAF=6.00;RPA=12,10;RU=T;STR;STRQ=93;TLOD=7.50;ANN=C|intragenic_variant|MODIFIER|Sulf1|ENSMUSG00000016918|gene_variant|ENSMUSG00000016918|||n.12708385_12708386delTT||||||	GT:AD:AF:DP:F1R2:F2R1:SB	0/0:32,0:0.027:32:14,0:14,0:14,18,0,0	0/1:15,3:0.196:18:6,0:7,3:7,8,0,3	613_T1
chr1	12721197	.	C	T	.	PASS	AS_FilterStatus=SITE;AS_SB_TABLE=17,35|4,5;DP=62;ECNT=1;GERMQ=91;MBQ=35,35;MFRL=456,429;MMQ=60,60;MPOS=26;NALOD=1.46;NLOD=8.43;POPAF=6.00;TLOD=26.44;ANN=T|intron_variant|MODIFIER|Sulf1|ENSMUSG00000016918|transcript|ENSMUST00000088585|protein_coding|1/21|c.-228+2414C>T||||||	GT:AD:AF:DP:F1R2:F2R1:SB	0/0:29,0:0.033:29:13,0:16,0:11,18,0,0	0/1:23,9:0.295:32:11,6:11,3:6,17,4,5	3147_T1
chr1	12762908	.	CTTTT	C	.	PASS	AS_FilterStatus=SITE;AS_SB_TABLE=17,11|2,2;DP=46;ECNT=1;GERMQ=57;MBQ=33,33;MFRL=444,481;MMQ=60,60;MPOS=60;NALOD=0.806;NLOD=5.66;POPAF=6.00;RPA=22,18;RU=T;STR;STRQ=93;TLOD=10.25;ANN=C|intron_variant|MODIFIER|Sulf1|ENSMUSG00000016918|transcript|ENSMUST00000088585|protein_coding|2/21|c.-132-23152_-132-23149delTTTT||||||INFO_REALIGN_3_PRIME	GT:AD:AF:DP:F1R2:F2R1:SB	0/0:19,0:0.042:19:8,0:8,0:13,6,0,0	0/1:9,4:0.329:13:4,2:3,1:4,5,2,2	613_T1
chr1	12879442	.	A	G	.	PASS	AS_FilterStatus=SITE;AS_SB_TABLE=23,28|1,3;DP=56;ECNT=1;GERMQ=93;MBQ=34,34;MFRL=460,457;MMQ=60,60;MPOS=42;NALOD=1.37;NLOD=6.62;POPAF=6.00;TLOD=9.34;ANN=G|intron_variant|MODIFIER|Slco5a1|ENSMUSG00000025938|transcript|ENSMUST00000115403|protein_coding|6/8|c.1786-63T>C||||||	GT:AD:AF:DP:F1R2:F2R1:SB	0/0:22,0:0.041:22:14,0:8,0:11,11,0,0	0/1:29,4:0.147:33:15,2:14,2:12,17,1,3	3147_T1
chr1	12891528	.	G	T	.	PASS	AS_FilterStatus=SITE;AS_SB_TABLE=23,27|5,3;DP=59;ECNT=1;GERMQ=92;MBQ=34,34;MFRL=399,400;MMQ=60,60;MPOS=35;NALOD=1.43;NLOD=7.52;POPAF=6.00;TLOD=22.30;ANN=T|intron_variant|MODIFIER|Slco5a1|ENSMUSG00000025938|transcript|ENSMUST00000115403|protein_coding|5/8|c.1625+2899C>A||||||	GT:AD:AF:DP:F1R2:F2R1:SB	0/0:25,0:0.036:25:12,0:13,0:13,12,0,0	0/1:25,8:0.267:33:11,4:12,4:10,15,5,3	2985_T1
chr1	12923637	.	C	CATAT	.	PASS	AS_FilterStatus=SITE;AS_SB_TABLE=16,24|1,2;DP=59;ECNT=1;GERMQ=74;MBQ=36,37;MFRL=416,402;MMQ=60,60;MPOS=52;NALOD=0.979;NLOD=6.67;POPAF=6.00;RPA=12,14;RU=AT;STR;STRQ=93;TLOD=7.73;ANN=CATAT|intron_variant|MODIFIER|Slco5a1|ENSMUSG00000025938|transcript|ENSMUST00000115403|protein_coding|3/8|c.1262-2439_1262-2436dupATAT||||||	GT:AD:AF:DP:F1R2:F2R1:SB	0/0:23,0:0.037:23:13,0:10,0:12,11,0,0	0/1:17,3:0.178:20:10,1:7,2:4,13,1,2	3147_T1
chr1	12954861	.	CA	C	.	PASS	AS_FilterStatus=SITE;AS_SB_TABLE=32,35|1,3;DP=75;ECNT=1;GERMQ=93;MBQ=35,37;MFRL=418,465;MMQ=60,60;MPOS=29;NALOD=1.62;NLOD=11.72;POPAF=6.00;RPA=7,6;RU=A;STR;STRQ=93;TLOD=6.45;ANN=C|intron_variant|MODIFIER|Slco5a1|ENSMUSG00000025938|transcript|ENSMUST00000115403|protein_coding|1/8|c.917-10750delT||||||	GT:AD:AF:DP:F1R2:F2R1:SB	0/0:40,0:0.024:40:18,0:18,0:17,23,0,0	0/1:27,4:0.150:31:15,0:11,4:15,12,1,3	613_T1
chr1	13007311	.	CA	C	.	PASS	AS_FilterStatus=SITE;AS_SB_TABLE=15,56|5,1;DP=78;ECNT=1;GERMQ=93;MBQ=36,33;MFRL=469,471;MMQ=60,60;MPOS=22;NALOD=1.58;NLOD=10.82;POPAF=6.00;RPA=6,5;RU=A;STR;STRQ=93;TLOD=10.84;ANN=C|intergenic_region|MODIFIER|Slco5a1-Gm5250|ENSMUSG00000025938-ENSMUSG00000069620|intergenic_region|ENSMUSG00000025938-ENSMUSG00000069620|||n.13007312delA||||||	GT:AD:AF:DP:F1R2:F2R1:SB	0/0:36,0:0.026:36:20,0:15,0:10,26,0,0	0/1:35,6:0.162:41:15,3:19,3:5,30,5,1	613_T1
chr1	13065208	.	C	T	.	PASS	AS_FilterStatus=SITE;AS_SB_TABLE=34,43|3,1;DP=83;ECNT=1;GERMQ=93;MBQ=28,35;MFRL=428,519;MMQ=60,60;MPOS=49;NALOD=1.51;NLOD=9.33;POPAF=6.00;TLOD=8.88;ANN=T|downstream_gene_variant|MODIFIER|Gm5250|ENSMUSG00000069620|transcript|ENSMUST00000059065|protein_coding||c.*2860C>T|||||2860|WARNING_TRANSCRIPT_NO_START_CODON,T|intergenic_region|MODIFIER|Gm5250-Prdm14|ENSMUSG00000069620-ENSMUSG00000042414|inter…	GT:AD:AF:DP:F1R2:F2R1:SB	0/0:31,0:0.030:31:23,0:8,0:13,18,0,0	0/1:46,4:0.098:50:25,1:19,3:21,25,3,1	613_T1
chr1	13092247	.	GCTCT	G	.	PASS	AS_FilterStatus=SITE;AS_SB_TABLE=11,5|2,5;DP=39;ECNT=1;GERMQ=29;MBQ=35,34;MFRL=389,406;MMQ=60,60;MPOS=28;NALOD=0.851;NLOD=3.80;POPAF=6.00;RPA=22,20;RU=CT;STR;STRQ=93;TLOD=18.96;ANN=G|intergenic_region|MODIFIER|Gm5250-Prdm14|ENSMUSG00000069620-ENSMUSG00000042414|intergenic_region|ENSMUSG00000069620-ENSMUSG00000042414|||n.13092248_13092251delCTCT||||||	GT:AD:AF:DP:F1R2:F2R1:SB	0/0:13,0:0.053:13:5,0:8,0:9,4,0,0	0/1:3,7:0.667:10:2,3:0,3:2,1,2,5	3147_T1
chr1	13093920	.	CTT	C	.	PASS	AS_FilterStatus=SITE;AS_SB_TABLE=19,12|3,3;DP=44;ECNT=1;GERMQ=58;MBQ=33,33;MFRL=420,462;MMQ=60,60;MPOS=43;NALOD=1.07;NLOD=6.00;POPAF=6.00;RPA=17,15;RU=T;STR;STRQ=93;TLOD=8.09;ANN=C|intergenic_region|MODIFIER|Gm5250-Prdm14|ENSMUSG00000069620-ENSMUSG00000042414|intergenic_region|ENSMUSG00000069620-ENSMUSG00000042414|||n.13093921_13093922delTT||||||	GT:AD:AF:DP:F1R2:F2R1:SB	0/0:21,0:0.043:21:6,0:12,0:10,11,0,0	0/1:10,6:0.363:16:6,1:2,5:9,1,3,3	613_T1
chr1	13094538	.	CTT	C	.	PASS	AS_FilterStatus=SITE;AS_SB_TABLE=17,10|7,5;DP=59;ECNT=1;GERMQ=54;MBQ=33,33;MFRL=430,457;MMQ=60,60;MPOS=42;NALOD=0.910;NLOD=6.07;POPAF=6.00;RPA=23,21;RU=T;STR;STRQ=93;TLOD=19.52;ANN=C|intergenic_region|MODIFIER|Gm5250-Prdm14|ENSMUSG00000069620-ENSMUSG00000042414|intergenic_region|ENSMUSG00000069620-ENSMUSG00000042414|||n.13094539_13094540delTT||||||	GT:AD:AF:DP:F1R2:F2R1:SB	0/0:21,0:0.037:21:9,0:9,0:14,7,0,0	0/1:6,12:0.652:18:4,3:1,6:3,3,7,5	613_T1
chr1	13126249	.	CTT	C	.	PASS	AS_FilterStatus=SITE;AS_SB_TABLE=16,15|3,0;DP=47;ECNT=1;GERMQ=64;MBQ=32,32;MFRL=435,506;MMQ=60,60;MPOS=34;NALOD=1.18;NLOD=3.24;POPAF=6.00;RPA=17,15;RU=T;STR;STRQ=93;TLOD=5.76;ANN=C|intron_variant|MODIFIER|Prdm14|ENSMUSG00000042414|transcript|ENSMUST00000047577|protein_coding|1/7|c.-21-395_-21-394delAA||||||	GT:AD:AF:DP:F1R2:F2R1:SB	0/0:11,0:0.066:11:2,0:4,0:4,7,0,0	0/1:20,3:0.164:23:6,0:8,2:12,8,3,0	613_T1
chr1	13143624	.	CTT	C	.	PASS	AS_FilterStatus=SITE;AS_SB_TABLE=23,32|3,1;DP=68;ECNT=1;GERMQ=93;MBQ=34,31;MFRL=460,407;MMQ=60,60;MPOS=27;NALOD=1.46;NLOD=7.50;POPAF=6.00;RPA=12,10;RU=T;STR;STRQ=93;TLOD=9.83;ANN=C|intron_variant|MODIFIER|Ncoa2|ENSMUSG00000005886|transcript|ENSMUST00000006037|protein_coding|22/22|c.4378-854_4378-853delAA||||||	GT:AD:AF:DP:F1R2:F2R1:SB	0/0:25,0:0.034:25:8,0:17,0:9,16,0,0	0/1:30,4:0.137:34:14,0:13,3:14,16,3,1	613_T1
chr1	13184305	.	A	G	.	PASS	AS_FilterStatus=SITE;AS_SB_TABLE=34,22|3,2;DP=63;ECNT=1;GERMQ=93;MBQ=35,35;MFRL=455,415;MMQ=60,60;MPOS=45;NALOD=1.49;NLOD=9.03;POPAF=6.00;TLOD=13.05;ANN=G|synonymous_variant|LOW|Ncoa2|ENSMUSG00000005886|transcript|ENSMUST00000006037|protein_coding|7/23|c.600T>C|p.Cys200Cys|822/4897|600/4389|200/1462||	GT:AD:AF:DP:F1R2:F2R1:SB	0/0:30,0:0.031:30:9,0:21,0:19,11,0,0	0/1:26,5:0.182:31:16,4:9,1:15,11,3,2	3147_T1
chr1	13204936	.	T	C	.	PASS	AS_FilterStatus=SITE;AS_SB_TABLE=31,43|2,1;DP=79;ECNT=1;GERMQ=93;MBQ=36,33;MFRL=449,442;MMQ=60,60;MPOS=30;NALOD=1.56;NLOD=10.53;POPAF=6.00;TLOD=6.29;ANN=C|intron_variant|MODIFIER|Ncoa2|ENSMUSG00000005886|transcript|ENSMUST00000006037|protein_coding|4/22|c.260-14746A>G||||||	GT:AD:AF:DP:F1R2:F2R1:SB	0/0:36,0:0.027:36:26,0:10,0:15,21,0,0	0/1:38,3:0.093:41:23,2:15,1:16,22,2,1	613_T1
chr1	13217098	.	CAAA	C	.	PASS	AS_FilterStatus=SITE;AS_SB_TABLE=8,8|4,3;DP=36;ECNT=1;GERMQ=17;MBQ=31,32;MFRL=456,541;MMQ=60,60;MPOS=33;NALOD=0.755;NLOD=3.12;POPAF=6.00;RPA=27,24;RU=A;STR;STRQ=93;TLOD=11.05;ANN=C|intron_variant|MODIFIER|Ncoa2|ENSMUSG00000005886|transcript|ENSMUST00000006037|protein_coding|4/22|c.259+4206_259+4208delTTT||||||	GT:AD:AF:DP:F1R2:F2R1:SB	0/0:11,0:0.065:11:5,0:4,0:5,6,0,0	0/1:5,7:0.576:12:2,2:0,3:3,2,4,3	2985_T1
chr1	13255231	.	T	A	.	PASS	AS_FilterStatus=SITE;AS_SB_TABLE=21,12|3,0;DP=38;ECNT=1;GERMQ=69;MBQ=35,29;MFRL=414,533;MMQ=60,60;MPOS=24;NALOD=1.33;NLOD=5.92;POPAF=6.00;TLOD=5.91;ANN=A|intron_variant|MODIFIER|Ncoa2|ENSMUSG00000005886|transcript|ENSMUST00000006037|protein_coding|2/22|c.-19-30518A>T||||||	GT:AD:AF:DP:F1R2:F2R1:SB	0/0:21,0:0.045:21:6,0:12,0:14,7,0,0	0/1:12,3:0.235:15:4,0:7,3:7,5,3,0	2985_T1
chr1	13354463	.	CTTT	C	.	PASS	AS_FilterStatus=SITE;AS_SB_TABLE=7,11|1,2;DP=33;ECNT=1;GERMQ=28;MBQ=33,36;MFRL=443,610;MMQ=60,60;MPOS=63;NALOD=1.18;NLOD=3.24;POPAF=6.00;RPA=18,15;RU=T;STR;STRQ=93;TLOD=6.16;ANN=C|intron_variant|MODIFIER|Ncoa2|ENSMUSG00000005886|transcript|ENSMUST00000006037|protein_coding|1/22|c.-77+19472_-77+19474delAAA||||||	GT:AD:AF:DP:F1R2:F2R1:SB	0/0:11,0:0.066:11:4,0:6,0:3,8,0,0	0/1:7,3:0.318:10:3,1:3,2:4,3,1,2	613_T1
chr1	13409259	.	GTT	G	.	PASS	AS_FilterStatus=SITE;AS_SB_TABLE=13,8|3,4;DP=37;ECNT=1;GERMQ=33;MBQ=36,32;MFRL=431,407;MMQ=60,60;MPOS=38;NALOD=1.22;NLOD=3.85;POPAF=6.00;RPA=26,24;RU=T;STR;STRQ=93;TLOD=9.04;ANN=G|intergenic_region|MODIFIER|Ncoa2-Tram1|ENSMUSG00000005886-ENSMUSG00000025935|intergenic_region|ENSMUSG00000005886-ENSMUSG00000025935|||n.13409260_13409261delTT||||||	GT:AD:AF:DP:F1R2:F2R1:SB	0/0:13,0:0.059:13:7,0:2,0:8,5,0,0	0/1:8,7:0.434:15:4,2:2,3:5,3,3,4	613_T1
chr1	13441005	.	AT	A	.	PASS	AS_FilterStatus=SITE;AS_SB_TABLE=35,44|4,3;DP=91;ECNT=1;GERMQ=93;MBQ=34,35;MFRL=447,426;MMQ=60,60;MPOS=47;NALOD=1.66;NLOD=12.93;POPAF=6.00;RPA=7,6;RU=T;STR;STRQ=93;TLOD=12.75;ANN=A|intergenic_region|MODIFIER|Ncoa2-Tram1|ENSMUSG00000005886-ENSMUSG00000025935|intergenic_region|ENSMUSG00000005886-ENSMUSG00000025935|||n.13441006delT||||||	GT:AD:AF:DP:F1R2:F2R1:SB	0/0:43,0:0.022:43:23,0:18,0:18,25,0,0	0/1:36,7:0.181:43:13,6:23,1:17,19,4,3	613_T1
chr1	13449123	.	TA	T	.	PASS	AS_FilterStatus=SITE;AS_SB_TABLE=14,30|3,1;DP=49;ECNT=1;GERMQ=93;MBQ=34,35;MFRL=454,428;MMQ=60,60;MPOS=67;NALOD=1.35;NLOD=6.31;POPAF=6.00;RPA=6,5;RU=A;STR;STRQ=93;TLOD=7.03;ANN=T|intergenic_region|MODIFIER|Ncoa2-Tram1|ENSMUSG00000005886-ENSMUSG00000025935|intergenic_region|ENSMUSG00000005886-ENSMUSG00000025935|||n.13449124delA||||||	GT:AD:AF:DP:F1R2:F2R1:SB	0/0:21,0:0.043:21:12,0:9,0:8,13,0,0	0/1:23,4:0.171:27:14,3:8,1:6,17,3,1	613_T1
chr1	13569595	.	G	T	.	PASS	AS_FilterStatus=SITE;AS_SB_TABLE=32,39|0,4;DP=78;ECNT=1;GERMQ=93;MBQ=33,30;MFRL=412,567;MMQ=60,60;MPOS=27;NALOD=1.56;NLOD=10.44;POPAF=6.00;TLOD=6.44;ANN=T|synonymous_variant|LOW|Tram1|ENSMUSG00000025935|transcript|ENSMUST00000027068|protein_coding|10/11|c.927C>A|p.Ala309Ala|1069/2888|927/1125|309/374||	GT:AD:AF:DP:F1R2:F2R1:SB	0/0:35,0:0.027:35:15,0:18,0:12,23,0,0	0/1:36,4:0.107:40:17,2:18,1:20,16,0,4	2985_T1
chr1	13587829	.	CAA	C	.	PASS	AS_FilterStatus=SITE;AS_SB_TABLE=10,16|4,4;DP=49;ECNT=1;GERMQ=37;MBQ=33,33;MFRL=428,413;MMQ=60,60;MPOS=37;NALOD=0.719;NLOD=4.20;POPAF=6.00;RPA=19,17;RU=A;STR;STRQ=93;TLOD=9.96;ANN=C|intron_variant|MODIFIER|Tram1|ENSMUSG00000025935|transcript|ENSMUST00000027068|protein_coding|1/10|c.123+1769_123+1770delTT||||||	GT:AD:AF:DP:F1R2:F2R1:SB	0/0:14,0:0.055:14:8,0:3,0:7,7,0,0	0/1:12,8:0.407:20:3,2:5,5:3,9,4,4	2985_T1
chr1	13613347	.	C	A	.	PASS	AS_FilterStatus=SITE;AS_SB_TABLE=34,36|2,2;DP=75;ECNT=1;GERMQ=93;MBQ=34,34;MFRL=416,467;MMQ=60,60;MPOS=39;NALOD=1.58;NLOD=11.04;POPAF=6.00;TLOD=9.40;ANN=A|intergenic_region|MODIFIER|Tram1-Lactb2|ENSMUSG00000025935-ENSMUSG00000025937|intergenic_region|ENSMUSG00000025935-ENSMUSG00000025937|||n.13613347C>A||||||	GT:AD:AF:DP:F1R2:F2R1:SB	0/0:40,0:0.026:40:20,0:18,0:21,19,0,0	0/1:30,4:0.139:34:14,1:15,3:13,17,2,2	3147_T1
chr1	13664779	.	GA	G	.	PASS	AS_FilterStatus=SITE;AS_SB_TABLE=35,18|3,1;DP=58;ECNT=2;GERMQ=93;MBQ=33,27;MFRL=435,486;MMQ=60,60;MPOS=44;NALOD=1.16;NLOD=7.57;POPAF=6.00;RPA=7,6;RU=A;STR;STRQ=93;TLOD=6.65;ANN=G|upstream_gene_variant|MODIFIER|Lactb2|ENSMUSG00000025937|transcript|ENSMUST00000027071|protein_coding||c.-4330delT|||||4234|,G|upstream_gene_variant|MODIFIER|Xkr9|ENSMUSG00000067813|transcript|ENSMUST00000088542|protein_…	GT:AD:AF:DP:F1R2:F2R1:SB	0/0:25,0:0.034:25:12,0:8,0:20,5,0,0	0/1:28,4:0.144:32:12,1:12,3:15,13,3,1	613_T1
chr1	13684061	.	G	A	.	PASS	AS_FilterStatus=SITE;AS_SB_TABLE=30,36|5,1;DP=73;ECNT=1;GERMQ=93;MBQ=34,33;MFRL=467,435;MMQ=60,60;MPOS=48;NALOD=1.60;NLOD=11.74;POPAF=6.00;TLOD=15.36;ANN=A|stop_gained|HIGH|Xkr9|ENSMUSG00000067813|transcript|ENSMUST00000088542|protein_coding|3/4|c.278G>A|p.Trp93*|742/1926|278/1122|93/373||;LOF=(Xkr9|ENSMUSG00000067813|1|1.00);NMD=(Xkr9|ENSMUSG00000067813|1|1.00)	GT:AD:AF:DP:F1R2:F2R1:SB	0/0:39,0:0.024:39:23,0:16,0:19,20,0,0	0/1:27,6:0.200:33:13,3:14,3:11,16,5,1	2985_T1
chr1	13721011	.	CA	C	.	PASS	AS_FilterStatus=SITE;AS_SB_TABLE=29,32|6,2;DP=77;ECNT=1;GERMQ=93;MBQ=34,32;MFRL=442,440;MMQ=60,46;MPOS=34;NALOD=1.61;NLOD=10.81;POPAF=6.00;RPA=7,6;RU=A;STR;STRQ=93;TLOD=16.23;ANN=C|intergenic_region|MODIFIER|Xkr9-Gm26273|ENSMUSG00000067813-ENSMUSG00000077368|intergenic_region|ENSMUSG00000067813-ENSMUSG00000077368|||n.13721012delA||||||	GT:AD:AF:DP:F1R2:F2R1:SB	0/0:36,0:0.024:36:16,0:19,0:16,20,0,0	0/1:25,8:0.256:33:11,3:13,5:13,12,6,2	613_T1
chr1	13764791	.	C	A	.	PASS	AS_FilterStatus=SITE;AS_SB_TABLE=29,33|6,3;DP=73;ECNT=1;GERMQ=93;MBQ=35,35;MFRL=439,418;MMQ=60,52;MPOS=52;NALOD=1.53;NLOD=9.93;POPAF=6.00;TLOD=23.44;ANN=A|intergenic_region|MODIFIER|Xkr9-Gm26273|ENSMUSG00000067813-ENSMUSG00000077368|intergenic_region|ENSMUSG00000067813-ENSMUSG00000077368|||n.13764791C>A||||||	GT:AD:AF:DP:F1R2:F2R1:SB	0/0:33,0:0.029:33:14,0:19,0:12,21,0,0	0/1:29,9:0.230:38:16,6:13,3:17,12,6,3	2985_T1
chr1	13791027	.	C	A	.	PASS	AS_FilterStatus=SITE;AS_SB_TABLE=33,28|4,2;DP=69;ECNT=1;GERMQ=93;MBQ=34,34;MFRL=451,384;MMQ=60,60;MPOS=42;NALOD=1.54;NLOD=9.93;POPAF=6.00;TLOD=11.57;ANN=A|upstream_gene_variant|MODIFIER|Gm5523|ENSMUSG00000097711|transcript|ENSMUST00000180415|processed_pseudogene||n.-4148G>T|||||4148|,A|intergenic_region|MODIFIER|Gm5523-Gm25491|ENSMUSG00000097711-ENSMUSG00000089358|intergenic_region|ENSMUSG0000009…	GT:AD:AF:DP:F1R2:F2R1:SB	0/0:33,0:0.028:33:19,0:14,0:14,19,0,0	0/1:28,6:0.185:34:13,1:14,4:19,9,4,2	2985_T1
chr1	13791259	.	TG	T	.	PASS	AS_FilterStatus=SITE;AS_SB_TABLE=11,16|8,11;DP=52;ECNT=1;GERMQ=52;MBQ=34,35;MFRL=410,408;MMQ=60,60;MPOS=35;NALOD=1.32;NLOD=5.40;POPAF=6.00;RPA=11,10;RU=G;STR;STRQ=59;TLOD=41.76;ANN=T|upstream_gene_variant|MODIFIER|Gm5523|ENSMUSG00000097711|transcript|ENSMUST00000180415|processed_pseudogene||n.-4381delC|||||4381|,T|intergenic_region|MODIFIER|Gm5523-Gm25491|ENSMUSG00000097711-ENSMUSG00000089358|int…	GT:AD:AF:DP:F1R2:F2R1:SB	0/0:18,0:0.047:18:7,0:11,0:8,10,0,0	0/1:9,19:0.665:28:5,9:4,9:3,6,8,11	3147_T1
chr1	13821509	.	GT	G	.	PASS	AS_FilterStatus=SITE;AS_SB_TABLE=24,22|8,6;DP=67;ECNT=1;GERMQ=93;MBQ=35,35;MFRL=443,427;MMQ=60,60;MPOS=42;NALOD=1.59;NLOD=10.79;POPAF=6.00;RPA=14,13;RU=T;STR;STRQ=23;TLOD=27.88;ANN=G|intergenic_region|MODIFIER|Gm5523-Gm25491|ENSMUSG00000097711-ENSMUSG00000089358|intergenic_region|ENSMUSG00000097711-ENSMUSG00000089358|||n.13821510delT||||||	GT:AD:AF:DP:F1R2:F2R1:SB	0/0:37,0:0.025:37:16,0:16,0:18,19,0,0	0/1:9,14:0.599:23:5,4:1,7:6,3,8,6	2985_T1
chr1	13867542	.	C	T	.	PASS	AS_FilterStatus=SITE;AS_SB_TABLE=44,35|3,1;DP=86;ECNT=1;GERMQ=93;MBQ=32,37;MFRL=474,506;MMQ=60,60;MPOS=44;NALOD=1.66;NLOD=13.19;POPAF=6.00;TLOD=9.94;ANN=T|intergenic_region|MODIFIER|Gm5523-Gm25491|ENSMUSG00000097711-ENSMUSG00000089358|intergenic_region|ENSMUSG00000097711-ENSMUSG00000089358|||n.13867542C>T||||||	GT:AD:AF:DP:F1R2:F2R1:SB	0/0:44,0:0.022:44:27,0:15,0:24,20,0,0	0/1:35,4:0.125:39:15,2:17,2:20,15,3,1	613_T1
chr1	13871542	.	TCC	T	.	PASS	AS_FilterStatus=SITE;AS_SB_TABLE=13,25|3,1;DP=51;ECNT=1;GERMQ=84;MBQ=35,35;MFRL=455,565;MMQ=60,60;MPOS=51;NALOD=1.42;NLOD=6.89;POPAF=6.00;RPA=12,10;RU=C;STR;STRQ=93;TLOD=10.44;ANN=T|intergenic_region|MODIFIER|Gm5523-Gm25491|ENSMUSG00000097711-ENSMUSG00000089358|intergenic_region|ENSMUSG00000097711-ENSMUSG00000089358|||n.13871543_13871544delCC||||||	GT:AD:AF:DP:F1R2:F2R1:SB	0/0:23,0:0.037:23:7,0:12,0:9,14,0,0	0/1:15,4:0.235:19:7,2:8,2:4,11,3,1	613_T1
chr1	13897329	.	A	C	.	PASS	AS_FilterStatus=SITE;AS_SB_TABLE=21,21|0,5;DP=48;ECNT=1;GERMQ=83;MBQ=34,28;MFRL=453,469;MMQ=50,57;MPOS=12;NALOD=1.34;NLOD=6.32;POPAF=6.00;TLOD=13.34;ANN=C|intergenic_region|MODIFIER|Gm5523-Gm25491|ENSMUSG00000097711-ENSMUSG00000089358|intergenic_region|ENSMUSG00000097711-ENSMUSG00000089358|||n.13897329A>C||||||	GT:AD:AF:DP:F1R2:F2R1:SB	0/0:21,0:0.043:21:11,0:8,0:9,12,0,0	0/1:21,5:0.221:26:10,0:10,3:12,9,0,5	2985_T1
chr1	13935388	.	TAA	T	.	PASS	AS_FilterStatus=SITE;AS_SB_TABLE=14,13|5,1;DP=46;ECNT=1;GERMQ=47;MBQ=34,35;MFRL=426,404;MMQ=60,60;MPOS=35;NALOD=1.06;NLOD=4.54;POPAF=6.00;RPA=17,15;RU=A;STR;STRQ=93;TLOD=10.32;ANN=T|downstream_gene_variant|MODIFIER|Gm25491|ENSMUSG00000089358|transcript|ENSMUST00000158733|misc_RNA||n.*2704_*2705delAA|||||2704|,T|intergenic_region|MODIFIER|Gm25491-Eya1|ENSMUSG00000089358-ENSMUSG00000025932|intergen…	GT:AD:AF:DP:F1R2:F2R1:SB	0/0:15,0:0.049:15:6,0:5,0:7,8,0,0	0/1:12,6:0.367:18:4,4:4,2:7,5,5,1	613_T1
chr1	13944644	.	C	T	.	PASS	AS_FilterStatus=SITE;AS_SB_TABLE=30,31|1,3;DP=70;ECNT=1;GERMQ=93;MBQ=34,36;MFRL=451,548;MMQ=60,60;MPOS=43;NALOD=1.25;NLOD=9.93;POPAF=6.00;TLOD=5.37;ANN=T|intergenic_region|MODIFIER|Gm25491-Eya1|ENSMUSG00000089358-ENSMUSG00000025932|intergenic_region|ENSMUSG00000089358-ENSMUSG00000025932|||n.13944644C>T||||||	GT:AD:AF:DP:F1R2:F2R1:SB	0/0:33,0:0.028:33:14,0:19,0:16,17,0,0	0/1:28,4:0.146:32:14,2:12,2:14,14,1,3	613_T1
chr1	13945698	.	T	C	.	PASS	AS_FilterStatus=SITE;AS_SB_TABLE=26,17|2,1;DP=48;ECNT=2;GERMQ=93;MBQ=34,32;MFRL=452,520;MMQ=60,60;MPOS=43;NALOD=1.08;NLOD=6.33;POPAF=6.00;TLOD=6.08;ANN=C|intergenic_region|MODIFIER|Gm25491-Eya1|ENSMUSG00000089358-ENSMUSG00000025932|intergenic_region|ENSMUSG00000089358-ENSMUSG00000025932|||n.13945698T>C||||||	GT:AD:AF:DP:F1R2:F2R1:SB	0/0:21,0:0.042:21:14,0:7,0:14,7,0,0	0/1:22,3:0.146:25:8,2:14,1:12,10,2,1	613_T1
chr1	14106154	.	G	T	.	PASS	AS_FilterStatus=SITE;AS_SB_TABLE=20,32|5,3;DP=63;ECNT=1;GERMQ=93;MBQ=33,34;MFRL=443,441;MMQ=60,60;MPOS=48;NALOD=1.51;NLOD=9.28;POPAF=6.00;TLOD=22.27;ANN=T|intergenic_region|MODIFIER|Gm25491-Eya1|ENSMUSG00000089358-ENSMUSG00000025932|intergenic_region|ENSMUSG00000089358-ENSMUSG00000025932|||n.14106154G>T||||||	GT:AD:AF:DP:F1R2:F2R1:SB	0/0:31,0:0.030:31:14,0:14,0:13,18,0,0	0/1:21,8:0.300:29:12,7:9,1:7,14,5,3	2985_T1
chr1	14107015	.	CA	C	.	PASS	AS_FilterStatus=SITE;AS_SB_TABLE=25,27|2,2;DP=61;ECNT=1;GERMQ=93;MBQ=34,35;MFRL=450,432;MMQ=60,60;MPOS=44;NALOD=1.47;NLOD=8.11;POPAF=6.00;RPA=6,5;RU=A;STR;STRQ=93;TLOD=6.97;ANN=C|intergenic_region|MODIFIER|Gm25491-Eya1|ENSMUSG00000089358-ENSMUSG00000025932|intergenic_region|ENSMUSG00000089358-ENSMUSG00000025932|||n.14107016delA||||||	GT:AD:AF:DP:F1R2:F2R1:SB	0/0:27,0:0.033:27:11,0:15,0:11,16,0,0	0/1:25,4:0.166:29:12,3:10,1:14,11,2,2	2985_T1
chr1	14120063	.	TAA	T	.	PASS	AS_FilterStatus=SITE;AS_SB_TABLE=14,11|4,1;DP=34;ECNT=1;GERMQ=50;MBQ=34,35;MFRL=431,418;MMQ=60,60;MPOS=46;NALOD=1.04;NLOD=5.42;POPAF=6.00;RPA=17,15;RU=A;STR;STRQ=93;TLOD=6.81;ANN=T|intergenic_region|MODIFIER|Gm25491-Eya1|ENSMUSG00000089358-ENSMUSG00000025932|intergenic_region|ENSMUSG00000089358-ENSMUSG00000025932|||n.14120064_14120065delAA||||||	GT:AD:AF:DP:F1R2:F2R1:SB	0/0:18,0:0.047:18:5,0:10,0:10,8,0,0	0/1:7,5:0.424:12:2,4:4,1:4,3,4,1	2985_T1
chr1	14179918	.	T	C	.	PASS	AS_FilterStatus=SITE;AS_SB_TABLE=22,16|2,2;DP=42;ECNT=1;GERMQ=76;MBQ=35,31;MFRL=426,434;MMQ=60,60;MPOS=48;NALOD=1.32;NLOD=5.93;POPAF=6.00;TLOD=9.08;ANN=C|upstream_gene_variant|MODIFIER|Gm22616|ENSMUSG00000095853|transcript|ENSMUST00000179783|miRNA||n.-2660T>C|||||2660|,C|intron_variant|MODIFIER|Eya1|ENSMUSG00000025932|transcript|ENSMUST00000027066|protein_coding|16/17|c.1595-338A>G||||||	GT:AD:AF:DP:F1R2:F2R1:SB	0/0:20,0:0.046:20:11,0:7,0:11,9,0,0	0/1:18,4:0.208:22:6,0:12,4:11,7,2,2	3147_T1
chr1	14210847	.	CAAA	C	.	PASS	AS_FilterStatus=SITE;AS_SB_TABLE=18,8|4,0;DP=35;ECNT=1;GERMQ=46;MBQ=33,32;MFRL=433,394;MMQ=60,60;MPOS=29;NALOD=0.855;NLOD=4.97;POPAF=6.00;RPA=18,15;RU=A;STR;STRQ=93;TLOD=10.63;ANN=C|intron_variant|MODIFIER|Eya1|ENSMUSG00000025932|transcript|ENSMUST00000027066|protein_coding|11/17|c.1048-1866_1048-1864delTTT||||||	GT:AD:AF:DP:F1R2:F2R1:SB	0/0:17,0:0.050:17:9,0:4,0:12,5,0,0	0/1:9,4:0.335:13:5,2:2,2:6,3,4,0	613_T1
chr1	14240567	.	TA	T	.	PASS	AS_FilterStatus=SITE;AS_SB_TABLE=40,25|4,6;DP=76;ECNT=1;GERMQ=93;MBQ=34,34;MFRL=417,430;MMQ=60,60;MPOS=21;NALOD=1.52;NLOD=9.32;POPAF=6.00;RPA=6,5;RU=A;STR;STRQ=93;TLOD=20.82;ANN=T|intron_variant|MODIFIER|Eya1|ENSMUSG00000025932|transcript|ENSMUST00000027066|protein_coding|9/17|c.824-9016delT||||||	GT:AD:AF:DP:F1R2:F2R1:SB	0/0:31,0:0.030:31:11,0:19,0:17,14,0,0	0/1:34,10:0.239:44:11,2:22,8:23,11,4,6	613_T1
chr1	14241635	.	TA	T	.	PASS	AS_FilterStatus=SITE;AS_SB_TABLE=25,29|3,4;DP=64;ECNT=1;GERMQ=93;MBQ=34,33;MFRL=434,384;MMQ=60,60;MPOS=27;NALOD=1.54;NLOD=9.92;POPAF=6.00;RPA=6,5;RU=A;STR;STRQ=93;TLOD=11.65;ANN=T|intron_variant|MODIFIER|Eya1|ENSMUSG00000025932|transcript|ENSMUST00000027066|protein_coding|9/17|c.824-10084delT||||||	GT:AD:AF:DP:F1R2:F2R1:SB	0/0:34,0:0.028:34:15,0:18,0:16,18,0,0	0/1:20,7:0.249:27:13,4:7,3:9,11,3,4	3147_T1
chr1	14323304	.	G	A	.	PASS	AS_FilterStatus=SITE;AS_SB_TABLE=41,29|5,0;DP=79;ECNT=1;GERMQ=93;MBQ=35,34;MFRL=464,474;MMQ=60,60;MPOS=30;NALOD=1.50;NLOD=8.93;POPAF=6.00;TLOD=11.67;ANN=A|intergenic_region|MODIFIER|Eya1-Msc|ENSMUSG00000025932-ENSMUSG00000025930|intergenic_region|ENSMUSG00000025932-ENSMUSG00000025930|||n.14323304G>A||||||	GT:AD:AF:DP:F1R2:F2R1:SB	0/0:30,0:0.031:30:16,0:12,0:18,12,0,0	0/1:40,5:0.134:45:17,2:19,3:23,17,5,0	613_T1
chr1	14341688	.	G	A	.	PASS	AS_FilterStatus=SITE;AS_SB_TABLE=37,28|3,5;DP=75;ECNT=1;GERMQ=93;MBQ=28,35;MFRL=444,467;MMQ=60,60;MPOS=51;NALOD=1.56;NLOD=10.43;POPAF=6.00;TLOD=22.58;ANN=A|intergenic_region|MODIFIER|Eya1-Msc|ENSMUSG00000025932-ENSMUSG00000025930|intergenic_region|ENSMUSG00000025932-ENSMUSG00000025930|||n.14341688G>A||||||	GT:AD:AF:DP:F1R2:F2R1:SB	0/0:35,0:0.027:35:17,0:15,0:20,15,0,0	0/1:30,8:0.238:38:15,6:11,2:17,13,3,5	613_T1
chr1	14352751	.	CT	C	.	PASS	AS_FilterStatus=SITE;AS_SB_TABLE=24,26|4,5;DP=63;ECNT=1;GERMQ=93;MBQ=35,36;MFRL=420,453;MMQ=60,60;MPOS=63;NALOD=1.52;NLOD=9.32;POPAF=6.00;RPA=7,6;RU=T;STR;STRQ=93;TLOD=19.76;ANN=C|intergenic_region|MODIFIER|Eya1-Msc|ENSMUSG00000025932-ENSMUSG00000025930|intergenic_region|ENSMUSG00000025932-ENSMUSG00000025930|||n.14352752delT||||||	GT:AD:AF:DP:F1R2:F2R1:SB	0/0:31,0:0.029:31:15,0:16,0:12,19,0,0	0/1:19,9:0.333:28:10,4:8,5:12,7,4,5	3147_T1
chr1	14372144	.	G	T	.	PASS	AS_FilterStatus=SITE;AS_SB_TABLE=13,18|2,2;DP=35;ECNT=1;GERMQ=61;MBQ=34,35;MFRL=450,421;MMQ=60,60;MPOS=36;NALOD=1.26;NLOD=5.12;POPAF=6.00;TLOD=11.47;ANN=T|intergenic_region|MODIFIER|Eya1-Msc|ENSMUSG00000025932-ENSMUSG00000025930|intergenic_region|ENSMUSG00000025932-ENSMUSG00000025930|||n.14372144G>T||||||	GT:AD:AF:DP:F1R2:F2R1:SB	0/0:17,0:0.053:17:7,0:10,0:4,13,0,0	0/1:14,4:0.250:18:7,2:7,2:9,5,2,2	2985_T1
chr1	14388872	.	CA	C	.	PASS	AS_FilterStatus=SITE;AS_SB_TABLE=14,18|7,6;DP=54;ECNT=1;GERMQ=52;MBQ=33,32;MFRL=457,397;MMQ=60,60;MPOS=50;NALOD=0.947;NLOD=5.93;POPAF=6.00;RPA=16,15;RU=A;STR;STRQ=5;TLOD=18.54;ANN=C|intergenic_region|MODIFIER|Eya1-Msc|ENSMUSG00000025932-ENSMUSG00000025930|intergenic_region|ENSMUSG00000025932-ENSMUSG00000025930|||n.14388873delA||||||	GT:AD:AF:DP:F1R2:F2R1:SB	0/0:20,0:0.040:20:10,0:9,0:8,12,0,0	0/1:12,13:0.515:25:3,6:6,4:6,6,7,6	613_T1
chr1	14400685	.	CTT	C	.	PASS	AS_FilterStatus=SITE;AS_SB_TABLE=25,16|3,0;DP=59;ECNT=1;GERMQ=92;MBQ=33,32;MFRL=430,412;MMQ=60,60;MPOS=54;NALOD=1.34;NLOD=5.42;POPAF=6.00;RPA=15,13;RU=T;STR;STRQ=93;TLOD=5.91;ANN=C|intergenic_region|MODIFIER|Eya1-Msc|ENSMUSG00000025932-ENSMUSG00000025930|intergenic_region|ENSMUSG00000025932-ENSMUSG00000025930|||n.14400686_14400687delTT||||||	GT:AD:AF:DP:F1R2:F2R1:SB	0/0:18,0:0.045:18:3,0:13,0:10,8,0,0	0/1:23,3:0.138:26:8,1:10,2:15,8,3,0	613_T1
chr1	14407317	.	ATT	A	.	PASS	AS_FilterStatus=SITE;AS_SB_TABLE=28,18|4,6;DP=60;ECNT=1;GERMQ=82;MBQ=34,35;MFRL=456,432;MMQ=60,60;MPOS=34;NALOD=1.48;NLOD=8.42;POPAF=6.00;RPA=10,8;RU=T;STR;STRQ=93;TLOD=31.66;ANN=A|intergenic_region|MODIFIER|Eya1-Msc|ENSMUSG00000025932-ENSMUSG00000025930|intergenic_region|ENSMUSG00000025932-ENSMUSG00000025930|||n.14407318_14407319delTT||||||	GT:AD:AF:DP:F1R2:F2R1:SB	0/0:29,0:0.032:29:13,0:15,0:18,11,0,0	0/1:17,10:0.379:27:4,1:12,9:10,7,4,6	613_T1
chr1	14473790	.	CTT	C	.	PASS	AS_FilterStatus=SITE;AS_SB_TABLE=23,17|1,3;DP=58;ECNT=1;GERMQ=87;MBQ=33,34;MFRL=432,477;MMQ=60,60;MPOS=45;NALOD=1.11;NLOD=6.05;POPAF=6.00;RPA=11,9;RU=T;STR;STRQ=93;TLOD=8.61;ANN=C|intergenic_region|MODIFIER|Eya1-Msc|ENSMUSG00000025932-ENSMUSG00000025930|intergenic_region|ENSMUSG00000025932-ENSMUSG00000025930|||n.14473791_14473792delTT||||||	GT:AD:AF:DP:F1R2:F2R1:SB	0/0:20,0:0.040:20:4,0:14,0:9,11,0,0	0/1:20,4:0.189:24:8,1:11,2:14,6,1,3	613_T1
chr1	14494508	.	T	C	.	PASS	AS_FilterStatus=SITE;AS_SB_TABLE=34,29|7,5;DP=76;ECNT=1;GERMQ=93;MBQ=35,34;MFRL=441,412;MMQ=60,60;MPOS=36;NALOD=1.65;NLOD=13.24;POPAF=6.00;TLOD=37.09;ANN=C|intergenic_region|MODIFIER|Eya1-Msc|ENSMUSG00000025932-ENSMUSG00000025930|intergenic_region|ENSMUSG00000025932-ENSMUSG00000025930|||n.14494508T>C||||||	GT:AD:AF:DP:F1R2:F2R1:SB	0/0:45,0:0.022:45:23,0:22,0:26,19,0,0	0/1:18,12:0.406:30:11,5:7,7:8,10,7,5	2985_T1
chr1	14539342	.	G	GGTGT	.	PASS	AS_FilterStatus=SITE;AS_SB_TABLE=7,16|2,3;DP=46;ECNT=1;GERMQ=32;MBQ=32,25;MFRL=421,454;MMQ=60,60;MPOS=37;NALOD=1.36;NLOD=4.60;POPAF=6.00;RPA=25,27;RU=GT;STR;STRQ=93;TLOD=16.20;ANN=GGTGT|intergenic_region|MODIFIER|Eya1-Msc|ENSMUSG00000025932-ENSMUSG00000025930|intergenic_region|ENSMUSG00000025932-ENSMUSG00000025930|||n.14539342_14539343insGTGT||||||	GT:AD:AF:DP:F1R2:F2R1:SB	0/0:15,0:0.046:15:7,0:6,0:3,12,0,0	0/1:8,5:0.392:13:4,1:3,3:4,4,2,3	613_T1
chr1	14568593	.	A	T	.	PASS	AS_FilterStatus=SITE;AS_SB_TABLE=45,35|5,3;DP=89;ECNT=1;GERMQ=93;MBQ=34,34;MFRL=452,486;MMQ=60,60;MPOS=38;NALOD=1.53;NLOD=9.93;POPAF=6.00;TLOD=20.38;ANN=T|intergenic_region|MODIFIER|Eya1-Msc|ENSMUSG00000025932-ENSMUSG00000025930|intergenic_region|ENSMUSG00000025932-ENSMUSG00000025930|||n.14568593A>T||||||	GT:AD:AF:DP:F1R2:F2R1:SB	0/0:33,0:0.029:33:21,0:12,0:16,17,0,0	0/1:47,8:0.158:55:29,6:18,2:29,18,5,3	613_T1
chr1	14584628	.	AAGAG	A	.	PASS	AS_FilterStatus=SITE;AS_SB_TABLE=24,14|3,2;DP=62;ECNT=1;GERMQ=73;MBQ=34,34;MFRL=459,475;MMQ=60,60;MPOS=40;NALOD=1.38;NLOD=5.35;POPAF=6.00;RPA=17,15;RU=AG;STR;STRQ=93;TLOD=15.56;ANN=A|intergenic_region|MODIFIER|Eya1-Msc|ENSMUSG00000025932-ENSMUSG00000025930|intergenic_region|ENSMUSG00000025932-ENSMUSG00000025930|||n.14584629_14584632delAGAG||||||	GT:AD:AF:DP:F1R2:F2R1:SB	0/0:18,0:0.042:18:12,0:5,0:12,6,0,0	0/1:20,5:0.221:25:11,2:8,3:12,8,3,2	613_T1
chr1	14604580	.	TA	T	.	PASS	AS_FilterStatus=SITE;AS_SB_TABLE=17,34|3,3;DP=63;ECNT=1;GERMQ=93;MBQ=34,35;MFRL=453,477;MMQ=60,60;MPOS=67;NALOD=1.45;NLOD=8.12;POPAF=6.00;RPA=7,6;RU=A;STR;STRQ=93;TLOD=11.49;ANN=T|intergenic_region|MODIFIER|Eya1-Msc|ENSMUSG00000025932-ENSMUSG00000025930|intergenic_region|ENSMUSG00000025932-ENSMUSG00000025930|||n.14604581delA||||||	GT:AD:AF:DP:F1R2:F2R1:SB	0/0:27,0:0.034:27:9,0:14,0:8,19,0,0	0/1:24,6:0.217:30:17,3:5,3:9,15,3,3	613_T1
chr1	14643785	.	C	CACACACACAA	.	PASS	AS_FilterStatus=SITE;AS_SB_TABLE=18,23|4,1;DP=46;ECNT=1;GERMQ=48;MBQ=35,32;MFRL=333,228;MMQ=60,51;MPOS=6;NALOD=1.34;NLOD=6.11;POPAF=6.00;TLOD=16.15;ANN=CACACACACAA|intergenic_region|MODIFIER|Eya1-Msc|ENSMUSG00000025932-ENSMUSG00000025930|intergenic_region|ENSMUSG00000025932-ENSMUSG00000025930|||n.14643785_14643786insACACACACAA||||||	GT:AD:AF:DP:F1R2:F2R1:SB	0/0:21,0:0.043:21:11,0:10,0:8,13,0,0	0/1:20,5:0.214:25:6,1:11,2:10,10,4,1	3147_T1
chr1	14684656	.	T	C	.	PASS	AS_FilterStatus=SITE;AS_SB_TABLE=21,28|2,2;DP=60;ECNT=1;GERMQ=93;MBQ=34,34;MFRL=509,534;MMQ=60,60;MPOS=37;NALOD=1.41;NLOD=6.88;POPAF=6.00;TLOD=8.26;ANN=C|intergenic_region|MODIFIER|Eya1-Msc|ENSMUSG00000025932-ENSMUSG00000025930|intergenic_region|ENSMUSG00000025932-ENSMUSG00000025930|||n.14684656T>C||||||	GT:AD:AF:DP:F1R2:F2R1:SB	0/0:23,0:0.038:23:10,0:12,0:10,13,0,0	0/1:26,4:0.161:30:14,3:10,0:11,15,2,2	613_T1
chr1	14710853	.	G	A	.	PASS	AS_FilterStatus=SITE;AS_SB_TABLE=36,34|3,2;DP=78;ECNT=1;GERMQ=93;MBQ=35,33;MFRL=476,457;MMQ=60,60;MPOS=16;NALOD=1.62;NLOD=11.95;POPAF=6.00;TLOD=11.11;ANN=A|intergenic_region|MODIFIER|Eya1-Msc|ENSMUSG00000025932-ENSMUSG00000025930|intergenic_region|ENSMUSG00000025932-ENSMUSG00000025930|||n.14710853G>A||||||	GT:AD:AF:DP:F1R2:F2R1:SB	0/0:40,0:0.023:40:19,0:19,0:20,20,0,0	0/1:30,5:0.162:35:12,3:17,2:16,14,3,2	2985_T1
chr1	14714519	.	C	A	.	PASS	AS_FilterStatus=SITE;AS_SB_TABLE=29,33|2,1;DP=71;ECNT=1;GERMQ=93;MBQ=35,33;MFRL=416,531;MMQ=60,60;MPOS=37;NALOD=1.60;NLOD=11.09;POPAF=6.00;TLOD=5.81;ANN=A|intergenic_region|MODIFIER|Eya1-Msc|ENSMUSG00000025932-ENSMUSG00000025930|intergenic_region|ENSMUSG00000025932-ENSMUSG00000025930|||n.14714519C>A||||||	GT:AD:AF:DP:F1R2:F2R1:SB	0/0:38,0:0.025:38:20,0:17,0:16,22,0,0	0/1:24,3:0.137:27:13,2:11,1:13,11,2,1	2985_T1
chr1	14719866	.	TAA	T	.	PASS	AS_FilterStatus=SITE;AS_SB_TABLE=20,23|3,1;DP=57;ECNT=1;GERMQ=93;MBQ=34,34;MFRL=428,428;MMQ=60,60;MPOS=30;NALOD=1.49;NLOD=8.12;POPAF=6.00;RPA=15,13;RU=A;STR;STRQ=93;TLOD=9.38;ANN=T|intergenic_region|MODIFIER|Eya1-Msc|ENSMUSG00000025932-ENSMUSG00000025930|intergenic_region|ENSMUSG00000025932-ENSMUSG00000025930|||n.14719867_14719868delAA||||||	GT:AD:AF:DP:F1R2:F2R1:SB	0/0:27,0:0.032:27:14,0:7,0:12,15,0,0	0/1:16,4:0.224:20:6,1:7,3:8,8,3,1	613_T1
chr1	14721191	.	C	A	.	PASS	AS_FilterStatus=SITE;AS_SB_TABLE=36,42|1,2;DP=83;ECNT=1;GERMQ=93;MBQ=34,35;MFRL=464,442;MMQ=60,60;MPOS=59;NALOD=1.62;NLOD=11.99;POPAF=6.00;TLOD=6.29;ANN=A|intergenic_region|MODIFIER|Eya1-Msc|ENSMUSG00000025932-ENSMUSG00000025930|intergenic_region|ENSMUSG00000025932-ENSMUSG00000025930|||n.14721191C>A||||||	GT:AD:AF:DP:F1R2:F2R1:SB	0/0:40,0:0.024:40:20,0:19,0:17,23,0,0	0/1:38,3:0.093:41:17,3:17,0:19,19,1,2	613_T1
chr1	14733688	.	G	T	.	PASS	AS_FilterStatus=SITE;AS_SB_TABLE=31,36|0,3;DP=71;ECNT=1;GERMQ=93;MBQ=34,33;MFRL=458,397;MMQ=60,60;MPOS=38;NALOD=1.62;NLOD=12.04;POPAF=6.00;TLOD=6.23;ANN=T|intergenic_region|MODIFIER|Eya1-Msc|ENSMUSG00000025932-ENSMUSG00000025930|intergenic_region|ENSMUSG00000025932-ENSMUSG00000025930|||n.14733688G>T||||||	GT:AD:AF:DP:F1R2:F2R1:SB	0/0:40,0:0.024:40:21,0:18,0:16,24,0,0	0/1:27,3:0.125:30:16,0:10,3:15,12,0,3	2985_T1
chr1	14768621	.	A	G	.	PASS	AS_FilterStatus=SITE;AS_SB_TABLE=23,27|3,3;DP=58;ECNT=1;GERMQ=93;MBQ=35,31;MFRL=416,421;MMQ=60,60;MPOS=51;NALOD=1.55;NLOD=10.19;POPAF=6.00;TLOD=15.13;ANN=G|intergenic_region|MODIFIER|Gm9947-Smt3h2-ps4|ENSMUSG00000054493-ENSMUSG00000081201|intergenic_region|ENSMUSG00000054493-ENSMUSG00000081201|||n.14768621A>G||||||	GT:AD:AF:DP:F1R2:F2R1:SB	0/0:34,0:0.027:34:17,0:16,0:16,18,0,0	0/1:16,6:0.292:22:9,4:7,2:7,9,3,3	2985_T1
chr1	14813730	.	A	C	.	PASS	AS_FilterStatus=SITE;AS_SB_TABLE=30,21|7,1;DP=60;ECNT=1;GERMQ=90;MBQ=34,32;MFRL=453,456;MMQ=60,60;MPOS=43;NALOD=1.43;NLOD=7.34;POPAF=6.00;TLOD=21.05;ANN=C|intergenic_region|MODIFIER|Gm9947-Smt3h2-ps4|ENSMUSG00000054493-ENSMUSG00000081201|intergenic_region|ENSMUSG00000054493-ENSMUSG00000081201|||n.14813730A>C||||||	GT:AD:AF:DP:F1R2:F2R1:SB	0/0:26,0:0.036:26:18,0:8,0:15,11,0,0	0/1:25,8:0.258:33:11,6:13,2:15,10,7,1	2985_T1
chr1	14850014	.	CA	C	.	PASS	AS_FilterStatus=SITE;AS_SB_TABLE=14,16|9,6;DP=53;ECNT=1;GERMQ=46;MBQ=34,35;MFRL=412,462;MMQ=60,60;MPOS=40;NALOD=1.04;NLOD=5.35;POPAF=6.00;RPA=16,15;RU=A;STR;STRQ=17;TLOD=25.11;ANN=C|intergenic_region|MODIFIER|Smt3h2-ps4-Rpl5-ps1|ENSMUSG00000081201-ENSMUSG00000082193|intergenic_region|ENSMUSG00000081201-ENSMUSG00000082193|||n.14850015delA||||||	GT:AD:AF:DP:F1R2:F2R1:SB	0/0:18,0:0.046:18:4,0:11,0:7,11,0,0	0/1:12,15:0.577:27:5,8:4,6:7,5,9,6	3147_T1
chr1	14876071	.	C	T	.	PASS	AS_FilterStatus=SITE;AS_SB_TABLE=38,28|2,2;DP=71;ECNT=1;GERMQ=93;MBQ=33,35;MFRL=445,436;MMQ=60,60;MPOS=59;NALOD=1.64;NLOD=12.54;POPAF=6.00;TLOD=10.15;ANN=T|intron_variant|MODIFIER|Trpa1|ENSMUSG00000032769|transcript|ENSMUST00000041447|protein_coding|24/26|c.2947-112G>A||||||	GT:AD:AF:DP:F1R2:F2R1:SB	0/0:42,0:0.023:42:19,0:20,0:24,18,0,0	0/1:24,4:0.168:28:9,1:13,3:14,10,2,2	613_T1
chr1	14879792	.	C	T	.	PASS	AS_FilterStatus=SITE;AS_SB_TABLE=43,40|3,8;DP=97;ECNT=2;GERMQ=93;MBQ=34,34;MFRL=435,553;MMQ=60,60;MPOS=28;NALOD=1.57;NLOD=10.53;POPAF=6.00;TLOD=29.44;ANN=T|intron_variant|MODIFIER|Trpa1|ENSMUSG00000032769|transcript|ENSMUST00000041447|protein_coding|24/26|c.2946+407G>A||||||	GT:AD:AF:DP:F1R2:F2R1:PGT:PID:PS:SB	0|0:38,0:0.026:38:7,0:30,0:0|1:14879792_C_T:14879792:19,19,0,0	0|1:45,11:0.208:56:19,5:24,6:0|1:14879792_C_T:14879792:24,21,3,8	613_T1
chr1	14924798	.	AG	A	.	PASS	AS_FilterStatus=SITE;AS_SB_TABLE=31,36|3,2;DP=78;ECNT=1;GERMQ=93;MBQ=36,34;MFRL=427,428;MMQ=60,60;MPOS=51;NALOD=1.65;NLOD=12.31;POPAF=6.00;RPA=7,6;RU=G;STR;STRQ=93;TLOD=5.80;ANN=A|intergenic_region|MODIFIER|Trpa1-Gm26345|ENSMUSG00000032769-ENSMUSG00000088159|intergenic_region|ENSMUSG00000032769-ENSMUSG00000088159|||n.14924799delG||||||	GT:AD:AF:DP:F1R2:F2R1:SB	0/0:41,0:0.022:41:20,0:20,0:16,25,0,0	0/1:26,5:0.154:31:12,4:11,1:15,11,3,2	2985_T1
chr1	14945026	.	TACAC	T	.	PASS	AS_FilterStatus=SITE;AS_SB_TABLE=23,9|1,2;DP=46;ECNT=1;GERMQ=68;MBQ=34,33;MFRL=385,464;MMQ=60,60;MPOS=64;NALOD=1.42;NLOD=6.27;POPAF=6.00;RPA=16,14;RU=AC;STR;STRQ=93;TLOD=9.69;ANN=T|intergenic_region|MODIFIER|Trpa1-Gm26345|ENSMUSG00000032769-ENSMUSG00000088159|intergenic_region|ENSMUSG00000032769-ENSMUSG00000088159|||n.14945027_14945030delACAC||||||	GT:AD:AF:DP:F1R2:F2R1:SB	0/0:21,0:0.038:21:6,0:10,0:14,7,0,0	0/1:11,3:0.248:14:3,3:8,0:9,2,1,2	3147_T1
chr1	14955266	.	A	G	.	PASS	AS_FilterStatus=SITE;AS_SB_TABLE=29,36|1,2;DP=72;ECNT=1;GERMQ=93;MBQ=34,33;MFRL=437,503;MMQ=60,60;MPOS=41;NALOD=1.58;NLOD=11.14;POPAF=6.00;TLOD=6.73;ANN=G|intergenic_region|MODIFIER|Trpa1-Gm26345|ENSMUSG00000032769-ENSMUSG00000088159|intergenic_region|ENSMUSG00000032769-ENSMUSG00000088159|||n.14955266A>G||||||	GT:AD:AF:DP:F1R2:F2R1:SB	0/0:39,0:0.026:39:19,0:20,0:20,19,0,0	0/1:26,3:0.132:29:13,3:13,0:9,17,1,2	613_T1
chr1	15007988	.	C	T	.	PASS	AS_FilterStatus=SITE;AS_SB_TABLE=23,42|1,2;DP=70;ECNT=1;GERMQ=93;MBQ=36,33;MFRL=403,348;MMQ=60,60;MPOS=37;NALOD=1.55;NLOD=10.23;POPAF=6.00;TLOD=6.22;ANN=T|intergenic_region|MODIFIER|Trpa1-Gm26345|ENSMUSG00000032769-ENSMUSG00000088159|intergenic_region|ENSMUSG00000032769-ENSMUSG00000088159|||n.15007988C>T||||||	GT:AD:AF:DP:F1R2:F2R1:SB	0/0:36,0:0.027:36:17,0:19,0:11,25,0,0	0/1:29,3:0.118:32:14,2:14,1:12,17,1,2	2985_T1
chr1	15011474	.	C	T	.	PASS	AS_FilterStatus=SITE;AS_SB_TABLE=29,38|3,6;DP=78;ECNT=1;GERMQ=93;MBQ=35,34;MFRL=446,431;MMQ=60,60;MPOS=31;NALOD=1.66;NLOD=13.10;POPAF=6.00;TLOD=25.48;ANN=T|intergenic_region|MODIFIER|Trpa1-Gm26345|ENSMUSG00000032769-ENSMUSG00000088159|intergenic_region|ENSMUSG00000032769-ENSMUSG00000088159|||n.15011474C>T||||||	GT:AD:AF:DP:F1R2:F2R1:SB	0/0:44,0:0.022:44:25,0:16,0:21,23,0,0	0/1:23,9:0.303:32:10,4:13,5:8,15,3,6	2985_T1
chr1	15063406	.	C	A	.	PASS	AS_FilterStatus=SITE;AS_SB_TABLE=40,20|4,2;DP=69;ECNT=1;GERMQ=93;MBQ=34,34;MFRL=446,500;MMQ=60,60;MPOS=20;NALOD=1.58;NLOD=10.84;POPAF=6.00;TLOD=13.89;ANN=A|intergenic_region|MODIFIER|Gm26345-Gm10566|ENSMUSG00000088159-ENSMUSG00000073737|intergenic_region|ENSMUSG00000088159-ENSMUSG00000073737|||n.15063406C>A||||||	GT:AD:AF:DP:F1R2:F2R1:SB	0/0:36,0:0.026:36:18,0:18,0:23,13,0,0	0/1:24,6:0.218:30:10,3:14,3:17,7,4,2	2985_T1
chr1	15078204	.	G	T	.	PASS	AS_FilterStatus=SITE;AS_SB_TABLE=26,17|2,1;DP=48;ECNT=1;GERMQ=93;MBQ=35,34;MFRL=433,436;MMQ=60,60;MPOS=47;NALOD=1.40;NLOD=7.13;POPAF=6.00;TLOD=6.97;ANN=T|intergenic_region|MODIFIER|Gm26345-Gm10566|ENSMUSG00000088159-ENSMUSG00000073737|intergenic_region|ENSMUSG00000088159-ENSMUSG00000073737|||n.15078204G>T||||||	GT:AD:AF:DP:F1R2:F2R1:SB	0/0:24,0:0.038:24:9,0:13,0:15,9,0,0	0/1:19,3:0.166:22:5,0:12,3:11,8,2,1	2985_T1
chr1	15108451	.	CTT	C	.	PASS	AS_FilterStatus=SITE;AS_SB_TABLE=26,28|5,3;DP=74;ECNT=1;GERMQ=93;MBQ=33,33;MFRL=456,444;MMQ=60,60;MPOS=15;NALOD=1.21;NLOD=8.26;POPAF=6.00;RPA=13,11;RU=T;STR;STRQ=93;TLOD=14.06;ANN=C|intergenic_region|MODIFIER|Gm26345-Gm10566|ENSMUSG00000088159-ENSMUSG00000073737|intergenic_region|ENSMUSG00000088159-ENSMUSG00000073737|||n.15108452_15108453delTT||||||	GT:AD:AF:DP:F1R2:F2R1:SB	0/0:28,0:0.031:28:9,0:15,0:12,16,0,0	0/1:26,8:0.246:34:10,3:13,5:14,12,5,3	613_T1
chr1	15115762	.	TA	T	.	PASS	AS_FilterStatus=SITE;AS_SB_TABLE=43,33|4,1;DP=87;ECNT=1;GERMQ=93;MBQ=34,36;MFRL=499,539;MMQ=60,60;MPOS=21;NALOD=1.64;NLOD=12.62;POPAF=6.00;RPA=7,6;RU=A;STR;STRQ=93;TLOD=8.42;ANN=T|intergenic_region|MODIFIER|Gm26345-Gm10566|ENSMUSG00000088159-ENSMUSG00000073737|intergenic_region|ENSMUSG00000088159-ENSMUSG00000073737|||n.15115763delA||||||	GT:AD:AF:DP:F1R2:F2R1:SB	0/0:43,0:0.022:43:17,0:26,0:23,20,0,0	0/1:33,5:0.153:38:14,2:17,3:20,13,4,1	613_T1
chr1	15178604	.	TAA	T	.	PASS	AS_FilterStatus=SITE;AS_SB_TABLE=19,21|3,4;DP=61;ECNT=1;GERMQ=79;MBQ=34,34;MFRL=410,518;MMQ=60,60;MPOS=50;NALOD=1.22;NLOD=7.81;POPAF=6.00;RPA=17,15;RU=A;STR;STRQ=93;TLOD=6.89;ANN=T|intergenic_region|MODIFIER|Gm26345-Gm10566|ENSMUSG00000088159-ENSMUSG00000073737|intergenic_region|ENSMUSG00000088159-ENSMUSG00000073737|||n.15178605_15178606delAA||||||	GT:AD:AF:DP:F1R2:F2R1:SB	0/0:26,0:0.031:26:8,0:10,0:12,14,0,0	0/1:14,7:0.342:21:5,3:6,2:7,7,3,4	613_T1
chr1	15188771	.	TAAA	T	.	PASS	AS_FilterStatus=SITE;AS_SB_TABLE=6,10|1,3;DP=32;ECNT=1;GERMQ=16;MBQ=12,22;MFRL=444,604;MMQ=60,60;MPOS=30;NALOD=0.842;NLOD=2.80;POPAF=6.00;RPA=28,25;RU=A;STR;STRQ=93;TLOD=8.86;ANN=T|intergenic_region|MODIFIER|Gm26345-Gm10566|ENSMUSG00000088159-ENSMUSG00000073737|intergenic_region|ENSMUSG00000088159-ENSMUSG00000073737|||n.15188772_15188774delAAA||||||	GT:AD:AF:DP:F1R2:F2R1:SB	0/0:10,0:0.073:10:3,0:4,0:6,4,0,0	0/1:6,4:0.429:10:0,1:0,1:0,6,1,3	2985_T1
chr1	15195840	.	CAA	C	.	PASS	AS_FilterStatus=SITE;AS_SB_TABLE=9,17|3,1;DP=45;ECNT=1;GERMQ=49;MBQ=33,33;MFRL=463,440;MMQ=60,60;MPOS=45;NALOD=0.653;NLOD=3.59;POPAF=6.00;RPA=23,21;RU=A;STR;STRQ=93;TLOD=6.89;ANN=C|intergenic_region|MODIFIER|Gm26345-Gm10566|ENSMUSG00000088159-ENSMUSG00000073737|intergenic_region|ENSMUSG00000088159-ENSMUSG00000073737|||n.15195841_15195842delAA||||||	GT:AD:AF:DP:F1R2:F2R1:SB	0/0:12,0:0.059:12:3,0:5,0:5,7,0,0	0/1:14,4:0.248:18:2,2:6,1:4,10,3,1	613_T1
chr1	15305801	.	AACAC	A	.	PASS	AS_FilterStatus=SITE;AS_SB_TABLE=10,12|3,0;DP=38;ECNT=1;GERMQ=36;MBQ=34,34;MFRL=541,330;MMQ=60,60;MPOS=61;NALOD=0.897;NLOD=3.12;POPAF=6.00;RPA=22,20;RU=AC;STR;STRQ=93;TLOD=9.91;ANN=A|intragenic_variant|MODIFIER|Kcnb2|ENSMUSG00000092083|gene_variant|ENSMUSG00000092083|||n.15305843_15305846delCACA||||||	GT:AD:AF:DP:F1R2:F2R1:SB	0/0:11,0:0.066:11:5,0:5,0:4,7,0,0	0/1:11,3:0.246:14:6,1:4,2:6,5,3,0	3147_T1
chr1	15375251	.	C	A	.	PASS	AS_FilterStatus=SITE;AS_SB_TABLE=26,30|2,1;DP=61;ECNT=1;GERMQ=93;MBQ=34,35;MFRL=442,297;MMQ=60,60;MPOS=18;NALOD=1.42;NLOD=7.52;POPAF=6.00;TLOD=6.52;ANN=A|intron_variant|MODIFIER|Kcnb2|ENSMUSG00000092083|transcript|ENSMUST00000171715|protein_coding|1/1|c.579+62221C>A||||||	GT:AD:AF:DP:F1R2:F2R1:SB	0/0:25,0:0.036:25:10,0:15,0:15,10,0,0	0/1:31,3:0.112:34:20,3:7,0:11,20,2,1	613_T1
chr1	15433761	.	GTT	G	.	PASS	AS_FilterStatus=SITE;AS_SB_TABLE=24,38|1,2;DP=78;ECNT=1;GERMQ=93;MBQ=32,32;MFRL=435,357;MMQ=60,60;MPOS=47;NALOD=1.25;NLOD=9.31;POPAF=6.00;RPA=13,11;RU=T;STR;STRQ=93;TLOD=5.30;ANN=G|intron_variant|MODIFIER|Kcnb2|ENSMUSG00000092083|transcript|ENSMUST00000171715|protein_coding|1/1|c.579+120743_579+120744delTT||||||INFO_REALIGN_3_PRIME	GT:AD:AF:DP:F1R2:F2R1:SB	0/0:32,0:0.028:32:15,0:12,0:12,20,0,0	0/1:30,3:0.113:33:9,2:17,0:12,18,1,2	613_T1
chr1	15447196	.	CT	C	.	PASS	AS_FilterStatus=SITE;AS_SB_TABLE=28,30|3,3;DP=68;ECNT=1;GERMQ=93;MBQ=35,35;MFRL=441,462;MMQ=60,60;MPOS=56;NALOD=1.50;NLOD=9.02;POPAF=6.00;RPA=7,6;RU=T;STR;STRQ=93;TLOD=10.99;ANN=C|intron_variant|MODIFIER|Kcnb2|ENSMUSG00000092083|transcript|ENSMUST00000171715|protein_coding|1/1|c.579+134173delT||||||INFO_REALIGN_3_PRIME	GT:AD:AF:DP:F1R2:F2R1:SB	0/0:31,0:0.030:31:14,0:16,0:14,17,0,0	0/1:27,6:0.199:33:13,4:14,2:14,13,3,3	613_T1
chr1	15455756	.	A	T	.	PASS	AS_FilterStatus=SITE;AS_SB_TABLE=24,36|2,5;DP=70;ECNT=1;GERMQ=93;MBQ=34,33;MFRL=421,391;MMQ=60,60;MPOS=53;NALOD=1.30;NLOD=10.79;POPAF=6.00;TLOD=15.08;ANN=T|intron_variant|MODIFIER|Kcnb2|ENSMUSG00000092083|transcript|ENSMUST00000171715|protein_coding|1/1|c.579+142726A>T||||||	GT:AD:AF:DP:F1R2:F2R1:SB	0/0:37,0:0.025:37:21,0:15,0:13,24,0,0	0/1:23,7:0.250:30:13,4:9,3:11,12,2,5	2985_T1
chr1	15595135	.	G	T	.	PASS	AS_FilterStatus=SITE;AS_SB_TABLE=25,29|1,3;DP=58;ECNT=1;GERMQ=93;MBQ=33,33;MFRL=427,424;MMQ=60,60;MPOS=59;NALOD=1.52;NLOD=9.49;POPAF=6.00;TLOD=9.73;ANN=T|intron_variant|MODIFIER|Kcnb2|ENSMUSG00000092083|transcript|ENSMUST00000171715|protein_coding|1/1|c.580-114350G>T||||||	GT:AD:AF:DP:F1R2:F2R1:SB	0/0:33,0:0.029:33:18,0:11,0:16,17,0,0	0/1:21,4:0.189:25:15,1:6,3:9,12,1,3	2985_T1
chr1	15667825	.	C	A	.	PASS	AS_FilterStatus=SITE;AS_SB_TABLE=26,40|1,3;DP=72;ECNT=1;GERMQ=93;MBQ=35,34;MFRL=428,467;MMQ=60,60;MPOS=24;NALOD=1.57;NLOD=10.83;POPAF=6.00;TLOD=9.17;ANN=A|intron_variant|MODIFIER|Kcnb2|ENSMUSG00000092083|transcript|ENSMUST00000171715|protein_coding|1/1|c.580-41660C>A||||||	GT:AD:AF:DP:F1R2:F2R1:SB	0/0:37,0:0.026:37:10,0:27,0:16,21,0,0	0/1:29,4:0.143:33:9,2:19,2:10,19,1,3	2985_T1
chr1	15711958	.	C	T	.	PASS	AS_FilterStatus=SITE;AS_SB_TABLE=25,25|2,3;DP=56;ECNT=1;GERMQ=93;MBQ=35,34;MFRL=420,418;MMQ=60,60;MPOS=32;NALOD=1.54;NLOD=9.84;POPAF=6.00;TLOD=13.83;ANN=T|upstream_gene_variant|MODIFIER|Kcnb2|ENSMUSG00000090498|transcript|ENSMUST00000170146|protein_coding||c.-769C>T|||||345|,T|downstream_gene_variant|MODIFIER|Kcnb2|ENSMUSG00000092083|transcript|ENSMUST00000171715|protein_coding||c.*329C>T|||||329…	GT:AD:AF:DP:F1R2:F2R1:SB	0/0:33,0:0.028:33:16,0:15,0:15,18,0,0	0/1:17,5:0.261:22:9,2:8,3:10,7,2,3	3147_T1
chr1	15758056	.	G	T	.	PASS	AS_FilterStatus=SITE;AS_SB_TABLE=27,32|2,4;DP=69;ECNT=1;GERMQ=93;MBQ=34,34;MFRL=439,470;MMQ=60,60;MPOS=44;NALOD=1.43;NLOD=7.52;POPAF=6.00;TLOD=15.44;ANN=T|downstream_gene_variant|MODIFIER|Gm25168|ENSMUSG00000077377|transcript|ENSMUST00000104189|snoRNA||n.*93G>T|||||93|,T|intergenic_region|MODIFIER|Gm25168-Terf1|ENSMUSG00000077377-ENSMUSG00000025925|intergenic_region|ENSMUSG00000077377-ENSMUSG0000…	GT:AD:AF:DP:F1R2:F2R1:SB	0/0:26,0:0.036:26:13,0:13,0:14,12,0,0	0/1:33,6:0.170:39:19,4:14,2:13,20,2,4	2985_T1
chr1	15764766	.	A	C	.	PASS	AS_FilterStatus=SITE;AS_SB_TABLE=22,25|4,2;DP=54;ECNT=1;GERMQ=93;MBQ=34,33;MFRL=436,389;MMQ=40,41;MPOS=39;NALOD=1.49;NLOD=9.02;POPAF=6.00;TLOD=15.31;ANN=C|intergenic_region|MODIFIER|Gm25168-Terf1|ENSMUSG00000077377-ENSMUSG00000025925|intergenic_region|ENSMUSG00000077377-ENSMUSG00000025925|||n.15764766A>C||||||	GT:AD:AF:DP:F1R2:F2R1:SB	0/0:31,0:0.031:31:16,0:15,0:14,17,0,0	0/1:16,6:0.291:22:6,3:10,3:8,8,4,2	2985_T1
chr1	15794098	.	G	T	.	PASS	AS_FilterStatus=SITE;AS_SB_TABLE=35,21|4,6;DP=67;ECNT=1;GERMQ=93;MBQ=29,34;MFRL=457,397;MMQ=60,60;MPOS=41;NALOD=1.55;NLOD=10.23;POPAF=6.00;TLOD=29.84;ANN=T|intergenic_region|MODIFIER|Gm25168-Terf1|ENSMUSG00000077377-ENSMUSG00000025925|intergenic_region|ENSMUSG00000077377-ENSMUSG00000025925|||n.15794098G>T||||||	GT:AD:AF:DP:F1R2:F2R1:SB	0/0:34,0:0.027:34:15,0:19,0:23,11,0,0	0/1:22,10:0.324:32:13,7:9,3:12,10,4,6	2985_T1
chr1	15818019	.	CA	C	.	PASS	AS_FilterStatus=SITE;AS_SB_TABLE=35,47|1,4;DP=89;ECNT=1;GERMQ=93;MBQ=36,36;MFRL=439,447;MMQ=60,60;MPOS=69;NALOD=1.73;NLOD=15.33;POPAF=6.00;RPA=7,6;RU=A;STR;STRQ=93;TLOD=8.50;ANN=C|intron_variant|MODIFIER|Terf1|ENSMUSG00000025925|transcript|ENSMUST00000027057|protein_coding|4/9|c.586-908delA||||||INFO_REALIGN_3_PRIME	GT:AD:AF:DP:F1R2:F2R1:SB	0/0:51,0:0.018:51:27,0:22,0:25,26,0,0	0/1:31,5:0.157:36:14,3:17,2:10,21,1,4	2985_T1
chr1	15828867	.	TC	T	.	PASS	AS_FilterStatus=SITE;AS_SB_TABLE=33,34|6,1;DP=76;ECNT=1;GERMQ=93;MBQ=35,35;MFRL=447,508;MMQ=60,60;MPOS=42;NALOD=1.67;NLOD=13.23;POPAF=6.00;RPA=4,3;RU=C;STR;STRQ=93;TLOD=16.32;ANN=T|intron_variant|MODIFIER|Terf1|ENSMUSG00000025925|transcript|ENSMUST00000027057|protein_coding|6/9|c.849-2636delC||||||INFO_REALIGN_3_PRIME	GT:AD:AF:DP:F1R2:F2R1:SB	0/0:44,0:0.021:44:22,0:20,0:21,23,0,0	0/1:23,7:0.249:30:12,4:11,3:12,11,6,1	3147_T1
chr1	15829911	.	CT	C	.	PASS	AS_FilterStatus=SITE;AS_SB_TABLE=33,18|11,7;DP=83;ECNT=1;GERMQ=93;MBQ=33,33;MFRL=419,445;MMQ=60,60;MPOS=46;NALOD=1.59;NLOD=10.14;POPAF=6.00;RPA=13,12;RU=T;STR;STRQ=27;TLOD=35.21;ANN=C|intron_variant|MODIFIER|Terf1|ENSMUSG00000025925|transcript|ENSMUST00000027057|protein_coding|6/9|c.849-1583delT||||||INFO_REALIGN_3_PRIME	GT:AD:AF:DP:F1R2:F2R1:SB	0/0:35,0:0.025:35:14,0:19,0:23,12,0,0	0/1:16,18:0.526:34:7,6:8,10:10,6,11,7	613_T1
chr1	15836030	.	AT	A	.	PASS	AS_FilterStatus=SITE;AS_SB_TABLE=34,25|3,2;DP=71;ECNT=1;GERMQ=93;MBQ=34,34;MFRL=426,397;MMQ=60,60;MPOS=31;NALOD=1.49;NLOD=8.10;POPAF=6.00;RPA=7,6;RU=T;STR;STRQ=93;TLOD=8.42;ANN=A|intron_variant|MODIFIER|Terf1|ENSMUSG00000025925|transcript|ENSMUST00000027057|protein_coding|8/9|c.998-2145delT||||||INFO_REALIGN_3_PRIME	GT:AD:AF:DP:F1R2:F2R1:SB	0/0:28,0:0.032:28:13,0:14,0:16,12,0,0	0/1:31,5:0.156:36:21,4:10,1:18,13,3,2	613_T1
chr1	15852961	.	C	T	.	PASS	AS_FilterStatus=SITE;AS_SB_TABLE=30,38|2,3;DP=77;ECNT=1;GERMQ=93;MBQ=35,34;MFRL=455,375;MMQ=60,60;MPOS=22;NALOD=1.59;NLOD=11.14;POPAF=6.00;TLOD=12.44;ANN=T|downstream_gene_variant|MODIFIER|Sbspon|ENSMUSG00000032719|transcript|ENSMUST00000040695|protein_coding||c.*2784G>A|||||901|,T|intergenic_region|MODIFIER|Terf1-Sbspon|ENSMUSG00000025925-ENSMUSG00000032719|intergenic_region|ENSMUSG00000025925-E…	GT:AD:AF:DP:F1R2:F2R1:SB	0/0:37,0:0.025:37:18,0:19,0:17,20,0,0	0/1:31,5:0.158:36:9,3:20,2:13,18,2,3	2985_T1
chr1	15901737	.	CTGTG	C	.	PASS	AS_FilterStatus=SITE;AS_SB_TABLE=11,13|2,5;DP=55;ECNT=1;GERMQ=29;MBQ=33,33;MFRL=434,446;MMQ=60,60;MPOS=51;NALOD=0.701;NLOD=3.54;POPAF=6.00;RPA=21,19;RU=TG;STR;STRQ=93;TLOD=14.12;ANN=C|intergenic_region|MODIFIER|Sbspon-4930444P10Rik|ENSMUSG00000032719-ENSMUSG00000067795|intergenic_region|ENSMUSG00000032719-ENSMUSG00000067795|||n.15901738_15901741delTGTG||||||	GT:AD:AF:DP:F1R2:F2R1:SB	0/0:13,0:0.058:13:7,0:3,0:6,7,0,0	0/1:11,7:0.408:18:2,3:5,3:5,6,2,5	2985_T1
chr1	15902214	.	ACCC	A	.	PASS	AS_FilterStatus=SITE;AS_SB_TABLE=0,16|2,2;DP=25;ECNT=1;GERMQ=18;MBQ=36,36;MFRL=384,438;MMQ=60,60;MPOS=44;NALOD=0.690;NLOD=2.97;POPAF=6.00;RPA=13,10;RU=C;STR;STRQ=93;TLOD=9.92;ANN=A|intergenic_region|MODIFIER|Sbspon-4930444P10Rik|ENSMUSG00000032719-ENSMUSG00000067795|intergenic_region|ENSMUSG00000032719-ENSMUSG00000067795|||n.15902215_15902217delCCC||||||	GT:AD:AF:DP:F1R2:F2R1:SB	0/0:10,0:0.074:10:1,0:7,0:0,10,0,0	0/1:6,4:0.411:10:1,1:5,3:0,6,2,2	2985_T1
chr1	15920430	.	AC	A	.	PASS	AS_FilterStatus=SITE;AS_SB_TABLE=36,23|6,3;DP=70;ECNT=1;GERMQ=93;MBQ=34,34;MFRL=440,442;MMQ=60,60;MPOS=50;NALOD=1.50;NLOD=8.72;POPAF=6.00;RPA=4,3;RU=C;STR;STRQ=93;TLOD=17.71;ANN=A|intergenic_region|MODIFIER|Sbspon-4930444P10Rik|ENSMUSG00000032719-ENSMUSG00000067795|intergenic_region|ENSMUSG00000032719-ENSMUSG00000067795|||n.15920431delC||||||	GT:AD:AF:DP:F1R2:F2R1:SB	0/0:29,0:0.031:29:15,0:14,0:18,11,0,0	0/1:30,9:0.225:39:13,3:17,6:18,12,6,3	613_T1
chr1	15959960	.	C	A	.	PASS	AS_FilterStatus=SITE;AS_SB_TABLE=33,34|5,6;DP=81;ECNT=1;GERMQ=93;MBQ=34,34;MFRL=465,407;MMQ=60,60;MPOS=45;NALOD=1.58;NLOD=10.79;POPAF=6.00;TLOD=27.99;ANN=A|intergenic_region|MODIFIER|Sbspon-4930444P10Rik|ENSMUSG00000032719-ENSMUSG00000067795|intergenic_region|ENSMUSG00000032719-ENSMUSG00000067795|||n.15959960C>A||||||	GT:AD:AF:DP:F1R2:F2R1:SB	0/0:36,0:0.026:36:18,0:16,0:19,17,0,0	0/1:31,11:0.269:42:13,4:16,6:14,17,5,6	2985_T1
chr1	15982487	.	T	C	.	PASS	AS_FilterStatus=SITE;AS_SB_TABLE=33,34|4,3;DP=78;ECNT=1;GERMQ=93;MBQ=36,33;MFRL=421,389;MMQ=60,60;MPOS=31;NALOD=1.60;NLOD=11.44;POPAF=6.00;TLOD=17.03;ANN=C|intergenic_region|MODIFIER|Sbspon-4930444P10Rik|ENSMUSG00000032719-ENSMUSG00000067795|intergenic_region|ENSMUSG00000032719-ENSMUSG00000067795|||n.15982487T>C||||||	GT:AD:AF:DP:F1R2:F2R1:SB	0/0:38,0:0.025:38:20,0:18,0:18,20,0,0	0/1:29,7:0.210:36:14,3:15,4:15,14,4,3	2985_T1
chr1	16059181	.	GA	G	.	PASS	AS_FilterStatus=SITE;AS_SB_TABLE=22,23|10,4;DP=68;ECNT=1;GERMQ=83;MBQ=34,35;MFRL=419,424;MMQ=60,60;MPOS=51;NALOD=1.53;NLOD=8.99;POPAF=6.00;RPA=13,12;RU=A;STR;STRQ=4;TLOD=27.54;ANN=G|intergenic_region|MODIFIER|Sbspon-4930444P10Rik|ENSMUSG00000032719-ENSMUSG00000067795|intergenic_region|ENSMUSG00000032719-ENSMUSG00000067795|||n.16059182delA||||||	GT:AD:AF:DP:F1R2:F2R1:SB	0/0:30,0:0.029:30:14,0:13,0:15,15,0,0	0/1:15,14:0.484:29:6,9:9,5:7,8,10,4	613_T1
chr1	16107820	.	GC	G	.	PASS	AS_FilterStatus=SITE;AS_SB_TABLE=42,30|4,4;DP=84;ECNT=1;GERMQ=93;MBQ=36,35;MFRL=426,457;MMQ=60,60;MPOS=31;NALOD=1.64;NLOD=12.63;POPAF=6.00;RPA=5,4;RU=C;STR;STRQ=93;TLOD=17.19;ANN=G|frameshift_variant|HIGH|Rdh10|ENSMUSG00000025921|transcript|ENSMUST00000027053|protein_coding|2/6|c.320delC|p.Pro107fs|564/3587|320/1026|107/341||INFO_REALIGN_3_PRIME,G|upstream_gene_variant|MODIFIER|Rpl7|ENSMUSG000000…	GT:AD:AF:DP:F1R2:F2R1:SB	0/0:43,0:0.022:43:21,0:21,0:29,14,0,0	0/1:29,8:0.242:37:8,6:19,2:13,16,4,4	2985_T1
chr1	16132289	.	AT	A	.	PASS	AS_FilterStatus=SITE;AS_SB_TABLE=18,38|4,2;DP=66;ECNT=1;GERMQ=93;MBQ=34,34;MFRL=448,420;MMQ=60,60;MPOS=36;NALOD=1.53;NLOD=9.32;POPAF=6.00;RPA=7,6;RU=T;STR;STRQ=93;TLOD=11.31;ANN=A|3_prime_UTR_variant|MODIFIER|Rdh10|ENSMUSG00000025921|transcript|ENSMUST00000027053|protein_coding|6/6|c.*879delT|||||879|INFO_REALIGN_3_PRIME	GT:AD:AF:DP:F1R2:F2R1:SB	0/0:31,0:0.029:31:18,0:12,0:12,19,0,0	0/1:25,6:0.211:31:10,4:15,2:6,19,4,2	3147_T1
chr1	16186524	.	ACTCT	A	.	PASS	AS_FilterStatus=SITE;AS_SB_TABLE=15,6|1,2;DP=47;ECNT=1;GERMQ=39;MBQ=34,34;MFRL=412,376;MMQ=60,60;MPOS=70;NALOD=0.797;NLOD=3.23;POPAF=6.00;RPA=23,21;RU=CT;STR;STRQ=93;TLOD=7.28;ANN=A|intergenic_region|MODIFIER|Rdh10-Stau2|ENSMUSG00000025921-ENSMUSG00000025920|intergenic_region|ENSMUSG00000025921-ENSMUSG00000025920|||n.16186525_16186528delCTCT||||||	GT:AD:AF:DP:F1R2:F2R1:SB	0/0:11,0:0.061:11:3,0:7,0:9,2,0,0	0/1:10,3:0.265:13:3,2:5,1:6,4,1,2	613_T1
chr1	16188514	.	G	T	.	PASS	AS_FilterStatus=SITE;AS_SB_TABLE=19,29|1,4;DP=55;ECNT=1;GERMQ=93;MBQ=33,33;MFRL=456,367;MMQ=60,60;MPOS=8;NALOD=1.45;NLOD=8.08;POPAF=6.00;TLOD=12.85;ANN=T|intergenic_region|MODIFIER|Rdh10-Stau2|ENSMUSG00000025921-ENSMUSG00000025920|intergenic_region|ENSMUSG00000025921-ENSMUSG00000025920|||n.16188514G>T||||||	GT:AD:AF:DP:F1R2:F2R1:SB	0/0:27,0:0.034:27:14,0:12,0:9,18,0,0	0/1:21,5:0.223:26:13,1:7,4:10,11,1,4	3147_T1
chr1	16194050	.	C	T	.	PASS	AS_FilterStatus=SITE;AS_SB_TABLE=34,42|3,4;DP=86;ECNT=1;GERMQ=93;MBQ=34,35;MFRL=437,426;MMQ=60,60;MPOS=27;NALOD=1.55;NLOD=10.23;POPAF=6.00;TLOD=16.40;ANN=T|intergenic_region|MODIFIER|Rdh10-Stau2|ENSMUSG00000025921-ENSMUSG00000025920|intergenic_region|ENSMUSG00000025921-ENSMUSG00000025920|||n.16194050C>T||||||	GT:AD:AF:DP:F1R2:F2R1:SB	0/0:36,0:0.027:36:14,0:22,0:15,21,0,0	0/1:40,7:0.149:47:16,3:24,4:19,21,3,4	613_T1
chr1	16197630	.	GA	G	.	PASS	AS_FilterStatus=SITE;AS_SB_TABLE=30,34|2,4;DP=72;ECNT=1;GERMQ=93;MBQ=34,33;MFRL=437,446;MMQ=60,60;MPOS=48;NALOD=1.58;NLOD=10.80;POPAF=6.00;RPA=7,6;RU=A;STR;STRQ=93;TLOD=11.02;ANN=G|intergenic_region|MODIFIER|Rdh10-Stau2|ENSMUSG00000025921-ENSMUSG00000025920|intergenic_region|ENSMUSG00000025921-ENSMUSG00000025920|||n.16197631delA||||||	GT:AD:AF:DP:F1R2:F2R1:SB	0/0:36,0:0.026:36:20,0:15,0:18,18,0,0	0/1:28,6:0.194:34:14,3:14,3:12,16,2,4	3147_T1
chr1	16201084	.	ATGTG	A	.	PASS	AS_FilterStatus=SITE;AS_SB_TABLE=12,15|1,2;DP=51;ECNT=1;GERMQ=55;MBQ=34,35;MFRL=434,400;MMQ=60,60;MPOS=24;NALOD=1.09;NLOD=5.02;POPAF=6.00;RPA=19,17;RU=TG;STR;STRQ=93;TLOD=10.06;ANN=A|intergenic_region|MODIFIER|Rdh10-Stau2|ENSMUSG00000025921-ENSMUSG00000025920|intergenic_region|ENSMUSG00000025921-ENSMUSG00000025920|||n.16201085_16201088delTGTG||||||	GT:AD:AF:DP:F1R2:F2R1:SB	0/0:17,0:0.043:17:7,0:7,0:6,11,0,0	0/1:10,3:0.264:13:2,2:4,1:6,4,1,2	2985_T1
chr1	16227787	.	GA	G	.	PASS	AS_FilterStatus=SITE;AS_SB_TABLE=5,16|5,6;DP=36;ECNT=1;GERMQ=47;MBQ=33,34;MFRL=396,436;MMQ=60,60;MPOS=48;NALOD=1.27;NLOD=5.03;POPAF=6.00;RPA=17,16;RU=A;STR;STRQ=15;TLOD=21.38;ANN=G|downstream_gene_variant|MODIFIER|Stau2|ENSMUSG00000025920|transcript|ENSMUST00000054668|protein_coding||c.*1985delT|||||1013|,G|intergenic_region|MODIFIER|Rdh10-Stau2|ENSMUSG00000025921-ENSMUSG00000025920|intergenic_re…	GT:AD:AF:DP:F1R2:F2R1:SB	0/0:17,0:0.051:17:6,0:8,0:3,14,0,0	0/1:4,11:0.744:15:1,8:3,3:2,2,5,6	3147_T1
chr1	16249234	.	CA	C	.	PASS	AS_FilterStatus=SITE;AS_SB_TABLE=23,30|3,1;DP=62;ECNT=1;GERMQ=93;MBQ=35,33;MFRL=449,433;MMQ=60,60;MPOS=45;NALOD=1.48;NLOD=8.41;POPAF=6.00;RPA=7,6;RU=A;STR;STRQ=93;TLOD=6.58;ANN=C|upstream_gene_variant|MODIFIER|Gm7568|ENSMUSG00000089982|transcript|ENSMUST00000160446|antisense||n.-4357delA|||||4357|,C|intron_variant|MODIFIER|Stau2|ENSMUSG00000025920|transcript|ENSMUST00000054668|protein_coding|13/1…	GT:AD:AF:DP:F1R2:F2R1:SB	0/0:28,0:0.032:28:10,0:16,0:13,15,0,0	0/1:25,4:0.159:29:8,2:16,2:10,15,3,1	3147_T1
chr1	16328089	.	CAA	C	.	PASS	AS_FilterStatus=SITE;AS_SB_TABLE=7,11|3,2;DP=39;ECNT=1;GERMQ=31;MBQ=33,34;MFRL=438,408;MMQ=60,60;MPOS=38;NALOD=0.925;NLOD=3.66;POPAF=6.00;RPA=26,24;RU=A;STR;STRQ=93;TLOD=11.37;ANN=C|intron_variant|MODIFIER|Stau2|ENSMUSG00000025920|transcript|ENSMUST00000054668|protein_coding|13/14|c.1530+17613_1530+17614delTT||||||	GT:AD:AF:DP:F1R2:F2R1:SB	0/0:13,0:0.061:13:7,0:1,0:5,8,0,0	0/1:5,5:0.504:10:2,2:1,2:2,3,3,2	2985_T1
chr1	16382587	.	A	T	.	PASS	AS_FilterStatus=SITE;AS_SB_TABLE=33,0|3,0;DP=40;ECNT=1;GERMQ=74;MBQ=35,35;MFRL=457,477;MMQ=40,37;MPOS=21;NALOD=1.36;NLOD=6.02;POPAF=6.00;TLOD=7.66;ANN=T|intron_variant|MODIFIER|Stau2|ENSMUSG00000025920|transcript|ENSMUST00000054668|protein_coding|9/14|c.891+7234T>A||||||	GT:AD:AF:DP:F1R2:F2R1:SB	0/0:20,0:0.043:20:12,0:8,0:20,0,0,0	0/1:13,3:0.221:16:8,2:5,1:13,0,3,0	613_T1
chr1	16442854	.	AT	A	.	PASS	AS_FilterStatus=SITE;AS_SB_TABLE=43,32|2,2;DP=87;ECNT=1;GERMQ=93;MBQ=34,33;MFRL=432,396;MMQ=60,60;MPOS=17;NALOD=1.66;NLOD=12.90;POPAF=6.00;RPA=7,6;RU=T;STR;STRQ=93;TLOD=6.11;ANN=A|intron_variant|MODIFIER|Stau2|ENSMUSG00000025920|transcript|ENSMUST00000054668|protein_coding|5/14|c.275-2397delA||||||	GT:AD:AF:DP:F1R2:F2R1:SB	0/0:43,0:0.022:43:26,0:17,0:22,21,0,0	0/1:32,4:0.130:36:14,2:18,2:21,11,2,2	2985_T1
chr1	16445442	.	AG	A	.	PASS	AS_FilterStatus=SITE;AS_SB_TABLE=18,20|4,3;DP=50;ECNT=1;GERMQ=71;MBQ=35,34;MFRL=424,377;MMQ=60,60;MPOS=31;NALOD=1.42;NLOD=6.30;POPAF=6.00;RPA=6,5;RU=G;STR;STRQ=93;TLOD=15.33;ANN=A|intron_variant|MODIFIER|Stau2|ENSMUSG00000025920|transcript|ENSMUST00000054668|protein_coding|5/14|c.275-4985delC||||||	GT:AD:AF:DP:F1R2:F2R1:SB	0/0:21,0:0.038:21:9,0:12,0:11,10,0,0	0/1:17,7:0.307:24:8,3:9,4:7,10,4,3	2985_T1
chr1	16451915	.	G	T	.	PASS	AS_FilterStatus=SITE;AS_SB_TABLE=22,37|8,4;DP=71;ECNT=1;GERMQ=93;MBQ=33,35;MFRL=432,497;MMQ=60,60;MPOS=40;NALOD=1.50;NLOD=9.19;POPAF=6.00;TLOD=36.16;ANN=T|intron_variant|MODIFIER|Stau2|ENSMUSG00000025920|transcript|ENSMUST00000054668|protein_coding|5/14|c.274+11120C>A||||||	GT:AD:AF:DP:F1R2:F2R1:SB	0/0:31,0:0.030:31:19,0:9,0:12,19,0,0	0/1:28,12:0.309:40:18,9:10,3:10,18,8,4	2985_T1
chr1	16468096	.	GT	G	.	PASS	AS_FilterStatus=SITE;AS_SB_TABLE=43,31|3,1;DP=80;ECNT=1;GERMQ=93;MBQ=35,36;MFRL=451,439;MMQ=60,60;MPOS=40;NALOD=1.62;NLOD=12.03;POPAF=6.00;RPA=6,5;RU=T;STR;STRQ=93;TLOD=6.21;ANN=G|intron_variant|MODIFIER|Stau2|ENSMUSG00000025920|transcript|ENSMUST00000054668|protein_coding|4/14|c.115-4903delA||||||	GT:AD:AF:DP:F1R2:F2R1:SB	0/0:40,0:0.024:40:24,0:12,0:25,15,0,0	0/1:34,4:0.124:38:12,2:17,2:18,16,3,1	613_T1
chr1	16590647	.	AT	A	.	PASS	AS_FilterStatus=SITE;AS_SB_TABLE=27,33|3,1;DP=69;ECNT=1;GERMQ=93;MBQ=34,34;MFRL=470,500;MMQ=60,58;MPOS=25;NALOD=1.43;NLOD=7.50;POPAF=6.00;RPA=7,6;RU=T;STR;STRQ=93;TLOD=5.93;ANN=A|intron_variant|MODIFIER|Ube2w|ENSMUSG00000025939|transcript|ENSMUST00000117146|protein_coding|3/5|c.298-5217delA||||||	GT:AD:AF:DP:F1R2:F2R1:SB	0/0:25,0:0.036:25:9,0:12,0:15,10,0,0	0/1:35,4:0.121:39:16,1:16,3:12,23,3,1	613_T1
chr1	16645562	.	ACTCT	A	.	PASS	AS_FilterStatus=SITE;AS_SB_TABLE=8,16|0,4;DP=43;ECNT=1;GERMQ=43;MBQ=34,23;MFRL=422,482;MMQ=60,60;MPOS=30;NALOD=0.995;NLOD=3.85;POPAF=6.00;RPA=21,19;RU=CT;STR;STRQ=93;TLOD=9.25;ANN=A|intron_variant|MODIFIER|Tceb1|ENSMUSG00000079658|transcript|ENSMUST00000115352|protein_coding|3/3|c.148+120_148+123delAGAG||||||	GT:AD:AF:DP:F1R2:F2R1:SB	0/0:13,0:0.054:13:3,0:7,0:3,10,0,0	0/1:11,4:0.292:15:3,1:4,2:5,6,0,4	613_T1
chr1	16685612	.	AT	A	.	PASS	AS_FilterStatus=SITE;AS_SB_TABLE=28,23|12,7;DP=77;ECNT=1;GERMQ=91;MBQ=34,34;MFRL=447,411;MMQ=60,60;MPOS=34;NALOD=1.29;NLOD=9.89;POPAF=6.00;RPA=12,11;RU=T;STR;STRQ=29;TLOD=35.51;ANN=A|upstream_gene_variant|MODIFIER|Ly96|ENSMUSG00000025779|transcript|ENSMUST00000026881|protein_coding||c.-2895delT|||||2843|,A|intergenic_region|MODIFIER|Tmem70-Ly96|ENSMUSG00000025940-ENSMUSG00000025779|intergenic_reg…	GT:AD:AF:DP:F1R2:F2R1:SB	0/0:33,0:0.026:33:16,0:14,0:18,15,0,0	0/1:18,19:0.509:37:8,8:10,10:10,8,12,7	613_T1
chr1	16766292	.	G	A	.	PASS	AS_FilterStatus=SITE;AS_SB_TABLE=21,40|1,2;DP=67;ECNT=1;GERMQ=93;MBQ=33,34;MFRL=446,397;MMQ=60,60;MPOS=37;NALOD=1.29;NLOD=10.53;POPAF=6.00;TLOD=6.83;ANN=A|downstream_gene_variant|MODIFIER|Gm5828|ENSMUSG00000091020|transcript|ENSMUST00000071842|protein_coding||c.*1978C>T|||||1978|WARNING_TRANSCRIPT_NO_STOP_CODON,A|intergenic_region|MODIFIER|Ly96-Gm5828|ENSMUSG00000025779-ENSMUSG00000091020|interge…	GT:AD:AF:DP:F1R2:F2R1:SB	0/0:35,0:0.026:35:15,0:20,0:14,21,0,0	0/1:26,3:0.128:29:12,1:14,2:7,19,1,2	2985_T1
chr1	16779850	.	GAA	G	.	PASS	AS_FilterStatus=SITE;AS_SB_TABLE=26,22|2,1;DP=57;ECNT=1;GERMQ=93;MBQ=34,36;MFRL=415,525;MMQ=60,60;MPOS=17;NALOD=1.16;NLOD=7.21;POPAF=6.00;RPA=12,10;RU=A;STR;STRQ=93;TLOD=6.38;ANN=G|intergenic_region|MODIFIER|Gm5828-Jph1|ENSMUSG00000091020-ENSMUSG00000042686|intergenic_region|ENSMUSG00000091020-ENSMUSG00000042686|||n.16779851_16779852delAA||||||	GT:AD:AF:DP:F1R2:F2R1:SB	0/0:24,0:0.035:24:11,0:13,0:12,12,0,0	0/1:24,3:0.137:27:10,1:13,2:14,10,2,1	3147_T1
chr1	16818931	.	T	C	.	PASS	AS_FilterStatus=SITE;AS_SB_TABLE=26,38|4,1;DP=70;ECNT=1;GERMQ=93;MBQ=34,34;MFRL=455,404;MMQ=60,60;MPOS=33;NALOD=1.56;NLOD=10.53;POPAF=6.00;TLOD=12.30;ANN=C|intergenic_region|MODIFIER|Gm5828-Jph1|ENSMUSG00000091020-ENSMUSG00000042686|intergenic_region|ENSMUSG00000091020-ENSMUSG00000042686|||n.16818931T>C||||||	GT:AD:AF:DP:F1R2:F2R1:SB	0/0:35,0:0.027:35:15,0:20,0:14,21,0,0	0/1:29,5:0.167:34:14,3:15,2:12,17,4,1	2985_T1
chr1	16856338	.	CTT	C	.	PASS	AS_FilterStatus=SITE;AS_SB_TABLE=16,20|4,4;DP=51;ECNT=1;GERMQ=60;MBQ=35,35;MFRL=488,528;MMQ=60,60;MPOS=30;NALOD=1.34;NLOD=5.70;POPAF=6.00;RPA=11,9;RU=T;STR;STRQ=93;TLOD=23.38;ANN=C|intergenic_region|MODIFIER|Gm5828-Jph1|ENSMUSG00000091020-ENSMUSG00000042686|intergenic_region|ENSMUSG00000091020-ENSMUSG00000042686|||n.16856339_16856340delTT||||||	GT:AD:AF:DP:F1R2:F2R1:SB	0/0:19,0:0.044:19:5,0:12,0:6,13,0,0	0/1:17,8:0.332:25:5,5:10,2:10,7,4,4	613_T1
chr1	16877118	.	TG	T	.	PASS	AS_FilterStatus=SITE;AS_SB_TABLE=16,22|3,1;DP=46;ECNT=1;GERMQ=86;MBQ=34,35;MFRL=431,431;MMQ=60,60;MPOS=49;NALOD=1.46;NLOD=8.11;POPAF=6.00;RPA=7,6;RU=G;STR;STRQ=93;TLOD=8.07;ANN=T|intergenic_region|MODIFIER|Gm5828-Jph1|ENSMUSG00000091020-ENSMUSG00000042686|intergenic_region|ENSMUSG00000091020-ENSMUSG00000042686|||n.16877119delG||||||	GT:AD:AF:DP:F1R2:F2R1:SB	0/0:27,0:0.034:27:15,0:11,0:12,15,0,0	0/1:11,4:0.292:15:5,3:6,0:4,7,3,1	3147_T1
chr1	16935494	.	C	T	.	PASS	AS_FilterStatus=SITE;AS_SB_TABLE=43,32|4,4;DP=83;ECNT=1;GERMQ=93;MBQ=34,34;MFRL=449,396;MMQ=60,60;MPOS=29;NALOD=1.65;NLOD=13.19;POPAF=6.00;TLOD=21.45;ANN=T|intergenic_region|MODIFIER|Gm5828-Jph1|ENSMUSG00000091020-ENSMUSG00000042686|intergenic_region|ENSMUSG00000091020-ENSMUSG00000042686|||n.16935494C>T||||||	GT:AD:AF:DP:F1R2:F2R1:SB	0/0:45,0:0.022:45:29,0:13,0:23,22,0,0	0/1:30,8:0.226:38:16,4:13,4:20,10,4,4	2985_T1
chr1	16937164	.	AG	A	.	PASS	AS_FilterStatus=SITE;AS_SB_TABLE=19,36|1,4;DP=63;ECNT=1;GERMQ=93;MBQ=36,36;MFRL=430,504;MMQ=60,60;MPOS=20;NALOD=1.56;NLOD=10.53;POPAF=6.00;RPA=6,5;RU=G;STR;STRQ=93;TLOD=9.80;ANN=A|intergenic_region|MODIFIER|Gm5828-Jph1|ENSMUSG00000091020-ENSMUSG00000042686|intergenic_region|ENSMUSG00000091020-ENSMUSG00000042686|||n.16937165delG||||||	GT:AD:AF:DP:F1R2:F2R1:SB	0/0:35,0:0.027:35:20,0:14,0:9,26,0,0	0/1:20,5:0.229:25:10,4:10,1:10,10,1,4	2985_T1
chr1	16953797	.	T	C	.	PASS	AS_FilterStatus=SITE;AS_SB_TABLE=31,4|3,1;DP=40;ECNT=1;GERMQ=72;MBQ=36,33;MFRL=426,237;MMQ=40,60;MPOS=5;NALOD=1.37;NLOD=6.62;POPAF=6.00;TLOD=8.03;ANN=C|intergenic_region|MODIFIER|Gm5828-Jph1|ENSMUSG00000091020-ENSMUSG00000042686|intergenic_region|ENSMUSG00000091020-ENSMUSG00000042686|||n.16953797T>C||||||	GT:AD:AF:DP:F1R2:F2R1:SB	0/0:22,0:0.041:22:11,0:11,0:21,1,0,0	0/1:13,4:0.266:17:6,1:6,2:10,3,3,1	3147_T1
chr1	17005727	.	C	T	.	PASS	AS_FilterStatus=SITE;AS_SB_TABLE=26,33|2,6;DP=70;ECNT=1;GERMQ=93;MBQ=36,34;MFRL=464,503;MMQ=60,60;MPOS=21;NALOD=1.57;NLOD=10.44;POPAF=6.00;TLOD=21.72;ANN=T|intron_variant|MODIFIER|Jph1|ENSMUSG00000042686|transcript|ENSMUST00000038382|protein_coding|3/4|c.1259-1193G>A||||||	GT:AD:AF:DP:F1R2:F2R1:SB	0/0:36,0:0.026:36:16,0:18,0:15,21,0,0	0/1:23,8:0.274:31:8,2:14,6:11,12,2,6	613_T1
chr1	17072506	.	G	T	.	PASS	AS_FilterStatus=SITE;AS_SB_TABLE=22,23|2,3;DP=52;ECNT=1;GERMQ=90;MBQ=35,34;MFRL=433,476;MMQ=60,60;MPOS=30;NALOD=1.37;NLOD=6.62;POPAF=6.00;TLOD=13.12;ANN=T|intron_variant|MODIFIER|Jph1|ENSMUSG00000042686|transcript|ENSMUST00000038382|protein_coding|2/4|c.1139+18792C>A||||||	GT:AD:AF:DP:F1R2:F2R1:SB	0/0:22,0:0.041:22:12,0:9,0:11,11,0,0	0/1:23,5:0.200:28:10,4:12,1:11,12,2,3	2985_T1
chr1	17096359	.	GAA	G	.	PASS	AS_FilterStatus=SITE;AS_SB_TABLE=25,17|4,1;DP=57;ECNT=1;GERMQ=90;MBQ=35,36;MFRL=439,442;MMQ=60,60;MPOS=26;NALOD=1.18;NLOD=7.52;POPAF=6.00;RPA=13,11;RU=A;STR;STRQ=93;TLOD=7.90;ANN=G|intron_variant|MODIFIER|Jph1|ENSMUSG00000042686|transcript|ENSMUST00000038382|protein_coding|1/4|c.379+865_379+866delTT||||||	GT:AD:AF:DP:F1R2:F2R1:SB	0/0:25,0:0.034:25:9,0:13,0:15,10,0,0	0/1:17,5:0.214:22:7,2:9,3:10,7,4,1	613_T1
chr1	17117052	.	G	C	.	PASS	AS_FilterStatus=SITE;AS_SB_TABLE=24,30|4,5;DP=66;ECNT=1;GERMQ=93;MBQ=33,35;MFRL=419,392;MMQ=60,60;MPOS=45;NALOD=1.37;NLOD=6.57;POPAF=6.00;TLOD=24.49;ANN=C|intergenic_region|MODIFIER|Jph1-Gdap1|ENSMUSG00000042686-ENSMUSG00000025777|intergenic_region|ENSMUSG00000042686-ENSMUSG00000025777|||n.17117052G>C||||||	GT:AD:AF:DP:F1R2:F2R1:SB	0/0:22,0:0.041:22:13,0:8,0:13,9,0,0	0/1:32,9:0.245:41:13,6:17,3:11,21,4,5	2985_T1
chr1	17143559	.	C	T	.	PASS	AS_FilterStatus=SITE;AS_SB_TABLE=25,23|2,2;DP=52;ECNT=1;GERMQ=93;MBQ=34,36;MFRL=467,482;MMQ=60,60;MPOS=21;NALOD=1.34;NLOD=6.32;POPAF=6.00;TLOD=8.81;ANN=T|upstream_gene_variant|MODIFIER|Gdap1|ENSMUSG00000025777|transcript|ENSMUST00000026879|protein_coding||c.-1913C>T|||||1803|,T|intergenic_region|MODIFIER|Jph1-Gdap1|ENSMUSG00000042686-ENSMUSG00000025777|intergenic_region|ENSMUSG00000042686-ENSMUSG…	GT:AD:AF:DP:F1R2:F2R1:SB	0/0:21,0:0.043:21:7,0:13,0:8,13,0,0	0/1:27,4:0.152:31:9,2:15,2:17,10,2,2	613_T1
chr1	17244747	.	G	T	.	PASS	AS_FilterStatus=SITE;AS_SB_TABLE=10,23|1,6;DP=41;ECNT=1;GERMQ=63;MBQ=33,33;MFRL=414,417;MMQ=60,60;MPOS=42;NALOD=1.38;NLOD=6.92;POPAF=6.00;TLOD=21.34;ANN=T|intergenic_region|MODIFIER|Gdap1-Gm25166|ENSMUSG00000025777-ENSMUSG00000089534|intergenic_region|ENSMUSG00000025777-ENSMUSG00000089534|||n.17244747G>T||||||	GT:AD:AF:DP:F1R2:F2R1:SB	0/0:23,0:0.040:23:11,0:12,0:7,16,0,0	0/1:10,7:0.444:17:5,4:5,3:3,7,1,6	2985_T1
chr1	17323990	.	AT	A	.	PASS	AS_FilterStatus=SITE;AS_SB_TABLE=26,37|1,3;DP=73;ECNT=1;GERMQ=93;MBQ=34,35;MFRL=477,504;MMQ=60,60;MPOS=26;NALOD=1.65;NLOD=12.32;POPAF=6.00;RPA=5,4;RU=T;STR;STRQ=93;TLOD=7.53;ANN=A|intergenic_region|MODIFIER|Gdap1-Gm25166|ENSMUSG00000025777-ENSMUSG00000089534|intergenic_region|ENSMUSG00000025777-ENSMUSG00000089534|||n.17323991delT||||||	GT:AD:AF:DP:F1R2:F2R1:SB	0/0:41,0:0.022:41:31,0:10,0:17,24,0,0	0/1:22,4:0.177:26:11,1:11,3:9,13,1,3	613_T1
chr1	17349402	.	AAAT	A	.	PASS	AS_FilterStatus=SITE;AS_SB_TABLE=11,21|9,5;DP=61;ECNT=1;GERMQ=44;MBQ=35,33;MFRL=403,401;MMQ=60,60;MPOS=33;NALOD=1.37;NLOD=6.00;POPAF=6.00;RPA=14,13;RU=AAT;STR;STRQ=4;TLOD=47.09;ANN=A|intergenic_region|MODIFIER|Gdap1-Gm25166|ENSMUSG00000025777-ENSMUSG00000089534|intergenic_region|ENSMUSG00000025777-ENSMUSG00000089534|||n.17349403_17349405delAAT||||||	GT:AD:AF:DP:F1R2:F2R1:SB	0/0:20,0:0.042:20:10,0:10,0:9,11,0,0	0/1:12,14:0.537:26:5,6:6,8:2,10,9,5	2985_T1
chr1	17350535	.	AT	A	.	PASS	AS_FilterStatus=SITE;AS_SB_TABLE=29,31|2,2;DP=67;ECNT=1;GERMQ=93;MBQ=34,34;MFRL=431,424;MMQ=60,60;MPOS=27;NALOD=1.58;NLOD=10.82;POPAF=6.00;RPA=6,5;RU=T;STR;STRQ=93;TLOD=7.01;ANN=A|intergenic_region|MODIFIER|Gdap1-Gm25166|ENSMUSG00000025777-ENSMUSG00000089534|intergenic_region|ENSMUSG00000025777-ENSMUSG00000089534|||n.17350536delT||||||	GT:AD:AF:DP:F1R2:F2R1:SB	0/0:37,0:0.026:37:19,0:17,0:22,15,0,0	0/1:23,4:0.178:27:9,0:13,4:7,16,2,2	2985_T1
chr1	17369204	.	CA	C	.	PASS	AS_FilterStatus=SITE;AS_SB_TABLE=41,25|2,6;DP=76;ECNT=1;GERMQ=93;MBQ=33,36;MFRL=427,398;MMQ=60,60;MPOS=33;NALOD=1.57;NLOD=10.83;POPAF=6.00;RPA=4,3;RU=A;STR;STRQ=93;TLOD=18.39;ANN=C|intergenic_region|MODIFIER|Gdap1-Gm25166|ENSMUSG00000025777-ENSMUSG00000089534|intergenic_region|ENSMUSG00000025777-ENSMUSG00000089534|||n.17369205delA||||||	GT:AD:AF:DP:F1R2:F2R1:SB	0/0:37,0:0.026:37:17,0:20,0:25,12,0,0	0/1:29,8:0.230:37:9,5:20,3:16,13,2,6	613_T1
chr1	17383293	.	GTT	G	.	PASS	AS_FilterStatus=SITE;AS_SB_TABLE=10,9|3,0;DP=30;ECNT=1;GERMQ=35;MBQ=29,36;MFRL=419,367;MMQ=60,60;MPOS=24;NALOD=1.17;NLOD=3.27;POPAF=6.00;RPA=15,13;RU=T;STR;STRQ=93;TLOD=7.39;ANN=G|intergenic_region|MODIFIER|Gdap1-Gm25166|ENSMUSG00000025777-ENSMUSG00000089534|intergenic_region|ENSMUSG00000025777-ENSMUSG00000089534|||n.17383294_17383295delTT||||||	GT:AD:AF:DP:F1R2:F2R1:SB	0/0:11,0:0.066:11:3,0:3,0:4,7,0,0	0/1:8,3:0.306:11:3,1:2,2:6,2,3,0	3147_T1
chr1	17427737	.	G	T	.	PASS	AS_FilterStatus=SITE;AS_SB_TABLE=36,23|2,5;DP=66;ECNT=2;GERMQ=93;MBQ=34,34;MFRL=419,412;MMQ=60,60;MPOS=51;NALOD=1.48;NLOD=8.73;POPAF=6.00;TLOD=17.48;ANN=T|intergenic_region|MODIFIER|Gdap1-Gm25166|ENSMUSG00000025777-ENSMUSG00000089534|intergenic_region|ENSMUSG00000025777-ENSMUSG00000089534|||n.17427737G>T||||||	GT:AD:AF:DP:F1R2:F2R1:SB	0/0:29,0:0.032:29:14,0:15,0:17,12,0,0	0/1:30,7:0.212:37:17,5:11,2:19,11,2,5	2985_T1
chr1	17452593	.	A	G	.	PASS	AS_FilterStatus=SITE;AS_SB_TABLE=24,32|3,1;DP=63;ECNT=1;GERMQ=93;MBQ=35,36;MFRL=448,359;MMQ=60,60;MPOS=39;NALOD=1.36;NLOD=6.32;POPAF=6.00;TLOD=9.96;ANN=G|intergenic_region|MODIFIER|Gdap1-Gm25166|ENSMUSG00000025777-ENSMUSG00000089534|intergenic_region|ENSMUSG00000025777-ENSMUSG00000089534|||n.17452593A>G||||||	GT:AD:AF:DP:F1R2:F2R1:SB	0/0:21,0:0.042:21:11,0:10,0:8,13,0,0	0/1:35,4:0.125:39:23,1:11,3:16,19,3,1	613_T1
chr1	17482415	.	C	A	.	PASS	AS_FilterStatus=SITE;AS_SB_TABLE=24,25|1,6;DP=57;ECNT=1;GERMQ=93;MBQ=34,35;MFRL=457,406;MMQ=60,60;MPOS=52;NALOD=1.45;NLOD=8.13;POPAF=6.00;TLOD=20.06;ANN=A|intergenic_region|MODIFIER|Gdap1-Gm25166|ENSMUSG00000025777-ENSMUSG00000089534|intergenic_region|ENSMUSG00000025777-ENSMUSG00000089534|||n.17482415C>A||||||	GT:AD:AF:DP:F1R2:F2R1:SB	0/0:27,0:0.034:27:12,0:15,0:15,12,0,0	0/1:22,7:0.258:29:14,3:8,4:9,13,1,6	2985_T1
chr1	17527984	.	CT	C	.	PASS	AS_FilterStatus=SITE;AS_SB_TABLE=24,13|7,5;DP=54;ECNT=1;GERMQ=77;MBQ=33,33;MFRL=440,453;MMQ=60,60;MPOS=36;NALOD=1.49;NLOD=8.39;POPAF=6.00;RPA=13,12;RU=T;STR;STRQ=5;TLOD=23.48;ANN=C|intergenic_region|MODIFIER|Gm25166-Pi15|ENSMUSG00000089534-ENSMUSG00000067780|intergenic_region|ENSMUSG00000089534-ENSMUSG00000067780|||n.17527985delT||||||	GT:AD:AF:DP:F1R2:F2R1:SB	0/0:28,0:0.031:28:10,0:15,0:16,12,0,0	0/1:9,12:0.563:21:2,5:7,6:8,1,7,5	613_T1
chr1	17543792	.	G	T	.	PASS	AS_FilterStatus=SITE;AS_SB_TABLE=26,25|2,2;DP=55;ECNT=1;GERMQ=93;MBQ=35,35;MFRL=468,395;MMQ=60,60;MPOS=58;NALOD=1.38;NLOD=6.92;POPAF=6.00;TLOD=7.16;ANN=T|intergenic_region|MODIFIER|Gm25166-Pi15|ENSMUSG00000089534-ENSMUSG00000067780|intergenic_region|ENSMUSG00000089534-ENSMUSG00000067780|||n.17543792G>T||||||	GT:AD:AF:DP:F1R2:F2R1:SB	0/0:23,0:0.040:23:11,0:11,0:8,15,0,0	0/1:28,4:0.134:32:12,1:15,2:18,10,2,2	613_T1
chr1	17554197	.	G	T	.	PASS	AS_FilterStatus=SITE;AS_SB_TABLE=34,32|1,5;DP=75;ECNT=1;GERMQ=93;MBQ=34,35;MFRL=439,507;MMQ=60,60;MPOS=32;NALOD=1.55;NLOD=10.19;POPAF=6.00;TLOD=14.42;ANN=T|intergenic_region|MODIFIER|Gm25166-Pi15|ENSMUSG00000089534-ENSMUSG00000067780|intergenic_region|ENSMUSG00000089534-ENSMUSG00000067780|||n.17554197G>T||||||	GT:AD:AF:DP:F1R2:F2R1:SB	0/0:34,0:0.028:34:14,0:19,0:16,18,0,0	0/1:32,6:0.174:38:11,3:21,3:18,14,1,5	613_T1
chr1	17573459	.	A	C	.	PASS	AS_FilterStatus=SITE;AS_SB_TABLE=30,20|3,5;DP=58;ECNT=1;GERMQ=87;MBQ=34,35;MFRL=438,411;MMQ=60,60;MPOS=50;NALOD=1.32;NLOD=6.02;POPAF=6.00;TLOD=19.17;ANN=C|intergenic_region|MODIFIER|Gm25166-Pi15|ENSMUSG00000089534-ENSMUSG00000067780|intergenic_region|ENSMUSG00000089534-ENSMUSG00000067780|||n.17573459A>C||||||	GT:AD:AF:DP:F1R2:F2R1:SB	0/0:20,0:0.045:20:13,0:7,0:14,6,0,0	0/1:30,8:0.218:38:14,3:15,4:16,14,3,5	613_T1
chr1	17600348	.	G	A	.	PASS	AS_FilterStatus=SITE;AS_SB_TABLE=26,26|6,2;DP=61;ECNT=1;GERMQ=93;MBQ=33,34;MFRL=476,436;MMQ=60,60;MPOS=26;NALOD=1.53;NLOD=9.89;POPAF=6.00;TLOD=22.82;ANN=A|upstream_gene_variant|MODIFIER|Pi15|ENSMUSG00000067780|transcript|ENSMUST00000088476|protein_coding||c.-1697G>A|||||1553|,A|intergenic_region|MODIFIER|Gm25166-Pi15|ENSMUSG00000089534-ENSMUSG00000067780|intergenic_region|ENSMUSG00000089534-ENSMU…	GT:AD:AF:DP:F1R2:F2R1:SB	0/0:33,0:0.029:33:17,0:15,0:15,18,0,0	0/1:19,8:0.310:27:10,6:9,2:11,8,6,2	3147_T1
chr1	17619580	.	A	AT	.	PASS	AS_FilterStatus=SITE;AS_SB_TABLE=28,33|3,4;DP=72;ECNT=1;GERMQ=93;MBQ=34,35;MFRL=457,403;MMQ=60,60;MPOS=45;NALOD=1.46;NLOD=7.53;POPAF=6.00;RPA=7,8;RU=T;STR;STRQ=93;TLOD=12.23;ANN=AT|intron_variant|MODIFIER|Pi15|ENSMUSG00000067780|transcript|ENSMUST00000088476|protein_coding|2/5|c.307-196dupT||||||INFO_REALIGN_3_PRIME	GT:AD:AF:DP:F1R2:F2R1:SB	0/0:25,0:0.034:25:16,0:8,0:11,14,0,0	0/1:36,7:0.180:43:16,4:18,3:17,19,3,4	613_T1
chr1	17656719	.	GCACA	G	.	PASS	AS_FilterStatus=SITE;AS_SB_TABLE=14,19|4,0;DP=49;ECNT=1;GERMQ=70;MBQ=35,37;MFRL=409,451;MMQ=60,60;MPOS=40;NALOD=1.42;NLOD=6.56;POPAF=6.00;RPA=17,15;RU=CA;STR;STRQ=93;TLOD=13.59;ANN=G|intergenic_region|MODIFIER|Pi15-Gm16070|ENSMUSG00000067780-ENSMUSG00000085125|intergenic_region|ENSMUSG00000067780-ENSMUSG00000085125|||n.17656720_17656723delCACA||||||	GT:AD:AF:DP:F1R2:F2R1:SB	0/0:22,0:0.038:22:5,0:10,0:8,14,0,0	0/1:11,4:0.294:15:7,1:1,3:6,5,4,0	613_T1
chr1	17661698	.	T	TTCTC	.	PASS	AS_FilterStatus=SITE;AS_SB_TABLE=15,23|1,2;DP=42;ECNT=2;GERMQ=64;MBQ=34,34;MFRL=414,343;MMQ=60,60;MPOS=43;NALOD=1.06;NLOD=5.33;POPAF=6.00;RPA=16,18;RU=TC;STR;STRQ=93;TLOD=9.00;ANN=TTCTC|intergenic_region|MODIFIER|Pi15-Gm16070|ENSMUSG00000067780-ENSMUSG00000085125|intergenic_region|ENSMUSG00000067780-ENSMUSG00000085125|||n.17661698_17661699insTCTC||||||	GT:AD:AF:DP:F1R2:F2R1:PGT:PID:PS:SB	0|0:22,0:0.044:22:7,0:15,0:0|1:17661698_T_TTCTC:17661698:7,15,0,0	0|1:16,3:0.264:19:5,1:10,2:0|1:17661698_T_TTCTC:17661698:8,8,1,2	613_T1
chr1	17683366	.	CT	C	.	PASS	AS_FilterStatus=SITE;AS_SB_TABLE=20,27|3,3;DP=58;ECNT=1;GERMQ=93;MBQ=35,34;MFRL=474,427;MMQ=40,40;MPOS=36;NALOD=1.47;NLOD=8.11;POPAF=6.00;RPA=7,6;RU=T;STR;STRQ=93;TLOD=11.83;ANN=C|intragenic_variant|MODIFIER|Gm16070|ENSMUSG00000085125|gene_variant|ENSMUSG00000085125|||n.17683367delA||||||	GT:AD:AF:DP:F1R2:F2R1:SB	0/0:27,0:0.033:27:11,0:15,0:11,16,0,0	0/1:20,6:0.249:26:9,4:11,2:9,11,3,3	2985_T1
chr1	17692220	.	T	C	.	PASS	AS_FilterStatus=SITE;AS_SB_TABLE=42,27|1,3;DP=75;ECNT=1;GERMQ=93;MBQ=34,24;MFRL=407,344;MMQ=60,60;MPOS=50;NALOD=1.54;NLOD=9.93;POPAF=6.00;TLOD=5.98;ANN=C|downstream_gene_variant|MODIFIER|Gm16070|ENSMUSG00000085125|transcript|ENSMUST00000127328|lincRNA||n.*684A>G|||||684|,C|intragenic_variant|MODIFIER|Gm16070|ENSMUSG00000085125|gene_variant|ENSMUSG00000085125|||n.17692220A>G||||||	GT:AD:AF:DP:F1R2:F2R1:SB	0/0:33,0:0.028:33:14,0:19,0:18,15,0,0	0/1:36,4:0.100:40:14,3:22,1:24,12,1,3	2985_T1
chr1	17710500	.	ACC	A	.	PASS	AS_FilterStatus=SITE;AS_SB_TABLE=3,21|1,3;DP=41;ECNT=1;GERMQ=44;MBQ=35,35;MFRL=426,465;MMQ=60,60;MPOS=51;NALOD=1.24;NLOD=3.90;POPAF=6.00;RPA=12,10;RU=C;STR;STRQ=93;TLOD=8.35;ANN=A|intron_variant|MODIFIER|Gm16070|ENSMUSG00000085125|transcript|ENSMUST00000127328|lincRNA|2/4|n.694-607_694-606delGG||||||	GT:AD:AF:DP:F1R2:F2R1:SB	0/0:13,0:0.057:13:5,0:8,0:2,11,0,0	0/1:11,4:0.287:15:3,4:8,0:1,10,1,3	2985_T1
chr1	17855014	.	C	A	.	PASS	AS_FilterStatus=SITE;AS_SB_TABLE=34,32|2,1;DP=69;ECNT=1;GERMQ=93;MBQ=34,34;MFRL=429,458;MMQ=60,60;MPOS=74;NALOD=1.62;NLOD=12.29;POPAF=6.00;TLOD=6.76;ANN=A|intergenic_region|MODIFIER|Crispld1-Crisp4|ENSMUSG00000025776-ENSMUSG00000025774|intergenic_region|ENSMUSG00000025776-ENSMUSG00000025774|||n.17855014C>A||||||	GT:AD:AF:DP:F1R2:F2R1:SB	0/0:41,0:0.023:41:27,0:12,0:20,21,0,0	0/1:25,3:0.134:28:15,1:9,2:14,11,2,1	2985_T1
chr1	17924276	.	C	A	.	PASS	AS_FilterStatus=SITE;AS_SB_TABLE=44,31|6,2;DP=86;ECNT=1;GERMQ=93;MBQ=34,35;MFRL=442,532;MMQ=60,60;MPOS=39;NALOD=1.64;NLOD=12.60;POPAF=6.00;TLOD=16.70;ANN=A|intergenic_region|MODIFIER|Crispld1-Crisp4|ENSMUSG00000025776-ENSMUSG00000025774|intergenic_region|ENSMUSG00000025776-ENSMUSG00000025774|||n.17924276C>A||||||	GT:AD:AF:DP:F1R2:F2R1:SB	0/0:43,0:0.022:43:19,0:23,0:26,17,0,0	0/1:32,8:0.200:40:17,0:14,6:18,14,6,2	613_T1
chr1	17930780	.	G	A	.	PASS	AS_FilterStatus=SITE;AS_SB_TABLE=30,28|4,2;DP=66;ECNT=1;GERMQ=93;MBQ=34,34;MFRL=414,370;MMQ=60,60;MPOS=58;NALOD=1.58;NLOD=10.53;POPAF=6.00;TLOD=14.26;ANN=A|intergenic_region|MODIFIER|Crispld1-Crisp4|ENSMUSG00000025776-ENSMUSG00000025774|intergenic_region|ENSMUSG00000025776-ENSMUSG00000025774|||n.17930780G>A||||||	GT:AD:AF:DP:F1R2:F2R1:SB	0/0:36,0:0.026:36:9,0:26,0:18,18,0,0	0/1:22,6:0.207:28:11,3:10,3:12,10,4,2	2985_T1
chr1	17949365	.	T	A	.	PASS	AS_FilterStatus=SITE;AS_SB_TABLE=42,43|3,1;DP=93;ECNT=1;GERMQ=93;MBQ=35,35;MFRL=456,404;MMQ=60,60;MPOS=22;NALOD=1.63;NLOD=12.29;POPAF=6.00;TLOD=9.07;ANN=A|intergenic_region|MODIFIER|Crispld1-Crisp4|ENSMUSG00000025776-ENSMUSG00000025774|intergenic_region|ENSMUSG00000025776-ENSMUSG00000025774|||n.17949365T>A||||||	GT:AD:AF:DP:F1R2:F2R1:SB	0/0:41,0:0.023:41:18,0:22,0:21,20,0,0	0/1:44,4:0.102:48:14,1:29,3:21,23,3,1	613_T1
chr1	17975942	.	C	T	.	PASS	AS_FilterStatus=SITE;AS_SB_TABLE=36,33|3,1;DP=73;ECNT=1;GERMQ=93;MBQ=33,35;MFRL=452,361;MMQ=60,60;MPOS=46;NALOD=1.54;NLOD=10.18;POPAF=6.00;TLOD=9.36;ANN=T|intergenic_region|MODIFIER|Crispld1-Crisp4|ENSMUSG00000025776-ENSMUSG00000025774|intergenic_region|ENSMUSG00000025776-ENSMUSG00000025774|||n.17975942C>T||||||	GT:AD:AF:DP:F1R2:F2R1:SB	0/0:34,0:0.028:34:19,0:13,0:16,18,0,0	0/1:35,4:0.125:39:14,2:20,2:20,15,3,1	613_T1
chr1	17984458	.	C	T	.	PASS	AS_FilterStatus=SITE;AS_SB_TABLE=30,35|4,2;DP=74;ECNT=1;GERMQ=93;MBQ=29,36;MFRL=425,512;MMQ=60,60;MPOS=39;NALOD=1.52;NLOD=9.63;POPAF=6.00;TLOD=16.24;ANN=T|intergenic_region|MODIFIER|Crispld1-Crisp4|ENSMUSG00000025776-ENSMUSG00000025774|intergenic_region|ENSMUSG00000025776-ENSMUSG00000025774|||n.17984458C>T||||||	GT:AD:AF:DP:F1R2:F2R1:SB	0/0:32,0:0.029:32:15,0:17,0:13,19,0,0	0/1:33,6:0.170:39:14,3:19,3:17,16,4,2	613_T1
chr1	18059787	.	C	A	.	PASS	AS_FilterStatus=SITE;AS_SB_TABLE=29,30|2,4;DP=66;ECNT=1;GERMQ=93;MBQ=34,35;MFRL=427,421;MMQ=60,60;MPOS=29;NALOD=1.62;NLOD=12.29;POPAF=6.00;TLOD=17.34;ANN=A|intergenic_region|MODIFIER|Crispld1-Crisp4|ENSMUSG00000025776-ENSMUSG00000025774|intergenic_region|ENSMUSG00000025776-ENSMUSG00000025774|||n.18059787C>A||||||	GT:AD:AF:DP:F1R2:F2R1:SB	0/0:42,0:0.023:42:18,0:23,0:23,19,0,0	0/1:17,6:0.293:23:8,4:8,2:6,11,2,4	2985_T1
chr1	18078065	.	T	C	.	PASS	AS_FilterStatus=SITE;AS_SB_TABLE=14,45|3,1;DP=63;ECNT=1;GERMQ=93;MBQ=35,28;MFRL=394,560;MMQ=60,60;MPOS=13;NALOD=1.46;NLOD=8.43;POPAF=6.00;TLOD=8.10;ANN=C|intergenic_region|MODIFIER|Crispld1-Crisp4|ENSMUSG00000025776-ENSMUSG00000025774|intergenic_region|ENSMUSG00000025776-ENSMUSG00000025774|||n.18078065T>C||||||	GT:AD:AF:DP:F1R2:F2R1:SB	0/0:29,0:0.033:29:16,0:11,0:7,22,0,0	0/1:30,4:0.134:34:7,3:22,0:7,23,3,1	2985_T1
chr1	18100280	.	TA	T	.	PASS	AS_FilterStatus=SITE;AS_SB_TABLE=20,26|2,2;DP=54;ECNT=1;GERMQ=93;MBQ=34,35;MFRL=448,496;MMQ=60,60;MPOS=58;NALOD=1.44;NLOD=7.51;POPAF=6.00;RPA=7,6;RU=A;STR;STRQ=93;TLOD=6.95;ANN=T|intergenic_region|MODIFIER|Crispld1-Crisp4|ENSMUSG00000025776-ENSMUSG00000025774|intergenic_region|ENSMUSG00000025776-ENSMUSG00000025774|||n.18100281delA||||||	GT:AD:AF:DP:F1R2:F2R1:SB	0/0:25,0:0.035:25:11,0:10,0:12,13,0,0	0/1:21,4:0.184:25:9,3:12,1:8,13,2,2	613_T1
chr1	18107443	.	AT	A	.	PASS	AS_FilterStatus=SITE;AS_SB_TABLE=35,33|1,3;DP=82;ECNT=1;GERMQ=93;MBQ=34,35;MFRL=468,406;MMQ=60,60;MPOS=40;NALOD=1.58;NLOD=9.91;POPAF=6.00;RPA=6,5;RU=T;STR;STRQ=93;TLOD=6.20;ANN=A|intergenic_region|MODIFIER|Crispld1-Crisp4|ENSMUSG00000025776-ENSMUSG00000025774|intergenic_region|ENSMUSG00000025776-ENSMUSG00000025774|||n.18107444delT||||||	GT:AD:AF:DP:F1R2:F2R1:SB	0/0:33,0:0.026:33:18,0:14,0:17,16,0,0	0/1:35,4:0.120:39:14,1:20,3:18,17,1,3	613_T1
chr1	18149384	.	C	T	.	PASS	AS_FilterStatus=SITE;AS_SB_TABLE=28,47|1,2;DP=82;ECNT=1;GERMQ=93;MBQ=35,35;MFRL=438,397;MMQ=60,60;MPOS=41;NALOD=1.63;NLOD=12.34;POPAF=6.00;TLOD=6.55;ANN=T|upstream_gene_variant|MODIFIER|Crisp4|ENSMUSG00000025774|transcript|ENSMUST00000115344|protein_coding||c.-3531G>A|||||3482|,T|intergenic_region|MODIFIER|Crisp4-Defb44-ps|ENSMUSG00000025774-ENSMUSG00000070977|intergenic_region|ENSMUSG00000025774…	GT:AD:AF:DP:F1R2:F2R1:SB	0/0:42,0:0.023:42:15,0:27,0:16,26,0,0	0/1:33,3:0.108:36:16,1:16,2:12,21,1,2	613_T1
chr1	18193120	.	G	A	.	PASS	AS_FilterStatus=SITE;AS_SB_TABLE=30,18|1,2;DP=51;ECNT=1;GERMQ=93;MBQ=36,35;MFRL=442,395;MMQ=40,40;MPOS=40;NALOD=1.54;NLOD=10.19;POPAF=6.00;TLOD=6.64;ANN=A|intergenic_region|MODIFIER|Crisp4-Defb44-ps|ENSMUSG00000025774-ENSMUSG00000070977|intergenic_region|ENSMUSG00000025774-ENSMUSG00000070977|||n.18193120G>A||||||	GT:AD:AF:DP:F1R2:F2R1:SB	0/0:34,0:0.028:34:14,0:18,0:20,14,0,0	0/1:14,3:0.210:17:7,1:7,2:10,4,1,2	2985_T1
chr1	18298613	.	C	T	.	PASS	AS_FilterStatus=SITE;AS_SB_TABLE=32,39|4,4;DP=81;ECNT=1;GERMQ=93;MBQ=35,36;MFRL=448,454;MMQ=60,60;MPOS=25;NALOD=1.53;NLOD=9.93;POPAF=6.00;TLOD=21.93;ANN=T|intergenic_region|MODIFIER|Defb41-Gm24075|ENSMUSG00000067773-ENSMUSG00000088800|intergenic_region|ENSMUSG00000067773-ENSMUSG00000088800|||n.18298613C>T||||||	GT:AD:AF:DP:F1R2:F2R1:SB	0/0:33,0:0.029:33:15,0:17,0:15,18,0,0	0/1:38,8:0.188:46:12,3:25,5:17,21,4,4	613_T1
chr1	18336604	.	A	G	.	PASS	AS_FilterStatus=SITE;AS_SB_TABLE=38,38|3,1;DP=84;ECNT=1;GERMQ=93;MBQ=34,35;MFRL=434,539;MMQ=60,60;MPOS=22;NALOD=1.57;NLOD=10.53;POPAF=6.00;TLOD=8.60;ANN=G|intergenic_region|MODIFIER|Defb41-Gm24075|ENSMUSG00000067773-ENSMUSG00000088800|intergenic_region|ENSMUSG00000067773-ENSMUSG00000088800|||n.18336604A>G||||||	GT:AD:AF:DP:F1R2:F2R1:SB	0/0:36,0:0.026:36:16,0:20,0:19,17,0,0	0/1:40,4:0.111:44:15,3:25,1:19,21,3,1	613_T1
chr1	18372568	.	A	G	.	PASS	AS_FilterStatus=SITE;AS_SB_TABLE=41,32|1,3;DP=78;ECNT=1;GERMQ=93;MBQ=34,34;MFRL=456,435;MMQ=60,60;MPOS=32;NALOD=1.61;NLOD=11.99;POPAF=6.00;TLOD=9.27;ANN=G|intergenic_region|MODIFIER|Defb41-Gm24075|ENSMUSG00000067773-ENSMUSG00000088800|intergenic_region|ENSMUSG00000067773-ENSMUSG00000088800|||n.18372568A>G||||||	GT:AD:AF:DP:F1R2:F2R1:SB	0/0:41,0:0.024:41:20,0:20,0:21,20,0,0	0/1:32,4:0.131:36:20,3:12,1:20,12,1,3	613_T1
chr1	18379309	.	AT	A	.	PASS	AS_FilterStatus=SITE;AS_SB_TABLE=18,21|2,3;DP=47;ECNT=1;GERMQ=83;MBQ=34,34;MFRL=464,429;MMQ=60,60;MPOS=53;NALOD=1.44;NLOD=7.82;POPAF=6.00;RPA=6,5;RU=T;STR;STRQ=93;TLOD=10.70;ANN=A|intergenic_region|MODIFIER|Defb41-Gm24075|ENSMUSG00000067773-ENSMUSG00000088800|intergenic_region|ENSMUSG00000067773-ENSMUSG00000088800|||n.18379310delT||||||	GT:AD:AF:DP:F1R2:F2R1:SB	0/0:26,0:0.035:26:10,0:15,0:10,16,0,0	0/1:13,5:0.299:18:4,1:9,4:8,5,2,3	3147_T1
chr1	18379937	.	TA	T	.	PASS	AS_FilterStatus=SITE;AS_SB_TABLE=37,27|5,7;DP=79;ECNT=1;GERMQ=93;MBQ=36,34;MFRL=425,464;MMQ=60,60;MPOS=17;NALOD=1.52;NLOD=9.32;POPAF=6.00;RPA=4,3;RU=A;STR;STRQ=93;TLOD=29.37;ANN=T|intergenic_region|MODIFIER|Defb41-Gm24075|ENSMUSG00000067773-ENSMUSG00000088800|intergenic_region|ENSMUSG00000067773-ENSMUSG00000088800|||n.18379938delA||||||	GT:AD:AF:DP:F1R2:F2R1:SB	0/0:31,0:0.029:31:11,0:19,0:18,13,0,0	0/1:33,12:0.282:45:18,7:14,5:19,14,5,7	613_T1
chr1	18414510	.	GAGAAGA	G	.	PASS	AS_FilterStatus=SITE;AS_SB_TABLE=11,12|2,3;DP=56;ECNT=1;GERMQ=34;MBQ=34,32;MFRL=458,349;MMQ=60,60;MPOS=39;NALOD=1.40;NLOD=4.65;POPAF=6.00;RPA=28,26;RU=AGA;STR;STRQ=93;TLOD=18.43;ANN=G|intergenic_region|MODIFIER|Defb41-Gm24075|ENSMUSG00000067773-ENSMUSG00000088800|intergenic_region|ENSMUSG00000067773-ENSMUSG00000088800|||n.18414511_18414516delAGAAGA||||||	GT:AD:AF:DP:F1R2:F2R1:SB	0/0:16,0:0.044:16:6,0:4,0:9,7,0,0	0/1:7,5:0.435:12:2,3:0,1:2,5,2,3	613_T1
chr1	18422907	.	A	AC	.	PASS	AS_FilterStatus=SITE;AS_SB_TABLE=31,24|3,1;DP=62;ECNT=1;GERMQ=93;MBQ=35,35;MFRL=442,455;MMQ=60,60;MPOS=68;NALOD=1.51;NLOD=9.02;POPAF=6.00;RPA=7,8;RU=C;STR;STRQ=93;TLOD=6.51;ANN=AC|intergenic_region|MODIFIER|Defb41-Gm24075|ENSMUSG00000067773-ENSMUSG00000088800|intergenic_region|ENSMUSG00000067773-ENSMUSG00000088800|||n.18422907_18422908insC||||||	GT:AD:AF:DP:F1R2:F2R1:SB	0/0:32,0:0.030:32:18,0:14,0:17,15,0,0	0/1:23,4:0.172:27:14,2:9,2:14,9,3,1	3147_T1
chr1	18453451	.	G	A	.	PASS	AS_FilterStatus=SITE;AS_SB_TABLE=26,24|4,2;DP=57;ECNT=1;GERMQ=93;MBQ=34,35;MFRL=426,478;MMQ=60,60;MPOS=59;NALOD=1.58;NLOD=11.09;POPAF=6.00;TLOD=17.34;ANN=A|intergenic_region|MODIFIER|Defb41-Gm24075|ENSMUSG00000067773-ENSMUSG00000088800|intergenic_region|ENSMUSG00000067773-ENSMUSG00000088800|||n.18453451G>A||||||	GT:AD:AF:DP:F1R2:F2R1:SB	0/0:37,0:0.026:37:18,0:18,0:19,18,0,0	0/1:13,6:0.335:19:6,3:6,3:7,6,4,2	2985_T1
chr1	18454712	.	TA	T	.	PASS	AS_FilterStatus=SITE;AS_SB_TABLE=34,23|5,2;DP=73;ECNT=1;GERMQ=93;MBQ=35,34;MFRL=404,405;MMQ=60,60;MPOS=47;NALOD=1.48;NLOD=8.42;POPAF=6.00;RPA=7,6;RU=A;STR;STRQ=93;TLOD=13.32;ANN=T|intergenic_region|MODIFIER|Defb41-Gm24075|ENSMUSG00000067773-ENSMUSG00000088800|intergenic_region|ENSMUSG00000067773-ENSMUSG00000088800|||n.18454713delA||||||	GT:AD:AF:DP:F1R2:F2R1:SB	0/0:28,0:0.032:28:11,0:17,0:16,12,0,0	0/1:29,7:0.210:36:17,6:12,1:18,11,5,2	2985_T1
chr1	18483995	.	G	T	.	PASS	AS_FilterStatus=SITE;AS_SB_TABLE=19,29|2,1;DP=51;ECNT=2;GERMQ=93;MBQ=33,36;MFRL=467,353;MMQ=60,60;MPOS=50;NALOD=1.41;NLOD=7.53;POPAF=6.00;TLOD=8.79;ANN=T|intergenic_region|MODIFIER|Defb41-Gm24075|ENSMUSG00000067773-ENSMUSG00000088800|intergenic_region|ENSMUSG00000067773-ENSMUSG00000088800|||n.18483995G>T||||||	GT:AD:AF:DP:F1R2:F2R1:SB	0/0:27,0:0.037:27:13,0:12,0:13,14,0,0	0/1:21,3:0.153:24:6,2:12,1:6,15,2,1	3147_T1
chr1	18530707	.	ATT	A	.	PASS	AS_FilterStatus=SITE;AS_SB_TABLE=24,18|3,3;DP=59;ECNT=1;GERMQ=87;MBQ=34,35;MFRL=446,562;MMQ=60,60;MPOS=61;NALOD=1.03;NLOD=7.82;POPAF=6.00;RPA=15,13;RU=T;STR;STRQ=93;TLOD=10.31;ANN=A|intergenic_region|MODIFIER|Defb41-Gm24075|ENSMUSG00000067773-ENSMUSG00000088800|intergenic_region|ENSMUSG00000067773-ENSMUSG00000088800|||n.18530708_18530709delTT||||||	GT:AD:AF:DP:F1R2:F2R1:SB	0/0:26,0:0.033:26:10,0:11,0:13,13,0,0	0/1:16,6:0.288:22:7,3:8,3:11,5,3,3	613_T1
chr1	18571743	.	TA	T	.	PASS	AS_FilterStatus=SITE;AS_SB_TABLE=25,44|4,3;DP=77;ECNT=1;GERMQ=93;MBQ=34,34;MFRL=446,528;MMQ=60,60;MPOS=35;NALOD=1.52;NLOD=9.62;POPAF=6.00;RPA=6,5;RU=A;STR;STRQ=93;TLOD=13.05;ANN=T|intergenic_region|MODIFIER|Defb41-Gm24075|ENSMUSG00000067773-ENSMUSG00000088800|intergenic_region|ENSMUSG00000067773-ENSMUSG00000088800|||n.18571744delA||||||	GT:AD:AF:DP:F1R2:F2R1:SB	0/0:32,0:0.029:32:14,0:18,0:11,21,0,0	0/1:37,7:0.173:44:15,0:22,7:14,23,4,3	613_T1
chr1	18591161	.	CAG	C	.	PASS	AS_FilterStatus=SITE;AS_SB_TABLE=9,31|0,3;DP=44;ECNT=1;GERMQ=91;MBQ=36,37;MFRL=408,405;MMQ=60,60;MPOS=32;NALOD=1.41;NLOD=7.21;POPAF=6.00;RPA=2,1;RU=AG;STR;STRQ=93;TLOD=9.04;ANN=C|intergenic_region|MODIFIER|Defb41-Gm24075|ENSMUSG00000067773-ENSMUSG00000088800|intergenic_region|ENSMUSG00000067773-ENSMUSG00000088800|||n.18591162_18591163delAG||||||	GT:AD:AF:DP:F1R2:F2R1:SB	0/0:24,0:0.037:24:10,0:13,0:5,19,0,0	0/1:16,3:0.189:19:5,0:11,3:4,12,0,3	3147_T1
chr1	18643791	.	C	A	.	PASS	AS_FilterStatus=SITE;AS_SB_TABLE=31,35|4,2;DP=73;ECNT=1;GERMQ=93;MBQ=34,35;MFRL=439,447;MMQ=60,60;MPOS=44;NALOD=1.54;NLOD=10.19;POPAF=6.00;TLOD=12.99;ANN=A|intergenic_region|MODIFIER|Defb41-Gm24075|ENSMUSG00000067773-ENSMUSG00000088800|intergenic_region|ENSMUSG00000067773-ENSMUSG00000088800|||n.18643791C>A||||||	GT:AD:AF:DP:F1R2:F2R1:SB	0/0:35,0:0.028:35:12,0:22,0:12,23,0,0	0/1:31,6:0.170:37:11,2:19,3:19,12,4,2	613_T1
chr1	18712436	.	TA	T	.	PASS	AS_FilterStatus=SITE;AS_SB_TABLE=33,25|2,2;DP=64;ECNT=1;GERMQ=93;MBQ=34,35;MFRL=454,458;MMQ=60,60;MPOS=41;NALOD=1.53;NLOD=9.93;POPAF=6.00;RPA=5,4;RU=A;STR;STRQ=93;TLOD=7.28;ANN=T|intergenic_region|MODIFIER|Defb41-Gm24075|ENSMUSG00000067773-ENSMUSG00000088800|intergenic_region|ENSMUSG00000067773-ENSMUSG00000088800|||n.18712437delA||||||	GT:AD:AF:DP:F1R2:F2R1:SB	0/0:34,0:0.029:34:22,0:11,0:19,15,0,0	0/1:24,4:0.165:28:11,2:13,2:14,10,2,2	613_T1
chr1	18728004	.	TG	T	.	PASS	AS_FilterStatus=SITE;AS_SB_TABLE=20,24|3,1;DP=48;ECNT=1;GERMQ=93;MBQ=35,35;MFRL=430,462;MMQ=60,60;MPOS=36;NALOD=1.48;NLOD=8.11;POPAF=6.00;RPA=7,6;RU=G;STR;STRQ=93;TLOD=7.32;ANN=T|intergenic_region|MODIFIER|Defb41-Gm24075|ENSMUSG00000067773-ENSMUSG00000088800|intergenic_region|ENSMUSG00000067773-ENSMUSG00000088800|||n.18728005delG||||||	GT:AD:AF:DP:F1R2:F2R1:SB	0/0:27,0:0.032:27:15,0:11,0:13,14,0,0	0/1:17,4:0.215:21:7,2:10,2:7,10,3,1	3147_T1
chr1	18754985	.	TAA	T	.	PASS	AS_FilterStatus=SITE;AS_SB_TABLE=8,18|1,3;DP=46;ECNT=1;GERMQ=57;MBQ=33,22;MFRL=444,415;MMQ=60,60;MPOS=30;NALOD=0.968;NLOD=5.96;POPAF=6.00;RPA=22,20;RU=A;STR;STRQ=93;TLOD=7.08;ANN=T|intergenic_region|MODIFIER|Defb41-Gm24075|ENSMUSG00000067773-ENSMUSG00000088800|intergenic_region|ENSMUSG00000067773-ENSMUSG00000088800|||n.18754986_18754987delAA||||||	GT:AD:AF:DP:F1R2:F2R1:SB	0/0:20,0:0.038:20:4,0:6,0:4,16,0,0	0/1:6,4:0.412:10:2,1:3,1:4,2,1,3	2985_T1
chr1	18762750	.	T	C	.	PASS	AS_FilterStatus=SITE;AS_SB_TABLE=22,26|4,0;DP=56;ECNT=2;GERMQ=93;MBQ=34,32;MFRL=451,546;MMQ=40,40;MPOS=22;NALOD=1.43;NLOD=7.52;POPAF=6.00;TLOD=9.01;ANN=C|intergenic_region|MODIFIER|Defb41-Gm24075|ENSMUSG00000067773-ENSMUSG00000088800|intergenic_region|ENSMUSG00000067773-ENSMUSG00000088800|||n.18762750T>C||||||	GT:AD:AF:DP:F1R2:F2R1:SB	0/0:25,0:0.036:25:11,0:14,0:8,17,0,0	0/1:23,4:0.172:27:14,3:8,1:14,9,4,0	3147_T1
chr1	18801235	.	AT	A	.	PASS	AS_FilterStatus=SITE;AS_SB_TABLE=23,26|3,0;DP=57;ECNT=1;GERMQ=93;MBQ=34,33;MFRL=430,471;MMQ=60,60;MPOS=26;NALOD=1.40;NLOD=6.30;POPAF=6.00;RPA=4,3;RU=T;STR;STRQ=93;TLOD=5.16;ANN=A|intergenic_region|MODIFIER|Defb41-Gm24075|ENSMUSG00000067773-ENSMUSG00000088800|intergenic_region|ENSMUSG00000067773-ENSMUSG00000088800|||n.18801236delT||||||	GT:AD:AF:DP:F1R2:F2R1:SB	0/0:21,0:0.039:21:9,0:11,0:11,10,0,0	0/1:28,3:0.120:31:15,1:12,2:12,16,3,0	613_T1
chr1	18834525	.	TC	AT	.	PASS	AS_FilterStatus=SITE;AS_SB_TABLE=33,32|0,3;DP=72;ECNT=1;GERMQ=93;MBQ=35,34;MFRL=437,417;MMQ=60,60;MPOS=38;NALOD=1.66;NLOD=12.94;POPAF=6.00;TLOD=8.72;ANN=AT|intergenic_region|MODIFIER|Defb41-Gm24075|ENSMUSG00000067773-ENSMUSG00000088800|intergenic_region|ENSMUSG00000067773-ENSMUSG00000088800|||n.18834525_18834526delTCinsAT||||||	GT:AD:AF:DP:F1R2:F2R1:SB	0/0:43,0:0.022:43:22,0:20,0:25,18,0,0	0/1:22,3:0.148:25:10,0:11,3:8,14,0,3	2985_T1
chr1	18836209	.	G	T	.	PASS	AS_FilterStatus=SITE;AS_SB_TABLE=27,31|2,5;DP=67;ECNT=1;GERMQ=93;MBQ=34,35;MFRL=431,442;MMQ=60,60;MPOS=42;NALOD=1.48;NLOD=8.72;POPAF=6.00;TLOD=19.55;ANN=T|intergenic_region|MODIFIER|Defb41-Gm24075|ENSMUSG00000067773-ENSMUSG00000088800|intergenic_region|ENSMUSG00000067773-ENSMUSG00000088800|||n.18836209G>T||||||	GT:AD:AF:DP:F1R2:F2R1:SB	0/0:30,0:0.032:30:14,0:14,0:17,13,0,0	0/1:28,7:0.217:35:14,4:12,3:10,18,2,5	613_T1
chr1	18845535	.	G	T	.	PASS	AS_FilterStatus=SITE;AS_SB_TABLE=34,32|3,3;DP=75;ECNT=1;GERMQ=93;MBQ=35,35;MFRL=430,437;MMQ=60,60;MPOS=39;NALOD=1.60;NLOD=11.44;POPAF=6.00;TLOD=16.37;ANN=T|intergenic_region|MODIFIER|Defb41-Gm24075|ENSMUSG00000067773-ENSMUSG00000088800|intergenic_region|ENSMUSG00000067773-ENSMUSG00000088800|||n.18845535G>T||||||	GT:AD:AF:DP:F1R2:F2R1:SB	0/0:39,0:0.025:39:16,0:23,0:23,16,0,0	0/1:27,6:0.205:33:13,5:14,1:11,16,3,3	2985_T1
chr1	18846771	.	C	T	.	PASS	AS_FilterStatus=SITE;AS_SB_TABLE=27,27|1,3;DP=60;ECNT=1;GERMQ=93;MBQ=29,34;MFRL=447,472;MMQ=60,60;MPOS=40;NALOD=1.60;NLOD=11.34;POPAF=6.00;TLOD=10.59;ANN=T|intergenic_region|MODIFIER|Defb41-Gm24075|ENSMUSG00000067773-ENSMUSG00000088800|intergenic_region|ENSMUSG00000067773-ENSMUSG00000088800|||n.18846771C>T||||||	GT:AD:AF:DP:F1R2:F2R1:SB	0/0:38,0:0.025:38:20,0:15,0:18,20,0,0	0/1:16,4:0.227:20:9,0:7,4:9,7,1,3	2985_T1
chr1	18847714	.	CA	C	.	PASS	AS_FilterStatus=SITE;AS_SB_TABLE=28,37|7,1;DP=80;ECNT=1;GERMQ=93;MBQ=36,32;MFRL=462,399;MMQ=60,60;MPOS=51;NALOD=1.54;NLOD=9.55;POPAF=6.00;RPA=7,6;RU=A;STR;STRQ=93;TLOD=12.29;ANN=C|intergenic_region|MODIFIER|Defb41-Gm24075|ENSMUSG00000067773-ENSMUSG00000088800|intergenic_region|ENSMUSG00000067773-ENSMUSG00000088800|||n.18847715delA||||||	GT:AD:AF:DP:F1R2:F2R1:SB	0/0:32,0:0.028:32:16,0:14,0:14,18,0,0	0/1:33,8:0.194:41:16,2:15,6:14,19,7,1	613_T1
chr1	18859039	.	CTTT	C	.	PASS	AS_FilterStatus=SITE;AS_SB_TABLE=22,17|3,2;DP=53;ECNT=1;GERMQ=71;MBQ=33,33;MFRL=423,506;MMQ=60,60;MPOS=51;NALOD=0.925;NLOD=5.91;POPAF=6.00;RPA=14,11;RU=T;STR;STRQ=93;TLOD=6.19;ANN=C|intergenic_region|MODIFIER|Defb41-Gm24075|ENSMUSG00000067773-ENSMUSG00000088800|intergenic_region|ENSMUSG00000067773-ENSMUSG00000088800|||n.18859040_18859042delTTT||||||	GT:AD:AF:DP:F1R2:F2R1:SB	0/0:20,0:0.042:20:9,0:10,0:11,9,0,0	0/1:19,5:0.196:24:12,3:6,2:11,8,3,2	613_T1
chr1	18917045	.	TTG	T	.	PASS	AS_FilterStatus=SITE;AS_SB_TABLE=12,13|4,0;DP=32;ECNT=2;GERMQ=49;MBQ=34,22;MFRL=468,399;MMQ=60,60;MPOS=7;NALOD=1.19;NLOD=3.75;POPAF=6.00;TLOD=5.28;ANN=T|intergenic_region|MODIFIER|Defb41-Gm24075|ENSMUSG00000067773-ENSMUSG00000088800|intergenic_region|ENSMUSG00000067773-ENSMUSG00000088800|||n.18917046_18917047delTG||||||	GT:AD:AF:DP:F1R2:F2R1:PGT:PID:PS:SB	0|0:12,0:0.062:12:7,0:4,0:0|1:18917045_TTG_T:18917045:7,5,0,0	0|1:13,4:0.254:17:5,0:6,2:0|1:18917045_TTG_T:18917045:5,8,4,0	613_T1
chr1	18917054	.	A	G	.	PASS	AS_FilterStatus=SITE;AS_SB_TABLE=9,13|4,0;DP=29;ECNT=2;GERMQ=39;MBQ=36,29;MFRL=451,399;MMQ=60,60;MPOS=1;NALOD=1.14;NLOD=3.22;POPAF=6.00;TLOD=5.42;ANN=G|intergenic_region|MODIFIER|Defb41-Gm24075|ENSMUSG00000067773-ENSMUSG00000088800|intergenic_region|ENSMUSG00000067773-ENSMUSG00000088800|||n.18917054A>G||||||	GT:AD:AF:DP:F1R2:F2R1:PGT:PID:PS:SB	0|0:10,0:0.069:10:5,0:3,0:0|1:18917045_TTG_T:18917045:5,5,0,0	0|1:12,4:0.269:16:7,0:4,2:0|1:18917045_TTG_T:18917045:4,8,4,0	613_T1
chr1	18923791	.	C	CA	.	PASS	AS_FilterStatus=SITE;AS_SB_TABLE=30,32|4,4;DP=73;ECNT=1;GERMQ=93;MBQ=35,34;MFRL=451,461;MMQ=60,60;MPOS=37;NALOD=1.65;NLOD=12.64;POPAF=6.00;RPA=3,4;RU=A;STR;STRQ=93;TLOD=19.09;ANN=CA|intergenic_region|MODIFIER|Defb41-Gm24075|ENSMUSG00000067773-ENSMUSG00000088800|intergenic_region|ENSMUSG00000067773-ENSMUSG00000088800|||n.18923791_18923792insA||||||	GT:AD:AF:DP:F1R2:F2R1:SB	0/0:43,0:0.022:43:23,0:20,0:22,21,0,0	0/1:19,8:0.309:27:10,5:9,3:8,11,4,4	2985_T1
chr1	18934329	.	G	A	.	PASS	AS_FilterStatus=SITE;AS_SB_TABLE=21,20|1,4;DP=48;ECNT=1;GERMQ=81;MBQ=35,35;MFRL=446,448;MMQ=60,60;MPOS=42;NALOD=1.33;NLOD=5.72;POPAF=6.00;TLOD=13.44;ANN=A|intergenic_region|MODIFIER|Defb41-Gm24075|ENSMUSG00000067773-ENSMUSG00000088800|intergenic_region|ENSMUSG00000067773-ENSMUSG00000088800|||n.18934329G>A||||||	GT:AD:AF:DP:F1R2:F2R1:SB	0/0:19,0:0.045:19:10,0:9,0:11,8,0,0	0/1:22,5:0.208:27:10,3:11,2:10,12,1,4	613_T1
chr1	19019783	.	A	T	.	PASS	AS_FilterStatus=SITE;AS_SB_TABLE=39,42|2,2;DP=86;ECNT=1;GERMQ=93;MBQ=35,35;MFRL=454,447;MMQ=60,60;MPOS=56;NALOD=1.54;NLOD=10.19;POPAF=6.00;TLOD=8.84;ANN=T|intergenic_region|MODIFIER|Gm24075-Gm15825|ENSMUSG00000088800-ENSMUSG00000089787|intergenic_region|ENSMUSG00000088800-ENSMUSG00000089787|||n.19019783A>T||||||	GT:AD:AF:DP:F1R2:F2R1:SB	0/0:34,0:0.028:34:15,0:18,0:18,16,0,0	0/1:47,4:0.096:51:28,2:17,2:21,26,2,2	613_T1
chr1	19085808	.	CGTGT	C	.	PASS	AS_FilterStatus=SITE;AS_SB_TABLE=16,11|2,2;DP=53;ECNT=1;GERMQ=54;MBQ=34,31;MFRL=431,480;MMQ=60,60;MPOS=63;NALOD=0.821;NLOD=5.33;POPAF=6.00;RPA=24,22;RU=GT;STR;STRQ=93;TLOD=13.83;ANN=C|intron_variant|MODIFIER|Gm15825|ENSMUSG00000089787|transcript|ENSMUST00000159108|antisense|1/3|n.172-10348_172-10345delACAC||||||	GT:AD:AF:DP:F1R2:F2R1:SB	0/0:18,0:0.042:18:8,0:7,0:12,6,0,0	0/1:9,4:0.338:13:4,2:2,2:4,5,2,2	613_T1
chr1	19114561	.	G	A	.	PASS	AS_FilterStatus=SITE;AS_SB_TABLE=26,18|1,3;DP=48;ECNT=2;GERMQ=91;MBQ=35,28;MFRL=445,273;MMQ=60,60;MPOS=29;NALOD=1.39;NLOD=6.92;POPAF=6.00;TLOD=8.20;ANN=A|intron_variant|MODIFIER|Tfap2d|ENSMUSG00000042596|transcript|ENSMUST00000037294|protein_coding|3/7|c.599-4269G>A||||||	GT:AD:AF:DP:F1R2:F2R1:SB	0/0:24,0:0.039:24:11,0:12,0:11,13,0,0	0/1:20,4:0.161:24:10,2:6,2:15,5,1,3	2985_T1
chr1	19121983	.	T	C	.	PASS	AS_FilterStatus=SITE;AS_SB_TABLE=33,27|2,2;DP=68;ECNT=1;GERMQ=93;MBQ=35,35;MFRL=461,529;MMQ=60,60;MPOS=36;NALOD=1.56;NLOD=10.53;POPAF=6.00;TLOD=10.04;ANN=C|intron_variant|MODIFIER|Tfap2d|ENSMUSG00000042596|transcript|ENSMUST00000037294|protein_coding|5/7|c.883+2703T>C||||||	GT:AD:AF:DP:F1R2:F2R1:SB	0/0:35,0:0.027:35:24,0:11,0:19,16,0,0	0/1:25,4:0.161:29:9,0:16,4:14,11,2,2	2985_T1
chr1	19125729	.	T	C	.	PASS	AS_FilterStatus=SITE;AS_SB_TABLE=21,16|1,3;DP=42;ECNT=1;GERMQ=75;MBQ=35,35;MFRL=468,313;MMQ=60,60;MPOS=28;NALOD=1.04;NLOD=5.68;POPAF=6.00;TLOD=7.87;ANN=C|intron_variant|MODIFIER|Tfap2d|ENSMUSG00000042596|transcript|ENSMUST00000037294|protein_coding|5/7|c.883+6449T>C||||||	GT:AD:AF:DP:F1R2:F2R1:SB	0/0:19,0:0.045:19:10,0:8,0:13,6,0,0	0/1:18,4:0.171:22:4,1:13,3:8,10,1,3	2985_T1
chr1	19184456	.	C	T	.	PASS	AS_FilterStatus=SITE;AS_SB_TABLE=32,28|4,0;DP=66;ECNT=1;GERMQ=93;MBQ=28,35;MFRL=446,472;MMQ=60,46;MPOS=37;NALOD=1.43;NLOD=7.73;POPAF=6.00;TLOD=9.41;ANN=T|intergenic_region|MODIFIER|Tfap2d-Tfap2b|ENSMUSG00000042596-ENSMUSG00000025927|intergenic_region|ENSMUSG00000042596-ENSMUSG00000025927|||n.19184456C>T||||||	GT:AD:AF:DP:F1R2:F2R1:SB	0/0:26,0:0.036:26:13,0:11,0:13,13,0,0	0/1:34,4:0.128:38:11,2:20,2:19,15,4,0	613_T1
chr1	19233593	.	T	A	.	PASS	AS_FilterStatus=SITE;AS_SB_TABLE=5,15|0,4;DP=44;ECNT=1;GERMQ=28;MBQ=21,23;MFRL=418,504;MMQ=60,60;MPOS=37;NALOD=1.25;NLOD=3.36;POPAF=6.00;TLOD=5.90;ANN=A|intron_variant|MODIFIER|Tfap2b|ENSMUSG00000025927|transcript|ENSMUST00000027059|protein_coding|6/6|c.1083-457T>A||||||	GT:AD:AF:DP:F1R2:F2R1:SB	0/0:13,0:0.058:13:2,0:5,0:4,9,0,0	0/1:7,4:0.393:11:2,1:1,1:1,6,0,4	3147_T1
chr1	19310858	.	C	T	.	PASS	AS_FilterStatus=SITE;AS_SB_TABLE=36,33|2,1;DP=77;ECNT=1;GERMQ=93;MBQ=33,34;MFRL=435,355;MMQ=60,50;MPOS=56;NALOD=1.57;NLOD=10.83;POPAF=6.00;TLOD=6.29;ANN=T|intergenic_region|MODIFIER|Tfap2b-Gm24633|ENSMUSG00000025927-ENSMUSG00000084668|intergenic_region|ENSMUSG00000025927-ENSMUSG00000084668|||n.19310858C>T||||||	GT:AD:AF:DP:F1R2:F2R1:SB	0/0:36,0:0.026:36:16,0:20,0:18,18,0,0	0/1:33,3:0.105:36:15,1:17,2:18,15,2,1	613_T1
chr1	19372554	.	G	T	.	PASS	AS_FilterStatus=SITE;AS_SB_TABLE=5,19|1,3;DP=29;ECNT=1;GERMQ=43;MBQ=33,34;MFRL=480,511;MMQ=40,35;MPOS=64;NALOD=1.14;NLOD=3.86;POPAF=6.00;TLOD=9.64;ANN=T|intergenic_region|MODIFIER|Tfap2b-Gm24633|ENSMUSG00000025927-ENSMUSG00000084668|intergenic_region|ENSMUSG00000025927-ENSMUSG00000084668|||n.19372554G>T||||||	GT:AD:AF:DP:F1R2:F2R1:SB	0/0:13,0:0.067:13:6,0:6,0:4,9,0,0	0/1:11,4:0.317:15:6,1:3,3:1,10,1,3	2985_T1
chr1	19378850	.	TAA	T	.	PASS	AS_FilterStatus=SITE;AS_SB_TABLE=21,22|2,1;DP=65;ECNT=1;GERMQ=93;MBQ=34,37;MFRL=421,420;MMQ=60,60;MPOS=25;NALOD=1.05;NLOD=7.53;POPAF=6.00;RPA=17,15;RU=A;STR;STRQ=93;TLOD=4.96;ANN=T|intergenic_region|MODIFIER|Tfap2b-Gm24633|ENSMUSG00000025927-ENSMUSG00000084668|intergenic_region|ENSMUSG00000025927-ENSMUSG00000084668|||n.19378851_19378852delAA||||||	GT:AD:AF:DP:F1R2:F2R1:SB	0/0:25,0:0.033:25:10,0:11,0:13,12,0,0	0/1:18,3:0.171:21:7,2:9,1:8,10,2,1	613_T1
chr1	19398473	.	C	T	.	PASS	AS_FilterStatus=SITE;AS_SB_TABLE=26,32|2,1;DP=62;ECNT=1;GERMQ=93;MBQ=35,35;MFRL=439,458;MMQ=60,60;MPOS=17;NALOD=1.62;NLOD=12.29;POPAF=6.00;TLOD=7.54;ANN=T|intergenic_region|MODIFIER|Tfap2b-Gm24633|ENSMUSG00000025927-ENSMUSG00000084668|intergenic_region|ENSMUSG00000025927-ENSMUSG00000084668|||n.19398473C>T||||||	GT:AD:AF:DP:F1R2:F2R1:SB	0/0:41,0:0.023:41:20,0:20,0:18,23,0,0	0/1:17,3:0.181:20:9,1:8,2:8,9,2,1	613_T1
chr1	19410125	.	T	C	.	PASS	AS_FilterStatus=SITE;AS_SB_TABLE=40,27|2,3;DP=76;ECNT=2;GERMQ=93;MBQ=34,36;MFRL=470,493;MMQ=60,60;MPOS=33;NALOD=1.57;NLOD=9.91;POPAF=6.00;TLOD=11.94;ANN=C|intergenic_region|MODIFIER|Tfap2b-Gm24633|ENSMUSG00000025927-ENSMUSG00000084668|intergenic_region|ENSMUSG00000025927-ENSMUSG00000084668|||n.19410125T>C||||||	GT:AD:AF:DP:F1R2:F2R1:PGT:PID:PS:SB	0|0:33,0:0.027:33:13,0:19,0:0|1:19410125_T_C:19410125:20,13,0,0	0|1:34,5:0.145:39:21,3:13,2:0|1:19410125_T_C:19410125:20,14,2,3	613_T1
chr1	19421965	.	G	T	.	PASS	AS_FilterStatus=SITE;AS_SB_TABLE=29,31|3,3;DP=70;ECNT=1;GERMQ=93;MBQ=35,35;MFRL=467,402;MMQ=60,60;MPOS=26;NALOD=1.56;NLOD=9.93;POPAF=6.00;TLOD=15.72;ANN=T|intergenic_region|MODIFIER|Tfap2b-Gm24633|ENSMUSG00000025927-ENSMUSG00000084668|intergenic_region|ENSMUSG00000025927-ENSMUSG00000084668|||n.19421965G>T||||||	GT:AD:AF:DP:F1R2:F2R1:SB	0/0:33,0:0.027:33:15,0:18,0:20,13,0,0	0/1:27,6:0.202:33:15,3:9,3:9,18,3,3	613_T1
chr1	19441430	.	CGTGT	C	.	PASS	AS_FilterStatus=SITE;AS_SB_TABLE=7,12|2,1;DP=37;ECNT=1;GERMQ=31;MBQ=29,34;MFRL=427,367;MMQ=60,60;MPOS=55;NALOD=1.20;NLOD=2.94;POPAF=6.00;RPA=21,19;RU=GT;STR;STRQ=93;TLOD=9.16;ANN=C|intergenic_region|MODIFIER|Tfap2b-Gm24633|ENSMUSG00000025927-ENSMUSG00000084668|intergenic_region|ENSMUSG00000025927-ENSMUSG00000084668|||n.19441431_19441434delGTGT||||||	GT:AD:AF:DP:F1R2:F2R1:SB	0/0:10,0:0.066:10:3,0:5,0:3,7,0,0	0/1:9,3:0.283:12:4,1:4,2:4,5,2,1	3147_T1
chr1	19456502	.	G	GA	.	PASS	AS_FilterStatus=SITE;AS_SB_TABLE=27,23|2,2;DP=59;ECNT=1;GERMQ=93;MBQ=35,35;MFRL=432,453;MMQ=60,60;MPOS=59;NALOD=1.43;NLOD=7.23;POPAF=6.00;RPA=7,8;RU=A;STR;STRQ=93;TLOD=6.26;ANN=GA|intergenic_region|MODIFIER|Tfap2b-Gm24633|ENSMUSG00000025927-ENSMUSG00000084668|intergenic_region|ENSMUSG00000025927-ENSMUSG00000084668|||n.19456502_19456503insA||||||	GT:AD:AF:DP:F1R2:F2R1:SB	0/0:24,0:0.036:24:13,0:11,0:13,11,0,0	0/1:26,4:0.155:30:20,3:6,1:14,12,2,2	613_T1
chr1	19480541	.	G	GT	.	PASS	AS_FilterStatus=SITE;AS_SB_TABLE=32,31|4,2;DP=70;ECNT=1;GERMQ=93;MBQ=32,36;MFRL=446,398;MMQ=60,60;MPOS=29;NALOD=1.57;NLOD=10.53;POPAF=6.00;RPA=6,7;RU=T;STR;STRQ=93;TLOD=10.96;ANN=GT|intergenic_region|MODIFIER|Tfap2b-Gm24633|ENSMUSG00000025927-ENSMUSG00000084668|intergenic_region|ENSMUSG00000025927-ENSMUSG00000084668|||n.19480541_19480542insT||||||	GT:AD:AF:DP:F1R2:F2R1:SB	0/0:35,0:0.026:35:14,0:16,0:14,21,0,0	0/1:28,6:0.193:34:14,3:12,3:18,10,4,2	613_T1
chr1	19483643	.	TTGTG	T	.	PASS	AS_FilterStatus=SITE;AS_SB_TABLE=8,12|3,1;DP=44;ECNT=1;GERMQ=32;MBQ=34,34;MFRL=440,443;MMQ=60,60;MPOS=55;NALOD=0.906;NLOD=3.24;POPAF=6.00;RPA=22,20;RU=TG;STR;STRQ=93;TLOD=14.18;ANN=T|intergenic_region|MODIFIER|Tfap2b-Gm24633|ENSMUSG00000025927-ENSMUSG00000084668|intergenic_region|ENSMUSG00000025927-ENSMUSG00000084668|||n.19483644_19483647delTGTG||||||	GT:AD:AF:DP:F1R2:F2R1:SB	0/0:11,0:0.065:11:5,0:4,0:4,7,0,0	0/1:9,4:0.340:13:3,1:6,3:4,5,3,1	2985_T1
chr1	19486155	.	A	G	.	PASS	AS_FilterStatus=SITE;AS_SB_TABLE=20,35|2,1;DP=60;ECNT=1;GERMQ=93;MBQ=34,37;MFRL=441,561;MMQ=60,60;MPOS=33;NALOD=1.43;NLOD=7.83;POPAF=6.00;TLOD=7.06;ANN=G|intergenic_region|MODIFIER|Tfap2b-Gm24633|ENSMUSG00000025927-ENSMUSG00000084668|intergenic_region|ENSMUSG00000025927-ENSMUSG00000084668|||n.19486155A>G||||||	GT:AD:AF:DP:F1R2:F2R1:SB	0/0:26,0:0.036:26:9,0:17,0:11,15,0,0	0/1:29,3:0.121:32:14,0:15,3:9,20,2,1	613_T1
chr1	19523909	.	G	T	.	PASS	AS_FilterStatus=SITE;AS_SB_TABLE=42,28|4,7;DP=83;ECNT=1;GERMQ=93;MBQ=36,34;MFRL=435,484;MMQ=60,60;MPOS=47;NALOD=1.62;NLOD=11.99;POPAF=6.00;TLOD=31.70;ANN=T|intergenic_region|MODIFIER|Gm24633-Gm25568|ENSMUSG00000084668-ENSMUSG00000077860|intergenic_region|ENSMUSG00000084668-ENSMUSG00000077860|||n.19523909G>T||||||	GT:AD:AF:DP:F1R2:F2R1:SB	0/0:42,0:0.023:42:25,0:16,0:24,18,0,0	0/1:28,11:0.293:39:14,8:14,3:18,10,4,7	2985_T1
chr1	19545897	.	CA	C	.	PASS	AS_FilterStatus=SITE;AS_SB_TABLE=25,26|4,13;DP=74;ECNT=1;GERMQ=93;MBQ=33,36;MFRL=415,467;MMQ=60,60;MPOS=40;NALOD=1.28;NLOD=10.36;POPAF=6.00;RPA=14,13;RU=A;STR;STRQ=22;TLOD=29.18;ANN=C|intergenic_region|MODIFIER|Gm24633-Gm25568|ENSMUSG00000084668-ENSMUSG00000077860|intergenic_region|ENSMUSG00000084668-ENSMUSG00000077860|||n.19545898delA||||||	GT:AD:AF:DP:F1R2:F2R1:SB	0/0:35,0:0.026:35:11,0:22,0:17,18,0,0	0/1:16,17:0.497:33:5,10:10,6:8,8,4,13	2985_T1
chr1	19616107	.	A	T	.	PASS	AS_FilterStatus=SITE;AS_SB_TABLE=23,29|2,4;DP=59;ECNT=1;GERMQ=93;MBQ=36,34;MFRL=441,400;MMQ=60,60;MPOS=12;NALOD=1.48;NLOD=8.68;POPAF=6.00;TLOD=16.12;ANN=T|intergenic_region|MODIFIER|Gm24633-Gm25568|ENSMUSG00000084668-ENSMUSG00000077860|intergenic_region|ENSMUSG00000084668-ENSMUSG00000077860|||n.19616107A>T||||||	GT:AD:AF:DP:F1R2:F2R1:SB	0/0:29,0:0.032:29:13,0:15,0:12,17,0,0	0/1:23,6:0.233:29:9,3:14,3:11,12,2,4	2985_T1
chr1	19622825	.	G	A	.	PASS	AS_FilterStatus=SITE;AS_SB_TABLE=26,31|0,3;DP=60;ECNT=1;GERMQ=93;MBQ=31,35;MFRL=443,483;MMQ=40,40;MPOS=48;NALOD=1.48;NLOD=8.63;POPAF=6.00;TLOD=5.93;ANN=A|intergenic_region|MODIFIER|Gm24633-Gm25568|ENSMUSG00000084668-ENSMUSG00000077860|intergenic_region|ENSMUSG00000084668-ENSMUSG00000077860|||n.19622825G>A||||||	GT:AD:AF:DP:F1R2:F2R1:SB	0/0:29,0:0.032:29:17,0:10,0:13,16,0,0	0/1:28,3:0.125:31:12,2:16,1:13,15,0,3	613_T1
chr1	19637378	.	TC	T	.	PASS	AS_FilterStatus=SITE;AS_SB_TABLE=15,25|3,1;DP=46;ECNT=1;GERMQ=90;MBQ=35,36;MFRL=439,433;MMQ=60,60;MPOS=42;NALOD=1.43;NLOD=7.21;POPAF=6.00;RPA=7,6;RU=C;STR;STRQ=93;TLOD=7.05;ANN=T|intergenic_region|MODIFIER|Gm24633-Gm25568|ENSMUSG00000084668-ENSMUSG00000077860|intergenic_region|ENSMUSG00000084668-ENSMUSG00000077860|||n.19637379delC||||||	GT:AD:AF:DP:F1R2:F2R1:SB	0/0:24,0:0.036:24:5,0:12,0:10,14,0,0	0/1:16,4:0.225:20:2,3:11,1:5,11,3,1	613_T1
chr1	19668632	.	C	T	.	PASS	AS_FilterStatus=SITE;AS_SB_TABLE=24,29|3,2;DP=60;ECNT=1;GERMQ=93;MBQ=28,35;MFRL=438,478;MMQ=60,60;MPOS=38;NALOD=1.23;NLOD=9.58;POPAF=6.00;TLOD=9.66;ANN=T|intergenic_region|MODIFIER|Gm24633-Gm25568|ENSMUSG00000084668-ENSMUSG00000077860|intergenic_region|ENSMUSG00000084668-ENSMUSG00000077860|||n.19668632C>T||||||	GT:AD:AF:DP:F1R2:F2R1:SB	0/0:32,0:0.029:32:20,0:10,0:16,16,0,0	0/1:21,5:0.205:26:9,1:10,3:8,13,3,2	2985_T1
chr1	19708647	.	GA	G	.	PASS	AS_FilterStatus=SITE;AS_SB_TABLE=22,24|5,10;DP=69;ECNT=1;GERMQ=80;MBQ=34,33;MFRL=409,413;MMQ=60,60;MPOS=37;NALOD=1.52;NLOD=8.69;POPAF=6.00;RPA=13,12;RU=A;STR;STRQ=6;TLOD=26.31;ANN=G|intergenic_region|MODIFIER|Gm24633-Gm25568|ENSMUSG00000084668-ENSMUSG00000077860|intergenic_region|ENSMUSG00000084668-ENSMUSG00000077860|||n.19708648delA||||||	GT:AD:AF:DP:F1R2:F2R1:SB	0/0:29,0:0.030:29:16,0:12,0:13,16,0,0	0/1:17,15:0.465:32:5,6:11,8:9,8,5,10	2985_T1
chr1	19714028	.	CT	C	.	PASS	AS_FilterStatus=SITE;AS_SB_TABLE=23,20|5,9;DP=65;ECNT=1;GERMQ=92;MBQ=33,35;MFRL=407,457;MMQ=60,60;MPOS=37;NALOD=1.25;NLOD=9.59;POPAF=6.00;RPA=12,11;RU=T;STR;STRQ=19;TLOD=25.76;ANN=C|intergenic_region|MODIFIER|Gm24633-Gm25568|ENSMUSG00000084668-ENSMUSG00000077860|intergenic_region|ENSMUSG00000084668-ENSMUSG00000077860|||n.19714029delT||||||	GT:AD:AF:DP:F1R2:F2R1:SB	0/0:33,0:0.028:33:13,0:19,0:17,16,0,0	0/1:10,14:0.573:24:8,8:2,5:6,4,5,9	2985_T1
chr1	19727372	.	TA	T	.	PASS	AS_FilterStatus=SITE;AS_SB_TABLE=36,28|3,1;DP=72;ECNT=1;GERMQ=93;MBQ=35,36;MFRL=458,458;MMQ=60,60;MPOS=20;NALOD=1.58;NLOD=10.82;POPAF=6.00;RPA=7,6;RU=A;STR;STRQ=93;TLOD=6.52;ANN=T|intergenic_region|MODIFIER|Gm24633-Gm25568|ENSMUSG00000084668-ENSMUSG00000077860|intergenic_region|ENSMUSG00000084668-ENSMUSG00000077860|||n.19727373delA||||||	GT:AD:AF:DP:F1R2:F2R1:SB	0/0:37,0:0.026:37:20,0:17,0:20,17,0,0	0/1:27,4:0.155:31:13,4:12,0:16,11,3,1	2985_T1
chr1	19777669	.	T	C	.	PASS	AS_FilterStatus=SITE;AS_SB_TABLE=34,41|4,1;DP=82;ECNT=1;GERMQ=93;MBQ=34,34;MFRL=444,457;MMQ=60,60;MPOS=33;NALOD=1.64;NLOD=12.64;POPAF=6.00;TLOD=12.20;ANN=C|intergenic_region|MODIFIER|Gm24633-Gm25568|ENSMUSG00000084668-ENSMUSG00000077860|intergenic_region|ENSMUSG00000084668-ENSMUSG00000077860|||n.19777669T>C||||||	GT:AD:AF:DP:F1R2:F2R1:SB	0/0:42,0:0.023:42:20,0:22,0:17,25,0,0	0/1:33,5:0.150:38:14,2:18,3:17,16,4,1	613_T1
chr1	19846090	.	ATGTG	A	.	PASS	AS_FilterStatus=SITE;AS_SB_TABLE=13,24|2,3;DP=58;ECNT=1;GERMQ=74;MBQ=34,34;MFRL=421,434;MMQ=60,60;MPOS=45;NALOD=0.985;NLOD=6.56;POPAF=6.00;RPA=17,15;RU=TG;STR;STRQ=93;TLOD=10.96;ANN=A|intergenic_region|MODIFIER|Gm24633-Gm25568|ENSMUSG00000084668-ENSMUSG00000077860|intergenic_region|ENSMUSG00000084668-ENSMUSG00000077860|||n.19846091_19846094delTGTG||||||	GT:AD:AF:DP:F1R2:F2R1:SB	0/0:22,0:0.036:22:10,0:11,0:9,13,0,0	0/1:15,5:0.272:20:6,3:6,2:4,11,2,3	613_T1
chr1	19858967	.	TA	T	.	PASS	AS_FilterStatus=SITE;AS_SB_TABLE=23,26|2,4;DP=56;ECNT=1;GERMQ=93;MBQ=34,34;MFRL=420,452;MMQ=60,60;MPOS=52;NALOD=1.44;NLOD=7.82;POPAF=6.00;RPA=7,6;RU=A;STR;STRQ=93;TLOD=11.55;ANN=T|intergenic_region|MODIFIER|Gm24633-Gm25568|ENSMUSG00000084668-ENSMUSG00000077860|intergenic_region|ENSMUSG00000084668-ENSMUSG00000077860|||n.19858968delA||||||	GT:AD:AF:DP:F1R2:F2R1:SB	0/0:26,0:0.035:26:11,0:15,0:14,12,0,0	0/1:23,6:0.225:29:11,2:12,4:9,14,2,4	3147_T1
chr1	19862092	.	CAA	C	.	PASS	AS_FilterStatus=SITE;AS_SB_TABLE=31,28|2,4;DP=77;ECNT=1;GERMQ=93;MBQ=34,33;MFRL=408,381;MMQ=60,60;MPOS=30;NALOD=1.15;NLOD=9.98;POPAF=6.00;RPA=15,13;RU=A;STR;STRQ=93;TLOD=7.80;ANN=C|intergenic_region|MODIFIER|Gm24633-Gm25568|ENSMUSG00000084668-ENSMUSG00000077860|intergenic_region|ENSMUSG00000084668-ENSMUSG00000077860|||n.19862093_19862094delAA||||||	GT:AD:AF:DP:F1R2:F2R1:SB	0/0:34,0:0.026:34:14,0:15,0:19,15,0,0	0/1:25,6:0.202:31:9,3:12,2:12,13,2,4	613_T1
chr1	19866887	.	GTT	G	.	PASS	AS_FilterStatus=SITE;AS_SB_TABLE=22,30|4,2;DP=76;ECNT=1;GERMQ=93;MBQ=33,34;MFRL=437,433;MMQ=60,60;MPOS=37;NALOD=1.40;NLOD=11.44;POPAF=6.00;RPA=13,11;RU=T;STR;STRQ=93;TLOD=13.55;ANN=G|intergenic_region|MODIFIER|Gm24633-Gm25568|ENSMUSG00000084668-ENSMUSG00000077860|intergenic_region|ENSMUSG00000084668-ENSMUSG00000077860|||n.19866888_19866889delTT||||||	GT:AD:AF:DP:F1R2:F2R1:SB	0/0:38,0:0.022:38:14,0:15,0:15,23,0,0	0/1:14,6:0.316:20:6,4:4,1:7,7,4,2	613_T1
chr1	19887305	.	G	A	.	PASS	AS_FilterStatus=SITE;AS_SB_TABLE=28,36|2,1;DP=71;ECNT=1;GERMQ=93;MBQ=28,35;MFRL=444,432;MMQ=60,60;MPOS=49;NALOD=1.47;NLOD=8.38;POPAF=6.00;TLOD=6.30;ANN=A|intergenic_region|MODIFIER|Gm24633-Gm25568|ENSMUSG00000084668-ENSMUSG00000077860|intergenic_region|ENSMUSG00000084668-ENSMUSG00000077860|||n.19887305G>A||||||	GT:AD:AF:DP:F1R2:F2R1:SB	0/0:29,0:0.033:29:18,0:10,0:11,18,0,0	0/1:35,3:0.100:38:16,1:16,2:17,18,2,1	613_T1
chr1	19922110	.	A	T	.	PASS	AS_FilterStatus=SITE;AS_SB_TABLE=24,35|3,4;DP=70;ECNT=1;GERMQ=93;MBQ=34,34;MFRL=422,500;MMQ=60,60;MPOS=38;NALOD=1.58;NLOD=11.09;POPAF=6.00;TLOD=19.17;ANN=T|upstream_gene_variant|MODIFIER|Gm25568|ENSMUSG00000077860|transcript|ENSMUST00000104668|miRNA||n.-711T>A|||||711|,T|intergenic_region|MODIFIER|Gm25568-Pkhd1|ENSMUSG00000077860-ENSMUSG00000043760|intergenic_region|ENSMUSG00000077860-ENSMUSG0000…	GT:AD:AF:DP:F1R2:F2R1:SB	0/0:37,0:0.025:37:18,0:18,0:13,24,0,0	0/1:22,7:0.259:29:9,6:12,1:11,11,3,4	613_T1
chr1	19923317	.	T	TA	.	PASS	AS_FilterStatus=SITE;AS_SB_TABLE=37,38|4,5;DP=91;ECNT=1;GERMQ=93;MBQ=34,34;MFRL=439,511;MMQ=60,60;MPOS=46;NALOD=1.65;NLOD=12.34;POPAF=6.00;RPA=7,8;RU=A;STR;STRQ=93;TLOD=17.00;ANN=TA|upstream_gene_variant|MODIFIER|Gm25568|ENSMUSG00000077860|transcript|ENSMUST00000104668|miRNA||n.-1919_-1918insT|||||1919|,TA|intergenic_region|MODIFIER|Gm25568-Pkhd1|ENSMUSG00000077860-ENSMUSG00000043760|intergenic_r…	GT:AD:AF:DP:F1R2:F2R1:SB	0/0:42,0:0.022:42:19,0:23,0:21,21,0,0	0/1:33,9:0.231:42:13,3:20,6:16,17,4,5	613_T1
chr1	19949360	.	G	T	.	PASS	AS_FilterStatus=SITE;AS_SB_TABLE=39,31|2,1;DP=78;ECNT=1;GERMQ=93;MBQ=34,34;MFRL=469,458;MMQ=60,60;MPOS=11;NALOD=1.52;NLOD=9.23;POPAF=6.00;TLOD=6.16;ANN=T|intergenic_region|MODIFIER|Gm25568-Pkhd1|ENSMUSG00000077860-ENSMUSG00000043760|intergenic_region|ENSMUSG00000077860-ENSMUSG00000043760|||n.19949360G>T||||||	GT:AD:AF:DP:F1R2:F2R1:SB	0/0:32,0:0.029:32:15,0:14,0:21,11,0,0	0/1:38,3:0.097:41:17,2:20,1:18,20,2,1	613_T1
chr1	19950286	.	TA	T	.	PASS	AS_FilterStatus=SITE;AS_SB_TABLE=25,31|2,3;DP=63;ECNT=1;GERMQ=93;MBQ=33,33;MFRL=473,470;MMQ=60,60;MPOS=63;NALOD=1.53;NLOD=9.31;POPAF=6.00;RPA=7,6;RU=A;STR;STRQ=93;TLOD=9.04;ANN=T|intergenic_region|MODIFIER|Gm25568-Pkhd1|ENSMUSG00000077860-ENSMUSG00000043760|intergenic_region|ENSMUSG00000077860-ENSMUSG00000043760|||n.19950287delA||||||	GT:AD:AF:DP:F1R2:F2R1:SB	0/0:31,0:0.029:31:17,0:13,0:16,15,0,0	0/1:25,5:0.193:30:15,3:9,2:9,16,2,3	3147_T1
chr1	19980485	.	AACAC	A	.	PASS	AS_FilterStatus=SITE;AS_SB_TABLE=15,10|1,2;DP=46;ECNT=1;GERMQ=50;MBQ=35,34;MFRL=449,287;MMQ=60,60;MPOS=24;NALOD=0.806;NLOD=3.83;POPAF=6.00;RPA=25,23;RU=AC;STR;STRQ=93;TLOD=8.61;ANN=A|intergenic_region|MODIFIER|Gm25568-Pkhd1|ENSMUSG00000077860-ENSMUSG00000043760|intergenic_region|ENSMUSG00000077860-ENSMUSG00000043760|||n.19980486_19980489delACAC||||||	GT:AD:AF:DP:F1R2:F2R1:SB	0/0:13,0:0.057:13:7,0:3,0:8,5,0,0	0/1:12,3:0.232:15:5,1:2,2:7,5,1,2	613_T1
chr1	20029861	.	TA	T	.	PASS	AS_FilterStatus=SITE;AS_SB_TABLE=24,20|3,0;DP=49;ECNT=1;GERMQ=93;MBQ=34,35;MFRL=435,584;MMQ=60,60;MPOS=16;NALOD=1.46;NLOD=7.81;POPAF=6.00;RPA=6,5;RU=A;STR;STRQ=93;TLOD=5.20;ANN=T|intergenic_region|MODIFIER|Gm25568-Pkhd1|ENSMUSG00000077860-ENSMUSG00000043760|intergenic_region|ENSMUSG00000077860-ENSMUSG00000043760|||n.20029862delA||||||	GT:AD:AF:DP:F1R2:F2R1:SB	0/0:26,0:0.034:26:10,0:15,0:15,11,0,0	0/1:18,3:0.180:21:10,0:8,3:9,9,3,0	3147_T1
chr1	20061246	.	GTCTCTC	G	.	PASS	AS_FilterStatus=SITE;AS_SB_TABLE=6,19|0,3;DP=44;ECNT=1;GERMQ=41;MBQ=31,32;MFRL=415,385;MMQ=60,60;MPOS=38;NALOD=0.778;NLOD=3.23;POPAF=6.00;RPA=21,18;RU=TC;STR;STRQ=93;TLOD=7.22;ANN=G|intron_variant|MODIFIER|Pkhd1|ENSMUSG00000043760|transcript|ENSMUST00000088448|protein_coding|66/66|c.11768-2542_11768-2537delGAGAGA||||||	GT:AD:AF:DP:F1R2:F2R1:SB	0/0:11,0:0.065:11:1,0:5,0:2,9,0,0	0/1:14,3:0.206:17:4,2:5,1:4,10,0,3	613_T1
chr1	20069415	.	C	T	.	PASS	AS_FilterStatus=SITE;AS_SB_TABLE=28,24|1,4;DP=58;ECNT=1;GERMQ=93;MBQ=32,34;MFRL=424,441;MMQ=60,60;MPOS=28;NALOD=1.41;NLOD=7.48;POPAF=6.00;TLOD=13.32;ANN=T|intron_variant|MODIFIER|Pkhd1|ENSMUSG00000043760|transcript|ENSMUST00000088448|protein_coding|66/66|c.11767+963G>A||||||	GT:AD:AF:DP:F1R2:F2R1:SB	0/0:26,0:0.037:26:12,0:13,0:12,14,0,0	0/1:26,5:0.182:31:13,3:13,2:16,10,1,4	613_T1
chr1	20116990	.	A	G	.	PASS	AS_FilterStatus=SITE;AS_SB_TABLE=32,17|1,2;DP=54;ECNT=1;GERMQ=93;MBQ=35,34;MFRL=452,525;MMQ=60,60;MPOS=30;NALOD=1.42;NLOD=7.52;POPAF=6.00;TLOD=6.51;ANN=G|missense_variant|MODERATE|Pkhd1|ENSMUSG00000043760|transcript|ENSMUST00000088448|protein_coding|61/67|c.11093T>C|p.Val3698Ala|11329/12935|11093/12180|3698/4059||	GT:AD:AF:DP:F1R2:F2R1:SB	0/0:26,0:0.036:26:13,0:13,0:16,10,0,0	0/1:23,3:0.142:26:13,2:10,1:16,7,1,2	3147_T1
chr1	20122293	.	TTCTCTCTC	T	.	PASS	AS_FilterStatus=SITE;AS_SB_TABLE=16,11|3,1;DP=43;ECNT=1;GERMQ=43;MBQ=35,35;MFRL=465,331;MMQ=60,60;MPOS=37;NALOD=0.743;NLOD=5.68;POPAF=6.00;RPA=26,22;RU=TC;STR;STRQ=93;TLOD=7.66;ANN=T|intron_variant|MODIFIER|Pkhd1|ENSMUSG00000043760|transcript|ENSMUST00000088448|protein_coding|60/66|c.10136-4354_10136-4347delGAGAGAGA||||||	GT:AD:AF:DP:F1R2:F2R1:SB	0/0:18,0:0.041:18:3,0:7,0:8,10,0,0	0/1:9,4:0.311:13:5,1:3,2:8,1,3,1	613_T1
chr1	20140676	.	C	A	.	PASS	AS_FilterStatus=SITE;AS_SB_TABLE=29,16|1,3;DP=51;ECNT=1;GERMQ=91;MBQ=33,35;MFRL=424,453;MMQ=60,60;MPOS=33;NALOD=1.36;NLOD=6.27;POPAF=6.00;TLOD=9.85;ANN=A|intron_variant|MODIFIER|Pkhd1|ENSMUSG00000043760|transcript|ENSMUST00000088448|protein_coding|60/66|c.10136-22729G>T||||||	GT:AD:AF:DP:F1R2:F2R1:SB	0/0:21,0:0.042:21:10,0:10,0:14,7,0,0	0/1:24,4:0.167:28:15,0:9,4:15,9,1,3	3147_T1
chr1	20213559	.	AT	A	.	PASS	AS_FilterStatus=SITE;AS_SB_TABLE=37,30|5,1;DP=77;ECNT=1;GERMQ=93;MBQ=34,34;MFRL=451,497;MMQ=60,60;MPOS=39;NALOD=1.53;NLOD=9.62;POPAF=6.00;RPA=5,4;RU=T;STR;STRQ=93;TLOD=11.32;ANN=A|intron_variant|MODIFIER|Pkhd1|ENSMUSG00000043760|transcript|ENSMUST00000088448|protein_coding|55/66|c.8625-1569delA||||||	GT:AD:AF:DP:F1R2:F2R1:SB	0/0:32,0:0.029:32:14,0:18,0:17,15,0,0	0/1:35,6:0.162:41:18,3:17,3:20,15,5,1	2985_T1
chr1	20221368	.	CAA	C	.	PASS	AS_FilterStatus=SITE;AS_SB_TABLE=23,15|2,4;DP=61;ECNT=1;GERMQ=74;MBQ=33,34;MFRL=435,384;MMQ=60,60;MPOS=43;NALOD=1.05;NLOD=6.59;POPAF=6.00;RPA=17,15;RU=A;STR;STRQ=93;TLOD=6.66;ANN=C|intron_variant|MODIFIER|Pkhd1|ENSMUSG00000043760|transcript|ENSMUST00000088448|protein_coding|54/66|c.8537-1244_8537-1243delTT||||||	GT:AD:AF:DP:F1R2:F2R1:SB	0/0:22,0:0.034:22:12,0:9,0:11,11,0,0	0/1:16,6:0.300:22:10,3:5,3:12,4,2,4	2985_T1
chr1	20221540	.	C	T	.	PASS	AS_FilterStatus=SITE;AS_SB_TABLE=36,39|1,2;DP=80;ECNT=1;GERMQ=93;MBQ=35,35;MFRL=420,534;MMQ=60,60;MPOS=26;NALOD=1.72;NLOD=15.30;POPAF=6.00;TLOD=7.19;ANN=T|intron_variant|MODIFIER|Pkhd1|ENSMUSG00000043760|transcript|ENSMUST00000088448|protein_coding|54/66|c.8536+1319G>A||||||	GT:AD:AF:DP:F1R2:F2R1:SB	0/0:52,0:0.019:52:27,0:24,0:21,31,0,0	0/1:23,3:0.143:26:12,1:10,2:15,8,1,2	2985_T1
chr1	20238042	.	CT	C	.	PASS	AS_FilterStatus=SITE;AS_SB_TABLE=32,33|3,3;DP=77;ECNT=1;GERMQ=93;MBQ=33,34;MFRL=424,495;MMQ=60,60;MPOS=51;NALOD=1.62;NLOD=11.42;POPAF=6.00;RPA=6,5;RU=T;STR;STRQ=93;TLOD=11.62;ANN=C|intron_variant|MODIFIER|Pkhd1|ENSMUSG00000043760|transcript|ENSMUST00000088448|protein_coding|53/66|c.8422+1258delA||||||	GT:AD:AF:DP:F1R2:F2R1:SB	0/0:38,0:0.024:38:18,0:20,0:20,18,0,0	0/1:27,6:0.205:33:15,4:12,2:12,15,3,3	2985_T1
chr1	20245944	.	G	A	.	PASS	AS_FilterStatus=SITE;AS_SB_TABLE=31,24|1,3;DP=61;ECNT=1;GERMQ=93;MBQ=35,35;MFRL=420,506;MMQ=60,60;MPOS=55;NALOD=1.44;NLOD=7.78;POPAF=6.00;TLOD=9.86;ANN=A|intron_variant|MODIFIER|Pkhd1|ENSMUSG00000043760|transcript|ENSMUST00000088448|protein_coding|52/66|c.8285-6506C>T||||||	GT:AD:AF:DP:F1R2:F2R1:SB	0/0:26,0:0.035:26:9,0:16,0:13,13,0,0	0/1:29,4:0.143:33:10,3:19,1:18,11,1,3	613_T1
chr1	20295638	.	TA	T	.	PASS	AS_FilterStatus=SITE;AS_SB_TABLE=50,28|2,2;DP=85;ECNT=1;GERMQ=93;MBQ=36,34;MFRL=440,458;MMQ=60,60;MPOS=65;NALOD=1.59;NLOD=11.12;POPAF=6.00;RPA=7,6;RU=A;STR;STRQ=93;TLOD=5.71;ANN=T|intron_variant|MODIFIER|Pkhd1|ENSMUSG00000043760|transcript|ENSMUST00000088448|protein_coding|50/66|c.8090-7378delT||||||	GT:AD:AF:DP:F1R2:F2R1:SB	0/0:37,0:0.025:37:20,0:17,0:21,16,0,0	0/1:41,4:0.108:45:22,1:16,3:29,12,2,2	613_T1
chr1	20301409	.	C	T	.	PASS	AS_FilterStatus=SITE;AS_SB_TABLE=25,21|4,3;DP=55;ECNT=2;GERMQ=88;MBQ=31,35;MFRL=449,491;MMQ=60,60;MPOS=33;NALOD=1.46;NLOD=7.99;POPAF=6.00;TLOD=20.53;ANN=T|intron_variant|MODIFIER|Pkhd1|ENSMUSG00000043760|transcript|ENSMUST00000088448|protein_coding|50/66|c.8089+9116G>A||||||	GT:AD:AF:DP:F1R2:F2R1:SB	0/0:26,0:0.033:26:5,0:19,0:13,13,0,0	0/1:20,7:0.276:27:9,2:10,5:12,8,4,3	3147_T1
chr1	20336511	.	T	TTCTC	.	PASS	AS_FilterStatus=SITE;AS_SB_TABLE=9,17|2,1;DP=43;ECNT=1;GERMQ=43;MBQ=34,35;MFRL=458,366;MMQ=60,60;MPOS=50;NALOD=0.963;NLOD=3.90;POPAF=6.00;RPA=22,24;RU=TC;STR;STRQ=93;TLOD=7.82;ANN=TTCTC|intron_variant|MODIFIER|Pkhd1|ENSMUSG00000043760|transcript|ENSMUST00000088448|protein_coding|48/66|c.7715+10696_7715+10699dupGAGA||||||	GT:AD:AF:DP:F1R2:F2R1:SB	0/0:13,0:0.056:13:3,0:9,0:4,9,0,0	0/1:13,3:0.215:16:5,1:6,2:5,8,2,1	613_T1
chr1	20345686	.	GCACA	G	.	PASS	AS_FilterStatus=SITE;AS_SB_TABLE=13,12|0,3;DP=39;ECNT=1;GERMQ=44;MBQ=27,34;MFRL=469,413;MMQ=60,60;MPOS=17;NALOD=0.763;NLOD=2.96;POPAF=6.00;RPA=20,18;RU=CA;STR;STRQ=93;TLOD=5.71;ANN=G|intron_variant|MODIFIER|Pkhd1|ENSMUSG00000043760|transcript|ENSMUST00000088448|protein_coding|48/66|c.7715+1521_7715+1524delTGTG||||||	GT:AD:AF:DP:F1R2:F2R1:SB	0/0:10,0:0.068:10:4,0:4,0:7,3,0,0	0/1:15,3:0.197:18:4,1:4,2:6,9,0,3	2985_T1
chr1	20351829	.	G	T	.	PASS	AS_FilterStatus=SITE;AS_SB_TABLE=36,28|5,7;DP=78;ECNT=1;GERMQ=93;MBQ=35,35;MFRL=441,368;MMQ=60,60;MPOS=52;NALOD=1.63;NLOD=12.34;POPAF=6.00;TLOD=36.95;ANN=T|intron_variant|MODIFIER|Pkhd1|ENSMUSG00000043760|transcript|ENSMUST00000088448|protein_coding|46/66|c.7336-1284C>A||||||	GT:AD:AF:DP:F1R2:F2R1:SB	0/0:41,0:0.023:41:23,0:18,0:25,16,0,0	0/1:23,12:0.351:35:10,5:13,7:11,12,5,7	2985_T1
chr1	20385845	.	CAA	C	.	PASS	AS_FilterStatus=SITE;AS_SB_TABLE=10,11|3,3;DP=40;ECNT=1;GERMQ=39;MBQ=32,31;MFRL=429,443;MMQ=60,60;MPOS=35;NALOD=0.785;NLOD=4.49;POPAF=6.00;RPA=24,22;RU=A;STR;STRQ=93;TLOD=9.75;ANN=C|intron_variant|MODIFIER|Pkhd1|ENSMUSG00000043760|transcript|ENSMUST00000088448|protein_coding|39/66|c.6476-4253_6476-4252delTT||||||,C|intron_variant|MODIFIER|4930486I03Rik|ENSMUSG00000089914|transcript|ENSMUST0000016…	GT:AD:AF:DP:F1R2:F2R1:SB	0/0:15,0:0.050:15:3,0:5,0:6,9,0,0	0/1:6,6:0.549:12:3,3:2,1:4,2,3,3	2985_T1
chr1	20446113	.	CAA	C	.	PASS	AS_FilterStatus=SITE;AS_SB_TABLE=25,28|3,5;DP=75;ECNT=1;GERMQ=93;MBQ=33,35;MFRL=455,445;MMQ=60,60;MPOS=34;NALOD=1.08;NLOD=5.70;POPAF=6.00;RPA=12,10;RU=A;STR;STRQ=93;TLOD=21.49;ANN=C|upstream_gene_variant|MODIFIER|Gm15795|ENSMUSG00000090142|transcript|ENSMUST00000160969|processed_pseudogene||n.-1555_-1554delTT|||||1554|,C|upstream_gene_variant|MODIFIER|Gm24162|ENSMUSG00000070175|transcript|ENSMUST…	GT:AD:AF:DP:F1R2:F2R1:SB	0/0:20,0:0.042:20:6,0:13,0:9,11,0,0	0/1:33,8:0.209:41:18,6:10,2:16,17,3,5	613_T1
chr1	20493596	.	CAAAAAA	C	.	PASS	AS_FilterStatus=SITE;AS_SB_TABLE=16,10|2,2;DP=36;ECNT=1;GERMQ=41;MBQ=32,30;MFRL=451,477;MMQ=60,60;MPOS=20;NALOD=0.788;NLOD=4.17;POPAF=6.00;RPA=22,16;RU=A;STR;STRQ=93;TLOD=9.26;ANN=C|intron_variant|MODIFIER|Pkhd1|ENSMUSG00000043760|transcript|ENSMUST00000088448|protein_coding|35/66|c.5739+9340_5739+9345delTTTTTT||||||	GT:AD:AF:DP:F1R2:F2R1:SB	0/0:14,0:0.058:14:4,0:1,0:7,7,0,0	0/1:12,4:0.264:16:8,2:3,1:9,3,2,2	613_T1
chr1	20514645	.	TAA	T	.	PASS	AS_FilterStatus=SITE;AS_SB_TABLE=8,18|5,1;DP=46;ECNT=1;GERMQ=49;MBQ=28,36;MFRL=436,480;MMQ=60,60;MPOS=35;NALOD=1.09;NLOD=5.41;POPAF=6.00;RPA=17,15;RU=A;STR;STRQ=93;TLOD=11.90;ANN=T|intron_variant|MODIFIER|Pkhd1|ENSMUSG00000043760|transcript|ENSMUST00000088448|protein_coding|33/66|c.5368+5507_5368+5508delTT||||||	GT:AD:AF:DP:F1R2:F2R1:SB	0/0:18,0:0.044:18:5,0:8,0:5,13,0,0	0/1:8,6:0.436:14:1,5:2,1:3,5,5,1	2985_T1
chr1	20526393	.	GAA	G	.	PASS	AS_FilterStatus=SITE;AS_SB_TABLE=15,17|3,0;DP=42;ECNT=1;GERMQ=65;MBQ=33,36;MFRL=470,523;MMQ=60,60;MPOS=44;NALOD=0.967;NLOD=4.49;POPAF=6.00;RPA=15,13;RU=A;STR;STRQ=93;TLOD=6.85;ANN=G|intron_variant|MODIFIER|Pkhd1|ENSMUSG00000043760|transcript|ENSMUST00000088448|protein_coding|31/66|c.3623-2130_3623-2129delTT||||||	GT:AD:AF:DP:F1R2:F2R1:SB	0/0:15,0:0.054:15:7,0:6,0:6,9,0,0	0/1:17,3:0.188:20:9,3:6,0:9,8,3,0	3147_T1
chr1	20632989	.	G	T	.	PASS	AS_FilterStatus=SITE;AS_SB_TABLE=37,13|2,2;DP=55;ECNT=1;GERMQ=93;MBQ=36,35;MFRL=419,452;MMQ=60,60;MPOS=34;NALOD=1.48;NLOD=8.73;POPAF=6.00;TLOD=10.59;ANN=T|intergenic_region|MODIFIER|Pkhd1-Mir206|ENSMUSG00000043760-ENSMUSG00000065559|intergenic_region|ENSMUSG00000043760-ENSMUSG00000065559|||n.20632989G>T||||||	GT:AD:AF:DP:F1R2:F2R1:SB	0/0:31,0:0.032:31:16,0:15,0:21,10,0,0	0/1:19,4:0.201:23:11,2:7,2:16,3,2,2	2985_T1
chr1	20722904	.	CTGTG	C	.	PASS	AS_FilterStatus=SITE;AS_SB_TABLE=7,13|2,1;DP=41;ECNT=1;GERMQ=35;MBQ=28,33;MFRL=469,339;MMQ=60,60;MPOS=43;NALOD=0.901;NLOD=3.20;POPAF=6.00;RPA=23,21;RU=TG;STR;STRQ=93;TLOD=8.33;ANN=C|intergenic_region|MODIFIER|Mir133b-Il17a|ENSMUSG00000065480-ENSMUSG00000025929|intergenic_region|ENSMUSG00000065480-ENSMUSG00000025929|||n.20722905_20722908delTGTG||||||	GT:AD:AF:DP:F1R2:F2R1:SB	0/0:11,0:0.066:11:2,0:6,0:4,7,0,0	0/1:9,3:0.282:12:2,2:0,0:3,6,2,1	2985_T1
chr1	20730825	.	AC	A	.	PASS	AS_FilterStatus=SITE;AS_SB_TABLE=27,26|4,1;DP=66;ECNT=1;GERMQ=93;MBQ=35,35;MFRL=456,461;MMQ=60,60;MPOS=30;NALOD=1.55;NLOD=9.61;POPAF=6.00;RPA=6,5;RU=C;STR;STRQ=93;TLOD=9.76;ANN=A|upstream_gene_variant|MODIFIER|Il17a|ENSMUSG00000025929|transcript|ENSMUST00000027061|protein_coding||c.-136delC|||||79|,A|intergenic_region|MODIFIER|Mir133b-Il17a|ENSMUSG00000065480-ENSMUSG00000025929|intergenic_region|…	GT:AD:AF:DP:F1R2:F2R1:SB	0/0:33,0:0.028:33:12,0:19,0:15,18,0,0	0/1:20,5:0.221:25:11,2:9,3:12,8,4,1	3147_T1
chr1	20744470	.	A	G	.	PASS	AS_FilterStatus=SITE;AS_SB_TABLE=32,28|2,2;DP=66;ECNT=1;GERMQ=93;MBQ=34,35;MFRL=467,396;MMQ=60,60;MPOS=48;NALOD=1.57;NLOD=10.83;POPAF=6.00;TLOD=9.92;ANN=G|intergenic_region|MODIFIER|Il17a-Il17f|ENSMUSG00000025929-ENSMUSG00000041872|intergenic_region|ENSMUSG00000025929-ENSMUSG00000041872|||n.20744470A>G||||||	GT:AD:AF:DP:F1R2:F2R1:SB	0/0:36,0:0.026:36:17,0:19,0:18,18,0,0	0/1:24,4:0.166:28:13,3:11,1:14,10,2,2	2985_T1
chr1	20767716	.	CAA	C	.	PASS	AS_FilterStatus=SITE;AS_SB_TABLE=12,20|3,0;DP=54;ECNT=1;GERMQ=70;MBQ=33,33;MFRL=437,608;MMQ=60,60;MPOS=34;NALOD=1.32;NLOD=4.80;POPAF=6.00;RPA=16,14;RU=A;STR;STRQ=93;TLOD=6.37;ANN=C|intergenic_region|MODIFIER|Il17a-Il17f|ENSMUSG00000025929-ENSMUSG00000041872|intergenic_region|ENSMUSG00000025929-ENSMUSG00000041872|||n.20767717_20767718delAA||||||	GT:AD:AF:DP:F1R2:F2R1:SB	0/0:16,0:0.047:16:8,0:6,0:8,8,0,0	0/1:16,3:0.186:19:2,3:9,0:4,12,3,0	613_T1
chr1	20813265	.	C	T	.	PASS	AS_FilterStatus=SITE;AS_SB_TABLE=26,30|0,3;DP=59;ECNT=1;GERMQ=93;MBQ=29,34;MFRL=438,500;MMQ=60,60;MPOS=12;NALOD=1.38;NLOD=6.87;POPAF=6.00;TLOD=6.36;ANN=T|intron_variant|MODIFIER|Mcm3|ENSMUSG00000041859|transcript|ENSMUST00000053266|protein_coding|6/16|c.880-151G>A||||||	GT:AD:AF:DP:F1R2:F2R1:SB	0/0:24,0:0.040:24:13,0:10,0:12,12,0,0	0/1:32,3:0.114:35:18,1:14,2:14,18,0,3	3147_T1
chr1	20852162	.	GTT	G	.	PASS	AS_FilterStatus=SITE;AS_SB_TABLE=8,19|2,3;DP=46;ECNT=1;GERMQ=48;MBQ=14,32;MFRL=423,354;MMQ=60,60;MPOS=42;NALOD=0.798;NLOD=4.42;POPAF=6.00;RPA=20,18;RU=T;STR;STRQ=93;TLOD=9.28;ANN=G|intergenic_region|MODIFIER|Gm24723-6720483E21Rik|ENSMUSG00000088858-ENSMUSG00000097934|intergenic_region|ENSMUSG00000088858-ENSMUSG00000097934|||n.20852163_20852164delTT||||||	GT:AD:AF:DP:F1R2:F2R1:SB	0/0:15,0:0.048:15:4,0:5,0:6,9,0,0	0/1:12,5:0.314:17:1,1:1,2:2,10,2,3	2985_T1
chr1	20925440	.	CT	C	.	PASS	AS_FilterStatus=SITE;AS_SB_TABLE=16,11|6,6;DP=52;ECNT=1;GERMQ=46;MBQ=33,34;MFRL=487,473;MMQ=60,60;MPOS=32;NALOD=1.36;NLOD=5.38;POPAF=6.00;RPA=16,15;RU=T;STR;STRQ=5;TLOD=20.95;ANN=C|intron_variant|MODIFIER|Paqr8|ENSMUSG00000025931|transcript|ENSMUST00000068880|protein_coding|1/2|c.-222-6604delT||||||INFO_REALIGN_3_PRIME	GT:AD:AF:DP:F1R2:F2R1:SB	0/0:18,0:0.044:18:11,0:5,0:12,6,0,0	0/1:9,12:0.564:21:4,6:4,5:4,5,6,6	3147_T1
chr1	21034748	.	TA	T	.	PASS	AS_FilterStatus=SITE;AS_SB_TABLE=34,37|1,3;DP=79;ECNT=1;GERMQ=93;MBQ=34,34;MFRL=403,386;MMQ=60,60;MPOS=43;NALOD=1.63;NLOD=12.02;POPAF=6.00;RPA=7,6;RU=A;STR;STRQ=93;TLOD=6.18;ANN=T|intron_variant|MODIFIER|Tram2|ENSMUSG00000041779|transcript|ENSMUST00000037998|protein_coding|2/10|c.184+2648delT||||||	GT:AD:AF:DP:F1R2:F2R1:SB	0/0:40,0:0.023:40:16,0:21,0:19,21,0,0	0/1:31,4:0.137:35:19,0:12,4:15,16,1,3	613_T1
chr1	21113643	.	G	T	.	PASS	AS_FilterStatus=SITE;AS_SB_TABLE=24,31|4,3;DP=63;ECNT=1;GERMQ=93;MBQ=34,35;MFRL=450,484;MMQ=60,60;MPOS=33;NALOD=1.54;NLOD=10.19;POPAF=6.00;TLOD=20.40;ANN=T|intergenic_region|MODIFIER|Tram2-Tmem14a|ENSMUSG00000041779-ENSMUSG00000025933|intergenic_region|ENSMUSG00000041779-ENSMUSG00000025933|||n.21113643G>T||||||	GT:AD:AF:DP:F1R2:F2R1:SB	0/0:34,0:0.028:34:15,0:18,0:13,21,0,0	0/1:21,7:0.266:28:8,4:12,3:11,10,4,3	2985_T1
chr1	21210827	.	G	A	.	PASS	AS_FilterStatus=SITE;AS_SB_TABLE=36,38|2,3;DP=81;ECNT=1;GERMQ=93;MBQ=28,20;MFRL=434,211;MMQ=60,60;MPOS=60;NALOD=1.58;NLOD=10.99;POPAF=6.00;TLOD=6.88;ANN=A|intergenic_region|MODIFIER|Tram2-Tmem14a|ENSMUSG00000041779-ENSMUSG00000025933|intergenic_region|ENSMUSG00000041779-ENSMUSG00000025933|||n.21210827G>A||||||	GT:AD:AF:DP:F1R2:F2R1:SB	0/0:41,0:0.026:41:14,0:20,0:21,20,0,0	0/1:33,5:0.108:38:18,3:14,1:15,18,2,3	2985_T1
chr1	21421141	.	GAA	G	.	PASS	AS_FilterStatus=SITE;AS_SB_TABLE=12,12|4,1;DP=43;ECNT=1;GERMQ=42;MBQ=34,34;MFRL=398,406;MMQ=60,60;MPOS=30;NALOD=0.894;NLOD=4.20;POPAF=6.00;RPA=20,18;RU=A;STR;STRQ=93;TLOD=8.56;ANN=G|intron_variant|MODIFIER|Kcnq5|ENSMUSG00000028033|transcript|ENSMUST00000115300|protein_coding|12/14|c.1637+2906_1637+2907delTT||||||	GT:AD:AF:DP:F1R2:F2R1:SB	0/0:14,0:0.051:14:3,0:11,0:6,8,0,0	0/1:10,5:0.351:15:4,1:3,4:6,4,4,1	2985_T1
chr1	21450668	.	T	C	.	PASS	AS_FilterStatus=SITE;AS_SB_TABLE=42,31|5,1;DP=80;ECNT=2;GERMQ=93;MBQ=34,34;MFRL=439,460;MMQ=60,60;MPOS=49;NALOD=1.54;NLOD=9.94;POPAF=6.00;TLOD=12.17;ANN=C|intron_variant|MODIFIER|Kcnq5|ENSMUSG00000028033|transcript|ENSMUST00000115300|protein_coding|11/14|c.1528+6736A>G||||||	GT:AD:AF:DP:F1R2:F2R1:SB	0/0:33,0:0.028:33:17,0:16,0:18,15,0,0	0/1:40,6:0.139:46:15,3:22,2:24,16,5,1	613_T1
chr1	21509762	.	TAA	T	.	PASS	AS_FilterStatus=SITE;AS_SB_TABLE=27,18|4,2;DP=66;ECNT=1;GERMQ=89;MBQ=34,34;MFRL=419,370;MMQ=60,60;MPOS=19;NALOD=1.20;NLOD=7.19;POPAF=6.00;RPA=12,10;RU=A;STR;STRQ=93;TLOD=13.44;ANN=T|downstream_gene_variant|MODIFIER|Gm7658|ENSMUSG00000082935|transcript|ENSMUST00000179051|pseudogene||n.*2106_*2107delTT|||||2107|,T|intron_variant|MODIFIER|Kcnq5|ENSMUSG00000028033|transcript|ENSMUST00000115300|protei…	GT:AD:AF:DP:F1R2:F2R1:SB	0/0:24,0:0.033:24:9,0:13,0:16,8,0,0	0/1:21,6:0.256:27:9,3:8,3:11,10,4,2	2985_T1
chr1	21518464	.	GA	G	.	PASS	AS_FilterStatus=SITE;AS_SB_TABLE=38,29|3,7;DP=82;ECNT=1;GERMQ=93;MBQ=35,32;MFRL=458,450;MMQ=60,60;MPOS=24;NALOD=1.62;NLOD=12.02;POPAF=6.00;RPA=6,5;RU=A;STR;STRQ=93;TLOD=18.45;ANN=G|intron_variant|MODIFIER|Kcnq5|ENSMUSG00000028033|transcript|ENSMUST00000115300|protein_coding|3/14|c.620-12606delT||||||	GT:AD:AF:DP:F1R2:F2R1:SB	0/0:40,0:0.023:40:12,0:27,0:23,17,0,0	0/1:27,10:0.262:37:15,7:12,3:15,12,3,7	613_T1
chr1	21550435	.	TA	T	.	PASS	AS_FilterStatus=SITE;AS_SB_TABLE=28,27|3,2;DP=65;ECNT=1;GERMQ=93;MBQ=35,36;MFRL=420,421;MMQ=60,60;MPOS=41;NALOD=1.55;NLOD=9.30;POPAF=6.00;RPA=6,5;RU=A;STR;STRQ=93;TLOD=9.46;ANN=T|intron_variant|MODIFIER|Kcnq5|ENSMUSG00000028033|transcript|ENSMUST00000115300|protein_coding|2/14|c.493-15249delT||||||	GT:AD:AF:DP:F1R2:F2R1:SB	0/0:32,0:0.028:32:16,0:16,0:18,14,0,0	0/1:23,5:0.199:28:12,4:10,1:10,13,3,2	2985_T1
chr1	21609450	.	T	C	.	PASS	AS_FilterStatus=SITE;AS_SB_TABLE=42,25|2,2;DP=72;ECNT=1;GERMQ=93;MBQ=35,34;MFRL=445,370;MMQ=60,60;MPOS=20;NALOD=1.61;NLOD=12.04;POPAF=6.00;TLOD=7.99;ANN=C|intron_variant|MODIFIER|Kcnq5|ENSMUSG00000028033|transcript|ENSMUST00000115300|protein_coding|1/14|c.402-15836A>G||||||	GT:AD:AF:DP:F1R2:F2R1:SB	0/0:41,0:0.024:41:21,0:20,0:24,17,0,0	0/1:26,4:0.155:30:21,2:4,1:18,8,2,2	3147_T1
chr1	21642941	.	GA	G	.	PASS	AS_FilterStatus=SITE;AS_SB_TABLE=19,21|9,5;DP=67;ECNT=1;GERMQ=66;MBQ=34,36;MFRL=431,445;MMQ=60,60;MPOS=48;NALOD=1.43;NLOD=7.20;POPAF=6.00;RPA=10,9;RU=A;STR;STRQ=3;TLOD=27.75;ANN=G|intron_variant|MODIFIER|Kcnq5|ENSMUSG00000028033|transcript|ENSMUST00000115300|protein_coding|1/14|c.402-49328delT||||||	GT:AD:AF:DP:F1R2:F2R1:SB	0/0:24,0:0.036:24:12,0:11,0:13,11,0,0	0/1:16,14:0.457:30:10,6:6,7:6,10,9,5	613_T1
chr1	21726006	.	ATT	A	.	PASS	AS_FilterStatus=SITE;AS_SB_TABLE=18,6|2,6;DP=41;ECNT=1;GERMQ=52;MBQ=36,34;MFRL=413,443;MMQ=60,60;MPOS=19;NALOD=1.10;NLOD=5.69;POPAF=6.00;RPA=14,12;RU=T;STR;STRQ=93;TLOD=15.80;ANN=A|intron_variant|MODIFIER|Kcnq5|ENSMUSG00000028033|transcript|ENSMUST00000115300|protein_coding|1/14|c.402-132394_402-132393delAA||||||	GT:AD:AF:DP:F1R2:F2R1:SB	0/0:20,0:0.042:20:8,0:11,0:15,5,0,0	0/1:4,8:0.645:12:2,2:1,5:3,1,2,6	2985_T1
chr1	21749428	.	T	C	.	PASS	AS_FilterStatus=SITE;AS_SB_TABLE=26,37|2,1;DP=67;ECNT=1;GERMQ=93;MBQ=35,33;MFRL=438,430;MMQ=60,60;MPOS=59;NALOD=1.48;NLOD=8.73;POPAF=6.00;TLOD=6.12;ANN=C|intron_variant|MODIFIER|Kcnq5|ENSMUSG00000028033|transcript|ENSMUST00000115300|protein_coding|1/14|c.402-155814A>G||||||	GT:AD:AF:DP:F1R2:F2R1:SB	0/0:29,0:0.032:29:12,0:17,0:11,18,0,0	0/1:34,3:0.106:37:17,0:15,3:15,19,2,1	613_T1
chr1	21755835	.	C	T	.	PASS	AS_FilterStatus=SITE;AS_SB_TABLE=25,30|3,4;DP=64;ECNT=1;GERMQ=93;MBQ=36,33;MFRL=454,517;MMQ=60,60;MPOS=47;NALOD=1.48;NLOD=8.73;POPAF=6.00;TLOD=18.89;ANN=T|intron_variant|MODIFIER|Kcnq5|ENSMUSG00000028033|transcript|ENSMUST00000115300|protein_coding|1/14|c.402-162221G>A||||||	GT:AD:AF:DP:F1R2:F2R1:SB	0/0:29,0:0.032:29:17,0:12,0:11,18,0,0	0/1:26,7:0.229:33:15,4:8,3:14,12,3,4	2985_T1
chr1	21859714	.	C	T	.	PASS	AS_FilterStatus=SITE;AS_SB_TABLE=36,35|3,3;DP=77;ECNT=2;GERMQ=93;MBQ=29,34;MFRL=440,294;MMQ=60,60;MPOS=43;NALOD=1.62;NLOD=12.03;POPAF=6.00;TLOD=13.48;ANN=T|intron_variant|MODIFIER|Kcnq5|ENSMUSG00000028033|transcript|ENSMUST00000115300|protein_coding|1/14|c.401+101467G>A||||||	GT:AD:AF:DP:F1R2:F2R1:SB	0/0:41,0:0.023:41:20,0:20,0:22,19,0,0	0/1:30,6:0.166:36:19,4:11,2:14,16,3,3	613_T1
chr1	21889474	.	T	C	.	PASS	AS_FilterStatus=SITE;AS_SB_TABLE=31,39|1,3;DP=75;ECNT=1;GERMQ=93;MBQ=35,36;MFRL=424,380;MMQ=60,60;MPOS=33;NALOD=1.56;NLOD=10.53;POPAF=6.00;TLOD=9.37;ANN=C|intron_variant|MODIFIER|Kcnq5|ENSMUSG00000028033|transcript|ENSMUST00000115300|protein_coding|1/14|c.401+71707A>G||||||	GT:AD:AF:DP:F1R2:F2R1:SB	0/0:35,0:0.027:35:18,0:17,0:19,16,0,0	0/1:35,4:0.122:39:17,2:18,2:12,23,1,3	613_T1
chr1	22016338	.	GTT	G	.	PASS	AS_FilterStatus=SITE;AS_SB_TABLE=24,18|3,2;DP=66;ECNT=1;GERMQ=84;MBQ=36,36;MFRL=456,445;MMQ=60,60;MPOS=29;NALOD=1.14;NLOD=5.82;POPAF=6.00;RPA=16,14;RU=T;STR;STRQ=93;TLOD=9.43;ANN=G|intergenic_region|MODIFIER|Gm26580-Rims1|ENSMUSG00000097109-ENSMUSG00000041670|intergenic_region|ENSMUSG00000097109-ENSMUSG00000041670|||n.22016339_22016340delTT||||||	GT:AD:AF:DP:F1R2:F2R1:SB	0/0:20,0:0.040:20:9,0:5,0:11,9,0,0	0/1:22,5:0.211:27:7,2:10,2:13,9,3,2	613_T1
chr1	22083590	.	TA	T	.	PASS	AS_FilterStatus=SITE;AS_SB_TABLE=18,19|2,3;DP=45;ECNT=1;GERMQ=74;MBQ=34,34;MFRL=458,549;MMQ=40,40;MPOS=46;NALOD=1.31;NLOD=5.41;POPAF=6.00;RPA=6,5;RU=A;STR;STRQ=93;TLOD=9.88;ANN=T|intergenic_region|MODIFIER|Gm26580-Rims1|ENSMUSG00000097109-ENSMUSG00000041670|intergenic_region|ENSMUSG00000097109-ENSMUSG00000041670|||n.22083591delA||||||	GT:AD:AF:DP:F1R2:F2R1:SB	0/0:18,0:0.047:18:9,0:8,0:8,10,0,0	0/1:19,5:0.230:24:12,1:7,4:10,9,2,3	613_T1
chr1	22101469	.	CAGAG	C	.	PASS	AS_FilterStatus=SITE;AS_SB_TABLE=12,10|1,3;DP=40;ECNT=1;GERMQ=38;MBQ=32,35;MFRL=447,435;MMQ=60,60;MPOS=40;NALOD=0.584;NLOD=3.28;POPAF=6.00;RPA=22,20;RU=AG;STR;STRQ=93;TLOD=5.60;ANN=C|intergenic_region|MODIFIER|Gm26580-Rims1|ENSMUSG00000097109-ENSMUSG00000041670|intergenic_region|ENSMUSG00000097109-ENSMUSG00000041670|||n.22101470_22101473delAGAG||||||	GT:AD:AF:DP:F1R2:F2R1:SB	0/0:11,0:0.063:11:7,0:1,0:5,6,0,0	0/1:11,4:0.287:15:7,1:3,1:7,4,1,3	613_T1
chr1	22107278	.	CT	C	.	PASS	AS_FilterStatus=SITE;AS_SB_TABLE=25,44|3,2;DP=77;ECNT=1;GERMQ=93;MBQ=35,33;MFRL=462,379;MMQ=60,60;MPOS=43;NALOD=1.64;NLOD=12.32;POPAF=6.00;RPA=7,6;RU=T;STR;STRQ=93;TLOD=8.84;ANN=C|intergenic_region|MODIFIER|Gm26580-Rims1|ENSMUSG00000097109-ENSMUSG00000041670|intergenic_region|ENSMUSG00000097109-ENSMUSG00000041670|||n.22107279delT||||||	GT:AD:AF:DP:F1R2:F2R1:SB	0/0:43,0:0.022:43:23,0:18,0:14,29,0,0	0/1:26,5:0.181:31:18,3:8,2:11,15,3,2	613_T1
chr1	22124733	.	AC	A	.	PASS	AS_FilterStatus=SITE;AS_SB_TABLE=25,30|5,3;DP=67;ECNT=1;GERMQ=93;MBQ=35,35;MFRL=437,428;MMQ=60,60;MPOS=26;NALOD=1.53;NLOD=9.32;POPAF=6.00;RPA=5,4;RU=C;STR;STRQ=93;TLOD=14.36;ANN=A|intergenic_region|MODIFIER|Gm26580-Rims1|ENSMUSG00000097109-ENSMUSG00000041670|intergenic_region|ENSMUSG00000097109-ENSMUSG00000041670|||n.22124734delC||||||	GT:AD:AF:DP:F1R2:F2R1:SB	0/0:31,0:0.029:31:17,0:14,0:14,17,0,0	0/1:24,8:0.242:32:8,5:16,3:11,13,5,3	2985_T1
chr1	22125107	.	C	T	.	PASS	AS_FilterStatus=SITE;AS_SB_TABLE=25,33|2,1;DP=62;ECNT=1;GERMQ=93;MBQ=34,37;MFRL=461,418;MMQ=60,60;MPOS=25;NALOD=1.58;NLOD=10.99;POPAF=6.00;TLOD=7.45;ANN=T|intergenic_region|MODIFIER|Gm26580-Rims1|ENSMUSG00000097109-ENSMUSG00000041670|intergenic_region|ENSMUSG00000097109-ENSMUSG00000041670|||n.22125107C>T||||||	GT:AD:AF:DP:F1R2:F2R1:SB	0/0:37,0:0.026:37:17,0:15,0:14,23,0,0	0/1:21,3:0.156:24:12,3:6,0:11,10,2,1	3147_T1
chr1	22141014	.	CTT	C	.	PASS	AS_FilterStatus=SITE;AS_SB_TABLE=13,12|1,3;DP=38;ECNT=1;GERMQ=43;MBQ=33,29;MFRL=410,346;MMQ=60,60;MPOS=51;NALOD=0.942;NLOD=3.89;POPAF=6.00;RPA=17,15;RU=T;STR;STRQ=93;TLOD=6.56;ANN=C|intergenic_region|MODIFIER|Gm26580-Rims1|ENSMUSG00000097109-ENSMUSG00000041670|intergenic_region|ENSMUSG00000097109-ENSMUSG00000041670|||n.22141015_22141016delTT||||||	GT:AD:AF:DP:F1R2:F2R1:SB	0/0:14,0:0.058:14:6,0:6,0:8,6,0,0	0/1:11,4:0.287:15:4,4:4,0:5,6,1,3	3147_T1
chr1	22178585	.	T	C	.	PASS	AS_FilterStatus=SITE;AS_SB_TABLE=36,37|1,4;DP=78;ECNT=1;GERMQ=93;MBQ=35,27;MFRL=430,393;MMQ=60,60;MPOS=32;NALOD=1.63;NLOD=12.59;POPAF=6.00;TLOD=8.38;ANN=C|intergenic_region|MODIFIER|Gm26580-Rims1|ENSMUSG00000097109-ENSMUSG00000041670|intergenic_region|ENSMUSG00000097109-ENSMUSG00000041670|||n.22178585T>C||||||	GT:AD:AF:DP:F1R2:F2R1:SB	0/0:42,0:0.023:42:16,0:24,0:19,23,0,0	0/1:31,5:0.135:36:10,2:21,3:17,14,1,4	613_T1
chr1	22190326	.	AT	A	.	PASS	AS_FilterStatus=SITE;AS_SB_TABLE=35,26|2,2;DP=69;ECNT=1;GERMQ=93;MBQ=35,35;MFRL=452,457;MMQ=60,60;MPOS=35;NALOD=1.51;NLOD=9.01;POPAF=6.00;RPA=7,6;RU=T;STR;STRQ=93;TLOD=6.19;ANN=A|intergenic_region|MODIFIER|Gm26580-Rims1|ENSMUSG00000097109-ENSMUSG00000041670|intergenic_region|ENSMUSG00000097109-ENSMUSG00000041670|||n.22190327delT||||||	GT:AD:AF:DP:F1R2:F2R1:SB	0/0:30,0:0.030:30:13,0:16,0:19,11,0,0	0/1:31,4:0.134:35:12,4:17,0:16,15,2,2	613_T1
chr1	22199310	.	CT	C	.	PASS	AS_FilterStatus=SITE;AS_SB_TABLE=50,31|4,4;DP=96;ECNT=1;GERMQ=93;MBQ=33,33;MFRL=440,431;MMQ=60,60;MPOS=50;NALOD=1.68;NLOD=13.21;POPAF=6.00;RPA=7,6;RU=T;STR;STRQ=93;TLOD=13.59;ANN=C|intergenic_region|MODIFIER|Gm26580-Rims1|ENSMUSG00000097109-ENSMUSG00000041670|intergenic_region|ENSMUSG00000097109-ENSMUSG00000041670|||n.22199311delT||||||	GT:AD:AF:DP:F1R2:F2R1:SB	0/0:45,0:0.021:45:19,0:24,0:28,17,0,0	0/1:36,8:0.193:44:15,3:21,5:22,14,4,4	613_T1
chr1	22240224	.	GT	G	.	PASS	AS_FilterStatus=SITE;AS_SB_TABLE=36,25|5,6;DP=79;ECNT=1;GERMQ=93;MBQ=36,33;MFRL=470,444;MMQ=60,60;MPOS=31;NALOD=1.62;NLOD=11.42;POPAF=6.00;RPA=6,5;RU=T;STR;STRQ=93;TLOD=25.11;ANN=G|intergenic_region|MODIFIER|Gm26580-Rims1|ENSMUSG00000097109-ENSMUSG00000041670|intergenic_region|ENSMUSG00000097109-ENSMUSG00000041670|||n.22240225delT||||||	GT:AD:AF:DP:F1R2:F2R1:SB	0/0:38,0:0.024:38:18,0:19,0:26,12,0,0	0/1:23,11:0.333:34:12,5:11,6:10,13,5,6	2985_T1
chr1	22255629	.	CAA	C	.	PASS	AS_FilterStatus=SITE;AS_SB_TABLE=13,37|3,4;DP=74;ECNT=1;GERMQ=93;MBQ=36,33;MFRL=438,403;MMQ=60,60;MPOS=42;NALOD=1.34;NLOD=11.12;POPAF=6.00;RPA=16,14;RU=A;STR;STRQ=93;TLOD=15.11;ANN=C|intergenic_region|MODIFIER|Gm26580-Rims1|ENSMUSG00000097109-ENSMUSG00000041670|intergenic_region|ENSMUSG00000097109-ENSMUSG00000041670|||n.22255630_22255631delAA||||||	GT:AD:AF:DP:F1R2:F2R1:SB	0/0:37,0:0.023:37:13,0:21,0:9,28,0,0	0/1:13,7:0.362:20:8,3:4,4:4,9,3,4	613_T1
chr1	22269306	.	CT	C	.	PASS	AS_FilterStatus=SITE;AS_SB_TABLE=37,39|3,4;DP=84;ECNT=1;GERMQ=93;MBQ=34,36;MFRL=447,376;MMQ=60,60;MPOS=49;NALOD=1.60;NLOD=11.43;POPAF=6.00;RPA=6,5;RU=T;STR;STRQ=93;TLOD=12.98;ANN=C|intergenic_region|MODIFIER|Gm26580-Rims1|ENSMUSG00000097109-ENSMUSG00000041670|intergenic_region|ENSMUSG00000097109-ENSMUSG00000041670|||n.22269307delT||||||	GT:AD:AF:DP:F1R2:F2R1:SB	0/0:38,0:0.025:38:16,0:22,0:20,18,0,0	0/1:38,7:0.170:45:20,4:18,3:17,21,3,4	613_T1
chr1	22318330	.	TA	T	.	PASS	AS_FilterStatus=SITE;AS_SB_TABLE=36,23|3,3;DP=69;ECNT=1;GERMQ=93;MBQ=36,35;MFRL=420,546;MMQ=60,60;MPOS=23;NALOD=1.49;NLOD=8.41;POPAF=6.00;RPA=5,4;RU=A;STR;STRQ=93;TLOD=11.67;ANN=T|intron_variant|MODIFIER|Rims1|ENSMUSG00000041670|transcript|ENSMUST00000097811|protein_coding|32/36|c.3563-21335delT||||||	GT:AD:AF:DP:F1R2:F2R1:SB	0/0:28,0:0.032:28:11,0:14,0:19,9,0,0	0/1:31,6:0.179:37:17,3:14,3:17,14,3,3	613_T1
chr1	22319040	.	TACAC	T	.	PASS	AS_FilterStatus=SITE;AS_SB_TABLE=17,7|2,1;DP=41;ECNT=1;GERMQ=44;MBQ=34,35;MFRL=480,517;MMQ=60,60;MPOS=57;NALOD=1.03;NLOD=4.13;POPAF=6.00;RPA=23,21;RU=AC;STR;STRQ=93;TLOD=7.01;ANN=T|intron_variant|MODIFIER|Rims1|ENSMUSG00000041670|transcript|ENSMUST00000097811|protein_coding|32/36|c.3563-22048_3563-22045delGTGT||||||	GT:AD:AF:DP:F1R2:F2R1:SB	0/0:14,0:0.051:14:7,0:5,0:9,5,0,0	0/1:10,3:0.264:13:3,2:6,1:8,2,2,1	3147_T1
chr1	22337937	.	T	C	.	PASS	AS_FilterStatus=SITE;AS_SB_TABLE=39,35|2,3;DP=82;ECNT=1;GERMQ=93;MBQ=34,34;MFRL=453,470;MMQ=60,60;MPOS=59;NALOD=1.56;NLOD=10.53;POPAF=6.00;TLOD=11.59;ANN=C|intron_variant|MODIFIER|Rims1|ENSMUSG00000041670|transcript|ENSMUST00000097811|protein_coding|32/36|c.3562+8356A>G||||||	GT:AD:AF:DP:F1R2:F2R1:SB	0/0:35,0:0.027:35:19,0:16,0:21,14,0,0	0/1:39,5:0.130:44:13,2:26,3:18,21,2,3	613_T1
chr1	22380843	.	G	A	.	PASS	AS_FilterStatus=SITE;AS_SB_TABLE=28,25|3,3;DP=64;ECNT=1;GERMQ=93;MBQ=29,34;MFRL=409,434;MMQ=60,60;MPOS=38;NALOD=1.48;NLOD=8.68;POPAF=6.00;TLOD=13.64;ANN=A|intron_variant|MODIFIER|Rims1|ENSMUSG00000041670|transcript|ENSMUST00000097811|protein_coding|29/36|c.3047-1303C>T||||||	GT:AD:AF:DP:F1R2:F2R1:SB	0/0:31,0:0.032:31:12,0:18,0:15,16,0,0	0/1:22,6:0.231:28:15,4:7,1:13,9,3,3	3147_T1
chr1	22396529	.	ACC	A	.	PASS	AS_FilterStatus=SITE;AS_SB_TABLE=23,15|5,5;DP=54;ECNT=1;GERMQ=51;MBQ=34,34;MFRL=425,413;MMQ=60,60;MPOS=33;NALOD=1.27;NLOD=4.51;POPAF=6.00;RPA=10,8;RU=C;STR;STRQ=93;TLOD=30.72;ANN=A|intron_variant|MODIFIER|Rims1|ENSMUSG00000041670|transcript|ENSMUST00000097811|protein_coding|29/36|c.3046+920_3046+921delGG||||||	GT:AD:AF:DP:F1R2:F2R1:SB	0/0:15,0:0.053:15:5,0:9,0:11,4,0,0	0/1:23,10:0.324:33:14,8:9,2:12,11,5,5	613_T1
chr1	22492172	.	A	G	.	PASS	AS_FilterStatus=SITE;AS_SB_TABLE=37,22|4,1;DP=68;ECNT=1;GERMQ=93;MBQ=34,37;MFRL=417,544;MMQ=60,60;MPOS=31;NALOD=1.41;NLOD=7.22;POPAF=6.00;TLOD=12.85;ANN=G|intron_variant|MODIFIER|Rims1|ENSMUSG00000041670|transcript|ENSMUST00000097811|protein_coding|9/36|c.1187-5520T>C||||||	GT:AD:AF:DP:F1R2:F2R1:SB	0/0:24,0:0.037:24:14,0:10,0:17,7,0,0	0/1:35,5:0.143:40:18,3:17,2:20,15,4,1	613_T1
chr1	22599832	.	TTCTCTC	T	.	PASS	AS_FilterStatus=SITE;AS_SB_TABLE=12,13|1,3;DP=40;ECNT=1;GERMQ=37;MBQ=34,35;MFRL=413,468;MMQ=60,60;MPOS=60;NALOD=0.906;NLOD=5.06;POPAF=6.00;RPA=19,16;RU=TC;STR;STRQ=93;TLOD=13.28;ANN=T|intron_variant|MODIFIER|Rims1|ENSMUSG00000041670|transcript|ENSMUST00000097811|protein_coding|3/36|c.315-3254_315-3249delGAGAGA||||||	GT:AD:AF:DP:F1R2:F2R1:SB	0/0:17,0:0.045:17:8,0:6,0:8,9,0,0	0/1:8,4:0.357:12:1,2:6,2:4,4,1,3	3147_T1
chr1	22652654	.	TGG	T	.	PASS	AS_FilterStatus=SITE;AS_SB_TABLE=30,6|4,3;DP=51;ECNT=1;GERMQ=66;MBQ=34,35;MFRL=436,398;MMQ=60,60;MPOS=30;NALOD=0.989;NLOD=6.33;POPAF=6.00;RPA=12,10;RU=G;STR;STRQ=93;TLOD=15.33;ANN=T|intron_variant|MODIFIER|Rims1|ENSMUSG00000041670|transcript|ENSMUST00000097811|protein_coding|2/36|c.246-22176_246-22175delCC||||||	GT:AD:AF:DP:F1R2:F2R1:SB	0/0:21,0:0.038:21:13,0:6,0:17,4,0,0	0/1:15,7:0.332:22:9,2:6,5:13,2,4,3	613_T1
chr1	22671624	.	G	A	.	PASS	AS_FilterStatus=SITE;AS_SB_TABLE=25,29|1,6;DP=63;ECNT=1;GERMQ=93;MBQ=33,35;MFRL=419,426;MMQ=60,60;MPOS=60;NALOD=1.51;NLOD=9.28;POPAF=6.00;TLOD=20.13;ANN=A|intron_variant|MODIFIER|Rims1|ENSMUSG00000041670|transcript|ENSMUST00000097811|protein_coding|2/36|c.246-41144C>T||||||	GT:AD:AF:DP:F1R2:F2R1:SB	0/0:31,0:0.030:31:17,0:12,0:15,16,0,0	0/1:23,7:0.250:30:11,4:12,3:10,13,1,6	2985_T1
chr1	22715457	.	A	G	.	PASS	AS_FilterStatus=SITE;AS_SB_TABLE=47,30|3,0;DP=81;ECNT=1;GERMQ=93;MBQ=36,36;MFRL=445,432;MMQ=60,60;MPOS=41;NALOD=1.54;NLOD=9.89;POPAF=6.00;TLOD=6.28;ANN=G|intron_variant|MODIFIER|Rims1|ENSMUSG00000041670|transcript|ENSMUST00000097811|protein_coding|2/36|c.245+11473T>C||||||	GT:AD:AF:DP:F1R2:F2R1:SB	0/0:34,0:0.028:34:16,0:17,0:23,11,0,0	0/1:43,3:0.083:46:22,1:21,2:24,19,3,0	613_T1
chr1	22738315	.	AT	A	.	PASS	AS_FilterStatus=SITE;AS_SB_TABLE=32,22|5,2;DP=67;ECNT=1;GERMQ=93;MBQ=34,33;MFRL=447,552;MMQ=60,60;MPOS=31;NALOD=1.43;NLOD=7.21;POPAF=6.00;RPA=6,5;RU=T;STR;STRQ=93;TLOD=13.79;ANN=A|upstream_gene_variant|MODIFIER|Gm26866|ENSMUSG00000097642|transcript|ENSMUST00000180414|processed_pseudogene||n.-2448delT|||||2448|,A|intron_variant|MODIFIER|Rims1|ENSMUSG00000041670|transcript|ENSMUST00000097811|protei…	GT:AD:AF:DP:F1R2:F2R1:SB	0/0:24,0:0.036:24:12,0:12,0:15,9,0,0	0/1:30,7:0.204:37:18,2:12,5:17,13,5,2	613_T1
chr1	22763762	.	CTT	C	.	PASS	AS_FilterStatus=SITE;AS_SB_TABLE=18,20|1,2;DP=50;ECNT=1;GERMQ=83;MBQ=34,36;MFRL=464,413;MMQ=60,60;MPOS=58;NALOD=1.01;NLOD=4.50;POPAF=6.00;RPA=13,11;RU=T;STR;STRQ=93;TLOD=5.94;ANN=C|intron_variant|MODIFIER|Rims1|ENSMUSG00000041670|transcript|ENSMUST00000097811|protein_coding|1/36|c.165-36754_165-36753delAA||||||	GT:AD:AF:DP:F1R2:F2R1:SB	0/0:15,0:0.052:15:5,0:9,0:8,7,0,0	0/1:23,3:0.140:26:10,2:7,1:10,13,1,2	613_T1
chr1	22801795	.	G	T	.	PASS	AS_FilterStatus=SITE;AS_SB_TABLE=26,33|1,4;DP=64;ECNT=1;GERMQ=93;MBQ=34,33;MFRL=422,462;MMQ=60,60;MPOS=60;NALOD=1.56;NLOD=10.49;POPAF=6.00;TLOD=12.93;ANN=T|intron_variant|MODIFIER|Rims1|ENSMUSG00000041670|transcript|ENSMUST00000097811|protein_coding|1/36|c.164+3766C>A||||||	GT:AD:AF:DP:F1R2:F2R1:SB	0/0:37,0:0.027:37:15,0:20,0:14,23,0,0	0/1:22,5:0.207:27:10,4:12,1:12,10,1,4	3147_T1
chr1	22815965	.	C	T	.	PASS	AS_FilterStatus=SITE;AS_SB_TABLE=36,33|1,3;DP=74;ECNT=1;GERMQ=93;MBQ=34,35;MFRL=456,494;MMQ=48,55;MPOS=23;NALOD=1.57;NLOD=10.74;POPAF=6.00;TLOD=8.31;ANN=T|intergenic_region|MODIFIER|Rims1-4933415F23Rik|ENSMUSG00000041670-ENSMUSG00000073730|intergenic_region|ENSMUSG00000041670-ENSMUSG00000073730|||n.22815965C>T||||||	GT:AD:AF:DP:F1R2:F2R1:SB	0/0:36,0:0.026:36:16,0:17,0:19,17,0,0	0/1:33,4:0.128:37:17,3:16,1:17,16,1,3	613_T1
chr1	22840878	.	G	T	.	PASS	AS_FilterStatus=SITE;AS_SB_TABLE=38,37|3,3;DP=82;ECNT=1;GERMQ=93;MBQ=34,35;MFRL=446,487;MMQ=60,60;MPOS=44;NALOD=1.65;NLOD=12.75;POPAF=6.00;TLOD=15.65;ANN=T|intergenic_region|MODIFIER|Rims1-4933415F23Rik|ENSMUSG00000041670-ENSMUSG00000073730|intergenic_region|ENSMUSG00000041670-ENSMUSG00000073730|||n.22840878G>T||||||	GT:AD:AF:DP:F1R2:F2R1:SB	0/0:43,0:0.022:43:19,0:18,0:21,22,0,0	0/1:32,6:0.176:38:13,2:16,4:17,15,3,3	613_T1
chr1	22843631	.	T	TTGTG	.	PASS	AS_FilterStatus=SITE;AS_SB_TABLE=15,25|1,2;DP=64;ECNT=1;GERMQ=83;MBQ=34,35;MFRL=431,494;MMQ=60,60;MPOS=35;NALOD=1.49;NLOD=7.01;POPAF=6.00;RPA=16,18;RU=TG;STR;STRQ=93;TLOD=7.41;ANN=TTGTG|intergenic_region|MODIFIER|Rims1-4933415F23Rik|ENSMUSG00000041670-ENSMUSG00000073730|intergenic_region|ENSMUSG00000041670-ENSMUSG00000073730|||n.22843631_22843632insTGTG||||||	GT:AD:AF:DP:F1R2:F2R1:SB	0/0:23,0:0.033:23:14,0:7,0:10,13,0,0	0/1:17,3:0.173:20:10,1:5,1:5,12,1,2	613_T1
chr1	22856388	.	AC	A	.	PASS	AS_FilterStatus=SITE;AS_SB_TABLE=28,27|3,3;DP=65;ECNT=1;GERMQ=93;MBQ=35,35;MFRL=451,453;MMQ=60,60;MPOS=26;NALOD=1.51;NLOD=9.01;POPAF=6.00;RPA=7,6;RU=C;STR;STRQ=93;TLOD=11.23;ANN=A|intergenic_region|MODIFIER|Rims1-4933415F23Rik|ENSMUSG00000041670-ENSMUSG00000073730|intergenic_region|ENSMUSG00000041670-ENSMUSG00000073730|||n.22856389delC||||||	GT:AD:AF:DP:F1R2:F2R1:SB	0/0:30,0:0.030:30:14,0:16,0:18,12,0,0	0/1:25,6:0.211:31:11,3:12,3:10,15,3,3	2985_T1
chr1	22858359	.	AT	A	.	PASS	AS_FilterStatus=SITE;AS_SB_TABLE=23,37|3,5;DP=71;ECNT=1;GERMQ=93;MBQ=34,34;MFRL=444,429;MMQ=60,60;MPOS=41;NALOD=1.53;NLOD=9.32;POPAF=6.00;RPA=5,4;RU=T;STR;STRQ=93;TLOD=17.09;ANN=A|intergenic_region|MODIFIER|Rims1-4933415F23Rik|ENSMUSG00000041670-ENSMUSG00000073730|intergenic_region|ENSMUSG00000041670-ENSMUSG00000073730|||n.22858360delT||||||	GT:AD:AF:DP:F1R2:F2R1:SB	0/0:32,0:0.029:32:21,0:11,0:14,18,0,0	0/1:28,8:0.236:36:15,5:12,2:9,19,3,5	2985_T1
chr1	22859918	.	G	A	.	PASS	AS_FilterStatus=SITE;AS_SB_TABLE=20,27|4,1;DP=54;ECNT=1;GERMQ=93;MBQ=32,34;MFRL=449,466;MMQ=60,60;MPOS=63;NALOD=1.10;NLOD=6.62;POPAF=6.00;TLOD=10.44;ANN=A|intergenic_region|MODIFIER|Rims1-4933415F23Rik|ENSMUSG00000041670-ENSMUSG00000073730|intergenic_region|ENSMUSG00000041670-ENSMUSG00000073730|||n.22859918G>A||||||	GT:AD:AF:DP:F1R2:F2R1:SB	0/0:22,0:0.040:22:13,0:9,0:10,12,0,0	0/1:25,5:0.181:30:14,2:9,2:10,15,4,1	3147_T1
chr1	22908108	.	C	T	.	PASS	AS_FilterStatus=SITE;AS_SB_TABLE=31,18|0,3;DP=52;ECNT=1;GERMQ=93;MBQ=33,33;MFRL=441,470;MMQ=60,60;MPOS=17;NALOD=1.46;NLOD=8.38;POPAF=6.00;TLOD=6.63;ANN=T|intergenic_region|MODIFIER|Rims1-4933415F23Rik|ENSMUSG00000041670-ENSMUSG00000073730|intergenic_region|ENSMUSG00000041670-ENSMUSG00000073730|||n.22908108C>T||||||	GT:AD:AF:DP:F1R2:F2R1:SB	0/0:28,0:0.033:28:13,0:12,0:20,8,0,0	0/1:21,3:0.154:24:12,2:9,1:11,10,0,3	3147_T1
chr1	23006797	.	T	G	.	PASS	AS_FilterStatus=SITE;AS_SB_TABLE=30,32|3,5;DP=72;ECNT=1;GERMQ=93;MBQ=35,34;MFRL=458,390;MMQ=60,60;MPOS=25;NALOD=1.54;NLOD=9.93;POPAF=6.00;TLOD=19.39;ANN=G|intergenic_region|MODIFIER|Rims1-4933415F23Rik|ENSMUSG00000041670-ENSMUSG00000073730|intergenic_region|ENSMUSG00000041670-ENSMUSG00000073730|||n.23006797T>G||||||	GT:AD:AF:DP:F1R2:F2R1:SB	0/0:33,0:0.028:33:19,0:14,0:16,17,0,0	0/1:29,8:0.230:37:14,1:14,6:14,15,3,5	613_T1
chr1	23104479	.	G	A	.	PASS	AS_FilterStatus=SITE;AS_SB_TABLE=16,9|1,3;DP=35;ECNT=1;GERMQ=45;MBQ=35,36;MFRL=461,280;MMQ=60,60;MPOS=13;NALOD=1.18;NLOD=3.87;POPAF=6.00;TLOD=6.47;ANN=A|upstream_gene_variant|MODIFIER|4933415F23Rik|ENSMUSG00000073730|transcript|ENSMUST00000073179|protein_coding||c.-2248C>T|||||2226|,A|intergenic_region|MODIFIER|4933415F23Rik-Gm24176|ENSMUSG00000073730-ENSMUSG00000089553|intergenic_region|ENSMUSG0…	GT:AD:AF:DP:F1R2:F2R1:SB	0/0:13,0:0.062:13:11,0:1,0:8,5,0,0	0/1:12,4:0.236:16:8,4:3,0:8,4,1,3	613_T1
chr1	23122461	.	C	T	.	PASS	AS_FilterStatus=SITE;AS_SB_TABLE=25,19|2,1;DP=49;ECNT=2;GERMQ=93;MBQ=32,34;MFRL=436,543;MMQ=60,60;MPOS=63;NALOD=1.27;NLOD=5.12;POPAF=6.00;TLOD=6.37;ANN=T|intergenic_region|MODIFIER|4933415F23Rik-Gm24176|ENSMUSG00000073730-ENSMUSG00000089553|intergenic_region|ENSMUSG00000073730-ENSMUSG00000089553|||n.23122461C>T||||||	GT:AD:AF:DP:F1R2:F2R1:SB	0/0:17,0:0.052:17:10,0:7,0:6,11,0,0	0/1:27,3:0.128:30:17,2:10,1:19,8,2,1	613_T1
chr1	23131169	.	GTTT	G	.	PASS	AS_FilterStatus=SITE;AS_SB_TABLE=26,30|4,2;DP=72;ECNT=1;GERMQ=93;MBQ=32,36;MFRL=426,404;MMQ=60,60;MPOS=26;NALOD=1.55;NLOD=9.52;POPAF=6.00;RPA=14,11;RU=T;STR;STRQ=93;TLOD=16.33;ANN=G|intergenic_region|MODIFIER|4933415F23Rik-Gm24176|ENSMUSG00000073730-ENSMUSG00000089553|intergenic_region|ENSMUSG00000073730-ENSMUSG00000089553|||n.23131170_23131172delTTT||||||	GT:AD:AF:DP:F1R2:F2R1:SB	0/0:32,0:0.028:32:8,0:13,0:12,20,0,0	0/1:24,6:0.210:30:12,0:6,4:14,10,4,2	613_T1
chr1	23246001	.	TG	T	.	PASS	AS_FilterStatus=SITE;AS_SB_TABLE=28,22|5,0;DP=57;ECNT=1;GERMQ=93;MBQ=35,36;MFRL=452,371;MMQ=60,60;MPOS=53;NALOD=1.48;NLOD=8.42;POPAF=6.00;RPA=5,4;RU=G;STR;STRQ=93;TLOD=9.97;ANN=T|downstream_gene_variant|MODIFIER|Gm24176|ENSMUSG00000089553|transcript|ENSMUST00000158928|snoRNA||n.*671delG|||||671|,T|intergenic_region|MODIFIER|Gm24176-Gm6420|ENSMUSG00000089553-ENSMUSG00000073729|intergenic_region|EN…	GT:AD:AF:DP:F1R2:F2R1:SB	0/0:28,0:0.032:28:17,0:11,0:14,14,0,0	0/1:22,5:0.206:27:11,5:11,0:14,8,5,0	2985_T1
chr1	23333038	.	TA	T	.	PASS	AS_FilterStatus=SITE;AS_SB_TABLE=5,16|4,7;DP=48;ECNT=1;GERMQ=34;MBQ=33,34;MFRL=416,467;MMQ=60,60;MPOS=54;NALOD=0.972;NLOD=4.15;POPAF=6.00;RPA=20,19;RU=A;STR;STRQ=5;TLOD=12.78;ANN=T|intergenic_region|MODIFIER|Gm27028-Ogfrl1|ENSMUSG00000097970-ENSMUSG00000026158|intergenic_region|ENSMUSG00000097970-ENSMUSG00000026158|||n.23333039delA||||||	GT:AD:AF:DP:F1R2:F2R1:SB	0/0:14,0:0.054:14:5,0:5,0:2,12,0,0	0/1:7,11:0.598:18:4,3:2,6:3,4,4,7	613_T1
chr1	23333038	.	TAA	T	.	PASS	AS_FilterStatus=SITE;AS_SB_TABLE=7,12|4,4;DP=38;ECNT=1;GERMQ=32;MBQ=34,34;MFRL=412,482;MMQ=60,60;MPOS=36;NALOD=0.794;NLOD=3.90;POPAF=6.00;RPA=20,18;RU=A;STR;STRQ=93;TLOD=10.30;ANN=T|intergenic_region|MODIFIER|Gm27028-Ogfrl1|ENSMUSG00000097970-ENSMUSG00000026158|intergenic_region|ENSMUSG00000097970-ENSMUSG00000026158|||n.23333039_23333040delAA||||||	GT:AD:AF:DP:F1R2:F2R1:SB	0/0:13,0:0.060:13:8,0:4,0:5,8,0,0	0/1:6,8:0.562:14:4,4:1,2:2,4,4,4	3147_T1
chr1	23333561	.	G	T	.	PASS	AS_FilterStatus=SITE;AS_SB_TABLE=29,22|5,4;DP=61;ECNT=1;GERMQ=93;MBQ=35,34;MFRL=449,466;MMQ=60,60;MPOS=47;NALOD=1.48;NLOD=8.68;POPAF=6.00;TLOD=26.18;ANN=T|intergenic_region|MODIFIER|Gm27028-Ogfrl1|ENSMUSG00000097970-ENSMUSG00000026158|intergenic_region|ENSMUSG00000097970-ENSMUSG00000026158|||n.23333561G>T||||||	GT:AD:AF:DP:F1R2:F2R1:SB	0/0:29,0:0.032:29:19,0:9,0:19,10,0,0	0/1:22,9:0.303:31:10,5:12,4:10,12,5,4	2985_T1
chr1	23374710	.	TA	T	.	PASS	AS_FilterStatus=SITE;AS_SB_TABLE=30,28|3,2;DP=67;ECNT=2;GERMQ=93;MBQ=34,33;MFRL=450,389;MMQ=60,60;MPOS=25;NALOD=1.56;NLOD=9.91;POPAF=6.00;RPA=7,6;RU=A;STR;STRQ=93;TLOD=8.98;ANN=T|intron_variant|MODIFIER|Ogfrl1|ENSMUSG00000026158|transcript|ENSMUST00000027343|protein_coding|6/6|c.695+1019delT||||||	GT:AD:AF:DP:F1R2:F2R1:SB	0/0:34,0:0.027:34:14,0:17,0:18,16,0,0	0/1:24,5:0.192:29:10,0:12,3:12,12,3,2	613_T1
chr1	23391838	.	G	A	.	PASS	AS_FilterStatus=SITE;AS_SB_TABLE=51,26|2,2;DP=81;ECNT=1;GERMQ=93;MBQ=36,34;MFRL=448,372;MMQ=60,60;MPOS=16;NALOD=1.57;NLOD=10.83;POPAF=6.00;TLOD=8.68;ANN=A|intergenic_region|MODIFIER|Ogfrl1-Gm7784|ENSMUSG00000026158-ENSMUSG00000097920|intergenic_region|ENSMUSG00000026158-ENSMUSG00000097920|||n.23391838G>A||||||	GT:AD:AF:DP:F1R2:F2R1:SB	0/0:37,0:0.026:37:18,0:19,0:28,9,0,0	0/1:40,4:0.111:44:20,2:20,2:23,17,2,2	613_T1
chr1	23422430	.	C	CTATTAT	.	PASS	AS_FilterStatus=SITE;AS_SB_TABLE=23,17|1,3;DP=67;ECNT=1;GERMQ=62;MBQ=34,36;MFRL=461,508;MMQ=60,60;MPOS=53;NALOD=1.03;NLOD=4.09;POPAF=6.00;RPA=12,14;RU=TAT;STR;STRQ=93;TLOD=11.19;ANN=CTATTAT|intergenic_region|MODIFIER|Ogfrl1-Gm7784|ENSMUSG00000026158-ENSMUSG00000097920|intergenic_region|ENSMUSG00000026158-ENSMUSG00000097920|||n.23422430_23422431insTATTAT||||||	GT:AD:AF:DP:F1R2:F2R1:SB	0/0:14,0:0.051:14:6,0:8,0:9,5,0,0	0/1:26,4:0.154:30:9,1:17,2:14,12,1,3	613_T1
chr1	23425043	.	C	A	.	PASS	AS_FilterStatus=SITE;AS_SB_TABLE=29,26|2,2;DP=61;ECNT=1;GERMQ=93;MBQ=34,34;MFRL=484,366;MMQ=60,60;MPOS=19;NALOD=1.59;NLOD=11.39;POPAF=6.00;TLOD=10.58;ANN=A|intergenic_region|MODIFIER|Ogfrl1-Gm7784|ENSMUSG00000026158-ENSMUSG00000097920|intergenic_region|ENSMUSG00000026158-ENSMUSG00000097920|||n.23425043C>A||||||	GT:AD:AF:DP:F1R2:F2R1:SB	0/0:38,0:0.025:38:25,0:12,0:16,22,0,0	0/1:17,4:0.226:21:9,3:8,1:13,4,2,2	3147_T1
chr1	23426266	.	TGG	T	.	PASS	AS_FilterStatus=SITE;AS_SB_TABLE=15,13|6,0;DP=43;ECNT=1;GERMQ=61;MBQ=35,35;MFRL=398,423;MMQ=60,60;MPOS=25;NALOD=1.01;NLOD=6.63;POPAF=6.00;RPA=12,10;RU=G;STR;STRQ=93;TLOD=14.52;ANN=T|intergenic_region|MODIFIER|Ogfrl1-Gm7784|ENSMUSG00000026158-ENSMUSG00000097920|intergenic_region|ENSMUSG00000026158-ENSMUSG00000097920|||n.23426267_23426268delGG||||||	GT:AD:AF:DP:F1R2:F2R1:SB	0/0:22,0:0.037:22:14,0:7,0:12,10,0,0	0/1:6,6:0.498:12:1,3:5,3:3,3,6,0	2985_T1
chr1	23515352	.	G	A	.	PASS	AS_FilterStatus=SITE;AS_SB_TABLE=29,30|5,3;DP=68;ECNT=1;GERMQ=93;MBQ=34,35;MFRL=424,424;MMQ=60,60;MPOS=29;NALOD=1.64;NLOD=12.64;POPAF=6.00;TLOD=24.05;ANN=A|intergenic_region|MODIFIER|Gm7784-B3gat2|ENSMUSG00000097920-ENSMUSG00000026156|intergenic_region|ENSMUSG00000097920-ENSMUSG00000026156|||n.23515352G>A||||||	GT:AD:AF:DP:F1R2:F2R1:SB	0/0:42,0:0.023:42:12,0:29,0:19,23,0,0	0/1:17,8:0.346:25:8,3:9,5:10,7,5,3	2985_T1
chr1	23535941	.	G	T	.	PASS	AS_FilterStatus=SITE;AS_SB_TABLE=22,28|1,2;DP=55;ECNT=1;GERMQ=93;MBQ=33,34;MFRL=421,440;MMQ=60,60;MPOS=37;NALOD=1.48;NLOD=8.73;POPAF=6.00;TLOD=6.92;ANN=T|intergenic_region|MODIFIER|Gm7784-B3gat2|ENSMUSG00000097920-ENSMUSG00000026156|intergenic_region|ENSMUSG00000097920-ENSMUSG00000026156|||n.23535941G>T||||||	GT:AD:AF:DP:F1R2:F2R1:SB	0/0:29,0:0.032:29:15,0:14,0:15,14,0,0	0/1:21,3:0.153:24:10,1:10,2:7,14,1,2	2985_T1
chr1	23569005	.	CTGTGTG	C	.	PASS	AS_FilterStatus=SITE;AS_SB_TABLE=2,28|2,4;DP=53;ECNT=1;GERMQ=50;MBQ=36,33;MFRL=469,534;MMQ=60,60;MPOS=44;NALOD=1.13;NLOD=6.22;POPAF=6.00;RPA=20,17;RU=TG;STR;STRQ=93;TLOD=19.72;ANN=C|intergenic_region|MODIFIER|Gm7784-B3gat2|ENSMUSG00000097920-ENSMUSG00000026156|intergenic_region|ENSMUSG00000097920-ENSMUSG00000026156|||n.23569006_23569011delTGTGTG||||||	GT:AD:AF:DP:F1R2:F2R1:SB	0/0:21,0:0.038:21:7,0:6,0:1,20,0,0	0/1:9,6:0.414:15:1,3:6,3:1,8,2,4	613_T1
chr1	23583254	.	A	G	.	PASS	AS_FilterStatus=SITE;AS_SB_TABLE=27,26|0,4;DP=60;ECNT=1;GERMQ=93;MBQ=34,34;MFRL=431,471;MMQ=60,60;MPOS=6;NALOD=1.49;NLOD=8.73;POPAF=6.00;TLOD=8.60;ANN=G|intergenic_region|MODIFIER|Gm7784-B3gat2|ENSMUSG00000097920-ENSMUSG00000026156|intergenic_region|ENSMUSG00000097920-ENSMUSG00000026156|||n.23583254A>G||||||	GT:AD:AF:DP:F1R2:F2R1:SB	0/0:30,0:0.031:30:16,0:14,0:13,17,0,0	0/1:23,4:0.172:27:13,2:10,2:14,9,0,4	2985_T1
chr1	23587122	.	CTTT	C	.	PASS	AS_FilterStatus=SITE;AS_SB_TABLE=16,15|4,4;DP=53;ECNT=1;GERMQ=53;MBQ=33,33;MFRL=468,430;MMQ=60,60;MPOS=29;NALOD=0.974;NLOD=6.55;POPAF=6.00;RPA=21,18;RU=T;STR;STRQ=93;TLOD=6.42;ANN=C|intergenic_region|MODIFIER|Gm7784-B3gat2|ENSMUSG00000097920-ENSMUSG00000026156|intergenic_region|ENSMUSG00000097920-ENSMUSG00000026156|||n.23587123_23587125delTTT||||||	GT:AD:AF:DP:F1R2:F2R1:SB	0/0:22,0:0.038:22:11,0:4,0:11,11,0,0	0/1:9,8:0.437:17:4,5:2,2:5,4,4,4	613_T1
chr1	23601196	.	A	G	.	PASS	AS_FilterStatus=SITE;AS_SB_TABLE=31,20|1,3;DP=58;ECNT=2;GERMQ=93;MBQ=35,34;MFRL=454,384;MMQ=60,60;MPOS=55;NALOD=1.16;NLOD=7.78;POPAF=6.00;TLOD=6.72;ANN=G|intergenic_region|MODIFIER|Gm7784-B3gat2|ENSMUSG00000097920-ENSMUSG00000026156|intergenic_region|ENSMUSG00000097920-ENSMUSG00000026156|||n.23601196A>G||||||	GT:AD:AF:DP:F1R2:F2R1:PGT:PID:PS:SB	0|0:26,0:0.035:26:10,0:15,0:1|0:23601194_GCA_G:23601194:17,9,0,0	1|0:25,4:0.164:29:11,1:11,3:1|0:23601194_GCA_G:23601194:14,11,1,3	613_T1
chr1	23642307	.	G	A	.	PASS	AS_FilterStatus=SITE;AS_SB_TABLE=27,44|1,5;DP=80;ECNT=1;GERMQ=93;MBQ=31,35;MFRL=455,486;MMQ=60,60;MPOS=40;NALOD=1.59;NLOD=11.13;POPAF=6.00;TLOD=15.63;ANN=A|intergenic_region|MODIFIER|Gm7784-B3gat2|ENSMUSG00000097920-ENSMUSG00000026156|intergenic_region|ENSMUSG00000097920-ENSMUSG00000026156|||n.23642307G>A||||||	GT:AD:AF:DP:F1R2:F2R1:SB	0/0:37,0:0.025:37:20,0:17,0:15,22,0,0	0/1:34,6:0.175:40:17,3:17,3:12,22,1,5	613_T1
chr1	23751660	.	TAC	T	.	PASS	AS_FilterStatus=SITE;AS_SB_TABLE=16,9|8,2;DP=51;ECNT=1;GERMQ=60;MBQ=35,34;MFRL=414,430;MMQ=60,60;MPOS=47;NALOD=1.47;NLOD=6.24;POPAF=6.00;RPA=18,17;RU=AC;STR;STRQ=12;TLOD=27.13;ANN=T|intergenic_region|MODIFIER|Gm7784-B3gat2|ENSMUSG00000097920-ENSMUSG00000026156|intergenic_region|ENSMUSG00000097920-ENSMUSG00000026156|||n.23751661_23751662delAC||||||	GT:AD:AF:DP:F1R2:F2R1:SB	0/0:22,0:0.035:22:9,0:7,0:15,7,0,0	0/1:3,10:0.739:13:1,4:0,4:1,2,8,2	2985_T1
chr1	23891678	.	CA	C	.	PASS	AS_FilterStatus=SITE;AS_SB_TABLE=11,7|5,7;DP=32;ECNT=1;GERMQ=31;MBQ=31,32;MFRL=411,427;MMQ=60,60;MPOS=29;NALOD=1.15;NLOD=3.53;POPAF=6.00;RPA=16,15;RU=A;STR;STRQ=15;TLOD=23.95;ANN=C|intron_variant|MODIFIER|Smap1|ENSMUSG00000026155|transcript|ENSMUST00000027339|protein_coding|2/9|c.252+181delT||||||	GT:AD:AF:DP:F1R2:F2R1:SB	0/0:12,0:0.067:12:4,0:7,0:7,5,0,0	0/1:6,12:0.654:18:1,8:1,2:4,2,5,7	3147_T1
chr1	23895753	.	TA	T	.	PASS	AS_FilterStatus=SITE;AS_SB_TABLE=6,7|7,3;DP=32;ECNT=1;GERMQ=35;MBQ=33,35;MFRL=455,431;MMQ=60,60;MPOS=21;NALOD=1.16;NLOD=3.57;POPAF=6.00;RPA=19,18;RU=A;STR;STRQ=20;TLOD=14.94;ANN=T|intron_variant|MODIFIER|Smap1|ENSMUSG00000026155|transcript|ENSMUST00000027339|protein_coding|1/9|c.119-3761delT||||||	GT:AD:AF:DP:F1R2:F2R1:SB	0/0:12,0:0.065:12:4,0:8,0:5,7,0,0	0/1:1,10:0.855:11:1,6:0,3:1,0,7,3	3147_T1
chr1	23922587	.	AT	A	.	PASS	AS_FilterStatus=SITE;AS_SB_TABLE=24,13|7,7;DP=60;ECNT=1;GERMQ=63;MBQ=34,34;MFRL=416,349;MMQ=60,60;MPOS=39;NALOD=1.44;NLOD=6.89;POPAF=6.00;RPA=12,11;RU=T;STR;STRQ=7;TLOD=21.53;ANN=A|upstream_gene_variant|MODIFIER|Smap1|ENSMUSG00000026155|transcript|ENSMUST00000027339|protein_coding||c.-433delA|||||271|,A|intergenic_region|MODIFIER|Smap1-1110058L19Rik|ENSMUSG00000026155-ENSMUSG00000026154|intergeni…	GT:AD:AF:DP:F1R2:F2R1:SB	0/0:23,0:0.036:23:9,0:14,0:16,7,0,0	0/1:14,14:0.460:28:5,6:7,8:8,6,7,7	2985_T1
chr1	23931248	.	TACAC	T	.	PASS	AS_FilterStatus=SITE;AS_SB_TABLE=25,5|2,1;DP=41;ECNT=1;GERMQ=62;MBQ=34,34;MFRL=428,313;MMQ=60,60;MPOS=46;NALOD=1.37;NLOD=5.66;POPAF=6.00;RPA=18,16;RU=AC;STR;STRQ=93;TLOD=8.32;ANN=T|intergenic_region|MODIFIER|Smap1-1110058L19Rik|ENSMUSG00000026155-ENSMUSG00000026154|intergenic_region|ENSMUSG00000026155-ENSMUSG00000026154|||n.23931249_23931252delACAC||||||	GT:AD:AF:DP:F1R2:F2R1:SB	0/0:19,0:0.042:19:11,0:5,0:16,3,0,0	0/1:11,3:0.247:14:5,1:5,2:9,2,2,1	3147_T1
chr1	24045270	.	TACACAC	T	.	PASS	AS_FilterStatus=SITE;AS_SB_TABLE=22,20|3,2;DP=59;ECNT=1;GERMQ=80;MBQ=34,34;MFRL=418,458;MMQ=60,60;MPOS=47;NALOD=1.15;NLOD=7.18;POPAF=6.00;RPA=18,15;RU=AC;STR;STRQ=93;TLOD=13.34;ANN=T|intron_variant|MODIFIER|Fam135a|ENSMUSG00000026153|transcript|ENSMUST00000027337|protein_coding|10/20|c.874-1007_874-1002delGTGTGT||||||	GT:AD:AF:DP:F1R2:F2R1:SB	0/0:24,0:0.036:24:12,0:6,0:13,11,0,0	0/1:18,5:0.239:23:9,3:6,2:9,9,3,2	613_T1
chr1	24051178	.	G	T	.	PASS	AS_FilterStatus=SITE;AS_SB_TABLE=35,29|7,3;DP=76;ECNT=1;GERMQ=93;MBQ=34,34;MFRL=427,441;MMQ=60,60;MPOS=31;NALOD=1.57;NLOD=10.79;POPAF=6.00;TLOD=25.48;ANN=T|intron_variant|MODIFIER|Fam135a|ENSMUSG00000026153|transcript|ENSMUST00000027337|protein_coding|9/20|c.823+2005C>A||||||	GT:AD:AF:DP:F1R2:F2R1:SB	0/0:38,0:0.026:38:21,0:16,0:16,22,0,0	0/1:26,10:0.278:36:15,7:10,3:19,7,7,3	2985_T1
chr1	24273924	.	CTT	C	.	PASS	AS_FilterStatus=SITE;AS_SB_TABLE=19,28|1,2;DP=64;ECNT=1;GERMQ=93;MBQ=33,32;MFRL=427,481;MMQ=60,60;MPOS=37;NALOD=1.46;NLOD=7.81;POPAF=6.00;RPA=17,15;RU=T;STR;STRQ=93;TLOD=5.56;ANN=C|intron_variant|MODIFIER|Col19a1|ENSMUSG00000026141|transcript|ENSMUST00000115244|protein_coding|48/50|c.3077-3432_3077-3431delAA||||||	GT:AD:AF:DP:F1R2:F2R1:SB	0/0:26,0:0.034:26:15,0:8,0:8,18,0,0	0/1:21,3:0.150:24:9,0:10,2:11,10,1,2	613_T1
chr1	24283729	.	TACAC	T	.	PASS	AS_FilterStatus=SITE;AS_SB_TABLE=14,13|1,2;DP=52;ECNT=1;GERMQ=59;MBQ=33,20;MFRL=446,512;MMQ=60,60;MPOS=11;NALOD=1.42;NLOD=5.63;POPAF=6.00;RPA=25,23;RU=AC;STR;STRQ=93;TLOD=6.11;ANN=T|intron_variant|MODIFIER|Col19a1|ENSMUSG00000026141|transcript|ENSMUST00000115244|protein_coding|46/50|c.2839-1146_2839-1143delGTGT||||||	GT:AD:AF:DP:F1R2:F2R1:SB	0/0:19,0:0.040:19:8,0:7,0:9,10,0,0	0/1:8,3:0.288:11:4,2:0,0:5,3,1,2	613_T1
chr1	24393208	.	C	A	.	PASS	AS_FilterStatus=SITE;AS_SB_TABLE=43,36|3,3;DP=88;ECNT=1;GERMQ=93;MBQ=34,35;MFRL=464,433;MMQ=60,60;MPOS=50;NALOD=1.61;NLOD=11.74;POPAF=6.00;TLOD=15.12;ANN=A|intron_variant|MODIFIER|Col19a1|ENSMUSG00000026141|transcript|ENSMUST00000115244|protein_coding|15/50|c.1215+16988G>T||||||	GT:AD:AF:DP:F1R2:F2R1:SB	0/0:39,0:0.024:39:25,0:14,0:25,14,0,0	0/1:40,6:0.146:46:21,2:19,4:18,22,3,3	613_T1
chr1	24440415	.	T	C	.	PASS	AS_FilterStatus=SITE;AS_SB_TABLE=18,17|2,1;DP=40;ECNT=2;GERMQ=76;MBQ=35,34;MFRL=464,402;MMQ=60,60;MPOS=31;NALOD=1.36;NLOD=5.97;POPAF=6.00;TLOD=6.65;ANN=C|intron_variant|MODIFIER|Col19a1|ENSMUSG00000026141|transcript|ENSMUST00000115244|protein_coding|14/50|c.1161+11347A>G||||||	GT:AD:AF:DP:F1R2:F2R1:SB	0/0:20,0:0.043:20:11,0:8,0:8,12,0,0	0/1:15,3:0.198:18:6,1:9,2:10,5,2,1	2985_T1
chr1	24442827	.	ATGTG	A	.	PASS	AS_FilterStatus=SITE;AS_SB_TABLE=12,20|0,4;DP=61;ECNT=1;GERMQ=63;MBQ=33,24;MFRL=415,379;MMQ=60,60;MPOS=53;NALOD=0.725;NLOD=4.72;POPAF=6.00;RPA=22,20;RU=TG;STR;STRQ=93;TLOD=8.51;ANN=A|intron_variant|MODIFIER|Col19a1|ENSMUSG00000026141|transcript|ENSMUST00000115244|protein_coding|14/50|c.1161+8931_1161+8934delCACA||||||	GT:AD:AF:DP:F1R2:F2R1:SB	0/0:16,0:0.045:16:3,0:9,0:6,10,0,0	0/1:16,4:0.243:20:3,1:6,1:6,10,0,4	613_T1
chr1	24456788	.	TAA	T	.	PASS	AS_FilterStatus=SITE;AS_SB_TABLE=42,33|1,3;DP=92;ECNT=1;GERMQ=93;MBQ=34,34;MFRL=459,395;MMQ=60,60;MPOS=55;NALOD=1.33;NLOD=11.44;POPAF=6.00;RPA=10,8;RU=A;STR;STRQ=93;TLOD=9.28;ANN=T|intron_variant|MODIFIER|Col19a1|ENSMUSG00000026141|transcript|ENSMUST00000115244|protein_coding|12/50|c.1072-2993_1072-2992delTT||||||	GT:AD:AF:DP:F1R2:F2R1:SB	0/0:38,0:0.024:38:18,0:19,0:24,14,0,0	0/1:37,4:0.115:41:19,1:16,3:18,19,1,3	613_T1
chr1	24546586	.	AT	A	.	PASS	AS_FilterStatus=SITE;AS_SB_TABLE=40,17|5,1;DP=64;ECNT=1;GERMQ=93;MBQ=34,35;MFRL=460,465;MMQ=60,50;MPOS=35;NALOD=1.44;NLOD=7.51;POPAF=6.00;RPA=6,5;RU=T;STR;STRQ=93;TLOD=11.17;ANN=A|downstream_gene_variant|MODIFIER|Gm26418|ENSMUSG00000077463|transcript|ENSMUST00000104275|snoRNA||n.*2254delA|||||2254|,A|intron_variant|MODIFIER|Col19a1|ENSMUSG00000026141|transcript|ENSMUST00000115244|protein_coding|4…	GT:AD:AF:DP:F1R2:F2R1:SB	0/0:25,0:0.035:25:14,0:11,0:16,9,0,0	0/1:32,6:0.179:38:18,2:14,4:24,8,5,1	613_T1
chr1	24548983	.	G	A	.	PASS	AS_FilterStatus=SITE;AS_SB_TABLE=22,30|4,7;DP=68;ECNT=1;GERMQ=90;MBQ=35,34;MFRL=444,553;MMQ=60,60;MPOS=43;NALOD=1.50;NLOD=9.03;POPAF=6.00;TLOD=30.77;ANN=A|upstream_gene_variant|MODIFIER|Gm26418|ENSMUSG00000077463|transcript|ENSMUST00000104275|snoRNA||n.-6C>T|||||6|,A|intron_variant|MODIFIER|Col19a1|ENSMUSG00000026141|transcript|ENSMUST00000115244|protein_coding|4/50|c.257+10671C>T||||||	GT:AD:AF:DP:F1R2:F2R1:SB	0/0:30,0:0.031:30:19,0:11,0:9,21,0,0	0/1:22,11:0.323:33:8,6:14,5:13,9,4,7	613_T1
chr1	24651800	.	T	C	.	PASS	AS_FilterStatus=SITE;AS_SB_TABLE=39,34|1,4;DP=81;ECNT=1;GERMQ=93;MBQ=36,28;MFRL=433,574;MMQ=60,60;MPOS=54;NALOD=1.68;NLOD=13.54;POPAF=6.00;TLOD=10.17;ANN=C|intergenic_region|MODIFIER|Gm10222-Lmbrd1|ENSMUSG00000067736-ENSMUSG00000073725|intergenic_region|ENSMUSG00000067736-ENSMUSG00000073725|||n.24651800T>C||||||	GT:AD:AF:DP:F1R2:F2R1:SB	0/0:45,0:0.021:45:24,0:21,0:26,19,0,0	0/1:28,5:0.176:33:13,2:15,3:13,15,1,4	2985_T1
chr1	24683519	.	T	C	.	PASS	AS_FilterStatus=SITE;AS_SB_TABLE=28,30|2,4;DP=67;ECNT=1;GERMQ=93;MBQ=35,35;MFRL=428,376;MMQ=60,60;MPOS=52;NALOD=1.42;NLOD=7.52;POPAF=6.00;TLOD=15.14;ANN=C|intron_variant|MODIFIER|Lmbrd1|ENSMUSG00000073725|transcript|ENSMUST00000095062|protein_coding|1/15|c.61-1878T>C||||||	GT:AD:AF:DP:F1R2:F2R1:SB	0/0:25,0:0.036:25:18,0:7,0:13,12,0,0	0/1:33,6:0.170:39:11,2:22,4:15,18,2,4	613_T1
chr1	24733950	.	A	C	.	PASS	AS_FilterStatus=SITE;AS_SB_TABLE=28,30|4,3;DP=67;ECNT=1;GERMQ=93;MBQ=35,34;MFRL=459,429;MMQ=60,60;MPOS=48;NALOD=1.48;NLOD=8.73;POPAF=6.00;TLOD=19.04;ANN=C|intron_variant|MODIFIER|Lmbrd1|ENSMUSG00000073725|transcript|ENSMUST00000095062|protein_coding|9/15|c.906+2051A>C||||||	GT:AD:AF:DP:F1R2:F2R1:SB	0/0:29,0:0.032:29:15,0:14,0:13,16,0,0	0/1:29,7:0.210:36:14,2:15,5:15,14,4,3	613_T1
chr1	24759760	.	CACACAGAG	C	.	PASS	AS_FilterStatus=SITE;AS_SB_TABLE=19,15|3,1;DP=45;ECNT=1;GERMQ=54;MBQ=32,32;MFRL=430,582;MMQ=60,60;MPOS=46;NALOD=1.05;NLOD=5.06;POPAF=6.00;TLOD=10.70;ANN=C|intron_variant|MODIFIER|Lmbrd1|ENSMUSG00000073725|transcript|ENSMUST00000095062|protein_coding|14/15|c.1409-2430_1409-2423delCACAGAGA||||||INFO_REALIGN_3_PRIME	GT:AD:AF:DP:F1R2:F2R1:SB	0/0:17,0:0.046:17:9,0:6,0:8,9,0,0	0/1:17,4:0.249:21:13,3:3,0:11,6,3,1	613_T1
chr1	24778070	.	TA	T	.	PASS	AS_FilterStatus=SITE;AS_SB_TABLE=31,43|3,3;DP=82;ECNT=1;GERMQ=93;MBQ=34,35;MFRL=448,439;MMQ=60,60;MPOS=39;NALOD=1.54;NLOD=9.92;POPAF=6.00;RPA=5,4;RU=A;STR;STRQ=93;TLOD=10.96;ANN=T|intergenic_region|MODIFIER|Lmbrd1-Bai3|ENSMUSG00000073725-ENSMUSG00000033569|intergenic_region|ENSMUSG00000073725-ENSMUSG00000033569|||n.24778071delA||||||	GT:AD:AF:DP:F1R2:F2R1:SB	0/0:33,0:0.028:33:17,0:16,0:14,19,0,0	0/1:41,6:0.145:47:21,2:19,4:17,24,3,3	613_T1
chr1	24822461	.	A	T	.	PASS	AS_FilterStatus=SITE;AS_SB_TABLE=43,42|2,2;DP=90;ECNT=1;GERMQ=93;MBQ=34,35;MFRL=447,474;MMQ=60,60;MPOS=61;NALOD=1.65;NLOD=13.24;POPAF=6.00;TLOD=7.73;ANN=T|intergenic_region|MODIFIER|Lmbrd1-Bai3|ENSMUSG00000073725-ENSMUSG00000033569|intergenic_region|ENSMUSG00000073725-ENSMUSG00000033569|||n.24822461A>T||||||	GT:AD:AF:DP:F1R2:F2R1:SB	0/0:44,0:0.022:44:21,0:23,0:24,20,0,0	0/1:41,4:0.108:45:20,1:20,3:19,22,2,2	613_T1
chr1	24876729	.	G	T	.	PASS	AS_FilterStatus=SITE;AS_SB_TABLE=24,16|1,2;DP=46;ECNT=1;GERMQ=89;MBQ=35,34;MFRL=421,538;MMQ=60,60;MPOS=18;NALOD=1.44;NLOD=7.52;POPAF=6.00;TLOD=7.64;ANN=T|intergenic_region|MODIFIER|Lmbrd1-Bai3|ENSMUSG00000073725-ENSMUSG00000033569|intergenic_region|ENSMUSG00000073725-ENSMUSG00000033569|||n.24876729G>T||||||	GT:AD:AF:DP:F1R2:F2R1:SB	0/0:26,0:0.036:26:14,0:12,0:15,11,0,0	0/1:14,3:0.210:17:6,1:8,2:9,5,1,2	2985_T1
chr1	24888396	.	TAA	T	.	PASS	AS_FilterStatus=SITE;AS_SB_TABLE=8,10|2,2;DP=30;ECNT=1;GERMQ=33;MBQ=19,28;MFRL=402,414;MMQ=60,60;MPOS=50;NALOD=0.728;NLOD=3.58;POPAF=6.00;RPA=23,21;RU=A;STR;STRQ=93;TLOD=6.55;ANN=T|intergenic_region|MODIFIER|Lmbrd1-Bai3|ENSMUSG00000073725-ENSMUSG00000033569|intergenic_region|ENSMUSG00000073725-ENSMUSG00000033569|||n.24888397_24888398delAA||||||	GT:AD:AF:DP:F1R2:F2R1:SB	0/0:12,0:0.062:12:2,0:2,0:4,8,0,0	0/1:6,4:0.450:10:3,2:1,1:4,2,2,2	2985_T1
chr1	24909299	.	GA	G	.	PASS	AS_FilterStatus=SITE;AS_SB_TABLE=17,14|12,7;DP=57;ECNT=1;GERMQ=66;MBQ=35,35;MFRL=416,440;MMQ=60,60;MPOS=51;NALOD=1.11;NLOD=6.60;POPAF=6.00;RPA=12,11;RU=A;STR;STRQ=61;TLOD=43.37;ANN=G|intergenic_region|MODIFIER|Lmbrd1-Bai3|ENSMUSG00000073725-ENSMUSG00000033569|intergenic_region|ENSMUSG00000073725-ENSMUSG00000033569|||n.24909300delA||||||	GT:AD:AF:DP:F1R2:F2R1:SB	0/0:22,0:0.039:22:8,0:13,0:11,11,0,0	0/1:9,19:0.667:28:5,9:4,10:6,3,12,7	2985_T1
chr1	24981919	.	A	C	.	PASS	AS_FilterStatus=SITE;AS_SB_TABLE=23,25|0,3;DP=52;ECNT=1;GERMQ=93;MBQ=35,36;MFRL=437,339;MMQ=60,60;MPOS=43;NALOD=1.44;NLOD=7.83;POPAF=6.00;TLOD=7.43;ANN=C|intergenic_region|MODIFIER|Lmbrd1-Bai3|ENSMUSG00000073725-ENSMUSG00000033569|intergenic_region|ENSMUSG00000073725-ENSMUSG00000033569|||n.24981919A>C||||||	GT:AD:AF:DP:F1R2:F2R1:SB	0/0:27,0:0.035:27:14,0:13,0:14,13,0,0	0/1:21,3:0.154:24:11,1:10,2:9,12,0,3	613_T1
chr1	24985081	.	TG	T	.	PASS	AS_FilterStatus=SITE;AS_SB_TABLE=15,21|3,3;DP=44;ECNT=1;GERMQ=72;MBQ=35,35;MFRL=447,427;MMQ=60,60;MPOS=42;NALOD=1.43;NLOD=7.15;POPAF=6.00;RPA=7,6;RU=G;STR;STRQ=93;TLOD=13.28;ANN=T|intergenic_region|MODIFIER|Lmbrd1-Bai3|ENSMUSG00000073725-ENSMUSG00000033569|intergenic_region|ENSMUSG00000073725-ENSMUSG00000033569|||n.24985082delG||||||	GT:AD:AF:DP:F1R2:F2R1:SB	0/0:25,0:0.036:25:14,0:11,0:11,14,0,0	0/1:11,6:0.368:17:5,4:6,2:4,7,3,3	2985_T1
chr1	25000743	.	G	A	.	PASS	AS_FilterStatus=SITE;AS_SB_TABLE=37,29|4,2;DP=72;ECNT=1;GERMQ=93;MBQ=35,35;MFRL=414,496;MMQ=60,60;MPOS=32;NALOD=1.56;NLOD=10.53;POPAF=6.00;TLOD=13.37;ANN=A|intergenic_region|MODIFIER|Lmbrd1-Bai3|ENSMUSG00000073725-ENSMUSG00000033569|intergenic_region|ENSMUSG00000073725-ENSMUSG00000033569|||n.25000743G>A||||||	GT:AD:AF:DP:F1R2:F2R1:SB	0/0:36,0:0.027:36:15,0:21,0:21,15,0,0	0/1:30,6:0.175:36:14,4:16,1:16,14,4,2	2985_T1
chr1	25003369	.	GTT	G	.	PASS	AS_FilterStatus=SITE;AS_SB_TABLE=11,11|4,2;DP=37;ECNT=1;GERMQ=33;MBQ=33,29;MFRL=430,447;MMQ=60,60;MPOS=47;NALOD=0.940;NLOD=3.65;POPAF=6.00;RPA=17,15;RU=T;STR;STRQ=93;TLOD=10.93;ANN=G|intergenic_region|MODIFIER|Lmbrd1-Bai3|ENSMUSG00000073725-ENSMUSG00000033569|intergenic_region|ENSMUSG00000073725-ENSMUSG00000033569|||n.25003370_25003371delTT||||||	GT:AD:AF:DP:F1R2:F2R1:SB	0/0:13,0:0.059:13:4,0:6,0:5,8,0,0	0/1:9,6:0.406:15:4,1:3,3:6,3,4,2	613_T1
chr1	25041006	.	G	T	.	PASS	AS_FilterStatus=SITE;AS_SB_TABLE=40,21|5,3;DP=73;ECNT=1;GERMQ=93;MBQ=35,34;MFRL=470,457;MMQ=60,60;MPOS=24;NALOD=1.57;NLOD=10.74;POPAF=6.00;TLOD=18.48;ANN=T|intergenic_region|MODIFIER|Lmbrd1-Bai3|ENSMUSG00000073725-ENSMUSG00000033569|intergenic_region|ENSMUSG00000073725-ENSMUSG00000033569|||n.25041006G>T||||||	GT:AD:AF:DP:F1R2:F2R1:SB	0/0:36,0:0.026:36:19,0:15,0:26,10,0,0	0/1:25,8:0.249:33:14,4:11,3:14,11,5,3	2985_T1
chr1	25052476	.	GTCTC	G	.	PASS	AS_FilterStatus=SITE;AS_SB_TABLE=25,18|2,2;DP=59;ECNT=1;GERMQ=93;MBQ=35,35;MFRL=447,353;MMQ=60,60;MPOS=48;NALOD=1.50;NLOD=8.03;POPAF=6.00;RPA=13,11;RU=TC;STR;STRQ=93;TLOD=11.50;ANN=G|intergenic_region|MODIFIER|Lmbrd1-Bai3|ENSMUSG00000073725-ENSMUSG00000033569|intergenic_region|ENSMUSG00000073725-ENSMUSG00000033569|||n.25052477_25052480delTCTC||||||	GT:AD:AF:DP:F1R2:F2R1:SB	0/0:27,0:0.031:27:13,0:11,0:18,9,0,0	0/1:16,4:0.226:20:7,1:5,3:7,9,2,2	613_T1
chr1	25085497	.	TA	T	.	PASS	AS_FilterStatus=SITE;AS_SB_TABLE=28,27|3,1;DP=67;ECNT=1;GERMQ=93;MBQ=34,35;MFRL=468,482;MMQ=60,60;MPOS=42;NALOD=1.50;NLOD=9.02;POPAF=6.00;RPA=7,6;RU=A;STR;STRQ=93;TLOD=6.63;ANN=T|intron_variant|MODIFIER|Bai3|ENSMUSG00000033569|transcript|ENSMUST00000041838|protein_coding|27/29|c.4240-1219delT||||||	GT:AD:AF:DP:F1R2:F2R1:SB	0/0:30,0:0.030:30:14,0:15,0:14,16,0,0	0/1:25,4:0.159:29:12,2:13,2:14,11,3,1	3147_T1
chr1	25144882	.	TTCTC	T	.	PASS	AS_FilterStatus=SITE;AS_SB_TABLE=15,11|2,1;DP=50;ECNT=1;GERMQ=50;MBQ=35,35;MFRL=437,385;MMQ=60,60;MPOS=50;NALOD=0.778;NLOD=2.96;POPAF=6.00;RPA=21,19;RU=TC;STR;STRQ=93;TLOD=7.06;ANN=T|intron_variant|MODIFIER|Bai3|ENSMUSG00000033569|transcript|ENSMUST00000041838|protein_coding|18/29|c.2815-13485_2815-13482delGAGA||||||	GT:AD:AF:DP:F1R2:F2R1:SB	0/0:10,0:0.066:10:5,0:4,0:5,5,0,0	0/1:16,3:0.188:19:7,1:9,2:10,6,2,1	613_T1
chr1	25161368	.	AG	A	.	PASS	AS_FilterStatus=SITE;AS_SB_TABLE=37,35|0,3;DP=75;ECNT=1;GERMQ=93;MBQ=35,36;MFRL=423,458;MMQ=60,60;MPOS=25;NALOD=1.61;NLOD=11.73;POPAF=6.00;RPA=2,1;RU=G;STR;STRQ=93;TLOD=5.87;ANN=A|intron_variant|MODIFIER|Bai3|ENSMUSG00000033569|transcript|ENSMUST00000041838|protein_coding|18/29|c.2815-29968delC||||||	GT:AD:AF:DP:F1R2:F2R1:SB	0/0:39,0:0.024:39:20,0:19,0:18,21,0,0	0/1:33,3:0.108:36:12,3:17,0:19,14,0,3	2985_T1
chr1	25168686	.	C	T	.	PASS	AS_FilterStatus=SITE;AS_SB_TABLE=38,23|2,3;DP=68;ECNT=1;GERMQ=93;MBQ=34,34;MFRL=447,435;MMQ=60,60;MPOS=25;NALOD=1.52;NLOD=9.54;POPAF=6.00;TLOD=12.69;ANN=T|intron_variant|MODIFIER|Bai3|ENSMUSG00000033569|transcript|ENSMUST00000041838|protein_coding|18/29|c.2815-37285G>A||||||	GT:AD:AF:DP:F1R2:F2R1:SB	0/0:32,0:0.029:32:10,0:20,0:16,16,0,0	0/1:29,5:0.166:34:15,2:14,3:22,7,2,3	613_T1
chr1	25179400	.	AT	A	.	PASS	AS_FilterStatus=SITE;AS_SB_TABLE=31,32|4,8;DP=78;ECNT=1;GERMQ=93;MBQ=34,34;MFRL=442,424;MMQ=60,60;MPOS=29;NALOD=1.57;NLOD=10.52;POPAF=6.00;RPA=7,6;RU=T;STR;STRQ=93;TLOD=26.01;ANN=A|intron_variant|MODIFIER|Bai3|ENSMUSG00000033569|transcript|ENSMUST00000041838|protein_coding|18/29|c.2814+42359delA||||||	GT:AD:AF:DP:F1R2:F2R1:SB	0/0:35,0:0.026:35:20,0:14,0:14,21,0,0	0/1:28,12:0.309:40:14,7:13,5:17,11,4,8	613_T1
chr1	25263970	.	ATTT	A	.	PASS	AS_FilterStatus=SITE;AS_SB_TABLE=30,21|3,3;DP=66;ECNT=1;GERMQ=93;MBQ=34,34;MFRL=449,459;MMQ=60,60;MPOS=48;NALOD=1.23;NLOD=8.24;POPAF=6.00;RPA=18,15;RU=T;STR;STRQ=93;TLOD=10.62;ANN=A|intron_variant|MODIFIER|Bai3|ENSMUSG00000033569|transcript|ENSMUST00000041838|protein_coding|15/29|c.2481-35426_2481-35424delAAA||||||	GT:AD:AF:DP:F1R2:F2R1:SB	0/0:28,0:0.030:28:14,0:8,0:15,13,0,0	0/1:23,6:0.208:29:11,2:10,3:15,8,3,3	613_T1
chr1	25339745	.	G	A	.	PASS	AS_FilterStatus=SITE;AS_SB_TABLE=23,21|2,1;DP=49;ECNT=1;GERMQ=93;MBQ=35,34;MFRL=438,324;MMQ=60,60;MPOS=42;NALOD=1.48;NLOD=8.73;POPAF=6.00;TLOD=7.44;ANN=A|intron_variant|MODIFIER|Bai3|ENSMUSG00000033569|transcript|ENSMUST00000041838|protein_coding|15/29|c.2480+56691C>T||||||	GT:AD:AF:DP:F1R2:F2R1:SB	0/0:29,0:0.032:29:13,0:16,0:15,14,0,0	0/1:15,3:0.200:18:9,3:6,0:8,7,2,1	3147_T1
chr1	25350005	.	CT	C	.	PASS	AS_FilterStatus=SITE;AS_SB_TABLE=12,11|4,11;DP=47;ECNT=2;GERMQ=53;MBQ=33,36;MFRL=457,448;MMQ=60,60;MPOS=40;NALOD=1.33;NLOD=5.39;POPAF=6.00;RPA=13,12;RU=T;STR;STRQ=43;TLOD=30.08;ANN=C|intron_variant|MODIFIER|Bai3|ENSMUSG00000033569|transcript|ENSMUST00000041838|protein_coding|15/29|c.2480+46430delA||||||	GT:AD:AF:DP:F1R2:F2R1:SB	0/0:18,0:0.045:18:8,0:8,0:9,9,0,0	0/1:5,15:0.727:20:2,3:2,9:3,2,4,11	3147_T1
chr1	25419751	.	GT	G	.	PASS	AS_FilterStatus=SITE;AS_SB_TABLE=31,39|3,2;DP=78;ECNT=1;GERMQ=93;MBQ=33,35;MFRL=446,423;MMQ=60,60;MPOS=33;NALOD=1.58;NLOD=10.82;POPAF=6.00;RPA=4,3;RU=T;STR;STRQ=93;TLOD=9.93;ANN=G|intron_variant|MODIFIER|Bai3|ENSMUSG00000033569|transcript|ENSMUST00000041838|protein_coding|14/29|c.2436+806delA||||||	GT:AD:AF:DP:F1R2:F2R1:SB	0/0:37,0:0.026:37:14,0:20,0:15,22,0,0	0/1:33,5:0.149:38:12,2:19,3:16,17,3,2	613_T1
chr1	25463349	.	C	T	.	PASS	AS_FilterStatus=SITE;AS_SB_TABLE=28,35|4,2;DP=71;ECNT=1;GERMQ=93;MBQ=28,34;MFRL=457,539;MMQ=60,60;MPOS=32;NALOD=1.48;NLOD=8.73;POPAF=6.00;TLOD=15.28;ANN=T|intron_variant|MODIFIER|Bai3|ENSMUSG00000033569|transcript|ENSMUST00000041838|protein_coding|9/29|c.1930-2538G>A||||||	GT:AD:AF:DP:F1R2:F2R1:SB	0/0:29,0:0.032:29:12,0:17,0:13,16,0,0	0/1:34,6:0.167:40:17,3:14,3:15,19,4,2	613_T1
chr1	25473518	.	ACC	A	.	PASS	AS_FilterStatus=SITE;AS_SB_TABLE=2,13|1,5;DP=31;ECNT=1;GERMQ=28;MBQ=36,35;MFRL=454,385;MMQ=60,60;MPOS=9;NALOD=0.813;NLOD=3.33;POPAF=6.00;RPA=14,12;RU=C;STR;STRQ=93;TLOD=12.12;ANN=A|intron_variant|MODIFIER|Bai3|ENSMUSG00000033569|transcript|ENSMUST00000041838|protein_coding|9/29|c.1930-12709_1930-12708delGG||||||	GT:AD:AF:DP:F1R2:F2R1:SB	0/0:11,0:0.065:11:1,0:9,0:2,9,0,0	0/1:4,6:0.584:10:0,1:4,5:0,4,1,5	2985_T1
chr1	25488714	.	CA	C	.	PASS	AS_FilterStatus=SITE;AS_SB_TABLE=31,28|4,5;DP=71;ECNT=1;GERMQ=93;MBQ=33,36;MFRL=396,433;MMQ=60,60;MPOS=25;NALOD=1.52;NLOD=9.32;POPAF=6.00;RPA=7,6;RU=A;STR;STRQ=93;TLOD=18.63;ANN=C|intron_variant|MODIFIER|Bai3|ENSMUSG00000033569|transcript|ENSMUST00000041838|protein_coding|8/29|c.1735-596delT||||||	GT:AD:AF:DP:F1R2:F2R1:SB	0/0:32,0:0.030:32:11,0:21,0:19,13,0,0	0/1:27,9:0.270:36:17,2:10,7:12,15,4,5	2985_T1
chr1	25535286	.	GTT	G	.	PASS	AS_FilterStatus=SITE;AS_SB_TABLE=33,35|2,2;DP=74;ECNT=1;GERMQ=93;MBQ=33,34;MFRL=448,413;MMQ=60,60;MPOS=42;NALOD=1.58;NLOD=10.83;POPAF=6.00;RPA=6,4;RU=T;STR;STRQ=93;TLOD=10.31;ANN=G|intron_variant|MODIFIER|Bai3|ENSMUSG00000033569|transcript|ENSMUST00000041838|protein_coding|4/29|c.1196-2649_1196-2648delAA||||||	GT:AD:AF:DP:F1R2:F2R1:SB	0/0:36,0:0.026:36:18,0:18,0:17,19,0,0	0/1:32,4:0.131:36:16,2:12,2:16,16,2,2	613_T1
chr1	25556369	.	TA	T	.	PASS	AS_FilterStatus=SITE;AS_SB_TABLE=30,39|7,6;DP=89;ECNT=1;GERMQ=93;MBQ=34,34;MFRL=420,445;MMQ=60,60;MPOS=46;NALOD=1.69;NLOD=13.21;POPAF=6.00;RPA=7,6;RU=A;STR;STRQ=93;TLOD=29.32;ANN=T|intron_variant|MODIFIER|Bai3|ENSMUSG00000033569|transcript|ENSMUST00000041838|protein_coding|2/29|c.869-2534delT||||||	GT:AD:AF:DP:F1R2:F2R1:SB	0/0:45,0:0.020:45:17,0:27,0:20,25,0,0	0/1:24,13:0.359:37:7,5:17,7:10,14,7,6	2985_T1
chr1	25597297	.	TAA	T	.	PASS	AS_FilterStatus=SITE;AS_SB_TABLE=17,13|0,3;DP=36;ECNT=1;GERMQ=68;MBQ=29,33;MFRL=436,358;MMQ=60,60;MPOS=14;NALOD=0.962;NLOD=6.61;POPAF=6.00;RPA=15,13;RU=A;STR;STRQ=93;TLOD=5.52;ANN=T|intron_variant|MODIFIER|Bai3|ENSMUSG00000033569|transcript|ENSMUST00000041838|protein_coding|1/29|c.758-37434_758-37433delTT||||||	GT:AD:AF:DP:F1R2:F2R1:SB	0/0:22,0:0.039:22:9,0:7,0:13,9,0,0	0/1:8,3:0.302:11:1,3:2,0:4,4,0,3	3147_T1
chr1	25629182	.	TG	T	.	PASS	AS_FilterStatus=SITE;AS_SB_TABLE=25,5|8,6;DP=48;ECNT=1;GERMQ=56;MBQ=35,34;MFRL=461,467;MMQ=60,60;MPOS=38;NALOD=1.37;NLOD=6.30;POPAF=6.00;RPA=10,9;RU=G;STR;STRQ=18;TLOD=32.47;ANN=T|intron_variant|MODIFIER|Bai3|ENSMUSG00000033569|transcript|ENSMUST00000041838|protein_coding|1/29|c.758-69318delC||||||	GT:AD:AF:DP:F1R2:F2R1:SB	0/0:21,0:0.041:21:12,0:9,0:16,5,0,0	0/1:9,14:0.606:23:4,3:4,9:9,0,8,6	613_T1
chr1	25640429	.	A	AT	.	PASS	AS_FilterStatus=SITE;AS_SB_TABLE=28,25|2,2;DP=62;ECNT=1;GERMQ=93;MBQ=34,34;MFRL=423,522;MMQ=60,60;MPOS=28;NALOD=1.49;NLOD=8.43;POPAF=6.00;RPA=5,6;RU=T;STR;STRQ=93;TLOD=7.00;ANN=AT|intron_variant|MODIFIER|Bai3|ENSMUSG00000033569|transcript|ENSMUST00000041838|protein_coding|1/29|c.758-80565dupA||||||	GT:AD:AF:DP:F1R2:F2R1:SB	0/0:29,0:0.031:29:12,0:17,0:13,16,0,0	0/1:24,4:0.166:28:15,3:9,1:15,9,2,2	3147_T1
chr1	25656647	.	A	G	.	PASS	AS_FilterStatus=SITE;AS_SB_TABLE=29,26|1,3;DP=63;ECNT=1;GERMQ=93;MBQ=34,34;MFRL=443,408;MMQ=60,60;MPOS=51;NALOD=1.54;NLOD=9.93;POPAF=6.00;TLOD=10.09;ANN=G|intron_variant|MODIFIER|Bai3|ENSMUSG00000033569|transcript|ENSMUST00000041838|protein_coding|1/29|c.758-96782T>C||||||	GT:AD:AF:DP:F1R2:F2R1:SB	0/0:33,0:0.028:33:17,0:16,0:18,15,0,0	0/1:22,4:0.178:26:9,2:13,2:11,11,1,3	2985_T1
chr1	25723908	.	C	T	.	PASS	AS_FilterStatus=SITE;AS_SB_TABLE=30,32|5,3;DP=71;ECNT=1;GERMQ=93;MBQ=36,35;MFRL=487,512;MMQ=60,60;MPOS=37;NALOD=1.53;NLOD=9.93;POPAF=6.00;TLOD=22.15;ANN=T|intron_variant|MODIFIER|Bai3|ENSMUSG00000033569|transcript|ENSMUST00000041838|protein_coding|1/29|c.757+102096G>A||||||	GT:AD:AF:DP:F1R2:F2R1:SB	0/0:33,0:0.029:33:22,0:11,0:18,15,0,0	0/1:29,8:0.231:37:8,2:21,6:12,17,5,3	613_T1
chr1	25727541	.	GA	G	.	PASS	AS_FilterStatus=SITE;AS_SB_TABLE=38,21|5,1;DP=67;ECNT=1;GERMQ=93;MBQ=35,36;MFRL=407,390;MMQ=60,60;MPOS=47;NALOD=1.45;NLOD=7.81;POPAF=6.00;RPA=5,4;RU=A;STR;STRQ=93;TLOD=11.58;ANN=G|intron_variant|MODIFIER|Bai3|ENSMUSG00000033569|transcript|ENSMUST00000041838|protein_coding|1/29|c.757+98462delT||||||	GT:AD:AF:DP:F1R2:F2R1:SB	0/0:26,0:0.034:26:7,0:16,0:16,10,0,0	0/1:33,6:0.175:39:19,4:13,2:22,11,5,1	613_T1
chr1	25754932	.	G	A	.	PASS	AS_FilterStatus=SITE;AS_SB_TABLE=26,29|2,2;DP=61;ECNT=1;GERMQ=93;MBQ=35,35;MFRL=463,468;MMQ=60,60;MPOS=38;NALOD=1.49;NLOD=9.03;POPAF=6.00;TLOD=7.31;ANN=A|intron_variant|MODIFIER|Bai3|ENSMUSG00000033569|transcript|ENSMUST00000041838|protein_coding|1/29|c.757+71072C>T||||||	GT:AD:AF:DP:F1R2:F2R1:SB	0/0:30,0:0.031:30:13,0:16,0:16,14,0,0	0/1:25,4:0.152:29:12,2:13,1:10,15,2,2	3147_T1
chr1	25764364	.	G	A	.	PASS	AS_FilterStatus=SITE;AS_SB_TABLE=25,29|4,4;DP=63;ECNT=1;GERMQ=93;MBQ=32,34;MFRL=417,493;MMQ=60,60;MPOS=37;NALOD=1.48;NLOD=8.73;POPAF=6.00;TLOD=22.92;ANN=A|intron_variant|MODIFIER|Bai3|ENSMUSG00000033569|transcript|ENSMUST00000041838|protein_coding|1/29|c.757+61640C>T||||||	GT:AD:AF:DP:F1R2:F2R1:SB	0/0:30,0:0.032:30:19,0:11,0:14,16,0,0	0/1:24,8:0.273:32:9,6:15,2:11,13,4,4	3147_T1
chr1	25805517	.	G	A	.	PASS	AS_FilterStatus=SITE;AS_SB_TABLE=51,37|3,2;DP=94;ECNT=1;GERMQ=93;MBQ=34,36;MFRL=452,537;MMQ=60,60;MPOS=46;NALOD=1.63;NLOD=12.34;POPAF=6.00;TLOD=12.46;ANN=A|intron_variant|MODIFIER|Bai3|ENSMUSG00000033569|transcript|ENSMUST00000041838|protein_coding|1/29|c.757+20487C>T||||||	GT:AD:AF:DP:F1R2:F2R1:SB	0/0:42,0:0.023:42:15,0:27,0:25,17,0,0	0/1:46,5:0.116:51:21,1:24,4:26,20,3,2	613_T1
chr1	25824640	.	CT	C	.	PASS	AS_FilterStatus=SITE;AS_SB_TABLE=42,27|3,1;DP=79;ECNT=1;GERMQ=93;MBQ=32,32;MFRL=438,428;MMQ=60,60;MPOS=30;NALOD=1.55;NLOD=10.22;POPAF=6.00;RPA=7,6;RU=T;STR;STRQ=93;TLOD=5.93;ANN=C|intron_variant|MODIFIER|Bai3|ENSMUSG00000033569|transcript|ENSMUST00000041838|protein_coding|1/29|c.757+1363delA||||||	GT:AD:AF:DP:F1R2:F2R1:SB	0/0:34,0:0.027:34:15,0:18,0:20,14,0,0	0/1:35,4:0.123:39:20,2:15,2:22,13,3,1	613_T1
chr1	25837305	.	C	G	.	PASS	AS_FilterStatus=SITE;AS_SB_TABLE=42,32|3,2;DP=81;ECNT=1;GERMQ=93;MBQ=33,31;MFRL=466,507;MMQ=60,60;MPOS=66;NALOD=1.53;NLOD=9.84;POPAF=6.00;TLOD=8.98;ANN=G|intergenic_region|MODIFIER|Gm9884-Gm24064|ENSMUSG00000052558-ENSMUSG00000088111|intergenic_region|ENSMUSG00000052558-ENSMUSG00000088111|||n.25837305C>G||||||	GT:AD:AF:DP:F1R2:F2R1:SB	0/0:33,0:0.029:33:15,0:16,0:13,20,0,0	0/1:41,5:0.117:46:23,2:17,2:29,12,3,2	613_T1
chr1	25925942	.	AT	A	.	PASS	AS_FilterStatus=SITE;AS_SB_TABLE=20,25|12,3;DP=63;ECNT=1;GERMQ=93;MBQ=35,34;MFRL=441,390;MMQ=60,60;MPOS=55;NALOD=1.58;NLOD=10.20;POPAF=6.00;RPA=11,10;RU=T;STR;STRQ=24;TLOD=32.22;ANN=A|intergenic_region|MODIFIER|Gm9884-Gm24064|ENSMUSG00000052558-ENSMUSG00000088111|intergenic_region|ENSMUSG00000052558-ENSMUSG00000088111|||n.25925943delT||||||	GT:AD:AF:DP:F1R2:F2R1:SB	0/0:34,0:0.026:34:15,0:16,0:16,18,0,0	0/1:11,15:0.570:26:3,10:7,5:4,7,12,3	2985_T1
chr1	25975198	.	GTTT	G	.	PASS	AS_FilterStatus=SITE;AS_SB_TABLE=30,23|8,3;DP=68;ECNT=1;GERMQ=74;MBQ=33,36;MFRL=444,429;MMQ=60,60;MPOS=46;NALOD=1.01;NLOD=7.44;POPAF=6.00;RPA=12,9;RU=T;STR;STRQ=93;TLOD=32.62;ANN=G|intergenic_region|MODIFIER|Gm9884-Gm24064|ENSMUSG00000052558-ENSMUSG00000088111|intergenic_region|ENSMUSG00000052558-ENSMUSG00000088111|||n.25975199_25975201delTTT||||||	GT:AD:AF:DP:F1R2:F2R1:SB	0/0:27,0:0.034:27:11,0:9,0:14,13,0,0	0/1:26,11:0.304:37:12,5:7,3:16,10,8,3	2985_T1
chr1	26008705	.	C	A	.	PASS	AS_FilterStatus=SITE;AS_SB_TABLE=23,24|3,2;DP=56;ECNT=1;GERMQ=93;MBQ=35,34;MFRL=464,259;MMQ=60,50;MPOS=19;NALOD=1.53;NLOD=9.33;POPAF=6.00;TLOD=11.85;ANN=A|intergenic_region|MODIFIER|Gm9884-Gm24064|ENSMUSG00000052558-ENSMUSG00000088111|intergenic_region|ENSMUSG00000052558-ENSMUSG00000088111|||n.26008705C>A||||||	GT:AD:AF:DP:F1R2:F2R1:SB	0/0:31,0:0.029:31:19,0:12,0:15,16,0,0	0/1:16,5:0.227:21:9,2:7,3:8,8,3,2	3147_T1
chr1	26082220	.	A	G	.	PASS	AS_FilterStatus=SITE;AS_SB_TABLE=33,35|5,2;DP=76;ECNT=1;GERMQ=93;MBQ=34,28;MFRL=429,444;MMQ=60,60;MPOS=35;NALOD=1.63;NLOD=12.34;POPAF=6.00;TLOD=15.46;ANN=G|intergenic_region|MODIFIER|Gm9884-Gm24064|ENSMUSG00000052558-ENSMUSG00000088111|intergenic_region|ENSMUSG00000052558-ENSMUSG00000088111|||n.26082220A>G||||||	GT:AD:AF:DP:F1R2:F2R1:SB	0/0:41,0:0.023:41:18,0:23,0:19,22,0,0	0/1:27,7:0.223:34:14,4:12,3:14,13,5,2	3147_T1
chr1	26139623	.	T	C	.	PASS	AS_FilterStatus=SITE;AS_SB_TABLE=35,28|2,1;DP=66;ECNT=1;GERMQ=93;MBQ=34,33;MFRL=441,365;MMQ=48,40;MPOS=52;NALOD=1.50;NLOD=9.28;POPAF=6.00;TLOD=6.36;ANN=C|intergenic_region|MODIFIER|Gm9884-Gm24064|ENSMUSG00000052558-ENSMUSG00000088111|intergenic_region|ENSMUSG00000052558-ENSMUSG00000088111|||n.26139623T>C||||||	GT:AD:AF:DP:F1R2:F2R1:SB	0/0:32,0:0.030:32:18,0:13,0:20,12,0,0	0/1:31,3:0.114:34:14,1:17,2:15,16,2,1	3147_T1
chr1	26184118	.	C	T	.	PASS	AS_FilterStatus=SITE;AS_SB_TABLE=37,26|2,1;DP=66;ECNT=1;GERMQ=93;MBQ=34,35;MFRL=461,407;MMQ=60,60;MPOS=47;NALOD=1.50;NLOD=9.28;POPAF=6.00;TLOD=6.66;ANN=T|intergenic_region|MODIFIER|Gm9884-Gm24064|ENSMUSG00000052558-ENSMUSG00000088111|intergenic_region|ENSMUSG00000052558-ENSMUSG00000088111|||n.26184118C>T||||||	GT:AD:AF:DP:F1R2:F2R1:SB	0/0:31,0:0.030:31:14,0:16,0:19,12,0,0	0/1:32,3:0.108:35:16,0:16,3:18,14,2,1	613_T1
chr1	26202337	.	AG	A	.	PASS	AS_FilterStatus=SITE;AS_SB_TABLE=24,30|1,3;DP=62;ECNT=1;GERMQ=93;MBQ=36,37;MFRL=474,382;MMQ=60,60;MPOS=37;NALOD=1.51;NLOD=9.02;POPAF=6.00;RPA=5,4;RU=G;STR;STRQ=93;TLOD=7.34;ANN=A|intergenic_region|MODIFIER|Gm9884-Gm24064|ENSMUSG00000052558-ENSMUSG00000088111|intergenic_region|ENSMUSG00000052558-ENSMUSG00000088111|||n.26202338delG||||||	GT:AD:AF:DP:F1R2:F2R1:SB	0/0:30,0:0.030:30:16,0:13,0:12,18,0,0	0/1:24,4:0.170:28:15,3:8,1:12,12,1,3	613_T1
chr1	26210750	.	C	T	.	PASS	AS_FilterStatus=SITE;AS_SB_TABLE=34,36|4,2;DP=78;ECNT=1;GERMQ=93;MBQ=35,34;MFRL=435,413;MMQ=60,60;MPOS=29;NALOD=1.56;NLOD=10.49;POPAF=6.00;TLOD=15.09;ANN=T|intergenic_region|MODIFIER|Gm9884-Gm24064|ENSMUSG00000052558-ENSMUSG00000088111|intergenic_region|ENSMUSG00000052558-ENSMUSG00000088111|||n.26210750C>T||||||	GT:AD:AF:DP:F1R2:F2R1:SB	0/0:35,0:0.027:35:17,0:16,0:17,18,0,0	0/1:35,6:0.163:41:23,3:12,3:17,18,4,2	613_T1
chr1	26233115	.	CTT	C	.	PASS	AS_FilterStatus=SITE;AS_SB_TABLE=13,22|3,3;DP=60;ECNT=1;GERMQ=70;MBQ=33,33;MFRL=464,536;MMQ=60,60;MPOS=22;NALOD=1.02;NLOD=6.90;POPAF=6.00;RPA=20,18;RU=T;STR;STRQ=93;TLOD=7.20;ANN=C|intergenic_region|MODIFIER|Gm9884-Gm24064|ENSMUSG00000052558-ENSMUSG00000088111|intergenic_region|ENSMUSG00000052558-ENSMUSG00000088111|||n.26233116_26233117delTT||||||	GT:AD:AF:DP:F1R2:F2R1:SB	0/0:23,0:0.035:23:6,0:11,0:8,15,0,0	0/1:12,6:0.347:18:5,2:4,3:5,7,3,3	613_T1
chr1	26244780	.	CT	C	.	PASS	AS_FilterStatus=SITE;AS_SB_TABLE=20,22|7,6;DP=60;ECNT=1;GERMQ=88;MBQ=34,33;MFRL=427,426;MMQ=60,60;MPOS=40;NALOD=1.54;NLOD=9.25;POPAF=6.00;RPA=13,12;RU=T;STR;STRQ=9;TLOD=26.66;ANN=C|intergenic_region|MODIFIER|Gm9884-Gm24064|ENSMUSG00000052558-ENSMUSG00000088111|intergenic_region|ENSMUSG00000052558-ENSMUSG00000088111|||n.26244781delT||||||	GT:AD:AF:DP:F1R2:F2R1:SB	0/0:31,0:0.028:31:15,0:13,0:15,16,0,0	0/1:11,13:0.539:24:4,9:7,4:5,6,7,6	2985_T1
chr1	26250575	.	T	C	.	PASS	AS_FilterStatus=SITE;AS_SB_TABLE=33,23|2,1;DP=59;ECNT=1;GERMQ=93;MBQ=34,34;MFRL=425,429;MMQ=60,60;MPOS=60;NALOD=1.54;NLOD=9.84;POPAF=6.00;TLOD=7.04;ANN=C|intergenic_region|MODIFIER|Gm9884-Gm24064|ENSMUSG00000052558-ENSMUSG00000088111|intergenic_region|ENSMUSG00000052558-ENSMUSG00000088111|||n.26250575T>C||||||	GT:AD:AF:DP:F1R2:F2R1:SB	0/0:34,0:0.028:34:15,0:17,0:18,16,0,0	0/1:22,3:0.147:25:12,2:10,1:15,7,2,1	613_T1
chr1	26363745	.	C	T	.	PASS	AS_FilterStatus=SITE;AS_SB_TABLE=44,29|2,2;DP=79;ECNT=1;GERMQ=93;MBQ=34,35;MFRL=470,409;MMQ=60,60;MPOS=22;NALOD=1.60;NLOD=11.69;POPAF=6.00;TLOD=9.04;ANN=T|intergenic_region|MODIFIER|Gm9884-Gm24064|ENSMUSG00000052558-ENSMUSG00000088111|intergenic_region|ENSMUSG00000052558-ENSMUSG00000088111|||n.26363745C>T||||||	GT:AD:AF:DP:F1R2:F2R1:SB	0/0:39,0:0.024:39:25,0:13,0:20,19,0,0	0/1:34,4:0.125:38:13,3:21,1:24,10,2,2	613_T1
chr1	26394655	.	GA	G	.	PASS	AS_FilterStatus=SITE;AS_SB_TABLE=32,42|5,5;DP=92;ECNT=1;GERMQ=93;MBQ=34,35;MFRL=444,368;MMQ=60,60;MPOS=37;NALOD=1.58;NLOD=10.82;POPAF=6.00;RPA=7,6;RU=A;STR;STRQ=93;TLOD=18.29;ANN=G|intergenic_region|MODIFIER|Gm9884-Gm24064|ENSMUSG00000052558-ENSMUSG00000088111|intergenic_region|ENSMUSG00000052558-ENSMUSG00000088111|||n.26394656delA||||||	GT:AD:AF:DP:F1R2:F2R1:SB	0/0:36,0:0.026:36:19,0:16,0:16,20,0,0	0/1:38,10:0.218:48:18,4:19,6:16,22,5,5	2985_T1
chr1	26395717	.	C	T	.	PASS	AS_FilterStatus=SITE;AS_SB_TABLE=36,37|3,3;DP=81;ECNT=1;GERMQ=93;MBQ=34,34;MFRL=406,548;MMQ=60,60;MPOS=7;NALOD=1.64;NLOD=12.64;POPAF=6.00;TLOD=12.93;ANN=T|intergenic_region|MODIFIER|Gm9884-Gm24064|ENSMUSG00000052558-ENSMUSG00000088111|intergenic_region|ENSMUSG00000052558-ENSMUSG00000088111|||n.26395717C>T||||||	GT:AD:AF:DP:F1R2:F2R1:SB	0/0:45,0:0.023:45:25,0:18,0:23,22,0,0	0/1:28,6:0.190:34:13,2:15,3:13,15,3,3	2985_T1
chr1	26406378	.	CAAAA	C	.	PASS	AS_FilterStatus=SITE;AS_SB_TABLE=32,22|1,2;DP=64;ECNT=1;GERMQ=93;MBQ=33,36;MFRL=463,476;MMQ=60,60;MPOS=20;NALOD=1.16;NLOD=11.38;POPAF=6.00;RPA=13,9;RU=A;STR;STRQ=93;TLOD=9.57;ANN=C|intergenic_region|MODIFIER|Gm9884-Gm24064|ENSMUSG00000052558-ENSMUSG00000088111|intergenic_region|ENSMUSG00000052558-ENSMUSG00000088111|||n.26406379_26406382delAAAA||||||	GT:AD:AF:DP:F1R2:F2R1:SB	0/0:38,0:0.024:38:18,0:18,0:21,17,0,0	0/1:16,3:0.194:19:9,2:4,1:11,5,1,2	613_T1
chr1	26425978	.	TACAC	T	.	PASS	AS_FilterStatus=SITE;AS_SB_TABLE=20,5|3,2;DP=45;ECNT=1;GERMQ=41;MBQ=34,35;MFRL=450,421;MMQ=60,60;MPOS=35;NALOD=0.970;NLOD=3.81;POPAF=6.00;RPA=23,21;RU=AC;STR;STRQ=93;TLOD=14.75;ANN=T|intergenic_region|MODIFIER|Gm9884-Gm24064|ENSMUSG00000052558-ENSMUSG00000088111|intergenic_region|ENSMUSG00000052558-ENSMUSG00000088111|||n.26425979_26425982delACAC||||||	GT:AD:AF:DP:F1R2:F2R1:SB	0/0:13,0:0.056:13:8,0:4,0:11,2,0,0	0/1:12,5:0.315:17:6,4:5,1:9,3,3,2	613_T1
chr1	26437235	.	CA	C	.	PASS	AS_FilterStatus=SITE;AS_SB_TABLE=30,27|5,1;DP=67;ECNT=1;GERMQ=93;MBQ=33,32;MFRL=441,531;MMQ=60,60;MPOS=50;NALOD=1.61;NLOD=11.42;POPAF=6.00;RPA=7,6;RU=A;STR;STRQ=93;TLOD=12.00;ANN=C|intergenic_region|MODIFIER|Gm9884-Gm24064|ENSMUSG00000052558-ENSMUSG00000088111|intergenic_region|ENSMUSG00000052558-ENSMUSG00000088111|||n.26437236delA||||||	GT:AD:AF:DP:F1R2:F2R1:SB	0/0:38,0:0.024:38:18,0:20,0:23,15,0,0	0/1:19,6:0.258:25:9,2:10,4:7,12,5,1	2985_T1
chr1	26479004	.	C	T	.	PASS	AS_FilterStatus=SITE;AS_SB_TABLE=26,40|3,4;DP=77;ECNT=1;GERMQ=93;MBQ=36,34;MFRL=450,499;MMQ=60,60;MPOS=43;NALOD=1.54;NLOD=10.23;POPAF=6.00;TLOD=18.75;ANN=T|intergenic_region|MODIFIER|Gm9884-Gm24064|ENSMUSG00000052558-ENSMUSG00000088111|intergenic_region|ENSMUSG00000052558-ENSMUSG00000088111|||n.26479004C>T||||||	GT:AD:AF:DP:F1R2:F2R1:SB	0/0:34,0:0.028:34:17,0:17,0:19,15,0,0	0/1:32,7:0.201:39:19,3:11,4:7,25,3,4	613_T1
chr1	26498325	.	C	A	.	PASS	AS_FilterStatus=SITE;AS_SB_TABLE=27,29|2,3;DP=62;ECNT=1;GERMQ=93;MBQ=34,34;MFRL=438,423;MMQ=60,60;MPOS=62;NALOD=1.52;NLOD=9.63;POPAF=6.00;TLOD=13.24;ANN=A|intergenic_region|MODIFIER|Gm9884-Gm24064|ENSMUSG00000052558-ENSMUSG00000088111|intergenic_region|ENSMUSG00000052558-ENSMUSG00000088111|||n.26498325C>A||||||	GT:AD:AF:DP:F1R2:F2R1:SB	0/0:34,0:0.029:34:18,0:16,0:18,16,0,0	0/1:22,5:0.207:27:9,2:12,3:9,13,2,3	613_T1
chr1	26500885	.	C	A	.	PASS	AS_FilterStatus=SITE;AS_SB_TABLE=19,24|2,1;DP=46;ECNT=1;GERMQ=93;MBQ=36,35;MFRL=415,521;MMQ=60,60;MPOS=39;NALOD=1.38;NLOD=6.92;POPAF=6.00;TLOD=7.30;ANN=A|intergenic_region|MODIFIER|Gm9884-Gm24064|ENSMUSG00000052558-ENSMUSG00000088111|intergenic_region|ENSMUSG00000052558-ENSMUSG00000088111|||n.26500885C>A||||||	GT:AD:AF:DP:F1R2:F2R1:SB	0/0:23,0:0.040:23:7,0:16,0:9,14,0,0	0/1:20,3:0.160:23:11,2:9,1:10,10,2,1	3147_T1
chr1	26518832	.	T	TA	.	PASS	AS_FilterStatus=SITE;AS_SB_TABLE=38,34|3,1;DP=80;ECNT=1;GERMQ=93;MBQ=34,35;MFRL=431,394;MMQ=60,60;MPOS=56;NALOD=1.59;NLOD=11.42;POPAF=6.00;RPA=6,7;RU=A;STR;STRQ=93;TLOD=5.97;ANN=TA|intergenic_region|MODIFIER|Gm9884-Gm24064|ENSMUSG00000052558-ENSMUSG00000088111|intergenic_region|ENSMUSG00000052558-ENSMUSG00000088111|||n.26518832_26518833insA||||||	GT:AD:AF:DP:F1R2:F2R1:SB	0/0:38,0:0.025:38:22,0:15,0:21,17,0,0	0/1:34,4:0.124:38:17,3:17,1:17,17,3,1	613_T1
chr1	26540617	.	G	T	.	PASS	AS_FilterStatus=SITE;AS_SB_TABLE=28,29|4,3;DP=65;ECNT=2;GERMQ=93;MBQ=33,34;MFRL=443,441;MMQ=60,60;MPOS=36;NALOD=1.42;NLOD=7.48;POPAF=6.00;TLOD=18.55;ANN=T|intergenic_region|MODIFIER|Gm9884-Gm24064|ENSMUSG00000052558-ENSMUSG00000088111|intergenic_region|ENSMUSG00000052558-ENSMUSG00000088111|||n.26540617G>T||||||	GT:AD:AF:DP:F1R2:F2R1:SB	0/0:26,0:0.037:26:16,0:9,0:16,10,0,0	0/1:31,7:0.200:38:17,3:14,4:12,19,4,3	613_T1
chr1	26590614	.	T	C	.	PASS	AS_FilterStatus=SITE;AS_SB_TABLE=22,17|5,2;DP=48;ECNT=1;GERMQ=70;MBQ=35,35;MFRL=411,416;MMQ=40,40;MPOS=25;NALOD=1.40;NLOD=7.17;POPAF=6.00;TLOD=18.25;ANN=C|intergenic_region|MODIFIER|Gm24064-4931408C20Rik|ENSMUSG00000088111-ENSMUSG00000073722|intergenic_region|ENSMUSG00000088111-ENSMUSG00000073722|||n.26590614T>C||||||	GT:AD:AF:DP:F1R2:F2R1:SB	0/0:24,0:0.039:24:14,0:9,0:14,10,0,0	0/1:15,7:0.325:22:10,3:5,3:8,7,5,2	3147_T1
chr1	26593201	.	G	A	.	PASS	AS_FilterStatus=SITE;AS_SB_TABLE=40,30|4,3;DP=78;ECNT=1;GERMQ=93;MBQ=35,34;MFRL=442,445;MMQ=60,60;MPOS=51;NALOD=1.57;NLOD=10.79;POPAF=6.00;TLOD=18.46;ANN=A|intergenic_region|MODIFIER|Gm24064-4931408C20Rik|ENSMUSG00000088111-ENSMUSG00000073722|intergenic_region|ENSMUSG00000088111-ENSMUSG00000073722|||n.26593201G>A||||||	GT:AD:AF:DP:F1R2:F2R1:SB	0/0:36,0:0.026:36:17,0:18,0:21,15,0,0	0/1:34,7:0.190:41:24,5:10,2:19,15,4,3	613_T1
chr1	26617265	.	CGTGT	C	.	PASS	AS_FilterStatus=SITE;AS_SB_TABLE=13,17|3,1;DP=65;ECNT=1;GERMQ=67;MBQ=31,33;MFRL=414,525;MMQ=60,60;MPOS=52;NALOD=1.08;NLOD=7.13;POPAF=6.00;RPA=22,20;RU=GT;STR;STRQ=93;TLOD=9.05;ANN=C|intergenic_region|MODIFIER|Gm24064-4931408C20Rik|ENSMUSG00000088111-ENSMUSG00000073722|intergenic_region|ENSMUSG00000088111-ENSMUSG00000073722|||n.26617266_26617269delGTGT||||||	GT:AD:AF:DP:F1R2:F2R1:SB	0/0:24,0:0.032:24:11,0:7,0:10,14,0,0	0/1:6,4:0.424:10:0,2:5,2:3,3,3,1	613_T1
chr1	26626572	.	CA	C	.	PASS	AS_FilterStatus=SITE;AS_SB_TABLE=9,17|9,6;DP=50;ECNT=1;GERMQ=50;MBQ=33,33;MFRL=448,469;MMQ=60,60;MPOS=39;NALOD=0.893;NLOD=5.34;POPAF=6.00;RPA=18,17;RU=A;STR;STRQ=35;TLOD=22.79;ANN=C|intergenic_region|MODIFIER|Gm24064-4931408C20Rik|ENSMUSG00000088111-ENSMUSG00000073722|intergenic_region|ENSMUSG00000088111-ENSMUSG00000073722|||n.26626573delA||||||	GT:AD:AF:DP:F1R2:F2R1:SB	0/0:19,0:0.045:19:5,0:10,0:7,12,0,0	0/1:7,15:0.663:22:3,8:2,5:2,5,9,6	3147_T1
chr1	26716336	.	C	T	.	PASS	AS_FilterStatus=SITE;AS_SB_TABLE=28,34|5,4;DP=72;ECNT=1;GERMQ=93;MBQ=33,34;MFRL=430,340;MMQ=60,60;MPOS=33;NALOD=1.47;NLOD=8.43;POPAF=6.00;TLOD=22.68;ANN=T|intergenic_region|MODIFIER|4931408C20Rik-n-R5s209|ENSMUSG00000073722-ENSMUSG00000095256|intergenic_region|ENSMUSG00000073722-ENSMUSG00000095256|||n.26716336C>T||||||	GT:AD:AF:DP:F1R2:F2R1:SB	0/0:30,0:0.033:30:18,0:12,0:14,16,0,0	0/1:32,9:0.215:41:16,7:15,2:14,18,5,4	613_T1
chr1	26719279	.	C	A	.	PASS	AS_FilterStatus=SITE;AS_SB_TABLE=33,33|2,3;DP=74;ECNT=1;GERMQ=93;MBQ=35,34;MFRL=442,380;MMQ=60,60;MPOS=15;NALOD=1.60;NLOD=11.73;POPAF=6.00;TLOD=10.76;ANN=A|intergenic_region|MODIFIER|4931408C20Rik-n-R5s209|ENSMUSG00000073722-ENSMUSG00000095256|intergenic_region|ENSMUSG00000073722-ENSMUSG00000095256|||n.26719279C>A||||||	GT:AD:AF:DP:F1R2:F2R1:SB	0/0:40,0:0.024:40:23,0:15,0:17,23,0,0	0/1:26,5:0.155:31:14,3:12,2:16,10,2,3	2985_T1
chr1	26744593	.	G	T	.	PASS	AS_FilterStatus=SITE;AS_SB_TABLE=23,29|3,2;DP=57;ECNT=1;GERMQ=93;MBQ=34,34;MFRL=422,357;MMQ=60,60;MPOS=27;NALOD=1.41;NLOD=7.43;POPAF=6.00;TLOD=10.65;ANN=T|intergenic_region|MODIFIER|4931408C20Rik-n-R5s209|ENSMUSG00000073722-ENSMUSG00000095256|intergenic_region|ENSMUSG00000073722-ENSMUSG00000095256|||n.26744593G>T||||||	GT:AD:AF:DP:F1R2:F2R1:SB	0/0:25,0:0.037:25:8,0:15,0:10,15,0,0	0/1:27,5:0.156:32:15,1:12,4:13,14,3,2	3147_T1
chr1	26765422	.	G	T	.	PASS	AS_FilterStatus=SITE;AS_SB_TABLE=31,32|1,3;DP=70;ECNT=1;GERMQ=93;MBQ=33,34;MFRL=433,538;MMQ=60,60;MPOS=34;NALOD=1.54;NLOD=9.88;POPAF=6.00;TLOD=9.44;ANN=T|intergenic_region|MODIFIER|4931408C20Rik-n-R5s209|ENSMUSG00000073722-ENSMUSG00000095256|intergenic_region|ENSMUSG00000073722-ENSMUSG00000095256|||n.26765422G>T||||||	GT:AD:AF:DP:F1R2:F2R1:SB	0/0:35,0:0.028:35:21,0:12,0:17,18,0,0	0/1:28,4:0.147:32:11,2:16,2:14,14,1,3	2985_T1
chr1	26812081	.	GT	G	.	PASS	AS_FilterStatus=SITE;AS_SB_TABLE=15,12|5,6;DP=55;ECNT=1;GERMQ=49;MBQ=33,32;MFRL=415,462;MMQ=60,60;MPOS=46;NALOD=1.10;NLOD=5.58;POPAF=6.00;RPA=20,19;RU=T;STR;STRQ=3;TLOD=8.44;ANN=G|intergenic_region|MODIFIER|4931408C20Rik-n-R5s209|ENSMUSG00000073722-ENSMUSG00000095256|intergenic_region|ENSMUSG00000073722-ENSMUSG00000095256|||n.26812082delT||||||	GT:AD:AF:DP:F1R2:F2R1:SB	0/0:19,0:0.041:19:9,0:5,0:12,7,0,0	0/1:8,11:0.554:19:2,5:3,3:3,5,5,6	613_T1
chr1	26847223	.	G	T	.	PASS	AS_FilterStatus=SITE;AS_SB_TABLE=25,31|5,3;DP=65;ECNT=1;GERMQ=93;MBQ=33,34;MFRL=459,534;MMQ=60,60;MPOS=47;NALOD=1.46;NLOD=8.38;POPAF=6.00;TLOD=21.88;ANN=T|intergenic_region|MODIFIER|4931408C20Rik-n-R5s209|ENSMUSG00000073722-ENSMUSG00000095256|intergenic_region|ENSMUSG00000073722-ENSMUSG00000095256|||n.26847223G>T||||||	GT:AD:AF:DP:F1R2:F2R1:SB	0/0:29,0:0.033:29:16,0:12,0:11,18,0,0	0/1:27,8:0.243:35:16,4:10,4:14,13,5,3	3147_T1
chr1	26855051	.	G	T	.	PASS	AS_FilterStatus=SITE;AS_SB_TABLE=17,44|2,3;DP=67;ECNT=1;GERMQ=93;MBQ=33,35;MFRL=415,451;MMQ=60,60;MPOS=31;NALOD=1.55;NLOD=10.23;POPAF=6.00;TLOD=11.85;ANN=T|intergenic_region|MODIFIER|4931408C20Rik-n-R5s209|ENSMUSG00000073722-ENSMUSG00000095256|intergenic_region|ENSMUSG00000073722-ENSMUSG00000095256|||n.26855051G>T||||||	GT:AD:AF:DP:F1R2:F2R1:SB	0/0:35,0:0.027:35:19,0:16,0:12,23,0,0	0/1:26,5:0.182:31:15,1:11,4:5,21,2,3	2985_T1
chr1	26875023	.	T	C	.	PASS	AS_FilterStatus=SITE;AS_SB_TABLE=17,21|1,2;DP=42;ECNT=1;GERMQ=83;MBQ=34,36;MFRL=464,348;MMQ=60,60;MPOS=17;NALOD=1.37;NLOD=5.67;POPAF=6.00;TLOD=7.25;ANN=C|intergenic_region|MODIFIER|4931408C20Rik-n-R5s209|ENSMUSG00000073722-ENSMUSG00000095256|intergenic_region|ENSMUSG00000073722-ENSMUSG00000095256|||n.26875023T>C||||||	GT:AD:AF:DP:F1R2:F2R1:SB	0/0:19,0:0.042:19:7,0:11,0:8,11,0,0	0/1:19,3:0.165:22:10,1:9,2:9,10,1,2	613_T1
chr1	26922777	.	TA	T	.	PASS	AS_FilterStatus=SITE;AS_SB_TABLE=25,20|11,4;DP=68;ECNT=1;GERMQ=78;MBQ=34,34;MFRL=447,444;MMQ=60,60;MPOS=35;NALOD=1.47;NLOD=8.41;POPAF=6.00;RPA=11,10;RU=A;STR;STRQ=6;TLOD=28.71;ANN=T|intergenic_region|MODIFIER|4931408C20Rik-n-R5s209|ENSMUSG00000073722-ENSMUSG00000095256|intergenic_region|ENSMUSG00000073722-ENSMUSG00000095256|||n.26922778delA||||||	GT:AD:AF:DP:F1R2:F2R1:SB	0/0:28,0:0.033:28:15,0:10,0:16,12,0,0	0/1:17,15:0.457:32:5,3:9,11:9,8,11,4	613_T1
chr1	26926251	.	CAAA	C	.	PASS	AS_FilterStatus=SITE;AS_SB_TABLE=9,10|3,3;DP=37;ECNT=1;GERMQ=21;MBQ=32,33;MFRL=444,509;MMQ=60,60;MPOS=46;NALOD=0.755;NLOD=3.20;POPAF=6.00;RPA=28,25;RU=A;STR;STRQ=93;TLOD=11.82;ANN=C|intergenic_region|MODIFIER|4931408C20Rik-n-R5s209|ENSMUSG00000073722-ENSMUSG00000095256|intergenic_region|ENSMUSG00000073722-ENSMUSG00000095256|||n.26926252_26926254delAAA||||||	GT:AD:AF:DP:F1R2:F2R1:SB	0/0:11,0:0.065:11:3,0:3,0:3,8,0,0	0/1:8,6:0.476:14:4,2:2,3:6,2,3,3	613_T1
chr1	26938934	.	CTT	C	.	PASS	AS_FilterStatus=SITE;AS_SB_TABLE=4,12|2,3;DP=37;ECNT=1;GERMQ=28;MBQ=33,33;MFRL=464,533;MMQ=60,60;MPOS=52;NALOD=0.915;NLOD=3.28;POPAF=6.00;RPA=21,19;RU=T;STR;STRQ=93;TLOD=7.48;ANN=C|intergenic_region|MODIFIER|4931408C20Rik-n-R5s209|ENSMUSG00000073722-ENSMUSG00000095256|intergenic_region|ENSMUSG00000073722-ENSMUSG00000095256|||n.26938935_26938936delTT||||||	GT:AD:AF:DP:F1R2:F2R1:SB	0/0:11,0:0.064:11:1,0:8,0:3,8,0,0	0/1:5,5:0.500:10:1,1:3,3:1,4,2,3	613_T1
chr1	26943450	.	G	T	.	PASS	AS_FilterStatus=SITE;AS_SB_TABLE=32,31|3,1;DP=69;ECNT=1;GERMQ=93;MBQ=34,35;MFRL=442,379;MMQ=60,60;MPOS=35;NALOD=1.46;NLOD=8.13;POPAF=6.00;TLOD=8.87;ANN=T|intergenic_region|MODIFIER|4931408C20Rik-n-R5s209|ENSMUSG00000073722-ENSMUSG00000095256|intergenic_region|ENSMUSG00000073722-ENSMUSG00000095256|||n.26943450G>T||||||	GT:AD:AF:DP:F1R2:F2R1:SB	0/0:27,0:0.034:27:15,0:12,0:16,11,0,0	0/1:36,4:0.119:40:19,3:16,1:16,20,3,1	2985_T1
chr1	27006985	.	C	T	.	PASS	AS_FilterStatus=SITE;AS_SB_TABLE=20,20|2,2;DP=47;ECNT=1;GERMQ=81;MBQ=34,35;MFRL=417,503;MMQ=60,60;MPOS=25;NALOD=1.40;NLOD=6.92;POPAF=6.00;TLOD=10.12;ANN=T|intergenic_region|MODIFIER|n-R5s209-Gm7846|ENSMUSG00000095256-ENSMUSG00000086240|intergenic_region|ENSMUSG00000095256-ENSMUSG00000086240|||n.27006985C>T||||||	GT:AD:AF:DP:F1R2:F2R1:SB	0/0:24,0:0.039:24:11,0:13,0:11,13,0,0	0/1:16,4:0.239:20:6,1:9,3:9,7,2,2	3147_T1
chr1	27063594	.	C	T	.	PASS	AS_FilterStatus=SITE;AS_SB_TABLE=24,25|3,5;DP=58;ECNT=1;GERMQ=92;MBQ=29,34;MFRL=483,438;MMQ=60,60;MPOS=48;NALOD=1.48;NLOD=8.72;POPAF=6.00;TLOD=22.15;ANN=T|intergenic_region|MODIFIER|n-R5s209-Gm7846|ENSMUSG00000095256-ENSMUSG00000086240|intergenic_region|ENSMUSG00000095256-ENSMUSG00000086240|||n.27063594C>T||||||	GT:AD:AF:DP:F1R2:F2R1:SB	0/0:29,0:0.032:29:17,0:10,0:15,14,0,0	0/1:20,8:0.300:28:12,3:8,5:9,11,3,5	3147_T1
chr1	27071854	.	C	T	.	PASS	AS_FilterStatus=SITE;AS_SB_TABLE=30,33|1,3;DP=68;ECNT=1;GERMQ=93;MBQ=34,36;MFRL=419,527;MMQ=60,60;MPOS=20;NALOD=1.48;NLOD=8.68;POPAF=6.00;TLOD=9.64;ANN=T|intergenic_region|MODIFIER|n-R5s209-Gm7846|ENSMUSG00000095256-ENSMUSG00000086240|intergenic_region|ENSMUSG00000095256-ENSMUSG00000086240|||n.27071854C>T||||||	GT:AD:AF:DP:F1R2:F2R1:SB	0/0:29,0:0.032:29:7,0:21,0:13,16,0,0	0/1:34,4:0.125:38:18,1:16,3:17,17,1,3	613_T1
chr1	27094338	.	AAAAAC	A	.	PASS	AS_FilterStatus=SITE;AS_SB_TABLE=27,30|2,2;DP=65;ECNT=1;GERMQ=93;MBQ=35,34;MFRL=441,470;MMQ=54,50;MPOS=42;NALOD=1.58;NLOD=10.78;POPAF=6.00;TLOD=12.49;ANN=A|intergenic_region|MODIFIER|n-R5s209-Gm7846|ENSMUSG00000095256-ENSMUSG00000086240|intergenic_region|ENSMUSG00000095256-ENSMUSG00000086240|||n.27094339_27094343delAAAAC||||||	GT:AD:AF:DP:F1R2:F2R1:SB	0/0:36,0:0.026:36:20,0:16,0:15,21,0,0	0/1:21,4:0.186:25:11,0:10,4:12,9,2,2	613_T1
chr1	27128209	.	CAA	C	.	PASS	AS_FilterStatus=SITE;AS_SB_TABLE=14,16|3,1;DP=40;ECNT=1;GERMQ=60;MBQ=32,32;MFRL=455,444;MMQ=60,60;MPOS=16;NALOD=0.733;NLOD=4.45;POPAF=6.00;RPA=12,10;RU=A;STR;STRQ=93;TLOD=9.30;ANN=C|intergenic_region|MODIFIER|n-R5s209-Gm7846|ENSMUSG00000095256-ENSMUSG00000086240|intergenic_region|ENSMUSG00000095256-ENSMUSG00000086240|||n.27128210_27128211delAA||||||	GT:AD:AF:DP:F1R2:F2R1:SB	0/0:15,0:0.052:15:4,0:8,0:8,7,0,0	0/1:15,4:0.236:19:6,3:6,1:6,9,3,1	613_T1
chr1	27134301	.	G	A	.	PASS	AS_FilterStatus=SITE;AS_SB_TABLE=20,21|2,3;DP=50;ECNT=2;GERMQ=78;MBQ=34,35;MFRL=419,434;MMQ=60,60;MPOS=30;NALOD=1.40;NLOD=6.78;POPAF=6.00;TLOD=13.78;ANN=A|intergenic_region|MODIFIER|n-R5s209-Gm7846|ENSMUSG00000095256-ENSMUSG00000086240|intergenic_region|ENSMUSG00000095256-ENSMUSG00000086240|||n.27134301G>A||||||	GT:AD:AF:DP:F1R2:F2R1:SB	0/0:24,0:0.039:24:12,0:9,0:10,14,0,0	0/1:17,5:0.251:22:8,1:8,4:10,7,2,3	3147_T1
chr1	27159550	.	C	T	.	PASS	AS_FilterStatus=SITE;AS_SB_TABLE=3,32|1,2;DP=40;ECNT=1;GERMQ=71;MBQ=28,35;MFRL=456,205;MMQ=40,40;MPOS=8;NALOD=1.13;NLOD=3.56;POPAF=6.00;TLOD=6.08;ANN=T|intergenic_region|MODIFIER|n-R5s209-Gm7846|ENSMUSG00000095256-ENSMUSG00000086240|intergenic_region|ENSMUSG00000095256-ENSMUSG00000086240|||n.27159550C>T||||||	GT:AD:AF:DP:F1R2:F2R1:SB	0/0:12,0:0.070:12:5,0:6,0:2,10,0,0	0/1:23,3:0.142:26:10,1:12,2:1,22,1,2	613_T1
chr1	27239802	.	A	AG	.	PASS	AS_FilterStatus=SITE;AS_SB_TABLE=21,29|1,5;DP=62;ECNT=1;GERMQ=93;MBQ=36,37;MFRL=432,379;MMQ=60,60;MPOS=42;NALOD=1.49;NLOD=8.42;POPAF=6.00;RPA=4,5;RU=G;STR;STRQ=93;TLOD=12.52;ANN=AG|intergenic_region|MODIFIER|n-R5s209-Gm7846|ENSMUSG00000095256-ENSMUSG00000086240|intergenic_region|ENSMUSG00000095256-ENSMUSG00000086240|||n.27239802_27239803insG||||||	GT:AD:AF:DP:F1R2:F2R1:SB	0/0:28,0:0.031:28:13,0:15,0:10,18,0,0	0/1:22,6:0.232:28:12,2:10,4:11,11,1,5	613_T1
chr1	27282434	.	G	A	.	PASS	AS_FilterStatus=SITE;AS_SB_TABLE=32,39|3,3;DP=79;ECNT=1;GERMQ=93;MBQ=32,35;MFRL=403,392;MMQ=60,56;MPOS=21;NALOD=1.71;NLOD=14.65;POPAF=6.00;TLOD=16.84;ANN=A|intergenic_region|MODIFIER|n-R5s209-Gm7846|ENSMUSG00000095256-ENSMUSG00000086240|intergenic_region|ENSMUSG00000095256-ENSMUSG00000086240|||n.27282434G>A||||||	GT:AD:AF:DP:F1R2:F2R1:SB	0/0:50,0:0.019:50:28,0:17,0:23,27,0,0	0/1:21,6:0.241:27:11,3:10,3:9,12,3,3	2985_T1
chr1	27298772	.	C	A	.	PASS	AS_FilterStatus=SITE;AS_SB_TABLE=38,32|2,2;DP=79;ECNT=1;GERMQ=93;MBQ=34,36;MFRL=437,396;MMQ=60,60;MPOS=29;NALOD=1.57;NLOD=10.53;POPAF=6.00;TLOD=9.54;ANN=A|intergenic_region|MODIFIER|n-R5s209-Gm7846|ENSMUSG00000095256-ENSMUSG00000086240|intergenic_region|ENSMUSG00000095256-ENSMUSG00000086240|||n.27298772C>A||||||	GT:AD:AF:DP:F1R2:F2R1:SB	0/0:36,0:0.026:36:19,0:17,0:18,18,0,0	0/1:34,4:0.124:38:15,3:19,1:20,14,2,2	613_T1
chr1	27349293	.	AACAC	A	.	PASS	AS_FilterStatus=SITE;AS_SB_TABLE=16,10|6,1;DP=64;ECNT=1;GERMQ=53;MBQ=34,34;MFRL=437,422;MMQ=60,60;MPOS=23;NALOD=0.918;NLOD=6.16;POPAF=6.00;RPA=26,24;RU=AC;STR;STRQ=93;TLOD=14.18;ANN=A|intergenic_region|MODIFIER|n-R5s209-Gm7846|ENSMUSG00000095256-ENSMUSG00000086240|intergenic_region|ENSMUSG00000095256-ENSMUSG00000086240|||n.27349294_27349297delACAC||||||	GT:AD:AF:DP:F1R2:F2R1:SB	0/0:21,0:0.035:21:8,0:5,0:11,10,0,0	0/1:5,7:0.583:12:2,2:3,3:5,0,6,1	613_T1
chr1	27369248	.	A	G	.	PASS	AS_FilterStatus=SITE;AS_SB_TABLE=25,24|1,3;DP=54;ECNT=1;GERMQ=93;MBQ=35,33;MFRL=434,448;MMQ=60,60;MPOS=64;NALOD=1.51;NLOD=9.33;POPAF=6.00;TLOD=10.18;ANN=G|intergenic_region|MODIFIER|n-R5s209-Gm7846|ENSMUSG00000095256-ENSMUSG00000086240|intergenic_region|ENSMUSG00000095256-ENSMUSG00000086240|||n.27369248A>G||||||	GT:AD:AF:DP:F1R2:F2R1:SB	0/0:31,0:0.030:31:12,0:19,0:16,15,0,0	0/1:18,4:0.208:22:11,2:7,2:9,9,1,3	2985_T1
chr1	27393296	.	C	T	.	PASS	AS_FilterStatus=SITE;AS_SB_TABLE=25,29|3,3;DP=64;ECNT=1;GERMQ=93;MBQ=33,34;MFRL=422,420;MMQ=60,60;MPOS=37;NALOD=1.47;NLOD=7.83;POPAF=6.00;TLOD=12.71;ANN=T|intergenic_region|MODIFIER|n-R5s209-Gm7846|ENSMUSG00000095256-ENSMUSG00000086240|intergenic_region|ENSMUSG00000095256-ENSMUSG00000086240|||n.27393296C>T||||||	GT:AD:AF:DP:F1R2:F2R1:SB	0/0:27,0:0.033:27:14,0:13,0:12,15,0,0	0/1:27,6:0.184:33:10,2:16,4:13,14,3,3	613_T1
chr1	27461691	.	CA	C	.	PASS	AS_FilterStatus=SITE;AS_SB_TABLE=42,29|3,4;DP=80;ECNT=1;GERMQ=93;MBQ=32,32;MFRL=408,472;MMQ=60,60;MPOS=41;NALOD=1.66;NLOD=12.93;POPAF=6.00;RPA=6,5;RU=A;STR;STRQ=93;TLOD=14.02;ANN=C|intergenic_region|MODIFIER|n-R5s209-Gm7846|ENSMUSG00000095256-ENSMUSG00000086240|intergenic_region|ENSMUSG00000095256-ENSMUSG00000086240|||n.27461692delA||||||	GT:AD:AF:DP:F1R2:F2R1:SB	0/0:43,0:0.022:43:18,0:24,0:28,15,0,0	0/1:28,7:0.216:35:15,1:13,6:14,14,3,4	613_T1
chr1	27490379	.	TAA	T	.	PASS	AS_FilterStatus=SITE;AS_SB_TABLE=18,20|3,4;DP=56;ECNT=1;GERMQ=67;MBQ=34,34;MFRL=494,418;MMQ=60,60;MPOS=45;NALOD=1.37;NLOD=5.71;POPAF=6.00;RPA=14,12;RU=A;STR;STRQ=93;TLOD=14.99;ANN=T|intergenic_region|MODIFIER|n-R5s209-Gm7846|ENSMUSG00000095256-ENSMUSG00000086240|intergenic_region|ENSMUSG00000095256-ENSMUSG00000086240|||n.27490380_27490381delAA||||||	GT:AD:AF:DP:F1R2:F2R1:SB	0/0:19,0:0.042:19:6,0:10,0:8,11,0,0	0/1:19,7:0.283:26:9,4:8,2:10,9,3,4	613_T1
chr1	27506937	.	AT	A	.	PASS	AS_FilterStatus=SITE;AS_SB_TABLE=35,29|2,2;DP=72;ECNT=1;GERMQ=93;MBQ=34,34;MFRL=417,413;MMQ=60,60;MPOS=29;NALOD=1.56;NLOD=9.92;POPAF=6.00;RPA=5,4;RU=T;STR;STRQ=93;TLOD=6.79;ANN=A|intergenic_region|MODIFIER|n-R5s209-Gm7846|ENSMUSG00000095256-ENSMUSG00000086240|intergenic_region|ENSMUSG00000095256-ENSMUSG00000086240|||n.27506938delT||||||	GT:AD:AF:DP:F1R2:F2R1:SB	0/0:33,0:0.027:33:15,0:16,0:21,12,0,0	0/1:31,4:0.134:35:17,3:12,1:14,17,2,2	3147_T1
chr1	27533867	.	TACAC	T	.	PASS	AS_FilterStatus=SITE;AS_SB_TABLE=20,10|2,1;DP=42;ECNT=1;GERMQ=62;MBQ=34,34;MFRL=430,450;MMQ=60,60;MPOS=52;NALOD=1.10;NLOD=5.35;POPAF=6.00;RPA=17,15;RU=AC;STR;STRQ=93;TLOD=7.82;ANN=T|intergenic_region|MODIFIER|n-R5s209-Gm7846|ENSMUSG00000095256-ENSMUSG00000086240|intergenic_region|ENSMUSG00000095256-ENSMUSG00000086240|||n.27533868_27533871delACAC||||||	GT:AD:AF:DP:F1R2:F2R1:SB	0/0:18,0:0.043:18:7,0:9,0:11,7,0,0	0/1:12,3:0.232:15:8,1:2,1:9,3,2,1	2985_T1
chr1	27632340	.	C	T	.	PASS	AS_FilterStatus=SITE;AS_SB_TABLE=38,36|2,2;DP=82;ECNT=1;GERMQ=93;MBQ=35,34;MFRL=435,393;MMQ=60,60;MPOS=23;NALOD=1.63;NLOD=12.25;POPAF=6.00;TLOD=7.80;ANN=T|intergenic_region|MODIFIER|n-R5s209-Gm7846|ENSMUSG00000095256-ENSMUSG00000086240|intergenic_region|ENSMUSG00000095256-ENSMUSG00000086240|||n.27632340C>T||||||	GT:AD:AF:DP:F1R2:F2R1:SB	0/0:41,0:0.023:41:18,0:21,0:23,18,0,0	0/1:33,4:0.127:37:17,1:16,3:15,18,2,2	613_T1
chr1	27676093	.	TACAC	T	.	PASS	AS_FilterStatus=SITE;AS_SB_TABLE=30,8|2,3;DP=63;ECNT=1;GERMQ=75;MBQ=34,33;MFRL=458,379;MMQ=60,60;MPOS=21;NALOD=1.44;NLOD=6.24;POPAF=6.00;RPA=19,17;RU=AC;STR;STRQ=93;TLOD=13.21;ANN=T|intergenic_region|MODIFIER|n-R5s209-Gm7846|ENSMUSG00000095256-ENSMUSG00000086240|intergenic_region|ENSMUSG00000095256-ENSMUSG00000086240|||n.27676094_27676097delACAC||||||	GT:AD:AF:DP:F1R2:F2R1:SB	0/0:21,0:0.037:21:13,0:6,0:17,4,0,0	0/1:17,5:0.258:22:9,5:7,0:13,4,2,3	613_T1
chr1	27724791	.	GT	G	.	PASS	AS_FilterStatus=SITE;AS_SB_TABLE=35,23|1,3;DP=65;ECNT=1;GERMQ=93;MBQ=35,33;MFRL=437,349;MMQ=60,60;MPOS=31;NALOD=1.45;NLOD=8.11;POPAF=6.00;RPA=5,4;RU=T;STR;STRQ=93;TLOD=6.78;ANN=G|intergenic_region|MODIFIER|n-R5s209-Gm7846|ENSMUSG00000095256-ENSMUSG00000086240|intergenic_region|ENSMUSG00000095256-ENSMUSG00000086240|||n.27724792delT||||||	GT:AD:AF:DP:F1R2:F2R1:SB	0/0:28,0:0.034:28:16,0:12,0:19,9,0,0	0/1:30,4:0.142:34:13,0:15,4:16,14,1,3	3147_T1
chr1	27726595	.	G	C	.	PASS	AS_FilterStatus=SITE;AS_SB_TABLE=25,28|3,2;DP=61;ECNT=1;GERMQ=93;MBQ=35,33;MFRL=467,446;MMQ=60,60;MPOS=22;NALOD=1.45;NLOD=8.13;POPAF=6.00;TLOD=12.44;ANN=C|intergenic_region|MODIFIER|n-R5s209-Gm7846|ENSMUSG00000095256-ENSMUSG00000086240|intergenic_region|ENSMUSG00000095256-ENSMUSG00000086240|||n.27726595G>C||||||	GT:AD:AF:DP:F1R2:F2R1:SB	0/0:27,0:0.034:27:12,0:15,0:15,12,0,0	0/1:26,5:0.181:31:12,4:14,1:10,16,3,2	613_T1
chr1	27729754	.	A	G	.	PASS	AS_FilterStatus=SITE;AS_SB_TABLE=24,31|3,0;DP=61;ECNT=1;GERMQ=93;MBQ=36,36;MFRL=436,503;MMQ=40,40;MPOS=51;NALOD=1.48;NLOD=8.43;POPAF=6.00;TLOD=5.73;ANN=G|intergenic_region|MODIFIER|n-R5s209-Gm7846|ENSMUSG00000095256-ENSMUSG00000086240|intergenic_region|ENSMUSG00000095256-ENSMUSG00000086240|||n.27729754A>G||||||	GT:AD:AF:DP:F1R2:F2R1:SB	0/0:28,0:0.032:28:11,0:17,0:11,17,0,0	0/1:27,3:0.124:30:14,0:13,3:13,14,3,0	2985_T1
chr1	27752595	.	ATT	A	.	PASS	AS_FilterStatus=SITE;AS_SB_TABLE=19,18|2,1;DP=47;ECNT=1;GERMQ=87;MBQ=33,34;MFRL=428,422;MMQ=60,60;MPOS=46;NALOD=1.04;NLOD=7.83;POPAF=6.00;RPA=14,12;RU=T;STR;STRQ=93;TLOD=6.81;ANN=A|intergenic_region|MODIFIER|n-R5s209-Gm7846|ENSMUSG00000095256-ENSMUSG00000086240|intergenic_region|ENSMUSG00000095256-ENSMUSG00000086240|||n.27752596_27752597delTT||||||	GT:AD:AF:DP:F1R2:F2R1:SB	0/0:26,0:0.032:26:9,0:13,0:13,13,0,0	0/1:11,3:0.249:14:6,2:5,1:6,5,2,1	3147_T1
chr1	27762241	.	AT	A	.	PASS	AS_FilterStatus=SITE;AS_SB_TABLE=24,27|2,3;DP=64;ECNT=1;GERMQ=93;MBQ=34,34;MFRL=501,534;MMQ=60,60;MPOS=31;NALOD=1.54;NLOD=8.70;POPAF=6.00;RPA=7,6;RU=T;STR;STRQ=93;TLOD=8.98;ANN=A|intergenic_region|MODIFIER|n-R5s209-Gm7846|ENSMUSG00000095256-ENSMUSG00000086240|intergenic_region|ENSMUSG00000095256-ENSMUSG00000086240|||n.27762242delT||||||	GT:AD:AF:DP:F1R2:F2R1:SB	0/0:29,0:0.029:29:17,0:12,0:14,15,0,0	0/1:22,5:0.206:27:14,1:8,4:10,12,2,3	613_T1
chr1	27769116	.	GTT	G	.	PASS	AS_FilterStatus=SITE;AS_SB_TABLE=18,24|4,2;DP=56;ECNT=1;GERMQ=83;MBQ=32,36;MFRL=443,465;MMQ=60,60;MPOS=38;NALOD=1.43;NLOD=6.59;POPAF=6.00;RPA=13,11;RU=T;STR;STRQ=93;TLOD=14.20;ANN=G|intergenic_region|MODIFIER|n-R5s209-Gm7846|ENSMUSG00000095256-ENSMUSG00000086240|intergenic_region|ENSMUSG00000095256-ENSMUSG00000086240|||n.27769117_27769118delTT||||||	GT:AD:AF:DP:F1R2:F2R1:SB	0/0:22,0:0.037:22:5,0:7,0:11,11,0,0	0/1:20,6:0.253:26:8,2:6,4:7,13,4,2	613_T1
chr1	27794545	.	C	T	.	PASS	AS_FilterStatus=SITE;AS_SB_TABLE=24,21|3,3;DP=52;ECNT=1;GERMQ=87;MBQ=34,32;MFRL=434,394;MMQ=60,60;MPOS=29;NALOD=1.42;NLOD=7.52;POPAF=6.00;TLOD=14.27;ANN=T|intergenic_region|MODIFIER|n-R5s209-Gm7846|ENSMUSG00000095256-ENSMUSG00000086240|intergenic_region|ENSMUSG00000095256-ENSMUSG00000086240|||n.27794545C>T||||||	GT:AD:AF:DP:F1R2:F2R1:SB	0/0:25,0:0.036:25:15,0:10,0:13,12,0,0	0/1:20,6:0.222:26:11,1:9,5:11,9,3,3	3147_T1
chr1	27800660	.	AT	A	.	PASS	AS_FilterStatus=SITE;AS_SB_TABLE=38,36|4,1;DP=83;ECNT=1;GERMQ=93;MBQ=34,34;MFRL=461,438;MMQ=60,60;MPOS=30;NALOD=1.54;NLOD=9.60;POPAF=6.00;RPA=6,5;RU=T;STR;STRQ=93;TLOD=8.11;ANN=A|intergenic_region|MODIFIER|n-R5s209-Gm7846|ENSMUSG00000095256-ENSMUSG00000086240|intergenic_region|ENSMUSG00000095256-ENSMUSG00000086240|||n.27800661delT||||||	GT:AD:AF:DP:F1R2:F2R1:SB	0/0:33,0:0.028:33:15,0:18,0:19,14,0,0	0/1:41,5:0.124:46:16,3:24,2:19,22,4,1	613_T1
chr1	27806624	.	C	G	.	PASS	AS_FilterStatus=SITE;AS_SB_TABLE=21,31|2,3;DP=58;ECNT=1;GERMQ=93;MBQ=35,34;MFRL=435,410;MMQ=60,60;MPOS=40;NALOD=1.50;NLOD=9.03;POPAF=6.00;TLOD=12.04;ANN=G|intergenic_region|MODIFIER|n-R5s209-Gm7846|ENSMUSG00000095256-ENSMUSG00000086240|intergenic_region|ENSMUSG00000095256-ENSMUSG00000086240|||n.27806624C>G||||||	GT:AD:AF:DP:F1R2:F2R1:SB	0/0:30,0:0.031:30:19,0:11,0:12,18,0,0	0/1:22,5:0.214:27:13,1:9,4:9,13,2,3	2985_T1
chr1	27817740	.	G	T	.	PASS	AS_FilterStatus=SITE;AS_SB_TABLE=27,32|2,1;DP=64;ECNT=1;GERMQ=93;MBQ=34,35;MFRL=446,445;MMQ=60,60;MPOS=49;NALOD=1.58;NLOD=11.13;POPAF=6.00;TLOD=7.11;ANN=T|intergenic_region|MODIFIER|n-R5s209-Gm7846|ENSMUSG00000095256-ENSMUSG00000086240|intergenic_region|ENSMUSG00000095256-ENSMUSG00000086240|||n.27817740G>T||||||	GT:AD:AF:DP:F1R2:F2R1:SB	0/0:37,0:0.026:37:19,0:17,0:18,19,0,0	0/1:22,3:0.153:25:16,1:5,2:9,13,2,1	2985_T1
chr1	27859839	.	C	G	.	PASS	AS_FilterStatus=SITE;AS_SB_TABLE=29,20|4,6;DP=60;ECNT=1;GERMQ=78;MBQ=34,35;MFRL=417,463;MMQ=60,60;MPOS=47;NALOD=1.37;NLOD=6.62;POPAF=6.00;TLOD=29.52;ANN=G|intergenic_region|MODIFIER|n-R5s209-Gm7846|ENSMUSG00000095256-ENSMUSG00000086240|intergenic_region|ENSMUSG00000095256-ENSMUSG00000086240|||n.27859839C>G||||||	GT:AD:AF:DP:F1R2:F2R1:SB	0/0:23,0:0.041:23:9,0:14,0:15,8,0,0	0/1:26,10:0.291:36:13,3:12,7:14,12,4,6	2985_T1
chr1	27876838	.	GA	G	.	PASS	AS_FilterStatus=SITE;AS_SB_TABLE=26,29|2,4;DP=65;ECNT=1;GERMQ=93;MBQ=34,34;MFRL=431,505;MMQ=60,60;MPOS=58;NALOD=1.51;NLOD=9.02;POPAF=6.00;RPA=5,4;RU=A;STR;STRQ=93;TLOD=12.32;ANN=G|intergenic_region|MODIFIER|n-R5s209-Gm7846|ENSMUSG00000095256-ENSMUSG00000086240|intergenic_region|ENSMUSG00000095256-ENSMUSG00000086240|||n.27876839delA||||||	GT:AD:AF:DP:F1R2:F2R1:SB	0/0:30,0:0.030:30:17,0:11,0:16,14,0,0	0/1:25,6:0.218:31:12,2:13,3:10,15,2,4	3147_T1
chr1	27895082	.	G	A	.	PASS	AS_FilterStatus=SITE;AS_SB_TABLE=23,26|5,0;DP=58;ECNT=1;GERMQ=93;MBQ=33,34;MFRL=398,495;MMQ=60,60;MPOS=39;NALOD=1.42;NLOD=7.43;POPAF=6.00;TLOD=12.79;ANN=A|intergenic_region|MODIFIER|n-R5s209-Gm7846|ENSMUSG00000095256-ENSMUSG00000086240|intergenic_region|ENSMUSG00000095256-ENSMUSG00000086240|||n.27895082G>A||||||	GT:AD:AF:DP:F1R2:F2R1:SB	0/0:25,0:0.037:25:11,0:12,0:10,15,0,0	0/1:24,5:0.193:29:7,2:17,3:13,11,5,0	3147_T1
chr1	27895855	.	C	A	.	PASS	AS_FilterStatus=SITE;AS_SB_TABLE=48,38|1,7;DP=94;ECNT=1;GERMQ=93;MBQ=33,35;MFRL=440,473;MMQ=60,60;MPOS=28;NALOD=1.62;NLOD=12.34;POPAF=6.00;TLOD=20.83;ANN=A|intergenic_region|MODIFIER|n-R5s209-Gm7846|ENSMUSG00000095256-ENSMUSG00000086240|intergenic_region|ENSMUSG00000095256-ENSMUSG00000086240|||n.27895855C>A||||||	GT:AD:AF:DP:F1R2:F2R1:SB	0/0:42,0:0.023:42:19,0:23,0:23,19,0,0	0/1:44,8:0.170:52:20,4:24,4:25,19,1,7	2985_T1
chr1	27902383	.	TAA	T	.	PASS	AS_FilterStatus=SITE;AS_SB_TABLE=12,10|2,4;DP=50;ECNT=1;GERMQ=35;MBQ=33,35;MFRL=460,483;MMQ=60,60;MPOS=55;NALOD=0.637;NLOD=3.93;POPAF=6.00;RPA=23,21;RU=A;STR;STRQ=93;TLOD=6.51;ANN=T|intergenic_region|MODIFIER|n-R5s209-Gm7846|ENSMUSG00000095256-ENSMUSG00000086240|intergenic_region|ENSMUSG00000095256-ENSMUSG00000086240|||n.27902384_27902385delAA||||||	GT:AD:AF:DP:F1R2:F2R1:SB	0/0:14,0:0.053:14:7,0:0,0:8,6,0,0	0/1:8,6:0.458:14:3,2:2,1:4,4,2,4	613_T1
chr1	27931882	.	G	A	.	PASS	AS_FilterStatus=SITE;AS_SB_TABLE=32,36|3,2;DP=75;ECNT=1;GERMQ=93;MBQ=35,36;MFRL=459,459;MMQ=60,60;MPOS=45;NALOD=1.54;NLOD=9.93;POPAF=6.00;TLOD=12.76;ANN=A|intergenic_region|MODIFIER|n-R5s209-Gm7846|ENSMUSG00000095256-ENSMUSG00000086240|intergenic_region|ENSMUSG00000095256-ENSMUSG00000086240|||n.27931882G>A||||||	GT:AD:AF:DP:F1R2:F2R1:SB	0/0:33,0:0.028:33:18,0:14,0:14,19,0,0	0/1:35,5:0.143:40:17,2:15,3:18,17,3,2	613_T1
chr1	28051697	.	C	T	.	PASS	AS_FilterStatus=SITE;AS_SB_TABLE=41,36|3,3;DP=87;ECNT=1;GERMQ=93;MBQ=35,34;MFRL=435,497;MMQ=60,60;MPOS=29;NALOD=1.64;NLOD=12.29;POPAF=6.00;TLOD=14.98;ANN=T|intergenic_region|MODIFIER|n-R5s209-Gm7846|ENSMUSG00000095256-ENSMUSG00000086240|intergenic_region|ENSMUSG00000095256-ENSMUSG00000086240|||n.28051697C>T||||||	GT:AD:AF:DP:F1R2:F2R1:SB	0/0:41,0:0.022:41:23,0:17,0:23,18,0,0	0/1:36,6:0.159:42:16,3:20,3:18,18,3,3	613_T1
chr1	28070660	.	GT	G	.	PASS	AS_FilterStatus=SITE;AS_SB_TABLE=19,17|10,6;DP=63;ECNT=1;GERMQ=57;MBQ=34,35;MFRL=401,418;MMQ=60,60;MPOS=41;NALOD=1.40;NLOD=6.27;POPAF=6.00;RPA=13,12;RU=T;STR;STRQ=18;TLOD=32.57;ANN=G|intergenic_region|MODIFIER|n-R5s209-Gm7846|ENSMUSG00000095256-ENSMUSG00000086240|intergenic_region|ENSMUSG00000095256-ENSMUSG00000086240|||n.28070661delT||||||	GT:AD:AF:DP:F1R2:F2R1:SB	0/0:21,0:0.039:21:8,0:8,0:9,12,0,0	0/1:15,16:0.518:31:8,11:5,4:10,5,10,6	2985_T1
chr1	28085307	.	G	A	.	PASS	AS_FilterStatus=SITE;AS_SB_TABLE=38,24|4,2;DP=69;ECNT=1;GERMQ=93;MBQ=35,35;MFRL=438,408;MMQ=60,60;MPOS=28;NALOD=1.60;NLOD=11.69;POPAF=6.00;TLOD=16.72;ANN=A|intergenic_region|MODIFIER|n-R5s209-Gm7846|ENSMUSG00000095256-ENSMUSG00000086240|intergenic_region|ENSMUSG00000095256-ENSMUSG00000086240|||n.28085307G>A||||||	GT:AD:AF:DP:F1R2:F2R1:SB	0/0:39,0:0.024:39:17,0:21,0:26,13,0,0	0/1:23,6:0.226:29:12,2:10,4:12,11,4,2	2985_T1
chr1	28085865	.	G	A	.	PASS	AS_FilterStatus=SITE;AS_SB_TABLE=44,23|2,3;DP=72;ECNT=1;GERMQ=93;MBQ=35,35;MFRL=453,463;MMQ=60,60;MPOS=50;NALOD=1.68;NLOD=14.10;POPAF=6.00;TLOD=13.65;ANN=A|intergenic_region|MODIFIER|n-R5s209-Gm7846|ENSMUSG00000095256-ENSMUSG00000086240|intergenic_region|ENSMUSG00000095256-ENSMUSG00000086240|||n.28085865G>A||||||	GT:AD:AF:DP:F1R2:F2R1:SB	0/0:47,0:0.020:47:31,0:15,0:32,15,0,0	0/1:20,5:0.222:25:5,2:15,3:12,8,2,3	2985_T1
chr1	28139421	.	TTTTTTCATTTTTTTGGAGC	T	.	PASS	AS_FilterStatus=SITE;AS_SB_TABLE=27,31|2,3;DP=65;ECNT=1;GERMQ=93;MBQ=34,34;MFRL=436,355;MMQ=60,60;MPOS=18;NALOD=1.49;NLOD=8.59;POPAF=6.00;TLOD=15.66;ANN=T|intergenic_region|MODIFIER|n-R5s209-Gm7846|ENSMUSG00000095256-ENSMUSG00000086240|intergenic_region|ENSMUSG00000095256-ENSMUSG00000086240|||n.28139422_28139440delTTTTTCATTTTTTTGGAGC||||||	GT:AD:AF:DP:F1R2:F2R1:SB	0/0:30,0:0.031:30:14,0:14,0:13,17,0,0	0/1:28,5:0.172:33:12,3:12,2:14,14,2,3	3147_T1
chr1	28195559	.	TA	T	.	PASS	AS_FilterStatus=SITE;AS_SB_TABLE=22,23|4,4;DP=60;ECNT=1;GERMQ=85;MBQ=34,34;MFRL=440,477;MMQ=60,60;MPOS=40;NALOD=1.46;NLOD=7.50;POPAF=6.00;RPA=6,5;RU=A;STR;STRQ=93;TLOD=17.51;ANN=T|intergenic_region|MODIFIER|n-R5s209-Gm7846|ENSMUSG00000095256-ENSMUSG00000086240|intergenic_region|ENSMUSG00000095256-ENSMUSG00000086240|||n.28195560delA||||||	GT:AD:AF:DP:F1R2:F2R1:SB	0/0:25,0:0.034:25:14,0:11,0:16,9,0,0	0/1:20,8:0.299:28:8,5:12,3:6,14,4,4	2985_T1
chr1	28196340	.	TA	T	.	PASS	AS_FilterStatus=SITE;AS_SB_TABLE=28,39|3,1;DP=73;ECNT=1;GERMQ=93;MBQ=34,37;MFRL=466,507;MMQ=60,60;MPOS=41;NALOD=1.58;NLOD=10.82;POPAF=6.00;RPA=7,6;RU=A;STR;STRQ=93;TLOD=6.25;ANN=T|intergenic_region|MODIFIER|n-R5s209-Gm7846|ENSMUSG00000095256-ENSMUSG00000086240|intergenic_region|ENSMUSG00000095256-ENSMUSG00000086240|||n.28196341delA||||||	GT:AD:AF:DP:F1R2:F2R1:SB	0/0:36,0:0.026:36:11,0:24,0:19,17,0,0	0/1:31,4:0.134:35:17,4:12,0:9,22,3,1	3147_T1
chr1	28205315	.	AT	A	.	PASS	AS_FilterStatus=SITE;AS_SB_TABLE=37,34|5,4;DP=85;ECNT=1;GERMQ=93;MBQ=34,33;MFRL=439,428;MMQ=60,60;MPOS=51;NALOD=1.63;NLOD=12.02;POPAF=6.00;RPA=7,6;RU=T;STR;STRQ=93;TLOD=18.12;ANN=A|intergenic_region|MODIFIER|n-R5s209-Gm7846|ENSMUSG00000095256-ENSMUSG00000086240|intergenic_region|ENSMUSG00000095256-ENSMUSG00000086240|||n.28205316delT||||||	GT:AD:AF:DP:F1R2:F2R1:SB	0/0:41,0:0.023:41:21,0:19,0:22,19,0,0	0/1:30,9:0.243:39:15,5:15,4:15,15,5,4	2985_T1
chr1	28214459	.	A	G	.	PASS	AS_FilterStatus=SITE;AS_SB_TABLE=32,31|3,3;DP=72;ECNT=1;GERMQ=93;MBQ=35,30;MFRL=422,420;MMQ=60,60;MPOS=41;NALOD=1.64;NLOD=12.64;POPAF=6.00;TLOD=11.84;ANN=G|intergenic_region|MODIFIER|n-R5s209-Gm7846|ENSMUSG00000095256-ENSMUSG00000086240|intergenic_region|ENSMUSG00000095256-ENSMUSG00000086240|||n.28214459A>G||||||	GT:AD:AF:DP:F1R2:F2R1:SB	0/0:42,0:0.023:42:18,0:24,0:24,18,0,0	0/1:21,6:0.231:27:9,2:12,3:8,13,3,3	2985_T1
chr1	28215533	.	C	T	.	PASS	AS_FilterStatus=SITE;AS_SB_TABLE=45,30|2,1;DP=79;ECNT=1;GERMQ=93;MBQ=34,34;MFRL=439,461;MMQ=60,60;MPOS=39;NALOD=1.62;NLOD=12.04;POPAF=6.00;TLOD=6.26;ANN=T|intergenic_region|MODIFIER|n-R5s209-Gm7846|ENSMUSG00000095256-ENSMUSG00000086240|intergenic_region|ENSMUSG00000095256-ENSMUSG00000086240|||n.28215533C>T||||||	GT:AD:AF:DP:F1R2:F2R1:SB	0/0:41,0:0.024:41:22,0:19,0:26,15,0,0	0/1:34,3:0.102:37:16,1:18,2:19,15,2,1	613_T1
chr1	28242215	.	AT	A	.	PASS	AS_FilterStatus=SITE;AS_SB_TABLE=29,39|3,2;DP=79;ECNT=1;GERMQ=93;MBQ=34,34;MFRL=463,535;MMQ=60,60;MPOS=42;NALOD=1.61;NLOD=11.42;POPAF=6.00;RPA=6,5;RU=T;STR;STRQ=93;TLOD=8.83;ANN=A|intergenic_region|MODIFIER|n-R5s209-Gm7846|ENSMUSG00000095256-ENSMUSG00000086240|intergenic_region|ENSMUSG00000095256-ENSMUSG00000086240|||n.28242216delT||||||	GT:AD:AF:DP:F1R2:F2R1:SB	0/0:38,0:0.024:38:22,0:15,0:16,22,0,0	0/1:30,5:0.161:35:11,3:18,2:13,17,3,2	613_T1
chr1	28278229	.	GAA	G	.	PASS	AS_FilterStatus=SITE;AS_SB_TABLE=27,26|3,2;DP=72;ECNT=1;GERMQ=93;MBQ=34,37;MFRL=463,450;MMQ=60,60;MPOS=11;NALOD=1.54;NLOD=8.69;POPAF=6.00;RPA=12,10;RU=A;STR;STRQ=93;TLOD=10.00;ANN=G|intergenic_region|MODIFIER|n-R5s209-Gm7846|ENSMUSG00000095256-ENSMUSG00000086240|intergenic_region|ENSMUSG00000095256-ENSMUSG00000086240|||n.28278230_28278231delAA||||||	GT:AD:AF:DP:F1R2:F2R1:SB	0/0:30,0:0.029:30:11,0:17,0:16,14,0,0	0/1:23,5:0.195:28:11,0:11,5:11,12,3,2	613_T1
chr1	28301671	.	C	A	.	PASS	AS_FilterStatus=SITE;AS_SB_TABLE=19,23|3,1;DP=46;ECNT=1;GERMQ=81;MBQ=33,35;MFRL=400,396;MMQ=60,60;MPOS=39;NALOD=1.32;NLOD=6.02;POPAF=6.00;TLOD=10.28;ANN=A|intergenic_region|MODIFIER|n-R5s209-Gm7846|ENSMUSG00000095256-ENSMUSG00000086240|intergenic_region|ENSMUSG00000095256-ENSMUSG00000086240|||n.28301671C>A||||||	GT:AD:AF:DP:F1R2:F2R1:SB	0/0:22,0:0.045:22:15,0:7,0:12,10,0,0	0/1:20,4:0.192:24:14,3:6,1:7,13,3,1	3147_T1
chr1	28327886	.	C	T	.	PASS	AS_FilterStatus=SITE;AS_SB_TABLE=37,44|0,3;DP=85;ECNT=2;GERMQ=93;MBQ=35,36;MFRL=442,578;MMQ=60,60;MPOS=24;NALOD=1.72;NLOD=15.30;POPAF=6.00;TLOD=6.91;ANN=T|intergenic_region|MODIFIER|n-R5s209-Gm7846|ENSMUSG00000095256-ENSMUSG00000086240|intergenic_region|ENSMUSG00000095256-ENSMUSG00000086240|||n.28327886C>T||||||	GT:AD:AF:DP:F1R2:F2R1:SB	0/0:52,0:0.019:52:29,0:22,0:24,28,0,0	0/1:29,3:0.117:32:16,1:13,2:13,16,0,3	2985_T1
chr1	28331851	.	AT	A	.	PASS	AS_FilterStatus=SITE;AS_SB_TABLE=27,45|2,2;DP=81;ECNT=1;GERMQ=93;MBQ=35,34;MFRL=428,371;MMQ=60,60;MPOS=17;NALOD=1.68;NLOD=13.53;POPAF=6.00;RPA=5,4;RU=T;STR;STRQ=93;TLOD=7.12;ANN=A|intergenic_region|MODIFIER|n-R5s209-Gm7846|ENSMUSG00000095256-ENSMUSG00000086240|intergenic_region|ENSMUSG00000095256-ENSMUSG00000086240|||n.28331852delT||||||	GT:AD:AF:DP:F1R2:F2R1:SB	0/0:45,0:0.021:45:19,0:25,0:15,30,0,0	0/1:27,4:0.154:31:11,2:16,1:12,15,2,2	2985_T1
chr1	28336001	.	GTT	G	.	PASS	AS_FilterStatus=SITE;AS_SB_TABLE=20,23|3,0;DP=56;ECNT=1;GERMQ=93;MBQ=34,36;MFRL=430,452;MMQ=60,60;MPOS=33;NALOD=1.01;NLOD=7.19;POPAF=6.00;RPA=15,13;RU=T;STR;STRQ=93;TLOD=6.95;ANN=G|intergenic_region|MODIFIER|n-R5s209-Gm7846|ENSMUSG00000095256-ENSMUSG00000086240|intergenic_region|ENSMUSG00000095256-ENSMUSG00000086240|||n.28336002_28336003delTT||||||	GT:AD:AF:DP:F1R2:F2R1:SB	0/0:24,0:0.034:24:6,0:11,0:12,12,0,0	0/1:19,3:0.168:22:6,2:7,1:8,11,3,0	613_T1
chr1	28384126	.	A	G	.	PASS	AS_FilterStatus=SITE;AS_SB_TABLE=32,35|1,2;DP=75;ECNT=1;GERMQ=93;MBQ=34,32;MFRL=493,466;MMQ=60,60;MPOS=65;NALOD=1.56;NLOD=9.89;POPAF=6.00;TLOD=5.97;ANN=G|intergenic_region|MODIFIER|n-R5s209-Gm7846|ENSMUSG00000095256-ENSMUSG00000086240|intergenic_region|ENSMUSG00000095256-ENSMUSG00000086240|||n.28384126A>G||||||	GT:AD:AF:DP:F1R2:F2R1:SB	0/0:33,0:0.027:33:11,0:21,0:20,13,0,0	0/1:34,3:0.103:37:14,2:19,1:12,22,1,2	613_T1
chr1	28415637	.	TG	T	.	PASS	AS_FilterStatus=SITE;AS_SB_TABLE=14,16|4,3;DP=47;ECNT=1;GERMQ=49;MBQ=34,34;MFRL=410,441;MMQ=60,60;MPOS=20;NALOD=1.29;NLOD=4.73;POPAF=6.00;TLOD=11.67;ANN=T|intergenic_region|MODIFIER|n-R5s209-Gm7846|ENSMUSG00000095256-ENSMUSG00000086240|intergenic_region|ENSMUSG00000095256-ENSMUSG00000086240|||n.28415638delG||||||	GT:AD:AF:DP:F1R2:F2R1:SB	0/0:16,0:0.050:16:8,0:8,0:8,8,0,0	0/1:14,7:0.348:21:8,4:5,2:6,8,4,3	613_T1
chr1	28443757	.	C	T	.	PASS	AS_FilterStatus=SITE;AS_SB_TABLE=27,28|5,2;DP=64;ECNT=1;GERMQ=93;MBQ=33,35;MFRL=445,496;MMQ=60,60;MPOS=20;NALOD=1.42;NLOD=7.52;POPAF=6.00;TLOD=19.16;ANN=T|intergenic_region|MODIFIER|n-R5s209-Gm7846|ENSMUSG00000095256-ENSMUSG00000086240|intergenic_region|ENSMUSG00000095256-ENSMUSG00000086240|||n.28443757C>T||||||	GT:AD:AF:DP:F1R2:F2R1:SB	0/0:26,0:0.036:26:10,0:16,0:14,12,0,0	0/1:29,7:0.211:36:11,5:17,2:13,16,5,2	613_T1
chr1	28461164	.	G	T	.	PASS	AS_FilterStatus=SITE;AS_SB_TABLE=18,15|6,1;DP=40;ECNT=1;GERMQ=57;MBQ=34,34;MFRL=452,452;MMQ=60,60;MPOS=44;NALOD=1.32;NLOD=5.93;POPAF=6.00;TLOD=15.27;ANN=T|intergenic_region|MODIFIER|n-R5s209-Gm7846|ENSMUSG00000095256-ENSMUSG00000086240|intergenic_region|ENSMUSG00000095256-ENSMUSG00000086240|||n.28461164G>T||||||	GT:AD:AF:DP:F1R2:F2R1:SB	0/0:20,0:0.046:20:13,0:5,0:13,7,0,0	0/1:13,7:0.350:20:8,1:4,4:5,8,6,1	2985_T1
chr1	28475827	.	G	A	.	PASS	AS_FilterStatus=SITE;AS_SB_TABLE=43,46|0,3;DP=94;ECNT=1;GERMQ=93;MBQ=32,35;MFRL=446,481;MMQ=60,60;MPOS=26;NALOD=1.65;NLOD=13.15;POPAF=6.00;TLOD=5.97;ANN=A|intergenic_region|MODIFIER|n-R5s209-Gm7846|ENSMUSG00000095256-ENSMUSG00000086240|intergenic_region|ENSMUSG00000095256-ENSMUSG00000086240|||n.28475827G>A||||||	GT:AD:AF:DP:F1R2:F2R1:SB	0/0:45,0:0.022:45:19,0:24,0:24,21,0,0	0/1:44,3:0.083:47:22,1:22,2:19,25,0,3	613_T1
chr1	28483671	.	GTT	G	.	PASS	AS_FilterStatus=SITE;AS_SB_TABLE=13,25|1,2;DP=52;ECNT=1;GERMQ=83;MBQ=19,32;MFRL=429,513;MMQ=60,60;MPOS=36;NALOD=1.18;NLOD=7.03;POPAF=6.00;RPA=15,13;RU=T;STR;STRQ=93;TLOD=5.82;ANN=G|intergenic_region|MODIFIER|n-R5s209-Gm7846|ENSMUSG00000095256-ENSMUSG00000086240|intergenic_region|ENSMUSG00000095256-ENSMUSG00000086240|||n.28483672_28483673delTT||||||	GT:AD:AF:DP:F1R2:F2R1:SB	0/0:25,0:0.036:25:6,0:3,0:7,18,0,0	0/1:13,3:0.228:16:5,0:3,3:6,7,1,2	3147_T1
chr1	28489752	.	T	C	.	PASS	AS_FilterStatus=SITE;AS_SB_TABLE=31,27|2,2;DP=63;ECNT=2;GERMQ=93;MBQ=35,28;MFRL=436,408;MMQ=60,60;MPOS=26;NALOD=1.35;NLOD=6.32;POPAF=6.00;TLOD=6.19;ANN=C|intergenic_region|MODIFIER|n-R5s209-Gm7846|ENSMUSG00000095256-ENSMUSG00000086240|intergenic_region|ENSMUSG00000095256-ENSMUSG00000086240|||n.28489752T>C||||||	GT:AD:AF:DP:F1R2:F2R1:SB	0/0:21,0:0.043:21:10,0:11,0:10,11,0,0	0/1:37,4:0.115:41:20,2:17,2:21,16,2,2	613_T1
chr1	28511568	.	AT	A	.	PASS	AS_FilterStatus=SITE;AS_SB_TABLE=36,27|4,2;DP=74;ECNT=1;GERMQ=93;MBQ=34,33;MFRL=440,458;MMQ=60,60;MPOS=34;NALOD=1.60;NLOD=11.12;POPAF=6.00;RPA=7,6;RU=T;STR;STRQ=93;TLOD=11.40;ANN=A|intergenic_region|MODIFIER|n-R5s209-Gm7846|ENSMUSG00000095256-ENSMUSG00000086240|intergenic_region|ENSMUSG00000095256-ENSMUSG00000086240|||n.28511569delT||||||	GT:AD:AF:DP:F1R2:F2R1:SB	0/0:37,0:0.025:37:19,0:18,0:24,13,0,0	0/1:26,6:0.211:32:14,3:12,3:12,14,4,2	2985_T1
chr1	28567216	.	TA	T	.	PASS	AS_FilterStatus=SITE;AS_SB_TABLE=33,39|3,2;DP=84;ECNT=1;GERMQ=93;MBQ=34,34;MFRL=443,462;MMQ=60,60;MPOS=35;NALOD=1.66;NLOD=12.92;POPAF=6.00;RPA=7,6;RU=A;STR;STRQ=93;TLOD=8.73;ANN=T|intergenic_region|MODIFIER|n-R5s209-Gm7846|ENSMUSG00000095256-ENSMUSG00000086240|intergenic_region|ENSMUSG00000095256-ENSMUSG00000086240|||n.28567217delA||||||	GT:AD:AF:DP:F1R2:F2R1:SB	0/0:45,0:0.022:45:31,0:14,0:17,28,0,0	0/1:27,5:0.175:32:11,3:16,2:16,11,3,2	613_T1
chr1	28598284	.	CA	C	.	PASS	AS_FilterStatus=SITE;AS_SB_TABLE=28,29|6,1;DP=72;ECNT=1;GERMQ=93;MBQ=34,33;MFRL=472,436;MMQ=60,60;MPOS=42;NALOD=1.54;NLOD=9.01;POPAF=6.00;RPA=7,6;RU=A;STR;STRQ=93;TLOD=13.53;ANN=C|intergenic_region|MODIFIER|Gm7846-Gm597|ENSMUSG00000086240-ENSMUSG00000048411|intergenic_region|ENSMUSG00000086240-ENSMUSG00000048411|||n.28598285delA||||||	GT:AD:AF:DP:F1R2:F2R1:SB	0/0:30,0:0.029:30:15,0:15,0:13,17,0,0	0/1:27,7:0.221:34:10,3:15,4:15,12,6,1	613_T1
chr1	28602953	.	C	T	.	PASS	AS_FilterStatus=SITE;AS_SB_TABLE=27,10|2,3;DP=43;ECNT=2;GERMQ=74;MBQ=32,33;MFRL=418,450;MMQ=60,60;MPOS=45;NALOD=0.695;NLOD=6.39;POPAF=6.00;TLOD=10.32;ANN=T|intergenic_region|MODIFIER|Gm7846-Gm597|ENSMUSG00000086240-ENSMUSG00000048411|intergenic_region|ENSMUSG00000086240-ENSMUSG00000048411|||n.28602953C>T||||||	GT:AD:AF:DP:F1R2:F2R1:PGT:PID:PS:SB	0|0:21,0:0.039:21:12,0:8,0:1|0:28602915_TACAC_T:28602915:15,6,0,0	1|0:16,5:0.279:21:5,4:11,1:1|0:28602915_TACAC_T:28602915:12,4,2,3	2985_T1
chr1	28633328	.	TAAAA	T	.	PASS	AS_FilterStatus=SITE;AS_SB_TABLE=18,13|2,1;DP=50;ECNT=1;GERMQ=62;MBQ=34,34;MFRL=471,437;MMQ=60,60;MPOS=29;NALOD=0.947;NLOD=3.55;POPAF=6.00;RPA=21,17;RU=A;STR;STRQ=93;TLOD=7.55;ANN=T|intergenic_region|MODIFIER|Gm7846-Gm597|ENSMUSG00000086240-ENSMUSG00000048411|intergenic_region|ENSMUSG00000086240-ENSMUSG00000048411|||n.28633329_28633332delAAAA||||||	GT:AD:AF:DP:F1R2:F2R1:SB	0/0:12,0:0.059:12:6,0:1,0:8,4,0,0	0/1:19,3:0.164:22:8,2:4,1:10,9,2,1	613_T1
chr1	28635573	.	C	A	.	PASS	AS_FilterStatus=SITE;AS_SB_TABLE=32,14|1,4;DP=54;ECNT=1;GERMQ=93;MBQ=33,35;MFRL=403,391;MMQ=60,60;MPOS=48;NALOD=1.43;NLOD=7.82;POPAF=6.00;TLOD=13.52;ANN=A|intergenic_region|MODIFIER|Gm7846-Gm597|ENSMUSG00000086240-ENSMUSG00000048411|intergenic_region|ENSMUSG00000086240-ENSMUSG00000048411|||n.28635573C>A||||||	GT:AD:AF:DP:F1R2:F2R1:SB	0/0:26,0:0.036:26:17,0:8,0:18,8,0,0	0/1:20,5:0.221:25:9,2:10,3:14,6,1,4	3147_T1
chr1	28638583	.	GA	G	.	PASS	AS_FilterStatus=SITE;AS_SB_TABLE=22,21|0,4;DP=49;ECNT=1;GERMQ=85;MBQ=34,33;MFRL=430,507;MMQ=60,60;MPOS=43;NALOD=1.29;NLOD=5.41;POPAF=6.00;RPA=6,5;RU=A;STR;STRQ=93;TLOD=7.02;ANN=G|intergenic_region|MODIFIER|Gm7846-Gm597|ENSMUSG00000086240-ENSMUSG00000048411|intergenic_region|ENSMUSG00000086240-ENSMUSG00000048411|||n.28638584delA||||||	GT:AD:AF:DP:F1R2:F2R1:SB	0/0:19,0:0.049:19:8,0:7,0:9,10,0,0	0/1:24,4:0.166:28:17,4:5,0:13,11,0,4	3147_T1
chr1	28647271	.	ACC	GGT	.	PASS	AS_FilterStatus=SITE;AS_SB_TABLE=21,21|4,0;DP=47;ECNT=1;GERMQ=91;MBQ=35,28;MFRL=478,277;MMQ=60,60;MPOS=28;NALOD=1.16;NLOD=8.08;POPAF=6.00;TLOD=7.77;ANN=GGT|intergenic_region|MODIFIER|Gm7846-Gm597|ENSMUSG00000086240-ENSMUSG00000048411|intergenic_region|ENSMUSG00000086240-ENSMUSG00000048411|||n.28647271_28647273delACCinsGGT||||||	GT:AD:AF:DP:F1R2:F2R1:SB	0/0:27,0:0.035:27:12,0:12,0:16,11,0,0	0/1:15,4:0.240:19:6,3:7,0:5,10,4,0	3147_T1
chr1	28713083	.	AGTGTGT	A	.	PASS	AS_FilterStatus=SITE;AS_SB_TABLE=9,17|1,2;DP=49;ECNT=1;GERMQ=46;MBQ=22,33;MFRL=453,410;MMQ=60,60;MPOS=64;NALOD=0.989;NLOD=4.14;POPAF=6.00;RPA=22,19;RU=GT;STR;STRQ=93;TLOD=7.33;ANN=A|intergenic_region|MODIFIER|Gm7846-Gm597|ENSMUSG00000086240-ENSMUSG00000048411|intergenic_region|ENSMUSG00000086240-ENSMUSG00000048411|||n.28713084_28713089delGTGTGT||||||	GT:AD:AF:DP:F1R2:F2R1:SB	0/0:14,0:0.053:14:4,0:4,0:7,7,0,0	0/1:12,3:0.234:15:0,1:4,2:2,10,1,2	613_T1
chr1	28769776	.	G	T	.	PASS	AS_FilterStatus=SITE;AS_SB_TABLE=40,35|2,2;DP=86;ECNT=1;GERMQ=93;MBQ=35,36;MFRL=423,490;MMQ=60,60;MPOS=19;NALOD=1.62;NLOD=11.69;POPAF=6.00;TLOD=9.52;ANN=T|intergenic_region|MODIFIER|Gm7846-Gm597|ENSMUSG00000086240-ENSMUSG00000048411|intergenic_region|ENSMUSG00000086240-ENSMUSG00000048411|||n.28769776G>T||||||	GT:AD:AF:DP:F1R2:F2R1:SB	0/0:39,0:0.024:39:14,0:23,0:21,18,0,0	0/1:36,4:0.118:40:22,1:14,3:19,17,2,2	613_T1
chr1	28770528	.	TAA	T	.	PASS	AS_FilterStatus=SITE;AS_SB_TABLE=6,19|2,2;DP=42;ECNT=1;GERMQ=50;MBQ=33,30;MFRL=401,430;MMQ=60,60;MPOS=52;NALOD=0.992;NLOD=4.48;POPAF=6.00;RPA=20,18;RU=A;STR;STRQ=93;TLOD=5.92;ANN=T|intergenic_region|MODIFIER|Gm7846-Gm597|ENSMUSG00000086240-ENSMUSG00000048411|intergenic_region|ENSMUSG00000086240-ENSMUSG00000048411|||n.28770529_28770530delAA||||||	GT:AD:AF:DP:F1R2:F2R1:SB	0/0:15,0:0.052:15:3,0:6,0:3,12,0,0	0/1:10,4:0.324:14:2,0:2,3:3,7,2,2	613_T1
chr1	28811456	.	G	A	.	PASS	AS_FilterStatus=SITE;AS_SB_TABLE=35,43|1,5;DP=86;ECNT=1;GERMQ=93;MBQ=32,34;MFRL=419,353;MMQ=60,60;MPOS=26;NALOD=1.56;NLOD=10.49;POPAF=6.00;TLOD=14.89;ANN=A|intergenic_region|MODIFIER|Gm5697-Gm6462|ENSMUSG00000081557-ENSMUSG00000058590|intergenic_region|ENSMUSG00000081557-ENSMUSG00000058590|||n.28811456G>A||||||	GT:AD:AF:DP:F1R2:F2R1:SB	0/0:36,0:0.027:36:18,0:17,0:18,18,0,0	0/1:42,6:0.149:48:25,2:16,4:17,25,1,5	613_T1
chr1	28893137	.	C	A	.	PASS	AS_FilterStatus=SITE;AS_SB_TABLE=26,18|3,3;DP=53;ECNT=1;GERMQ=83;MBQ=34,34;MFRL=462,441;MMQ=60,60;MPOS=39;NALOD=1.33;NLOD=6.02;POPAF=6.00;TLOD=16.10;ANN=A|intergenic_region|MODIFIER|Gm5697-Gm6462|ENSMUSG00000081557-ENSMUSG00000058590|intergenic_region|ENSMUSG00000081557-ENSMUSG00000058590|||n.28893137C>A||||||	GT:AD:AF:DP:F1R2:F2R1:SB	0/0:20,0:0.045:20:5,0:15,0:12,8,0,0	0/1:24,6:0.219:30:10,2:13,4:14,10,3,3	2985_T1
chr1	28964486	.	T	C	.	PASS	AS_FilterStatus=SITE;AS_SB_TABLE=23,27|1,2;DP=54;ECNT=1;GERMQ=93;MBQ=34,29;MFRL=432,417;MMQ=60,60;MPOS=37;NALOD=1.50;NLOD=9.03;POPAF=6.00;TLOD=5.62;ANN=C|intergenic_region|MODIFIER|Gm6462-Gm25586|ENSMUSG00000058590-ENSMUSG00000064433|intergenic_region|ENSMUSG00000058590-ENSMUSG00000064433|||n.28964486T>C||||||	GT:AD:AF:DP:F1R2:F2R1:SB	0/0:30,0:0.031:30:15,0:15,0:17,13,0,0	0/1:20,3:0.161:23:12,1:6,2:6,14,1,2	3147_T1
chr1	28997346	.	CTT	C	.	PASS	AS_FilterStatus=SITE;AS_SB_TABLE=14,8|4,1;DP=44;ECNT=1;GERMQ=36;MBQ=33,33;MFRL=435,395;MMQ=60,60;MPOS=28;NALOD=0.924;NLOD=3.28;POPAF=6.00;RPA=23,21;RU=T;STR;STRQ=93;TLOD=7.00;ANN=C|intergenic_region|MODIFIER|Gm6462-Gm25586|ENSMUSG00000058590-ENSMUSG00000064433|intergenic_region|ENSMUSG00000058590-ENSMUSG00000064433|||n.28997347_28997348delTT||||||	GT:AD:AF:DP:F1R2:F2R1:SB	0/0:11,0:0.064:11:9,0:1,0:8,3,0,0	0/1:11,5:0.331:16:5,4:4,1:6,5,4,1	613_T1
chr1	29066820	.	G	A	.	PASS	AS_FilterStatus=SITE;AS_SB_TABLE=28,29|3,3;DP=65;ECNT=1;GERMQ=93;MBQ=28,35;MFRL=426,392;MMQ=60,60;MPOS=26;NALOD=1.43;NLOD=7.82;POPAF=6.00;TLOD=15.88;ANN=A|intergenic_region|MODIFIER|Gm6462-Gm25586|ENSMUSG00000058590-ENSMUSG00000064433|intergenic_region|ENSMUSG00000058590-ENSMUSG00000064433|||n.29066820G>A||||||	GT:AD:AF:DP:F1R2:F2R1:SB	0/0:29,0:0.036:29:18,0:11,0:13,16,0,0	0/1:28,6:0.194:34:12,2:15,4:15,13,3,3	3147_T1
chr1	29078277	.	A	T	.	PASS	AS_FilterStatus=SITE;AS_SB_TABLE=29,25|3,5;DP=66;ECNT=1;GERMQ=93;MBQ=34,34;MFRL=432,414;MMQ=60,60;MPOS=41;NALOD=1.46;NLOD=7.83;POPAF=6.00;TLOD=18.74;ANN=T|intergenic_region|MODIFIER|Gm6462-Gm25586|ENSMUSG00000058590-ENSMUSG00000064433|intergenic_region|ENSMUSG00000058590-ENSMUSG00000064433|||n.29078277A>T||||||	GT:AD:AF:DP:F1R2:F2R1:SB	0/0:28,0:0.034:28:19,0:9,0:14,14,0,0	0/1:26,8:0.251:34:10,4:14,4:15,11,3,5	613_T1
chr1	29080631	.	TACAC	T	.	PASS	AS_FilterStatus=SITE;AS_SB_TABLE=24,18|3,2;DP=61;ECNT=1;GERMQ=93;MBQ=34,33;MFRL=428,426;MMQ=60,60;MPOS=41;NALOD=1.11;NLOD=9.51;POPAF=6.00;RPA=18,16;RU=AC;STR;STRQ=93;TLOD=13.38;ANN=T|intergenic_region|MODIFIER|Gm6462-Gm25586|ENSMUSG00000058590-ENSMUSG00000064433|intergenic_region|ENSMUSG00000058590-ENSMUSG00000064433|||n.29080632_29080635delACAC||||||	GT:AD:AF:DP:F1R2:F2R1:SB	0/0:32,0:0.027:32:10,0:15,0:15,17,0,0	0/1:10,5:0.354:15:6,2:3,3:9,1,3,2	2985_T1
chr1	29119207	.	G	A	.	PASS	AS_FilterStatus=SITE;AS_SB_TABLE=24,29|4,2;DP=62;ECNT=1;GERMQ=93;MBQ=33,34;MFRL=439,453;MMQ=60,60;MPOS=25;NALOD=1.43;NLOD=7.78;POPAF=6.00;TLOD=16.11;ANN=A|intergenic_region|MODIFIER|Gm6462-Gm25586|ENSMUSG00000058590-ENSMUSG00000064433|intergenic_region|ENSMUSG00000058590-ENSMUSG00000064433|||n.29119207G>A||||||	GT:AD:AF:DP:F1R2:F2R1:SB	0/0:26,0:0.036:26:13,0:10,0:9,17,0,0	0/1:27,6:0.201:33:15,2:8,4:15,12,4,2	613_T1
chr1	29170494	.	G	A	.	PASS	AS_FilterStatus=SITE;AS_SB_TABLE=39,29|1,4;DP=75;ECNT=1;GERMQ=93;MBQ=35,34;MFRL=446,486;MMQ=60,60;MPOS=22;NALOD=1.57;NLOD=10.49;POPAF=6.00;TLOD=9.68;ANN=A|intergenic_region|MODIFIER|Gm6462-Gm25586|ENSMUSG00000058590-ENSMUSG00000064433|intergenic_region|ENSMUSG00000058590-ENSMUSG00000064433|||n.29170494G>A||||||	GT:AD:AF:DP:F1R2:F2R1:SB	0/0:36,0:0.026:36:15,0:20,0:22,14,0,0	0/1:32,5:0.144:37:13,3:17,1:17,15,1,4	613_T1
chr1	29172499	.	CTT	C	.	PASS	AS_FilterStatus=SITE;AS_SB_TABLE=10,13|3,1;DP=37;ECNT=1;GERMQ=42;MBQ=33,34;MFRL=413,572;MMQ=60,60;MPOS=64;NALOD=0.690;NLOD=4.19;POPAF=6.00;RPA=20,18;RU=T;STR;STRQ=93;TLOD=6.19;ANN=C|intergenic_region|MODIFIER|Gm6462-Gm25586|ENSMUSG00000058590-ENSMUSG00000064433|intergenic_region|ENSMUSG00000058590-ENSMUSG00000064433|||n.29172500_29172501delTT||||||	GT:AD:AF:DP:F1R2:F2R1:SB	0/0:14,0:0.057:14:7,0:3,0:6,8,0,0	0/1:9,4:0.329:13:2,3:5,1:4,5,3,1	3147_T1
chr1	29198624	.	AACAC	A	.	PASS	AS_FilterStatus=SITE;AS_SB_TABLE=24,19|2,1;DP=69;ECNT=1;GERMQ=93;MBQ=34,34;MFRL=421,467;MMQ=60,60;MPOS=54;NALOD=1.01;NLOD=6.53;POPAF=6.00;RPA=20,18;RU=AC;STR;STRQ=93;TLOD=6.92;ANN=A|intergenic_region|MODIFIER|Gm6462-Gm25586|ENSMUSG00000058590-ENSMUSG00000064433|intergenic_region|ENSMUSG00000058590-ENSMUSG00000064433|||n.29198625_29198628delACAC||||||	GT:AD:AF:DP:F1R2:F2R1:SB	0/0:22,0:0.035:22:8,0:12,0:11,11,0,0	0/1:21,3:0.151:24:9,1:11,2:13,8,2,1	613_T1
chr1	29216274	.	CT	C	.	PASS	AS_FilterStatus=SITE;AS_SB_TABLE=21,23|4,11;DP=64;ECNT=1;GERMQ=71;MBQ=34,36;MFRL=424,481;MMQ=60,60;MPOS=52;NALOD=1.16;NLOD=7.74;POPAF=6.00;RPA=15,14;RU=T;STR;STRQ=4;TLOD=29.06;ANN=C|intergenic_region|MODIFIER|Gm6462-Gm25586|ENSMUSG00000058590-ENSMUSG00000064433|intergenic_region|ENSMUSG00000058590-ENSMUSG00000064433|||n.29216275delT||||||	GT:AD:AF:DP:F1R2:F2R1:SB	0/0:26,0:0.035:26:12,0:14,0:14,12,0,0	0/1:18,15:0.474:33:5,7:13,8:7,11,4,11	613_T1
chr1	29228055	.	G	A	.	PASS	AS_FilterStatus=SITE;AS_SB_TABLE=7,20|2,3;DP=34;ECNT=1;GERMQ=52;MBQ=34,34;MFRL=449,515;MMQ=60,60;MPOS=9;NALOD=1.32;NLOD=5.97;POPAF=6.00;TLOD=12.53;ANN=A|intergenic_region|MODIFIER|Gm6462-Gm25586|ENSMUSG00000058590-ENSMUSG00000064433|intergenic_region|ENSMUSG00000058590-ENSMUSG00000064433|||n.29228055G>A||||||	GT:AD:AF:DP:F1R2:F2R1:SB	0/0:20,0:0.046:20:5,0:14,0:5,15,0,0	0/1:7,5:0.418:12:3,3:4,1:2,5,2,3	3147_T1
chr1	29255907	.	C	T	.	PASS	AS_FilterStatus=SITE;AS_SB_TABLE=39,25|5,1;DP=72;ECNT=1;GERMQ=93;MBQ=34,34;MFRL=457,491;MMQ=60,60;MPOS=33;NALOD=1.51;NLOD=9.33;POPAF=6.00;TLOD=14.85;ANN=T|intergenic_region|MODIFIER|Gm6462-Gm25586|ENSMUSG00000058590-ENSMUSG00000064433|intergenic_region|ENSMUSG00000058590-ENSMUSG00000064433|||n.29255907C>T||||||	GT:AD:AF:DP:F1R2:F2R1:SB	0/0:31,0:0.030:31:15,0:16,0:21,10,0,0	0/1:33,6:0.176:39:19,2:12,4:18,15,5,1	613_T1
chr1	29266235	.	T	C	.	PASS	AS_FilterStatus=SITE;AS_SB_TABLE=25,25|4,4;DP=60;ECNT=1;GERMQ=91;MBQ=36,34;MFRL=464,522;MMQ=60,60;MPOS=24;NALOD=1.45;NLOD=7.83;POPAF=6.00;TLOD=22.68;ANN=C|intergenic_region|MODIFIER|Gm6462-Gm25586|ENSMUSG00000058590-ENSMUSG00000064433|intergenic_region|ENSMUSG00000058590-ENSMUSG00000064433|||n.29266235T>C||||||	GT:AD:AF:DP:F1R2:F2R1:SB	0/0:26,0:0.035:26:13,0:13,0:13,13,0,0	0/1:24,8:0.266:32:9,5:14,3:12,12,4,4	3147_T1
chr1	29266544	.	CAA	C	.	PASS	AS_FilterStatus=SITE;AS_SB_TABLE=19,22|3,6;DP=63;ECNT=1;GERMQ=69;MBQ=34,34;MFRL=465,435;MMQ=60,60;MPOS=27;NALOD=0.783;NLOD=6.58;POPAF=6.00;RPA=20,18;RU=A;STR;STRQ=93;TLOD=9.48;ANN=C|intergenic_region|MODIFIER|Gm6462-Gm25586|ENSMUSG00000058590-ENSMUSG00000064433|intergenic_region|ENSMUSG00000058590-ENSMUSG00000064433|||n.29266545_29266546delAA||||||	GT:AD:AF:DP:F1R2:F2R1:SB	0/0:22,0:0.037:22:9,0:6,0:11,11,0,0	0/1:19,9:0.339:28:7,4:5,5:8,11,3,6	613_T1
chr1	29285478	.	CGTGT	C	.	PASS	AS_FilterStatus=SITE;AS_SB_TABLE=19,19|1,5;DP=63;ECNT=1;GERMQ=73;MBQ=31,24;MFRL=408,264;MMQ=60,60;MPOS=46;NALOD=1.20;NLOD=7.11;POPAF=6.00;RPA=19,17;RU=GT;STR;STRQ=93;TLOD=12.93;ANN=C|upstream_gene_variant|MODIFIER|Gm25586|ENSMUSG00000064433|transcript|ENSMUST00000082499|misc_RNA||n.-4407_-4404delACAC|||||4404|,C|intergenic_region|MODIFIER|Gm25586-Gm22679|ENSMUSG00000064433-ENSMUSG00000080625|inte…	GT:AD:AF:DP:F1R2:F2R1:SB	0/0:24,0:0.034:24:12,0:10,0:13,11,0,0	0/1:14,6:0.285:20:6,2:3,3:6,8,1,5	2985_T1
chr1	29330717	.	CTT	C	.	PASS	AS_FilterStatus=SITE;AS_SB_TABLE=17,17|3,1;DP=47;ECNT=1;GERMQ=74;MBQ=34,35;MFRL=456,444;MMQ=60,60;MPOS=50;NALOD=1.12;NLOD=6.91;POPAF=6.00;RPA=13,11;RU=T;STR;STRQ=93;TLOD=10.62;ANN=C|intergenic_region|MODIFIER|Gm22679-Gm23785|ENSMUSG00000080625-ENSMUSG00000080391|intergenic_region|ENSMUSG00000080625-ENSMUSG00000080391|||n.29330718_29330719delTT||||||	GT:AD:AF:DP:F1R2:F2R1:SB	0/0:23,0:0.038:23:10,0:13,0:14,9,0,0	0/1:11,4:0.290:15:6,3:4,1:3,8,3,1	2985_T1
chr1	29366207	.	C	T	.	PASS	AS_FilterStatus=SITE;AS_SB_TABLE=29,32|3,1;DP=69;ECNT=1;GERMQ=93;MBQ=29,35;MFRL=442,395;MMQ=60,60;MPOS=16;NALOD=1.54;NLOD=9.63;POPAF=6.00;TLOD=6.88;ANN=T|upstream_gene_variant|MODIFIER|Gm23785|ENSMUSG00000080391|transcript|ENSMUST00000116741|miRNA||n.-4837G>A|||||4837|,T|intergenic_region|MODIFIER|Gm23785-mmu-mir-6342|ENSMUSG00000080391-ENSMUSG00000099257|intergenic_region|ENSMUSG00000080391-ENSM…	GT:AD:AF:DP:F1R2:F2R1:SB	0/0:32,0:0.028:32:16,0:16,0:13,19,0,0	0/1:29,4:0.130:33:14,1:14,2:16,13,3,1	613_T1
chr1	29367843	.	A	T	.	PASS	AS_FilterStatus=SITE;AS_SB_TABLE=28,27|4,4;DP=65;ECNT=1;GERMQ=93;MBQ=34,34;MFRL=408,418;MMQ=60,60;MPOS=49;NALOD=1.51;NLOD=9.33;POPAF=6.00;TLOD=18.92;ANN=T|intergenic_region|MODIFIER|Gm23785-mmu-mir-6342|ENSMUSG00000080391-ENSMUSG00000099257|intergenic_region|ENSMUSG00000080391-ENSMUSG00000099257|||n.29367843A>T||||||	GT:AD:AF:DP:F1R2:F2R1:SB	0/0:31,0:0.030:31:15,0:16,0:17,14,0,0	0/1:24,8:0.257:32:11,3:13,4:11,13,4,4	2985_T1
chr1	29403784	.	TG	T	.	PASS	AS_FilterStatus=SITE;AS_SB_TABLE=28,22|2,3;DP=61;ECNT=1;GERMQ=93;MBQ=35,35;MFRL=443,428;MMQ=60,60;MPOS=33;NALOD=1.47;NLOD=8.11;POPAF=6.00;RPA=7,6;RU=G;STR;STRQ=93;TLOD=9.12;ANN=T|intergenic_region|MODIFIER|Gm23785-mmu-mir-6342|ENSMUSG00000080391-ENSMUSG00000099257|intergenic_region|ENSMUSG00000080391-ENSMUSG00000099257|||n.29403785delG||||||	GT:AD:AF:DP:F1R2:F2R1:SB	0/0:27,0:0.033:27:16,0:11,0:17,10,0,0	0/1:23,5:0.199:28:12,2:10,3:11,12,2,3	613_T1
chr1	29457355	.	G	T	.	PASS	AS_FilterStatus=SITE;AS_SB_TABLE=29,16|3,1;DP=55;ECNT=2;GERMQ=93;MBQ=35,34;MFRL=400,469;MMQ=60,60;MPOS=10;NALOD=1.47;NLOD=7.73;POPAF=6.00;TLOD=10.17;ANN=T|intergenic_region|MODIFIER|mmu-mir-6342-Gm23771|ENSMUSG00000099257-ENSMUSG00000096829|intergenic_region|ENSMUSG00000099257-ENSMUSG00000096829|||n.29457355G>T||||||	GT:AD:AF:DP:F1R2:F2R1:SB	0/0:26,0:0.033:26:11,0:11,0:15,11,0,0	0/1:19,4:0.200:23:8,2:10,2:14,5,3,1	2985_T1
chr1	29479322	.	G	T	.	PASS	AS_FilterStatus=SITE;AS_SB_TABLE=27,12|2,2;DP=44;ECNT=1;GERMQ=75;MBQ=36,35;MFRL=421,361;MMQ=60,60;MPOS=26;NALOD=1.31;NLOD=5.72;POPAF=6.00;TLOD=10.58;ANN=T|intergenic_region|MODIFIER|mmu-mir-6342-Gm23771|ENSMUSG00000099257-ENSMUSG00000096829|intergenic_region|ENSMUSG00000099257-ENSMUSG00000096829|||n.29479322G>T||||||	GT:AD:AF:DP:F1R2:F2R1:SB	0/0:20,0:0.047:20:10,0:10,0:16,4,0,0	0/1:19,4:0.200:23:6,4:13,0:11,8,2,2	3147_T1
chr1	29481068	.	G	T	.	PASS	AS_FilterStatus=SITE;AS_SB_TABLE=34,26|7,7;DP=75;ECNT=2;GERMQ=93;MBQ=36,35;MFRL=427,465;MMQ=60,60;MPOS=46;NALOD=1.64;NLOD=12.29;POPAF=6.00;TLOD=42.00;ANN=T|intergenic_region|MODIFIER|mmu-mir-6342-Gm23771|ENSMUSG00000099257-ENSMUSG00000096829|intergenic_region|ENSMUSG00000099257-ENSMUSG00000096829|||n.29481068G>T||||||	GT:AD:AF:DP:F1R2:F2R1:SB	0/0:41,0:0.023:41:20,0:20,0:25,16,0,0	0/1:19,14:0.412:33:9,7:10,7:9,10,7,7	2985_T1
chr1	29511545	.	GT	G	.	PASS	AS_FilterStatus=SITE;AS_SB_TABLE=41,42|1,4;DP=90;ECNT=1;GERMQ=93;MBQ=33,32;MFRL=437,367;MMQ=60,60;MPOS=31;NALOD=1.69;NLOD=14.13;POPAF=6.00;RPA=7,6;RU=T;STR;STRQ=93;TLOD=8.21;ANN=G|intergenic_region|MODIFIER|mmu-mir-6342-Gm23771|ENSMUSG00000099257-ENSMUSG00000096829|intergenic_region|ENSMUSG00000099257-ENSMUSG00000096829|||n.29511546delT||||||	GT:AD:AF:DP:F1R2:F2R1:SB	0/0:48,0:0.020:48:20,0:24,0:21,27,0,0	0/1:35,5:0.146:40:16,1:18,2:20,15,1,4	613_T1
chr1	29552827	.	GAA	G	.	PASS	AS_FilterStatus=SITE;AS_SB_TABLE=7,33|0,3;DP=49;ECNT=1;GERMQ=93;MBQ=33,32;MFRL=410,532;MMQ=60,60;MPOS=52;NALOD=1.19;NLOD=8.13;POPAF=6.00;RPA=13,11;RU=A;STR;STRQ=93;TLOD=5.98;ANN=G|intergenic_region|MODIFIER|mmu-mir-6342-Gm23771|ENSMUSG00000099257-ENSMUSG00000096829|intergenic_region|ENSMUSG00000099257-ENSMUSG00000096829|||n.29552828_29552829delAA||||||	GT:AD:AF:DP:F1R2:F2R1:SB	0/0:27,0:0.033:27:11,0:10,0:4,23,0,0	0/1:13,3:0.231:16:5,2:6,0:3,10,0,3	613_T1
chr1	29578843	.	G	T	.	PASS	AS_FilterStatus=SITE;AS_SB_TABLE=30,30|4,1;DP=67;ECNT=1;GERMQ=93;MBQ=34,35;MFRL=448,397;MMQ=60,60;MPOS=29;NALOD=1.55;NLOD=10.19;POPAF=6.00;TLOD=12.84;ANN=T|intergenic_region|MODIFIER|mmu-mir-6342-Gm23771|ENSMUSG00000099257-ENSMUSG00000096829|intergenic_region|ENSMUSG00000099257-ENSMUSG00000096829|||n.29578843G>T||||||	GT:AD:AF:DP:F1R2:F2R1:SB	0/0:34,0:0.028:34:20,0:13,0:17,17,0,0	0/1:26,5:0.181:31:11,3:15,2:13,13,4,1	2985_T1
chr1	29693957	.	CTT	C	.	PASS	AS_FilterStatus=SITE;AS_SB_TABLE=22,22|1,2;DP=59;ECNT=1;GERMQ=93;MBQ=34,32;MFRL=439,410;MMQ=60,60;MPOS=8;NALOD=1.00;NLOD=6.92;POPAF=6.00;RPA=15,13;RU=T;STR;STRQ=93;TLOD=5.37;ANN=C|intergenic_region|MODIFIER|mmu-mir-6342-Gm23771|ENSMUSG00000099257-ENSMUSG00000096829|intergenic_region|ENSMUSG00000099257-ENSMUSG00000096829|||n.29693958_29693959delTT||||||	GT:AD:AF:DP:F1R2:F2R1:SB	0/0:23,0:0.036:23:8,0:13,0:11,12,0,0	0/1:21,3:0.154:24:7,0:11,3:11,10,1,2	2985_T1
chr1	29714697	.	C	T	.	PASS	AS_FilterStatus=SITE;AS_SB_TABLE=30,39|5,2;DP=77;ECNT=1;GERMQ=93;MBQ=34,36;MFRL=437,571;MMQ=60,60;MPOS=44;NALOD=1.54;NLOD=9.93;POPAF=6.00;TLOD=16.42;ANN=T|intergenic_region|MODIFIER|mmu-mir-6342-Gm23771|ENSMUSG00000099257-ENSMUSG00000096829|intergenic_region|ENSMUSG00000099257-ENSMUSG00000096829|||n.29714697C>T||||||	GT:AD:AF:DP:F1R2:F2R1:SB	0/0:34,0:0.028:34:19,0:14,0:12,22,0,0	0/1:35,7:0.178:42:14,3:21,3:18,17,5,2	2985_T1
chr1	29766670	.	C	A	.	PASS	AS_FilterStatus=SITE;AS_SB_TABLE=37,19|3,2;DP=64;ECNT=1;GERMQ=93;MBQ=34,33;MFRL=451,417;MMQ=60,60;MPOS=48;NALOD=1.51;NLOD=9.28;POPAF=6.00;TLOD=12.53;ANN=A|intergenic_region|MODIFIER|mmu-mir-6342-Gm23771|ENSMUSG00000099257-ENSMUSG00000096829|intergenic_region|ENSMUSG00000099257-ENSMUSG00000096829|||n.29766670C>A||||||	GT:AD:AF:DP:F1R2:F2R1:SB	0/0:31,0:0.030:31:16,0:13,0:20,11,0,0	0/1:25,5:0.187:30:10,3:15,2:17,8,3,2	2985_T1
chr1	29792256	.	T	C	.	PASS	AS_FilterStatus=SITE;AS_SB_TABLE=34,28|2,1;DP=68;ECNT=1;GERMQ=93;MBQ=35,32;MFRL=439,420;MMQ=60,60;MPOS=21;NALOD=1.57;NLOD=10.83;POPAF=6.00;TLOD=5.66;ANN=C|intergenic_region|MODIFIER|mmu-mir-6342-Gm23771|ENSMUSG00000099257-ENSMUSG00000096829|intergenic_region|ENSMUSG00000099257-ENSMUSG00000096829|||n.29792256T>C||||||	GT:AD:AF:DP:F1R2:F2R1:SB	0/0:36,0:0.026:36:20,0:16,0:21,15,0,0	0/1:26,3:0.133:29:12,1:13,2:13,13,2,1	613_T1
chr1	29801434	.	G	T	.	PASS	AS_FilterStatus=SITE;AS_SB_TABLE=38,24|6,2;DP=73;ECNT=1;GERMQ=93;MBQ=35,34;MFRL=442,365;MMQ=60,60;MPOS=16;NALOD=1.27;NLOD=10.49;POPAF=6.00;TLOD=19.51;ANN=T|intergenic_region|MODIFIER|mmu-mir-6342-Gm23771|ENSMUSG00000099257-ENSMUSG00000096829|intergenic_region|ENSMUSG00000099257-ENSMUSG00000096829|||n.29801434G>T||||||	GT:AD:AF:DP:F1R2:F2R1:SB	0/0:36,0:0.027:36:18,0:17,0:22,14,0,0	0/1:26,8:0.242:34:10,3:15,4:16,10,6,2	2985_T1
chr1	29823634	.	G	A	.	PASS	AS_FilterStatus=SITE;AS_SB_TABLE=26,30|6,3;DP=69;ECNT=1;GERMQ=93;MBQ=35,36;MFRL=457,446;MMQ=60,60;MPOS=47;NALOD=1.40;NLOD=6.92;POPAF=6.00;TLOD=26.32;ANN=A|intergenic_region|MODIFIER|mmu-mir-6342-Gm23771|ENSMUSG00000099257-ENSMUSG00000096829|intergenic_region|ENSMUSG00000099257-ENSMUSG00000096829|||n.29823634G>A||||||	GT:AD:AF:DP:F1R2:F2R1:SB	0/0:23,0:0.039:23:11,0:12,0:10,13,0,0	0/1:33,9:0.227:42:17,5:16,4:16,17,6,3	613_T1
chr1	29826782	.	GTT	G	.	PASS	AS_FilterStatus=SITE;AS_SB_TABLE=30,26|1,2;DP=75;ECNT=1;GERMQ=93;MBQ=35,32;MFRL=448,495;MMQ=60,60;MPOS=45;NALOD=1.30;NLOD=9.88;POPAF=6.00;RPA=11,9;RU=T;STR;STRQ=93;TLOD=5.88;ANN=G|intergenic_region|MODIFIER|mmu-mir-6342-Gm23771|ENSMUSG00000099257-ENSMUSG00000096829|intergenic_region|ENSMUSG00000099257-ENSMUSG00000096829|||n.29826783_29826784delTT||||||	GT:AD:AF:DP:F1R2:F2R1:SB	0/0:33,0:0.026:33:13,0:16,0:20,13,0,0	0/1:23,3:0.144:26:7,0:11,2:10,13,1,2	613_T1
chr1	29830581	.	G	A	.	PASS	AS_FilterStatus=SITE;AS_SB_TABLE=29,34|4,6;DP=74;ECNT=1;GERMQ=93;MBQ=35,34;MFRL=454,451;MMQ=60,60;MPOS=19;NALOD=1.61;NLOD=11.64;POPAF=6.00;TLOD=28.88;ANN=A|intergenic_region|MODIFIER|mmu-mir-6342-Gm23771|ENSMUSG00000099257-ENSMUSG00000096829|intergenic_region|ENSMUSG00000099257-ENSMUSG00000096829|||n.29830581G>A||||||	GT:AD:AF:DP:F1R2:F2R1:SB	0/0:39,0:0.024:39:21,0:14,0:17,22,0,0	0/1:24,10:0.307:34:11,5:12,5:12,12,4,6	613_T1
chr1	29875504	.	TA	T	.	PASS	AS_FilterStatus=SITE;AS_SB_TABLE=40,33|1,4;DP=83;ECNT=1;GERMQ=93;MBQ=35,33;MFRL=402,476;MMQ=60,60;MPOS=40;NALOD=1.64;NLOD=12.00;POPAF=6.00;RPA=7,6;RU=A;STR;STRQ=93;TLOD=8.39;ANN=T|intergenic_region|MODIFIER|mmu-mir-6342-Gm23771|ENSMUSG00000099257-ENSMUSG00000096829|intergenic_region|ENSMUSG00000099257-ENSMUSG00000096829|||n.29875505delA||||||	GT:AD:AF:DP:F1R2:F2R1:SB	0/0:40,0:0.023:40:24,0:15,0:19,21,0,0	0/1:33,5:0.157:38:16,1:17,3:21,12,1,4	2985_T1
chr1	29917964	.	CAA	C	.	PASS	AS_FilterStatus=SITE;AS_SB_TABLE=12,19|2,1;DP=52;ECNT=1;GERMQ=67;MBQ=33,33;MFRL=470,449;MMQ=60,60;MPOS=28;NALOD=0.755;NLOD=4.49;POPAF=6.00;RPA=20,18;RU=A;STR;STRQ=93;TLOD=5.09;ANN=C|intergenic_region|MODIFIER|mmu-mir-6342-Gm23771|ENSMUSG00000099257-ENSMUSG00000096829|intergenic_region|ENSMUSG00000099257-ENSMUSG00000096829|||n.29917965_29917966delAA||||||	GT:AD:AF:DP:F1R2:F2R1:SB	0/0:15,0:0.050:15:7,0:4,0:6,9,0,0	0/1:16,3:0.186:19:8,2:4,1:6,10,2,1	613_T1
chr1	29918818	.	GT	G	.	PASS	AS_FilterStatus=SITE;AS_SB_TABLE=40,24|2,4;DP=71;ECNT=1;GERMQ=93;MBQ=35,32;MFRL=451,443;MMQ=60,60;MPOS=37;NALOD=1.58;NLOD=10.20;POPAF=6.00;RPA=7,6;RU=T;STR;STRQ=93;TLOD=11.01;ANN=G|intergenic_region|MODIFIER|mmu-mir-6342-Gm23771|ENSMUSG00000099257-ENSMUSG00000096829|intergenic_region|ENSMUSG00000099257-ENSMUSG00000096829|||n.29918819delT||||||	GT:AD:AF:DP:F1R2:F2R1:SB	0/0:35,0:0.026:35:19,0:14,0:23,12,0,0	0/1:29,6:0.189:35:9,2:17,2:17,12,2,4	613_T1
chr1	29919016	.	A	G	.	PASS	AS_FilterStatus=SITE;AS_SB_TABLE=37,43|3,2;DP=90;ECNT=1;GERMQ=93;MBQ=34,36;MFRL=473,496;MMQ=60,60;MPOS=30;NALOD=1.60;NLOD=11.39;POPAF=6.00;TLOD=10.91;ANN=G|intergenic_region|MODIFIER|mmu-mir-6342-Gm23771|ENSMUSG00000099257-ENSMUSG00000096829|intergenic_region|ENSMUSG00000099257-ENSMUSG00000096829|||n.29919016A>G||||||	GT:AD:AF:DP:F1R2:F2R1:SB	0/0:38,0:0.025:38:13,0:24,0:20,18,0,0	0/1:42,5:0.122:47:23,4:19,1:17,25,3,2	613_T1
chr1	29958878	.	TTCTCTC	T	.	PASS	AS_FilterStatus=SITE;AS_SB_TABLE=14,13|4,1;DP=45;ECNT=1;GERMQ=38;MBQ=35,35;MFRL=446,450;MMQ=60,60;MPOS=58;NALOD=0.829;NLOD=4.12;POPAF=6.00;RPA=21,18;RU=TC;STR;STRQ=93;TLOD=15.13;ANN=T|intergenic_region|MODIFIER|mmu-mir-6342-Gm23771|ENSMUSG00000099257-ENSMUSG00000096829|intergenic_region|ENSMUSG00000099257-ENSMUSG00000096829|||n.29958879_29958884delTCTCTC||||||	GT:AD:AF:DP:F1R2:F2R1:SB	0/0:14,0:0.054:14:7,0:6,0:6,8,0,0	0/1:13,5:0.299:18:5,1:7,4:8,5,4,1	613_T1
chr1	29960951	.	A	G	.	PASS	AS_FilterStatus=SITE;AS_SB_TABLE=50,24|1,2;DP=82;ECNT=1;GERMQ=93;MBQ=34,33;MFRL=453,407;MMQ=60,60;MPOS=31;NALOD=1.57;NLOD=10.53;POPAF=6.00;TLOD=5.68;ANN=G|intergenic_region|MODIFIER|mmu-mir-6342-Gm23771|ENSMUSG00000099257-ENSMUSG00000096829|intergenic_region|ENSMUSG00000099257-ENSMUSG00000096829|||n.29960951A>G||||||	GT:AD:AF:DP:F1R2:F2R1:SB	0/0:35,0:0.026:35:17,0:18,0:24,11,0,0	0/1:39,3:0.092:42:15,2:24,1:26,13,1,2	613_T1
chr1	29997487	.	CA	C	.	PASS	AS_FilterStatus=SITE;AS_SB_TABLE=15,12|7,8;DP=53;ECNT=1;GERMQ=51;MBQ=34,33;MFRL=431,402;MMQ=60,60;MPOS=36;NALOD=1.35;NLOD=5.34;POPAF=6.00;RPA=15,14;RU=A;STR;STRQ=30;TLOD=29.32;ANN=C|intergenic_region|MODIFIER|Gm23771-AC132241.1|ENSMUSG00000096829-ENSMUSG00000098883|intergenic_region|ENSMUSG00000096829-ENSMUSG00000098883|||n.29997488delA||||||	GT:AD:AF:DP:F1R2:F2R1:SB	0/0:18,0:0.044:18:4,0:13,0:10,8,0,0	0/1:9,15:0.615:24:5,7:3,5:5,4,7,8	2985_T1
chr1	30006138	.	A	G	.	PASS	AS_FilterStatus=SITE;AS_SB_TABLE=27,42|3,2;DP=74;ECNT=1;GERMQ=93;MBQ=34,36;MFRL=445,463;MMQ=60,60;MPOS=50;NALOD=1.53;NLOD=9.84;POPAF=6.00;TLOD=12.69;ANN=G|intergenic_region|MODIFIER|Gm23771-AC132241.1|ENSMUSG00000096829-ENSMUSG00000098883|intergenic_region|ENSMUSG00000096829-ENSMUSG00000098883|||n.30006138A>G||||||	GT:AD:AF:DP:F1R2:F2R1:SB	0/0:33,0:0.029:33:13,0:18,0:15,18,0,0	0/1:36,5:0.139:41:12,3:24,2:12,24,3,2	613_T1
chr1	30090815	.	CGGGGG	C	.	PASS	AS_FilterStatus=SITE;AS_SB_TABLE=13,4|4,2;DP=30;ECNT=1;GERMQ=11;MBQ=33,27;MFRL=467,452;MMQ=60,60;MPOS=30;NALOD=0.896;NLOD=3.24;POPAF=6.00;RPA=19,14;RU=G;STR;STRQ=93;TLOD=18.57;ANN=C|intergenic_region|MODIFIER|Gm23771-AC132241.1|ENSMUSG00000096829-ENSMUSG00000098883|intergenic_region|ENSMUSG00000096829-ENSMUSG00000098883|||n.30090816_30090820delGGGGG||||||	GT:AD:AF:DP:F1R2:F2R1:SB	0/0:11,0:0.066:11:4,0:3,0:10,1,0,0	0/1:6,6:0.507:12:2,2:1,2:3,3,4,2	613_T1
chr1	30154290	.	T	C	.	PASS	AS_FilterStatus=SITE;AS_SB_TABLE=28,17|3,2;DP=51;ECNT=1;GERMQ=93;MBQ=34,33;MFRL=461,377;MMQ=60,60;MPOS=41;NALOD=1.48;NLOD=8.73;POPAF=6.00;TLOD=13.63;ANN=C|intergenic_region|MODIFIER|Gm23771-AC132241.1|ENSMUSG00000096829-ENSMUSG00000098883|intergenic_region|ENSMUSG00000096829-ENSMUSG00000098883|||n.30154290T>C||||||	GT:AD:AF:DP:F1R2:F2R1:SB	0/0:29,0:0.032:29:14,0:15,0:19,10,0,0	0/1:16,5:0.261:21:7,3:9,2:9,7,3,2	3147_T1
chr1	30179727	.	C	T	.	PASS	AS_FilterStatus=SITE;AS_SB_TABLE=44,45|2,2;DP=94;ECNT=1;GERMQ=93;MBQ=34,35;MFRL=442,406;MMQ=60,60;MPOS=54;NALOD=1.59;NLOD=11.39;POPAF=6.00;TLOD=8.77;ANN=T|intergenic_region|MODIFIER|Gm23771-AC132241.1|ENSMUSG00000096829-ENSMUSG00000098883|intergenic_region|ENSMUSG00000096829-ENSMUSG00000098883|||n.30179727C>T||||||	GT:AD:AF:DP:F1R2:F2R1:SB	0/0:38,0:0.025:38:21,0:15,0:18,20,0,0	0/1:51,4:0.089:55:28,3:23,1:26,25,2,2	613_T1
chr1	30179956	.	G	A	.	PASS	AS_FilterStatus=SITE;AS_SB_TABLE=28,33|4,5;DP=72;ECNT=1;GERMQ=93;MBQ=29,34;MFRL=420,470;MMQ=60,60;MPOS=46;NALOD=1.50;NLOD=8.98;POPAF=6.00;TLOD=22.19;ANN=A|intergenic_region|MODIFIER|Gm23771-AC132241.1|ENSMUSG00000096829-ENSMUSG00000098883|intergenic_region|ENSMUSG00000096829-ENSMUSG00000098883|||n.30179956G>A||||||	GT:AD:AF:DP:F1R2:F2R1:SB	0/0:31,0:0.031:31:15,0:15,0:11,20,0,0	0/1:30,9:0.238:39:14,3:15,5:17,13,4,5	2985_T1
chr1	30210041	.	C	T	.	PASS	AS_FilterStatus=SITE;AS_SB_TABLE=27,26|3,1;DP=58;ECNT=1;GERMQ=93;MBQ=34,34;MFRL=400,417;MMQ=60,60;MPOS=46;NALOD=1.56;NLOD=10.53;POPAF=6.00;TLOD=10.62;ANN=T|intergenic_region|MODIFIER|Gm23771-AC132241.1|ENSMUSG00000096829-ENSMUSG00000098883|intergenic_region|ENSMUSG00000096829-ENSMUSG00000098883|||n.30210041C>T||||||	GT:AD:AF:DP:F1R2:F2R1:SB	0/0:38,0:0.027:38:23,0:15,0:21,17,0,0	0/1:15,4:0.238:19:9,1:6,3:6,9,3,1	2985_T1
chr1	30273264	.	A	G	.	PASS	AS_FilterStatus=SITE;AS_SB_TABLE=24,29|1,4;DP=60;ECNT=1;GERMQ=93;MBQ=36,33;MFRL=475,397;MMQ=60,60;MPOS=52;NALOD=1.35;NLOD=6.32;POPAF=6.00;TLOD=9.36;ANN=G|intergenic_region|MODIFIER|Gm23771-AC132241.1|ENSMUSG00000096829-ENSMUSG00000098883|intergenic_region|ENSMUSG00000096829-ENSMUSG00000098883|||n.30273264A>G||||||	GT:AD:AF:DP:F1R2:F2R1:SB	0/0:21,0:0.043:21:9,0:12,0:8,13,0,0	0/1:32,5:0.143:37:16,1:16,3:16,16,1,4	613_T1
chr1	30289482	.	A	G	.	PASS	AS_FilterStatus=SITE;AS_SB_TABLE=22,21|2,4;DP=51;ECNT=1;GERMQ=81;MBQ=35,35;MFRL=438,451;MMQ=60,60;MPOS=40;NALOD=1.38;NLOD=6.92;POPAF=6.00;TLOD=16.65;ANN=G|intergenic_region|MODIFIER|Gm23771-AC132241.1|ENSMUSG00000096829-ENSMUSG00000098883|intergenic_region|ENSMUSG00000096829-ENSMUSG00000098883|||n.30289482A>G||||||	GT:AD:AF:DP:F1R2:F2R1:SB	0/0:23,0:0.040:23:13,0:10,0:9,14,0,0	0/1:20,6:0.249:26:11,1:9,5:13,7,2,4	3147_T1
chr1	30290077	.	A	G	.	PASS	AS_FilterStatus=SITE;AS_SB_TABLE=25,21|1,2;DP=51;ECNT=1;GERMQ=93;MBQ=34,32;MFRL=443,465;MMQ=60,60;MPOS=23;NALOD=1.32;NLOD=5.72;POPAF=6.00;TLOD=5.73;ANN=G|intergenic_region|MODIFIER|Gm23771-AC132241.1|ENSMUSG00000096829-ENSMUSG00000098883|intergenic_region|ENSMUSG00000096829-ENSMUSG00000098883|||n.30290077A>G||||||	GT:AD:AF:DP:F1R2:F2R1:SB	0/0:19,0:0.046:19:12,0:7,0:9,10,0,0	0/1:27,3:0.124:30:18,3:9,0:16,11,1,2	3147_T1
chr1	30300838	.	G	T	.	PASS	AS_FilterStatus=SITE;AS_SB_TABLE=19,25|2,1;DP=48;ECNT=1;GERMQ=93;MBQ=35,35;MFRL=457,451;MMQ=60,60;MPOS=37;NALOD=1.43;NLOD=7.78;POPAF=6.00;TLOD=7.65;ANN=T|intergenic_region|MODIFIER|Gm23771-AC132241.1|ENSMUSG00000096829-ENSMUSG00000098883|intergenic_region|ENSMUSG00000096829-ENSMUSG00000098883|||n.30300838G>T||||||	GT:AD:AF:DP:F1R2:F2R1:SB	0/0:27,0:0.036:27:9,0:16,0:13,14,0,0	0/1:17,3:0.182:20:4,2:12,1:6,11,2,1	3147_T1
chr1	30311278	.	G	A	.	PASS	AS_FilterStatus=SITE;AS_SB_TABLE=37,6|2,3;DP=49;ECNT=1;GERMQ=83;MBQ=35,20;MFRL=419,158;MMQ=33,60;MPOS=8;NALOD=1.34;NLOD=6.22;POPAF=6.00;TLOD=8.35;ANN=A|intergenic_region|MODIFIER|Gm23771-AC132241.1|ENSMUSG00000096829-ENSMUSG00000098883|intergenic_region|ENSMUSG00000096829-ENSMUSG00000098883|||n.30311278G>A||||||	GT:AD:AF:DP:F1R2:F2R1:SB	0/0:21,0:0.044:21:7,0:11,0:18,3,0,0	0/1:22,5:0.153:27:10,3:12,2:19,3,2,3	3147_T1
chr1	30316810	.	TA	T	.	PASS	AS_FilterStatus=SITE;AS_SB_TABLE=20,29|11,6;DP=73;ECNT=1;GERMQ=86;MBQ=34,34;MFRL=426,431;MMQ=60,60;MPOS=45;NALOD=1.24;NLOD=9.30;POPAF=6.00;RPA=11,10;RU=A;STR;STRQ=16;TLOD=28.28;ANN=T|intergenic_region|MODIFIER|Gm23771-AC132241.1|ENSMUSG00000096829-ENSMUSG00000098883|intergenic_region|ENSMUSG00000096829-ENSMUSG00000098883|||n.30316811delA||||||	GT:AD:AF:DP:F1R2:F2R1:SB	0/0:31,0:0.029:31:12,0:19,0:15,16,0,0	0/1:18,17:0.483:35:6,6:12,11:5,13,11,6	2985_T1
chr1	30331566	.	A	AT	.	PASS	AS_FilterStatus=SITE;AS_SB_TABLE=43,37|3,2;DP=90;ECNT=1;GERMQ=93;MBQ=34,35;MFRL=469,466;MMQ=60,60;MPOS=56;NALOD=1.71;NLOD=14.74;POPAF=6.00;RPA=7,8;RU=T;STR;STRQ=93;TLOD=8.10;ANN=AT|downstream_gene_variant|MODIFIER|AC132241.1|ENSMUSG00000098883|transcript|ENSMUST00000184585|miRNA||n.*1724_*1725insA|||||1724|,AT|intergenic_region|MODIFIER|Gm23771-AC132241.1|ENSMUSG00000096829-ENSMUSG00000098883|int…	GT:AD:AF:DP:F1R2:F2R1:SB	0/0:49,0:0.019:49:18,0:31,0:26,23,0,0	0/1:31,5:0.157:36:12,3:17,2:17,14,3,2	613_T1
chr1	30339749	.	TG	CA	.	PASS	AS_FilterStatus=SITE;AS_SB_TABLE=14,15|1,3;DP=41;ECNT=2;GERMQ=51;MBQ=34,32;MFRL=375,505;MMQ=60,60;MPOS=12;NALOD=0.945;NLOD=3.91;POPAF=6.00;TLOD=9.47;ANN=CA|intergenic_region|MODIFIER|AC132241.1-Gm9898|ENSMUSG00000098883-ENSMUSG00000053185|intergenic_region|ENSMUSG00000098883-ENSMUSG00000053185|||n.30339749_30339750delTGinsCA||||||	GT:AD:AF:DP:F1R2:F2R1:PGT:PID:PS:SB	0|0:14,0:0.058:14:6,0:7,0:0|1:30339749_TG_CA:30339749:8,6,0,0	0|1:15,4:0.247:19:12,0:2,2:0|1:30339749_TG_CA:30339749:6,9,1,3	2985_T1
chr1	30339765	.	T	G	.	PASS	AS_FilterStatus=SITE;AS_SB_TABLE=16,22|1,3;DP=42;ECNT=2;GERMQ=63;MBQ=25,34;MFRL=354,505;MMQ=60,60;MPOS=27;NALOD=1.22;NLOD=4.31;POPAF=6.00;TLOD=7.75;ANN=G|intergenic_region|MODIFIER|AC132241.1-Gm9898|ENSMUSG00000098883-ENSMUSG00000053185|intergenic_region|ENSMUSG00000098883-ENSMUSG00000053185|||n.30339765T>G||||||	GT:AD:AF:DP:F1R2:F2R1:PGT:PID:PS:SB	0|0:19,0:0.057:19:7,0:8,0:0|1:30339749_TG_CA:30339749:8,11,0,0	0|1:19,4:0.216:23:14,0:3,3:0|1:30339749_TG_CA:30339749:8,11,1,3	2985_T1
chr1	30387072	.	C	A	.	PASS	AS_FilterStatus=SITE;AS_SB_TABLE=28,32|3,5;DP=69;ECNT=1;GERMQ=93;MBQ=35,34;MFRL=435,378;MMQ=60,60;MPOS=18;NALOD=1.63;NLOD=12.29;POPAF=6.00;TLOD=23.59;ANN=A|intergenic_region|MODIFIER|AC132241.1-Gm9898|ENSMUSG00000098883-ENSMUSG00000053185|intergenic_region|ENSMUSG00000098883-ENSMUSG00000053185|||n.30387072C>A||||||	GT:AD:AF:DP:F1R2:F2R1:SB	0/0:42,0:0.023:42:17,0:24,0:22,20,0,0	0/1:18,8:0.321:26:13,2:5,6:6,12,3,5	2985_T1
chr1	30531003	.	TA	T	.	PASS	AS_FilterStatus=SITE;AS_SB_TABLE=38,27|2,2;DP=73;ECNT=1;GERMQ=93;MBQ=34,34;MFRL=431,429;MMQ=60,60;MPOS=33;NALOD=1.54;NLOD=9.92;POPAF=6.00;RPA=6,5;RU=A;STR;STRQ=93;TLOD=6.52;ANN=T|intergenic_region|MODIFIER|AC132241.1-Gm9898|ENSMUSG00000098883-ENSMUSG00000053185|intergenic_region|ENSMUSG00000098883-ENSMUSG00000053185|||n.30531004delA||||||	GT:AD:AF:DP:F1R2:F2R1:SB	0/0:34,0:0.028:34:14,0:18,0:19,15,0,0	0/1:31,4:0.138:35:13,4:15,0:19,12,2,2	3147_T1
chr1	30608317	.	GT	G	.	PASS	AS_FilterStatus=SITE;AS_SB_TABLE=22,23|1,4;DP=54;ECNT=1;GERMQ=93;MBQ=33,31;MFRL=426,405;MMQ=60,60;MPOS=12;NALOD=1.44;NLOD=7.20;POPAF=6.00;RPA=7,6;RU=T;STR;STRQ=93;TLOD=9.17;ANN=G|intergenic_region|MODIFIER|AC132241.1-Gm9898|ENSMUSG00000098883-ENSMUSG00000053185|intergenic_region|ENSMUSG00000098883-ENSMUSG00000053185|||n.30608318delT||||||	GT:AD:AF:DP:F1R2:F2R1:SB	0/0:24,0:0.035:24:10,0:8,0:11,13,0,0	0/1:21,5:0.212:26:10,4:11,1:11,10,1,4	613_T1
chr1	30711992	.	C	A	.	PASS	AS_FilterStatus=SITE;AS_SB_TABLE=22,32|3,4;DP=64;ECNT=1;GERMQ=93;MBQ=35,34;MFRL=409,382;MMQ=60,60;MPOS=48;NALOD=1.44;NLOD=7.52;POPAF=6.00;TLOD=16.75;ANN=A|intergenic_region|MODIFIER|AC132241.1-Gm9898|ENSMUSG00000098883-ENSMUSG00000053185|intergenic_region|ENSMUSG00000098883-ENSMUSG00000053185|||n.30711992C>A||||||	GT:AD:AF:DP:F1R2:F2R1:SB	0/0:26,0:0.036:26:19,0:7,0:11,15,0,0	0/1:28,7:0.194:35:13,5:15,2:11,17,3,4	2985_T1
chr1	30727906	.	G	T	.	PASS	AS_FilterStatus=SITE;AS_SB_TABLE=30,31|1,2;DP=67;ECNT=1;GERMQ=93;MBQ=33,35;MFRL=458,409;MMQ=60,48;MPOS=32;NALOD=1.54;NLOD=9.88;POPAF=6.00;TLOD=6.03;ANN=T|intergenic_region|MODIFIER|Gm9898-Phf3|ENSMUSG00000053185-ENSMUSG00000048874|intergenic_region|ENSMUSG00000053185-ENSMUSG00000048874|||n.30727906G>T||||||	GT:AD:AF:DP:F1R2:F2R1:SB	0/0:33,0:0.028:33:17,0:15,0:16,17,0,0	0/1:28,3:0.125:31:12,2:15,1:14,14,1,2	613_T1
chr1	30814886	.	CAA	C	.	PASS	AS_FilterStatus=SITE;AS_SB_TABLE=23,27|1,2;DP=63;ECNT=1;GERMQ=93;MBQ=34,35;MFRL=444,314;MMQ=60,60;MPOS=52;NALOD=1.23;NLOD=8.15;POPAF=6.00;RPA=12,10;RU=A;STR;STRQ=93;TLOD=5.79;ANN=C|intron_variant|MODIFIER|Phf3|ENSMUSG00000048874|transcript|ENSMUST00000088310|protein_coding|8/14|c.3037-797_3037-796delTT||||||	GT:AD:AF:DP:F1R2:F2R1:SB	0/0:27,0:0.032:27:12,0:14,0:13,14,0,0	0/1:23,3:0.145:26:13,1:7,2:10,13,1,2	2985_T1
chr1	30922373	.	ATT	A	.	PASS	AS_FilterStatus=SITE;AS_SB_TABLE=13,17|2,1;DP=42;ECNT=1;GERMQ=66;MBQ=34,34;MFRL=466,387;MMQ=60,60;MPOS=12;NALOD=1.36;NLOD=6.01;POPAF=6.00;RPA=15,13;RU=T;STR;STRQ=93;TLOD=7.19;ANN=A|intergenic_region|MODIFIER|Phf3-Ptp4a1|ENSMUSG00000048874-ENSMUSG00000026064|intergenic_region|ENSMUSG00000048874-ENSMUSG00000026064|||n.30922374_30922375delTT||||||	GT:AD:AF:DP:F1R2:F2R1:SB	0/0:20,0:0.043:20:15,0:5,0:9,11,0,0	0/1:10,3:0.264:13:5,1:4,2:4,6,2,1	3147_T1
chr1	30928710	.	CA	C	.	PASS	AS_FilterStatus=SITE;AS_SB_TABLE=17,18|5,7;DP=57;ECNT=1;GERMQ=66;MBQ=33,32;MFRL=436,408;MMQ=60,60;MPOS=40;NALOD=0.987;NLOD=7.12;POPAF=6.00;RPA=16,15;RU=A;STR;STRQ=3;TLOD=17.65;ANN=C|intergenic_region|MODIFIER|Phf3-Ptp4a1|ENSMUSG00000048874-ENSMUSG00000026064|intergenic_region|ENSMUSG00000048874-ENSMUSG00000026064|||n.30928711delA||||||	GT:AD:AF:DP:F1R2:F2R1:SB	0/0:24,0:0.036:24:10,0:9,0:11,13,0,0	0/1:11,12:0.496:23:4,2:3,8:6,5,5,7	2985_T1
chr1	30928710	.	CAA	C	.	PASS	AS_FilterStatus=SITE;AS_SB_TABLE=27,21|3,0;DP=75;ECNT=1;GERMQ=93;MBQ=34,34;MFRL=458,382;MMQ=60,60;MPOS=64;NALOD=1.03;NLOD=7.79;POPAF=6.00;RPA=16,14;RU=A;STR;STRQ=93;TLOD=5.01;ANN=C|intergenic_region|MODIFIER|Phf3-Ptp4a1|ENSMUSG00000048874-ENSMUSG00000026064|intergenic_region|ENSMUSG00000048874-ENSMUSG00000026064|||n.30928711_30928712delAA||||||	GT:AD:AF:DP:F1R2:F2R1:SB	0/0:26,0:0.032:26:14,0:7,0:15,11,0,0	0/1:22,3:0.149:25:6,1:7,2:12,10,3,0	613_T1
chr1	30954111	.	CA	C	.	PASS	AS_FilterStatus=SITE;AS_SB_TABLE=11,7|6,5;DP=44;ECNT=1;GERMQ=30;MBQ=33,34;MFRL=429,414;MMQ=60,60;MPOS=30;NALOD=0.767;NLOD=3.52;POPAF=6.00;RPA=19,18;RU=A;STR;STRQ=8;TLOD=13.44;ANN=C|upstream_gene_variant|MODIFIER|Ptp4a1|ENSMUSG00000026064|transcript|ENSMUST00000027232|protein_coding||c.-5061delT|||||4342|,C|intergenic_region|MODIFIER|Ptp4a1-Gm5698|ENSMUSG00000026064-ENSMUSG00000086151|intergenic_r…	GT:AD:AF:DP:F1R2:F2R1:SB	0/0:12,0:0.061:12:7,0:0,0:8,4,0,0	0/1:6,11:0.621:17:2,5:1,1:3,3,6,5	3147_T1
chr1	30995025	.	C	A	.	PASS	AS_FilterStatus=SITE;AS_SB_TABLE=26,33|1,3;DP=64;ECNT=1;GERMQ=93;MBQ=36,35;MFRL=432,452;MMQ=60,60;MPOS=68;NALOD=1.50;NLOD=9.28;POPAF=6.00;TLOD=8.33;ANN=A|downstream_gene_variant|MODIFIER|Gm5699|ENSMUSG00000087346|transcript|ENSMUST00000152491|protein_coding||c.*3158G>T|||||2842|,A|intergenic_region|MODIFIER|Gm9458-Gm5699|ENSMUSG00000086726-ENSMUSG00000087346|intergenic_region|ENSMUSG00000086726-E…	GT:AD:AF:DP:F1R2:F2R1:SB	0/0:31,0:0.030:31:16,0:14,0:14,17,0,0	0/1:28,4:0.146:32:17,3:11,1:12,16,1,3	2985_T1
chr1	31026984	.	C	T	.	PASS	AS_FilterStatus=SITE;AS_SB_TABLE=13,20|2,4;DP=43;ECNT=1;GERMQ=65;MBQ=34,34;MFRL=434,430;MMQ=60,60;MPOS=20;NALOD=1.15;NLOD=7.02;POPAF=6.00;TLOD=11.82;ANN=T|intergenic_region|MODIFIER|Gm5699-5S_rRNA|ENSMUSG00000087346-ENSMUSG00000098529|intergenic_region|ENSMUSG00000087346-ENSMUSG00000098529|||n.31026984C>T||||||	GT:AD:AF:DP:F1R2:F2R1:SB	0/0:24,0:0.036:24:9,0:9,0:7,17,0,0	0/1:9,6:0.429:15:2,4:4,2:6,3,2,4	2985_T1
chr1	31145922	.	T	C	.	PASS	AS_FilterStatus=SITE;AS_SB_TABLE=25,29|2,5;DP=63;ECNT=1;GERMQ=93;MBQ=34,28;MFRL=425,472;MMQ=60,60;MPOS=50;NALOD=1.57;NLOD=10.79;POPAF=6.00;TLOD=16.63;ANN=C|intragenic_variant|MODIFIER|4931428L18Rik|ENSMUSG00000086727|gene_variant|ENSMUSG00000086727|||n.31145922A>G||||||	GT:AD:AF:DP:F1R2:F2R1:SB	0/0:36,0:0.026:36:23,0:12,0:16,20,0,0	0/1:18,7:0.296:25:8,4:10,3:9,9,2,5	2985_T1
chr1	31169426	.	TA	T	.	PASS	AS_FilterStatus=SITE;AS_SB_TABLE=32,12|1,3;DP=51;ECNT=1;GERMQ=93;MBQ=34,33;MFRL=458,443;MMQ=60,60;MPOS=41;NALOD=1.43;NLOD=7.21;POPAF=6.00;RPA=7,6;RU=A;STR;STRQ=93;TLOD=6.59;ANN=T|intragenic_variant|MODIFIER|4931428L18Rik|ENSMUSG00000086727|gene_variant|ENSMUSG00000086727|||n.31169427delT||||||	GT:AD:AF:DP:F1R2:F2R1:SB	0/0:24,0:0.036:24:17,0:7,0:19,5,0,0	0/1:20,4:0.191:24:9,3:10,1:13,7,1,3	2985_T1
chr1	31203500	.	G	A	.	PASS	AS_FilterStatus=SITE;AS_SB_TABLE=33,31|5,1;DP=71;ECNT=1;GERMQ=93;MBQ=34,34;MFRL=452,536;MMQ=60,60;MPOS=38;NALOD=1.54;NLOD=9.93;POPAF=6.00;TLOD=15.70;ANN=A|missense_variant|MODERATE|Lgsn|ENSMUSG00000050217|transcript|ENSMUST00000062560|protein_coding|5/5|c.662G>A|p.Arg221Lys|707/1863|662/1692|221/563||,A|intron_variant|MODIFIER|4931428L18Rik|ENSMUSG00000086727|transcript|ENSMUST00000135245|protein…	GT:AD:AF:DP:F1R2:F2R1:SB	0/0:34,0:0.028:34:19,0:14,0:24,10,0,0	0/1:30,6:0.190:36:16,4:13,2:9,21,5,1	2985_T1
chr1	31206758	.	ATGTGTG	A	.	PASS	AS_FilterStatus=SITE;AS_SB_TABLE=24,9|3,0;DP=54;ECNT=1;GERMQ=62;MBQ=34,34;MFRL=426,358;MMQ=60,60;MPOS=23;NALOD=0.906;NLOD=4.69;POPAF=6.00;RPA=24,21;RU=TG;STR;STRQ=93;TLOD=5.79;ANN=A|downstream_gene_variant|MODIFIER|Lgsn|ENSMUSG00000050217|transcript|ENSMUST00000062560|protein_coding||c.*2229_*2234delTGTGTG|||||2103|,A|intron_variant|MODIFIER|4931428L18Rik|ENSMUSG00000086727|transcript|ENSMUST0000…	GT:AD:AF:DP:F1R2:F2R1:SB	0/0:16,0:0.046:16:9,0:4,0:13,3,0,0	0/1:17,3:0.178:20:6,2:10,1:11,6,3,0	613_T1
chr1	31233109	.	TA	T	.	PASS	AS_FilterStatus=SITE;AS_SB_TABLE=29,20|5,8;DP=64;ECNT=1;GERMQ=70;MBQ=36,34;MFRL=438,467;MMQ=60,60;MPOS=40;NALOD=1.37;NLOD=6.00;POPAF=6.00;RPA=6,5;RU=A;STR;STRQ=93;TLOD=29.37;ANN=T|intergenic_region|MODIFIER|Pih1d3-Gm26145|ENSMUSG00000026063-ENSMUSG00000077664|intergenic_region|ENSMUSG00000026063-ENSMUSG00000077664|||n.31233110delA||||||	GT:AD:AF:DP:F1R2:F2R1:SB	0/0:20,0:0.041:20:12,0:7,0:10,10,0,0	0/1:29,13:0.318:42:16,5:13,8:19,10,5,8	2985_T1
chr1	31249935	.	C	T	.	PASS	AS_FilterStatus=SITE;AS_SB_TABLE=34,31|4,4;DP=74;ECNT=1;GERMQ=93;MBQ=33,34;MFRL=427,410;MMQ=59,40;MPOS=34;NALOD=1.49;NLOD=8.98;POPAF=6.00;TLOD=18.85;ANN=T|intergenic_region|MODIFIER|Pih1d3-Gm26145|ENSMUSG00000026063-ENSMUSG00000077664|intergenic_region|ENSMUSG00000026063-ENSMUSG00000077664|||n.31249935C>T||||||	GT:AD:AF:DP:F1R2:F2R1:SB	0/0:30,0:0.031:30:17,0:12,0:16,14,0,0	0/1:35,8:0.197:43:13,7:21,0:18,17,4,4	3147_T1
chr1	31271596	.	TAA	T	.	PASS	AS_FilterStatus=SITE;AS_SB_TABLE=17,11|6,2;DP=45;ECNT=1;GERMQ=55;MBQ=34,35;MFRL=474,481;MMQ=60,60;MPOS=52;NALOD=1.10;NLOD=6.20;POPAF=6.00;RPA=19,17;RU=A;STR;STRQ=93;TLOD=17.95;ANN=T|intergenic_region|MODIFIER|Gm26145-Gm6489|ENSMUSG00000077664-ENSMUSG00000094215|intergenic_region|ENSMUSG00000077664-ENSMUSG00000094215|||n.31271597_31271598delAA||||||	GT:AD:AF:DP:F1R2:F2R1:SB	0/0:21,0:0.040:21:11,0:5,0:15,6,0,0	0/1:7,8:0.529:15:0,5:1,2:2,5,6,2	613_T1
chr1	31317041	.	C	A	.	PASS	AS_FilterStatus=SITE;AS_SB_TABLE=31,23|5,4;DP=65;ECNT=1;GERMQ=93;MBQ=33,34;MFRL=412,499;MMQ=60,60;MPOS=45;NALOD=1.50;NLOD=9.03;POPAF=6.00;TLOD=25.38;ANN=A|intergenic_region|MODIFIER|Gm6489-Gm10307|ENSMUSG00000094215-ENSMUSG00000070960|intergenic_region|ENSMUSG00000094215-ENSMUSG00000070960|||n.31317041C>A||||||	GT:AD:AF:DP:F1R2:F2R1:SB	0/0:31,0:0.031:31:16,0:15,0:17,14,0,0	0/1:23,9:0.303:32:9,6:14,3:14,9,5,4	2985_T1
chr1	31324625	.	TA	T	.	PASS	AS_FilterStatus=SITE;AS_SB_TABLE=23,28|5,1;DP=60;ECNT=1;GERMQ=93;MBQ=34,36;MFRL=450,432;MMQ=60,60;MPOS=43;NALOD=1.53;NLOD=9.28;POPAF=6.00;RPA=5,4;RU=A;STR;STRQ=93;TLOD=12.91;ANN=T|intergenic_region|MODIFIER|Gm6489-Gm10307|ENSMUSG00000094215-ENSMUSG00000070960|intergenic_region|ENSMUSG00000094215-ENSMUSG00000070960|||n.31324626delA||||||	GT:AD:AF:DP:F1R2:F2R1:SB	0/0:31,0:0.029:31:16,0:13,0:17,14,0,0	0/1:20,6:0.249:26:11,4:9,2:6,14,5,1	3147_T1
chr1	31339375	.	G	T	.	PASS	AS_FilterStatus=SITE;AS_SB_TABLE=44,35|6,2;DP=90;ECNT=1;GERMQ=93;MBQ=34,35;MFRL=462,415;MMQ=60,60;MPOS=37;NALOD=1.68;NLOD=13.75;POPAF=6.00;TLOD=22.03;ANN=T|intergenic_region|MODIFIER|Gm6489-Gm10307|ENSMUSG00000094215-ENSMUSG00000070960|intergenic_region|ENSMUSG00000094215-ENSMUSG00000070960|||n.31339375G>T||||||	GT:AD:AF:DP:F1R2:F2R1:SB	0/0:47,0:0.021:47:27,0:18,0:29,18,0,0	0/1:32,8:0.215:40:14,6:17,2:15,17,6,2	2985_T1
chr1	31393155	.	G	A	.	PASS	AS_FilterStatus=SITE;AS_SB_TABLE=32,27|2,2;DP=65;ECNT=1;GERMQ=93;MBQ=35,35;MFRL=436,486;MMQ=60,60;MPOS=68;NALOD=1.41;NLOD=7.22;POPAF=6.00;TLOD=9.10;ANN=A|intergenic_region|MODIFIER|Gm6489-Gm10307|ENSMUSG00000094215-ENSMUSG00000070960|intergenic_region|ENSMUSG00000094215-ENSMUSG00000070960|||n.31393155G>A||||||	GT:AD:AF:DP:F1R2:F2R1:SB	0/0:24,0:0.038:24:12,0:12,0:11,13,0,0	0/1:35,4:0.122:39:11,3:22,1:21,14,2,2	613_T1
chr1	31475722	.	G	A	.	PASS	AS_FilterStatus=SITE;AS_SB_TABLE=23,31|7,3;DP=64;ECNT=1;GERMQ=91;MBQ=35,34;MFRL=430,312;MMQ=60,60;MPOS=38;NALOD=1.48;NLOD=8.68;POPAF=6.00;TLOD=26.24;ANN=A|intergenic_region|MODIFIER|Gm6489-Gm10307|ENSMUSG00000094215-ENSMUSG00000070960|intergenic_region|ENSMUSG00000094215-ENSMUSG00000070960|||n.31475722G>A||||||	GT:AD:AF:DP:F1R2:F2R1:SB	0/0:30,0:0.032:30:16,0:12,0:11,19,0,0	0/1:24,10:0.287:34:12,2:10,8:12,12,7,3	3147_T1
chr1	31478092	.	CT	C	.	PASS	AS_FilterStatus=SITE;AS_SB_TABLE=40,41|6,3;DP=100;ECNT=1;GERMQ=93;MBQ=33,32;MFRL=443,451;MMQ=60,60;MPOS=18;NALOD=1.64;NLOD=12.01;POPAF=6.00;RPA=7,6;RU=T;STR;STRQ=93;TLOD=16.93;ANN=C|intergenic_region|MODIFIER|Gm6489-Gm10307|ENSMUSG00000094215-ENSMUSG00000070960|intergenic_region|ENSMUSG00000094215-ENSMUSG00000070960|||n.31478093delT||||||	GT:AD:AF:DP:F1R2:F2R1:SB	0/0:40,0:0.023:40:17,0:22,0:19,21,0,0	0/1:41,9:0.191:50:16,4:24,5:21,20,6,3	613_T1
chr1	31605082	.	T	C	.	PASS	AS_FilterStatus=SITE;AS_SB_TABLE=31,42|1,2;DP=79;ECNT=1;GERMQ=93;MBQ=34,36;MFRL=438,492;MMQ=60,60;MPOS=34;NALOD=1.62;NLOD=11.74;POPAF=6.00;TLOD=6.66;ANN=C|intergenic_region|MODIFIER|Gm6489-Gm10307|ENSMUSG00000094215-ENSMUSG00000070960|intergenic_region|ENSMUSG00000094215-ENSMUSG00000070960|||n.31605082T>C||||||	GT:AD:AF:DP:F1R2:F2R1:SB	0/0:39,0:0.024:39:18,0:21,0:17,22,0,0	0/1:34,3:0.103:37:13,2:21,1:14,20,1,2	613_T1
chr1	31650922	.	G	T	.	PASS	AS_FilterStatus=SITE;AS_SB_TABLE=19,21|3,0;DP=44;ECNT=1;GERMQ=90;MBQ=34,35;MFRL=461,299;MMQ=60,60;MPOS=45;NALOD=1.39;NLOD=6.83;POPAF=6.00;TLOD=6.66;ANN=T|intergenic_region|MODIFIER|Gm10307-Gm23032|ENSMUSG00000070960-ENSMUSG00000088620|intergenic_region|ENSMUSG00000070960-ENSMUSG00000088620|||n.31650922G>T||||||	GT:AD:AF:DP:F1R2:F2R1:SB	0/0:23,0:0.040:23:13,0:8,0:12,11,0,0	0/1:17,3:0.190:20:11,3:5,0:7,10,3,0	613_T1
chr1	31727251	.	A	T	.	PASS	AS_FilterStatus=SITE;AS_SB_TABLE=40,30|8,3;DP=83;ECNT=1;GERMQ=93;MBQ=35,34;MFRL=448,393;MMQ=60,60;MPOS=31;NALOD=1.59;NLOD=11.35;POPAF=6.00;TLOD=26.55;ANN=T|intergenic_region|MODIFIER|Gm23032-Gm7910|ENSMUSG00000088620-ENSMUSG00000082159|intergenic_region|ENSMUSG00000088620-ENSMUSG00000082159|||n.31727251A>T||||||	GT:AD:AF:DP:F1R2:F2R1:SB	0/0:38,0:0.025:38:14,0:22,0:21,17,0,0	0/1:32,11:0.250:43:14,9:17,1:19,13,8,3	613_T1
chr1	31736025	.	A	G	.	PASS	AS_FilterStatus=SITE;AS_SB_TABLE=30,38|1,3;DP=75;ECNT=1;GERMQ=93;MBQ=34,34;MFRL=431,391;MMQ=60,60;MPOS=36;NALOD=1.47;NLOD=8.38;POPAF=6.00;TLOD=8.97;ANN=G|upstream_gene_variant|MODIFIER|Gm7910|ENSMUSG00000082159|transcript|ENSMUST00000117896|processed_pseudogene||n.-31A>G|||||31|,G|intergenic_region|MODIFIER|Gm23032-Gm7910|ENSMUSG00000088620-ENSMUSG00000082159|intergenic_region|ENSMUSG00000088620-…	GT:AD:AF:DP:F1R2:F2R1:SB	0/0:28,0:0.033:28:15,0:12,0:8,20,0,0	0/1:40,4:0.111:44:24,3:16,1:22,18,1,3	613_T1
chr1	31763594	.	AT	A	.	PASS	AS_FilterStatus=SITE;AS_SB_TABLE=32,25|3,4;DP=70;ECNT=1;GERMQ=93;MBQ=34,34;MFRL=456,477;MMQ=60,60;MPOS=42;NALOD=1.55;NLOD=9.31;POPAF=6.00;RPA=7,6;RU=T;STR;STRQ=93;TLOD=13.64;ANN=A|intergenic_region|MODIFIER|Gm7910-Khdrbs2|ENSMUSG00000082159-ENSMUSG00000026058|intergenic_region|ENSMUSG00000082159-ENSMUSG00000026058|||n.31763595delT||||||	GT:AD:AF:DP:F1R2:F2R1:SB	0/0:31,0:0.028:31:13,0:18,0:17,14,0,0	0/1:26,7:0.228:33:16,4:9,3:15,11,3,4	2985_T1
chr1	31769837	.	T	C	.	PASS	AS_FilterStatus=SITE;AS_SB_TABLE=35,34|3,1;DP=77;ECNT=1;GERMQ=93;MBQ=34,33;MFRL=428,480;MMQ=60,60;MPOS=41;NALOD=1.57;NLOD=10.53;POPAF=6.00;TLOD=8.84;ANN=C|intergenic_region|MODIFIER|Gm7910-Khdrbs2|ENSMUSG00000082159-ENSMUSG00000026058|intergenic_region|ENSMUSG00000082159-ENSMUSG00000026058|||n.31769837T>C||||||	GT:AD:AF:DP:F1R2:F2R1:SB	0/0:35,0:0.026:35:21,0:14,0:16,19,0,0	0/1:34,4:0.125:38:11,0:22,4:19,15,3,1	613_T1
chr1	31826673	.	GA	G	.	PASS	AS_FilterStatus=SITE;AS_SB_TABLE=23,30|3,8;DP=67;ECNT=1;GERMQ=93;MBQ=34,33;MFRL=426,440;MMQ=60,60;MPOS=36;NALOD=1.59;NLOD=11.12;POPAF=6.00;RPA=5,4;RU=A;STR;STRQ=93;TLOD=27.38;ANN=G|intergenic_region|MODIFIER|Gm7910-Khdrbs2|ENSMUSG00000082159-ENSMUSG00000026058|intergenic_region|ENSMUSG00000082159-ENSMUSG00000026058|||n.31826674delA||||||	GT:AD:AF:DP:F1R2:F2R1:SB	0/0:37,0:0.025:37:23,0:14,0:18,19,0,0	0/1:16,11:0.414:27:9,9:7,2:5,11,3,8	2985_T1
chr1	31879906	.	C	T	.	PASS	AS_FilterStatus=SITE;AS_SB_TABLE=28,34|3,7;DP=73;ECNT=1;GERMQ=93;MBQ=36,34;MFRL=436,430;MMQ=60,60;MPOS=38;NALOD=1.53;NLOD=9.93;POPAF=6.00;TLOD=27.54;ANN=T|intergenic_region|MODIFIER|Gm7910-Khdrbs2|ENSMUSG00000082159-ENSMUSG00000026058|intergenic_region|ENSMUSG00000082159-ENSMUSG00000026058|||n.31879906C>T||||||	GT:AD:AF:DP:F1R2:F2R1:SB	0/0:35,0:0.029:35:18,0:17,0:16,19,0,0	0/1:27,10:0.282:37:18,4:9,6:12,15,3,7	613_T1
chr1	31883628	.	TATAGATAG	T	.	PASS	AS_FilterStatus=SITE;AS_SB_TABLE=20,27|2,2;DP=74;ECNT=1;GERMQ=83;MBQ=34,34;MFRL=435,387;MMQ=60,60;MPOS=42;NALOD=1.56;NLOD=8.22;POPAF=6.00;RPA=12,10;RU=ATAG;STR;STRQ=93;TLOD=11.80;ANN=T|intergenic_region|MODIFIER|Gm7910-Khdrbs2|ENSMUSG00000082159-ENSMUSG00000026058|intergenic_region|ENSMUSG00000082159-ENSMUSG00000026058|||n.31883629_31883636delATAGATAG||||||	GT:AD:AF:DP:F1R2:F2R1:SB	0/0:29,0:0.028:29:16,0:10,0:17,12,0,0	0/1:18,4:0.210:22:9,2:4,2:3,15,2,2	2985_T1
chr1	31893982	.	A	G	.	PASS	AS_FilterStatus=SITE;AS_SB_TABLE=33,26|3,1;DP=64;ECNT=1;GERMQ=93;MBQ=34,29;MFRL=442,477;MMQ=60,60;MPOS=48;NALOD=1.57;NLOD=10.79;POPAF=6.00;TLOD=7.92;ANN=G|intergenic_region|MODIFIER|Gm7910-Khdrbs2|ENSMUSG00000082159-ENSMUSG00000026058|intergenic_region|ENSMUSG00000082159-ENSMUSG00000026058|||n.31893982A>G||||||	GT:AD:AF:DP:F1R2:F2R1:SB	0/0:36,0:0.026:36:14,0:21,0:24,12,0,0	0/1:23,4:0.172:27:6,2:17,2:9,14,3,1	3147_T1
chr1	31894127	.	GACAC	G	.	PASS	AS_FilterStatus=SITE;AS_SB_TABLE=16,8|2,1;DP=40;ECNT=1;GERMQ=47;MBQ=36,36;MFRL=428,475;MMQ=60,60;MPOS=50;NALOD=0.834;NLOD=3.55;POPAF=6.00;RPA=18,16;RU=AC;STR;STRQ=93;TLOD=8.44;ANN=G|intergenic_region|MODIFIER|Gm7910-Khdrbs2|ENSMUSG00000082159-ENSMUSG00000026058|intergenic_region|ENSMUSG00000082159-ENSMUSG00000026058|||n.31894128_31894131delACAC||||||	GT:AD:AF:DP:F1R2:F2R1:SB	0/0:12,0:0.059:12:3,0:7,0:9,3,0,0	0/1:12,3:0.233:15:5,2:5,1:7,5,2,1	613_T1
chr1	31949245	.	TACAC	T	.	PASS	AS_FilterStatus=SITE;AS_SB_TABLE=15,8|4,0;DP=55;ECNT=1;GERMQ=43;MBQ=34,34;MFRL=462,388;MMQ=60,60;MPOS=57;NALOD=0.970;NLOD=4.73;POPAF=6.00;RPA=23,21;RU=AC;STR;STRQ=93;TLOD=9.15;ANN=T|intergenic_region|MODIFIER|Gm7910-Khdrbs2|ENSMUSG00000082159-ENSMUSG00000026058|intergenic_region|ENSMUSG00000082159-ENSMUSG00000026058|||n.31949246_31949249delACAC||||||	GT:AD:AF:DP:F1R2:F2R1:SB	0/0:16,0:0.044:16:7,0:6,0:12,4,0,0	0/1:7,4:0.407:11:2,3:2,1:3,4,4,0	2985_T1
chr1	31955877	.	TA	T	.	PASS	AS_FilterStatus=SITE;AS_SB_TABLE=33,33|3,2;DP=76;ECNT=1;GERMQ=93;MBQ=34,34;MFRL=451,416;MMQ=60,60;MPOS=17;NALOD=1.64;NLOD=12.32;POPAF=6.00;RPA=7,6;RU=A;STR;STRQ=93;TLOD=8.92;ANN=T|intergenic_region|MODIFIER|Gm7910-Khdrbs2|ENSMUSG00000082159-ENSMUSG00000026058|intergenic_region|ENSMUSG00000082159-ENSMUSG00000026058|||n.31955878delA||||||	GT:AD:AF:DP:F1R2:F2R1:SB	0/0:41,0:0.022:41:19,0:21,0:21,20,0,0	0/1:25,5:0.187:30:8,1:15,3:12,13,3,2	613_T1
chr1	32007558	.	GAA	G	.	PASS	AS_FilterStatus=SITE;AS_SB_TABLE=29,25|4,3;DP=71;ECNT=1;GERMQ=93;MBQ=35,35;MFRL=442,462;MMQ=60,60;MPOS=44;NALOD=1.16;NLOD=7.20;POPAF=6.00;RPA=11,9;RU=A;STR;STRQ=93;TLOD=18.77;ANN=G|intergenic_region|MODIFIER|Gm7910-Khdrbs2|ENSMUSG00000082159-ENSMUSG00000026058|intergenic_region|ENSMUSG00000082159-ENSMUSG00000026058|||n.32007559_32007560delAA||||||	GT:AD:AF:DP:F1R2:F2R1:SB	0/0:24,0:0.035:24:14,0:10,0:14,10,0,0	0/1:30,7:0.204:37:13,4:12,2:15,15,4,3	613_T1
chr1	32091297	.	AT	A	.	PASS	AS_FilterStatus=SITE;AS_SB_TABLE=30,12|4,0;DP=47;ECNT=1;GERMQ=93;MBQ=34,33;MFRL=404,437;MMQ=60,60;MPOS=42;NALOD=1.46;NLOD=8.11;POPAF=6.00;RPA=5,4;RU=T;STR;STRQ=93;TLOD=8.21;ANN=A|intergenic_region|MODIFIER|Gm7910-Khdrbs2|ENSMUSG00000082159-ENSMUSG00000026058|intergenic_region|ENSMUSG00000082159-ENSMUSG00000026058|||n.32091298delT||||||	GT:AD:AF:DP:F1R2:F2R1:SB	0/0:28,0:0.034:28:16,0:12,0:19,9,0,0	0/1:14,4:0.248:18:7,2:7,2:11,3,4,0	2985_T1
chr1	32092747	.	A	G	.	PASS	AS_FilterStatus=SITE;AS_SB_TABLE=35,24|1,4;DP=66;ECNT=1;GERMQ=93;MBQ=34,35;MFRL=464,490;MMQ=60,60;MPOS=25;NALOD=1.51;NLOD=9.33;POPAF=6.00;TLOD=12.67;ANN=G|intergenic_region|MODIFIER|Gm7910-Khdrbs2|ENSMUSG00000082159-ENSMUSG00000026058|intergenic_region|ENSMUSG00000082159-ENSMUSG00000026058|||n.32092747A>G||||||	GT:AD:AF:DP:F1R2:F2R1:SB	0/0:31,0:0.030:31:21,0:10,0:16,15,0,0	0/1:28,5:0.171:33:13,1:15,4:19,9,1,4	2985_T1
chr1	32093505	.	C	T	.	PASS	AS_FilterStatus=SITE;AS_SB_TABLE=33,36|2,2;DP=75;ECNT=1;GERMQ=93;MBQ=33,34;MFRL=452,451;MMQ=60,60;MPOS=19;NALOD=1.46;NLOD=8.43;POPAF=6.00;TLOD=8.72;ANN=T|intergenic_region|MODIFIER|Gm7910-Khdrbs2|ENSMUSG00000082159-ENSMUSG00000026058|intergenic_region|ENSMUSG00000082159-ENSMUSG00000026058|||n.32093505C>T||||||	GT:AD:AF:DP:F1R2:F2R1:SB	0/0:28,0:0.033:28:13,0:15,0:13,15,0,0	0/1:41,4:0.108:45:17,2:23,2:20,21,2,2	613_T1
chr1	32132865	.	C	G	.	PASS	AS_FilterStatus=SITE;AS_SB_TABLE=22,26|1,2;DP=57;ECNT=1;GERMQ=93;MBQ=32,33;MFRL=437,293;MMQ=60,60;MPOS=64;NALOD=0.830;NLOD=6.49;POPAF=6.00;TLOD=5.16;ANN=G|intergenic_region|MODIFIER|Gm7910-Khdrbs2|ENSMUSG00000082159-ENSMUSG00000026058|intergenic_region|ENSMUSG00000082159-ENSMUSG00000026058|||n.32132865C>G||||||	GT:AD:AF:DP:F1R2:F2R1:SB	0/0:23,0:0.041:23:10,0:7,0:9,14,0,0	0/1:25,3:0.134:28:9,1:13,2:13,12,1,2	613_T1
chr1	32164837	.	T	C	.	PASS	AS_FilterStatus=SITE;AS_SB_TABLE=34,35|1,4;DP=79;ECNT=1;GERMQ=93;MBQ=34,28;MFRL=429,376;MMQ=60,60;MPOS=53;NALOD=1.58;NLOD=10.53;POPAF=6.00;TLOD=9.43;ANN=C|intergenic_region|MODIFIER|Gm7910-Khdrbs2|ENSMUSG00000082159-ENSMUSG00000026058|intergenic_region|ENSMUSG00000082159-ENSMUSG00000026058|||n.32164837T>C||||||	GT:AD:AF:DP:F1R2:F2R1:SB	0/0:35,0:0.026:35:17,0:18,0:15,20,0,0	0/1:34,5:0.146:39:17,2:16,3:19,15,1,4	613_T1
chr1	32197240	.	CA	C	.	PASS	AS_FilterStatus=SITE;AS_SB_TABLE=45,30|1,3;DP=82;ECNT=1;GERMQ=93;MBQ=33,37;MFRL=434,438;MMQ=60,60;MPOS=34;NALOD=1.60;NLOD=11.42;POPAF=6.00;RPA=6,5;RU=A;STR;STRQ=93;TLOD=6.11;ANN=C|intron_variant|MODIFIER|Khdrbs2|ENSMUSG00000026058|transcript|ENSMUST00000027226|protein_coding|1/8|c.91+24238delA||||||INFO_REALIGN_3_PRIME	GT:AD:AF:DP:F1R2:F2R1:SB	0/0:38,0:0.025:38:17,0:20,0:23,15,0,0	0/1:37,4:0.115:41:15,2:19,2:22,15,1,3	613_T1
chr1	32210956	.	AG	A	.	PASS	AS_FilterStatus=SITE;AS_SB_TABLE=29,27|4,1;DP=63;ECNT=1;GERMQ=93;MBQ=35,34;MFRL=445,357;MMQ=60,60;MPOS=65;NALOD=1.48;NLOD=8.42;POPAF=6.00;RPA=5,4;RU=G;STR;STRQ=93;TLOD=9.52;ANN=A|downstream_gene_variant|MODIFIER|Gm25814|ENSMUSG00000064688|transcript|ENSMUST00000082754|snRNA||n.*2176delC|||||2176|,A|intron_variant|MODIFIER|Khdrbs2|ENSMUSG00000026058|transcript|ENSMUST00000027226|protein_coding|1/8…	GT:AD:AF:DP:F1R2:F2R1:SB	0/0:29,0:0.032:29:12,0:17,0:16,13,0,0	0/1:27,5:0.176:32:12,3:14,2:13,14,4,1	2985_T1
chr1	32213974	.	C	T	.	PASS	AS_FilterStatus=SITE;AS_SB_TABLE=34,37|4,2;DP=79;ECNT=1;GERMQ=93;MBQ=34,34;MFRL=428,397;MMQ=60,60;MPOS=34;NALOD=1.56;NLOD=10.44;POPAF=6.00;TLOD=15.19;ANN=T|upstream_gene_variant|MODIFIER|Gm25814|ENSMUSG00000064688|transcript|ENSMUST00000082754|snRNA||n.-735G>A|||||735|,T|intron_variant|MODIFIER|Khdrbs2|ENSMUSG00000026058|transcript|ENSMUST00000027226|protein_coding|1/8|c.92-29926C>T||||||	GT:AD:AF:DP:F1R2:F2R1:SB	0/0:36,0:0.027:36:17,0:17,0:18,18,0,0	0/1:35,6:0.163:41:14,2:17,4:16,19,4,2	613_T1
chr1	32216633	.	CAA	C	.	PASS	AS_FilterStatus=SITE;AS_SB_TABLE=30,28|5,1;DP=71;ECNT=1;GERMQ=93;MBQ=34,33;MFRL=471,436;MMQ=60,60;MPOS=26;NALOD=1.04;NLOD=8.14;POPAF=6.00;RPA=14,12;RU=A;STR;STRQ=93;TLOD=9.69;ANN=C|upstream_gene_variant|MODIFIER|Gm25814|ENSMUSG00000064688|transcript|ENSMUST00000082754|snRNA||n.-3396_-3395delTT|||||3395|,C|intron_variant|MODIFIER|Khdrbs2|ENSMUSG00000026058|transcript|ENSMUST00000027226|protein_cod…	GT:AD:AF:DP:F1R2:F2R1:SB	0/0:27,0:0.032:27:13,0:12,0:12,15,0,0	0/1:31,6:0.156:37:14,4:14,2:18,13,5,1	613_T1
chr1	32234974	.	AT	A	.	PASS	AS_FilterStatus=SITE;AS_SB_TABLE=38,34|2,4;DP=79;ECNT=1;GERMQ=93;MBQ=35,34;MFRL=434,420;MMQ=60,60;MPOS=16;NALOD=1.73;NLOD=15.32;POPAF=6.00;RPA=7,6;RU=T;STR;STRQ=93;TLOD=11.76;ANN=A|intron_variant|MODIFIER|Khdrbs2|ENSMUSG00000026058|transcript|ENSMUST00000027226|protein_coding|1/8|c.92-8919delT||||||INFO_REALIGN_3_PRIME	GT:AD:AF:DP:F1R2:F2R1:SB	0/0:51,0:0.018:51:26,0:24,0:27,24,0,0	0/1:21,6:0.240:27:6,4:15,1:11,10,2,4	613_T1
chr1	32238387	.	TA	T	.	PASS	AS_FilterStatus=SITE;AS_SB_TABLE=46,39|3,2;DP=102;ECNT=1;GERMQ=93;MBQ=34,34;MFRL=448,491;MMQ=60,60;MPOS=27;NALOD=1.65;NLOD=11.71;POPAF=6.00;RPA=5,4;RU=A;STR;STRQ=93;TLOD=8.33;ANN=T|intron_variant|MODIFIER|Khdrbs2|ENSMUSG00000026058|transcript|ENSMUST00000027226|protein_coding|1/8|c.92-5508delA||||||INFO_REALIGN_3_PRIME	GT:AD:AF:DP:F1R2:F2R1:SB	0/0:39,0:0.023:39:21,0:17,0:20,19,0,0	0/1:46,5:0.117:51:19,2:26,2:26,20,3,2	613_T1
chr1	32265954	.	G	A	.	PASS	AS_FilterStatus=SITE;AS_SB_TABLE=35,15|3,0;DP=53;ECNT=2;GERMQ=93;MBQ=36,33;MFRL=447,353;MMQ=60,59;MPOS=6;NALOD=1.45;NLOD=8.13;POPAF=6.00;TLOD=6.55;ANN=A|intron_variant|MODIFIER|Khdrbs2|ENSMUSG00000026058|transcript|ENSMUST00000027226|protein_coding|2/8|c.219+21927G>A||||||	GT:AD:AF:DP:F1R2:F2R1:PGT:PID:PS:SB	0|0:28,0:0.034:28:13,0:14,0:0|1:32265954_G_A:32265954:18,10,0,0	0|1:22,3:0.148:25:6,2:11,1:0|1:32265954_G_A:32265954:17,5,3,0	613_T1
chr1	32295259	.	T	C	.	PASS	AS_FilterStatus=SITE;AS_SB_TABLE=32,29|3,0;DP=66;ECNT=1;GERMQ=93;MBQ=36,33;MFRL=479,451;MMQ=60,60;MPOS=24;NALOD=1.57;NLOD=10.84;POPAF=6.00;TLOD=6.47;ANN=C|intron_variant|MODIFIER|Khdrbs2|ENSMUSG00000026058|transcript|ENSMUST00000027226|protein_coding|2/8|c.220-38207T>C||||||	GT:AD:AF:DP:F1R2:F2R1:SB	0/0:36,0:0.026:36:15,0:21,0:20,16,0,0	0/1:25,3:0.132:28:12,1:13,2:12,13,3,0	3147_T1
[truncated: 67,099 more rows]
