# Supplementary material for: Oxidative stress accelerates repeat sequence instability and base substitutions promoting gastrointestinal driver mutations in MSH2 deficient mice
Source: Genes Environ. 2025 Oct 23;47:19. doi: 10.1186/s41021-025-00342-y (PMC12548293; doi:10.1186/s41021-025-00342-y)
Supplement: Supplementary file 4 — Additional file 4: Supplemental Table S3. Driver mutation candidates. [file 41021_2025_342_MOESM4_ESM.xlsx]

## Sheet: variant_summary_SupTable
Supplemental Table S3
tumor sample_ID	NGS	#CHROM	POS	REF	ALT	flanking sequence	type	Annotation	Annotation_Impact	Gene_Name	Variant	Mutation_Description_1	Mutation_Description_2	Classification
A2064_T1_H,	WES	chr18	34314433	AAG	A	-GA / (GA)4	indel	frameshift	HIGH	Apc	c.4390_4391delAG / p.Ser1464fs	Frameshift causing C-terminal truncation, retaining β-catenin binding site	Partial loss of Wnt signaling control; major domain loss leads to loss-of-function	loss-of-function driver mutation
A1812M_T1_H	WES	chr18	34314433	AAG	A	-GA / (GA)4	indel	frameshift	HIGH	Apc	c.4390_4391delAG / p.Ser1464fs	Frameshift causing C-terminal truncation, retaining β-catenin binding site	Partial loss of Wnt signaling control; major domain loss leads to loss-of-function	loss-of-function driver mutation
A2064_T1_H	WES	chr18	34312830	CCA	C	-CA /(CA)4	indel	frameshift	HIGH	Apc	c.2786_2787delAC / p.His929fs	Frameshift causing truncation in the mid-region of the protein	Truncation before β-catenin binding domain ensures loss of function	loss-of-function driver mutation
2985_SIT	WGS	chr18	34313515	GA	G	-A / (GAA)4	indel	frameshift	HIGH	Apc	c.3465delA / p.Glu1156fs	Frameshift truncation just before major functional domains	Central functional domains including β-catenin/Axin binding sites are lost	loss-of-function driver mutation
2985_SIT	WGS	chr18	34313845	AC	A	-C / (C)4	indel	frameshift	HIGH	Apc	c.3797delC / p.Pro1266fs	Frameshift at the start of β-catenin binding region	Complete loss of functional domains, disruption of Wnt suppression	loss-of-function driver mutation
3147_SIT	WGS	chr18	34313855	GT	G	-T/ (T)5	indel	frameshift	HIGH	Apc	c.3808delT / p.Ser1270fs	Frameshift mutation in the core of the functional domain	Activation of the Wnt signaling pathway due to loss of the β-catenin/Axin binding site	loss-of-function driver mutation
613_SIT1	WGS	chr18	34298609	C	T	CCC(G)4>CCT(G)4	snv	missense	MODERATE	Apc	c.1114C>T / p.Arg372Trp	Missense mutation (R→W) outside the functional domain	In silico predicted deleterious at conserved site	unknown clinical significance
613_SIT1	WGS	chr9	120950606	C	T	TTCT>TTTT	snv	missense	MODERATE	Ctnnb1	c.98C>T / p.Ser33Phe	Missense mutation disrupting the GSK3β phosphorylation site	Stabilization of β-catenin due to loss of phosphorylation → Activation of Wnt signaling	Gain-of-function and activating driver mutation
A2064_T2_H	WES	chr9	120950630	C	T	(CCA)3>(CCACCA)2TCA	snv	missense	MODERATE	Ctnnb1	c.122C>T / p.Thr41Ile	Missense mutation disrupting the GSK3β phosphorylation site	Stabilization of β-catenin due to loss of phosphorylation → Activation of Wnt signaling	Gain-of-function and activating driver mutation
